# Supplementary material for: Proteomic Analysis of Salivary Extracellular Vesicles from COVID-19 Patients Reveals a Specific Anti-COVID-19 Response Protein Signature
Source: Int J Mol Sci. 2024 Mar 26;25(7):3704. doi: 10.3390/ijms25073704 (PMC11011897; doi:10.3390/ijms25073704)
Supplement: Supplementary file 1 [file ijms-25-03704-s001.zip]

Archive with 7 entries (7 files):
- Figure S1.tiff
- Figure S2.tiff
- Figure S3.tiff
- Figure S4.tiff
- Figure S5.tiff
- SUPP_FIG_Legends_110324.pdf
- Supplementary table S1.xlsx
