# Supplementary material for: Proteomic Analysis of Salivary Extracellular Vesicles from COVID-19 Patients Reveals a Specific Anti-COVID-19 Response Protein Signature
Source: Int J Mol Sci. 2024 Mar 26;25(7):3704. doi: 10.3390/ijms25073704 (PMC11011897; doi:10.3390/ijms25073704)
Supplement: Supplementary file 1 [file ijms-25-03704-s001.zip › Supplementary table S1.xlsx]

## Sheet: Table S1
The comprehensive proteome from sEVs pools from COVID-19 (+) and HCC subjects
Protein Group	Protein ID	Accession	Accession	Gene name	Specie	-10lgP	Coverage (%)	Coverage (%) Sample 1	Coverage (%) Sample 2	Coverage (%) Sample 3	Coverage (%) Sample 4	Intensity Sample 1	Intensity Sample 2	Intensity Sample 3	Intensity Sample 4	#Peptides	#Unique	#Spec Sample 1	#Spec Sample 2	#Spec Sample 3	#Spec Sample 4	PTM	Avg. Mass	Description
1	1	Q9HC84|MUC5B_HUMAN	Q9HC84	MUC5B	HUMAN	508.47	26	24	23	24	24	5498800	4659300	4430700	4318500	128	121	4006	4339	4405	4325	Carbamidomethylation; Carbamylation; Deamidation (NQ); Oxidation (M); Acetylation (Protein N-term)	596344	Mucin-5B OS=Homo sapiens OX=9606 GN=MUC5B PE=1 SV=3
14	16	P35579|MYH9_HUMAN	P35579	MYH9	HUMAN	403	70	65	66	57	61	648890	484180	312180	290990	171	139	530	553	351	391	Carbamidomethylation; Carbamylation; Deamidation (NQ); Oxidation (M); Acetylation (Protein N-term)	226530	Myosin-9 OS=Homo sapiens OX=9606 GN=MYH9 PE=1 SV=4
7	9	P02788|TRFL_HUMAN	P02788	TRFL	HUMAN	389.11	79	77	78	78	77	1650500	1255800	948690	879240	71	71	956	1083	907	925	Carbamidomethylation; Carbamylation; Deamidation (NQ); Oxidation (M); Acetylation (Protein N-term)	78182	Lactotransferrin OS=Homo sapiens OX=9606 GN=LTF PE=1 SV=6
13	14	P02768|ALBU_HUMAN	P02768	ALBU	HUMAN	374.83	92	92	88	76	76	1280000	1150300	436200	368690	80	80	635	665	283	257	Carbamidomethylation; Carbamylation; Deamidation (NQ); Oxidation (M); Acetylation (Protein N-term)	69367	Albumin OS=Homo sapiens OX=9606 GN=ALB PE=1 SV=2
2	2	P0DTE8|AMY1C_HUMAN	P0DTE8	AMY1C	HUMAN	370	84	82	82	82	74	769340	626250	646550	808680	44	7	2105	1969	2542	2389	Carbamidomethylation; Carbamylation; Deamidation (NQ); Oxidation (M); Acetylation (Protein N-term)	57768	Alpha-amylase 1C OS=Homo sapiens OX=9606 GN=AMY1C PE=1 SV=1
2	3	P0DTE7|AMY1B_HUMAN	P0DTE7	AMY1B	HUMAN	370	84	82	82	82	74	769340	626250	646550	808680	44	7	2105	1969	2542	2389	Carbamidomethylation; Carbamylation; Deamidation (NQ); Oxidation (M); Acetylation (Protein N-term)	57768	Alpha-amylase 1B OS=Homo sapiens OX=9606 GN=AMY1B PE=1 SV=1
2	4	P0DUB6|AMY1A_HUMAN	P0DUB6	AMY1A	HUMAN	370	84	82	82	82	74	769340	626250	646550	808680	44	7	2105	1969	2542	2389	Carbamidomethylation; Carbamylation; Deamidation (NQ); Oxidation (M); Acetylation (Protein N-term)	57768	Alpha-amylase 1A OS=Homo sapiens OX=9606 GN=AMY1A PE=1 SV=1
5	7	P01833|PIGR_HUMAN	P01833	PIGR	HUMAN	364.46	56	56	52	51	51	1699500	1568700	986940	949320	44	44	1179	1205	881	836	Carbamidomethylation; Carbamylation; Deamidation (NQ); Acetylation (Protein N-term)	83284	Polymeric immunoglobulin receptor OS=Homo sapiens OX=9606 GN=PIGR PE=1 SV=4
46	29	Q9Y6R7|FCGBP_HUMAN	Q9Y6R7	FCGBP	HUMAN	353.04	21	19	18	14	13	316520	263960	92557	84706	84	84	243	264	107	110	Carbamidomethylation; Carbamylation; Deamidation (NQ); Oxidation (M); Acetylation (Protein N-term)	572021	IgGFc-binding protein OS=Homo sapiens OX=9606 GN=FCGBP PE=1 SV=3
3	5	P19961|AMY2B_HUMAN	P19961	AMY2B	HUMAN	351.84	70	68	69	69	67	634.27	3212.8	2994.6	4586.3	38	1	1580	1503	1987	1891	Carbamidomethylation; Carbamylation; Deamidation (NQ); Oxidation (M); Acetylation (Protein N-term)	57710	Alpha-amylase 2B OS=Homo sapiens OX=9606 GN=AMY2B PE=1 SV=1
37	37	P01024|CO3_HUMAN	P01024	CO3	HUMAN	347.15	59	56	57	40	38	457270	354050	165730	125640	96	96	281	264	126	158	Carbamidomethylation; Carbamylation; Deamidation (NQ); Oxidation (M)	187147	Complement C3 OS=Homo sapiens OX=9606 GN=C3 PE=1 SV=2
36	71	P04114|APOB_HUMAN	P04114	APOB	HUMAN	346.56	35	23	22	31	28	174600	135540	233660	204430	153	153	166	154	255	264	Carbamidomethylation; Carbamylation; Deamidation (NQ); Oxidation (M); Acetylation (Protein N-term)	515611	Apolipoprotein B-100 OS=Homo sapiens OX=9606 GN=APOB PE=1 SV=2
72	40	P21333|FLNA_HUMAN	P21333	FLNA	HUMAN	346.5	42	39	35	27	27	190280	114040	54529	56996	93	86	143	141	89	80	Carbamidomethylation; Carbamylation; Deamidation (NQ); Oxidation (M)	280737	Filamin-A OS=Homo sapiens OX=9606 GN=FLNA PE=1 SV=4
12	23	P05164|PERM_HUMAN	P05164	PERM	HUMAN	336.28	56	55	55	56	55	641770	575350	827910	794050	48	43	405	505	641	623	Carbamidomethylation; Carbamylation; Deamidation (NQ); Oxidation (M); Acetylation (Protein N-term)	83869	Myeloperoxidase OS=Homo sapiens OX=9606 GN=MPO PE=1 SV=1
4	20	P01876|IGHA1_HUMAN	P01876	IGHA1	HUMAN	334.2	98	98	90	80	66	917190	965670	508890	626930	27	16	1242	1236	838	860	Carbamidomethylation; Carbamylation; Deamidation (NQ); Oxidation (M); Acetylation (Protein N-term)	37655	Immunoglobulin heavy constant alpha 1 OS=Homo sapiens OX=9606 GN=IGHA1 PE=1 SV=2
29	11	P13645|K1C10_HUMAN	P13645	K1C10	HUMAN	330.56	66	56	56	65	65	207200	145670	347150	375360	39	32	122	127	403	406	Carbamidomethylation; Carbamylation; Deamidation (NQ); Oxidation (M); Acetylation (Protein N-term)	58827	Keratin type I cytoskeletal 10 OS=Homo sapiens OX=9606 GN=KRT10 PE=1 SV=6
22	15	P04264|K2C1_HUMAN	P04264	K2C1	HUMAN	330.22	74	59	52	64	73	316270	234190	455440	462170	52	46	199	191	423	437	Carbamidomethylation; Carbamylation; Deamidation (NQ); Oxidation (M); Acetylation (Protein N-term)	66039	Keratin type II cytoskeletal 1 OS=Homo sapiens OX=9606 GN=KRT1 PE=1 SV=6
8	19	Q9UGM3|DMBT1_HUMAN	Q9UGM3	DMBT1	HUMAN	323.46	21	20	18	11	13	1640900	1278500	136940	137820	37	37	1129	1215	147	129	Carbamidomethylation; Carbamylation; Deamidation (NQ); Oxidation (M); Acetylation (Protein N-term)	260734	Deleted in malignant brain tumors 1 protein OS=Homo sapiens OX=9606 GN=DMBT1 PE=1 SV=2
19	21	P02675|FIBB_HUMAN	P02675	FIBB	HUMAN	323.29	83	83	82	68	58	550580	492140	125040	126720	53	53	474	512	187	154	Carbamidomethylation; Carbamylation; Deamidation (NQ); Oxidation (M); Acetylation (Protein N-term)	55928	Fibrinogen beta chain OS=Homo sapiens OX=9606 GN=FGB PE=1 SV=2
10	12	P60709|ACTB_HUMAN	P60709	ACTB	HUMAN	322.59	94	93	85	73	76	128140	113970	104850	87093	37	2	678	665	525	525	Carbamidomethylation; Carbamylation; Deamidation (NQ); Oxidation (M); Acetylation (Protein N-term)	41737	Actin cytoplasmic 1 OS=Homo sapiens OX=9606 GN=ACTB PE=1 SV=1
51	17	P35908|K22E_HUMAN	P35908	K22E	HUMAN	321.69	72	56	53	69	65	98864	98520	184500	143080	49	36	102	107	206	184	Carbamidomethylation; Carbamylation; Deamidation (NQ); Oxidation (M); Acetylation (Protein N-term)	65433	Keratin type II cytoskeletal 2 epidermal OS=Homo sapiens OX=9606 GN=KRT2 PE=1 SV=2
11	13	P63261|ACTG_HUMAN	P63261	ACTG	HUMAN	320.63	94	93	85	73	76	56963	56084	43577	41784	36	1	657	645	505	515	Carbamidomethylation; Carbamylation; Deamidation (NQ); Oxidation (M); Acetylation (Protein N-term)	41793	Actin cytoplasmic 2 OS=Homo sapiens OX=9606 GN=ACTG1 PE=1 SV=1
20	8	P04083|ANXA1_HUMAN	P04083	ANXA1	HUMAN	318.92	82	80	78	77	79	492150	435900	528630	487680	32	32	273	287	369	364	Carbamidomethylation; Carbamylation; Deamidation (NQ); Oxidation (M); Acetylation (Protein N-term)	38714	Annexin A1 OS=Homo sapiens OX=9606 GN=ANXA1 PE=1 SV=2
31	30	P19013|K2C4_HUMAN	P19013	K2C4	HUMAN	318.64	77	63	64	77	74	307890	238270	458610	385660	57	45	166	160	327	335	Carbamidomethylation; Carbamylation; Deamidation (NQ); Oxidation (M); Acetylation (Protein N-term)	56144	Keratin type II cytoskeletal 4 OS=Homo sapiens OX=9606 GN=KRT4 PE=1 SV=5
21	22	P13646|K1C13_HUMAN	P13646	K1C13	HUMAN	318.48	77	59	63	72	70	261660	212460	389340	350160	40	24	171	193	446	465	Carbamidomethylation; Carbamylation; Deamidation (NQ); Oxidation (M); Acetylation (Protein N-term)	49588	Keratin type I cytoskeletal 13 OS=Homo sapiens OX=9606 GN=KRT13 PE=1 SV=4
54	45	P01023|A2MG_HUMAN	P01023	A2MG	HUMAN	316.04	51	47	44	30	35	221680	242700	69784	68488	59	53	190	216	87	85	Carbamidomethylation; Carbamylation; Deamidation (NQ); Oxidation (M); Acetylation (Protein N-term)	163290	Alpha-2-macroglobulin OS=Homo sapiens OX=9606 GN=A2M PE=1 SV=3
15	10	P01871|IGHM_HUMAN	P01871	IGHM	HUMAN	313.76	72	72	72	57	57	699060	681900	316910	306330	31	31	535	521	295	294	Carbamidomethylation; Carbamylation; Deamidation (NQ); Oxidation (M); Acetylation (Protein N-term)	49440	Immunoglobulin heavy constant mu OS=Homo sapiens OX=9606 GN=IGHM PE=1 SV=4
48	18	Q08188|TGM3_HUMAN	Q08188	TGM3	HUMAN	312.53	60	48	48	58	58	216610	197180	248760	201090	40	40	156	143	190	213	Carbamidomethylation; Carbamylation; Deamidation (NQ); Oxidation (M); Acetylation (Protein N-term)	76632	Protein-glutamine gamma-glutamyltransferase E OS=Homo sapiens OX=9606 GN=TGM3 PE=1 SV=4
41	25	P02538|K2C6A_HUMAN	P02538	K2C6A	HUMAN	311.25	67	55	50	64	62	2292.1	1710.8	14964	3317.8	47	2	116	114	253	277	Carbamidomethylation; Carbamylation; Deamidation (NQ); Acetylation (Protein N-term)	60045	Keratin type II cytoskeletal 6A OS=Homo sapiens OX=9606 GN=KRT6A PE=1 SV=3
44	32	P04259|K2C6B_HUMAN	P04259	K2C6B	HUMAN	306.49	67	51	50	64	62	6552.2	3289.2	6179.4	10113	46	3	109	113	246	259	Carbamidomethylation; Carbamylation; Deamidation (NQ); Acetylation (Protein N-term)	60067	Keratin type II cytoskeletal 6B OS=Homo sapiens OX=9606 GN=KRT6B PE=1 SV=5
42	24	P05107|ITB2_HUMAN	P05107	ITB2	HUMAN	305.29	64	58	56	56	56	332070	280000	216200	195250	44	43	206	190	173	185	Carbamidomethylation; Carbamylation; Deamidation (NQ); Oxidation (M); Acetylation (Protein N-term)	84782	Integrin beta-2 OS=Homo sapiens OX=9606 GN=ITGB2 PE=1 SV=2
123	50	Q9Y490|TLN1_HUMAN	Q9Y490	TLN1	HUMAN	304.08	35	28	18	17	19	57465	27917	31957	21387	68	62	90	51	59	47	Carbamidomethylation; Carbamylation; Deamidation (NQ); Acetylation (Protein N-term)	269765	Talin-1 OS=Homo sapiens OX=9606 GN=TLN1 PE=1 SV=3
86	28	P35527|K1C9_HUMAN	P35527	K1C9	HUMAN	295.36	46	38	37	45	46	195900	151800	201370	168360	27	26	73	78	103	116	Carbamylation; Deamidation (NQ); Oxidation (M)	62064	Keratin type I cytoskeletal 9 OS=Homo sapiens OX=9606 GN=KRT9 PE=1 SV=3
55	52	P02671|FIBA_HUMAN	P02671	FIBA	HUMAN	294.35	38	37	36	24	18	307940	312600	40397	47733	54	54	226	256	42	50	Carbamidomethylation; Carbamylation; Deamidation (NQ); Oxidation (M); Acetylation (Protein N-term)	94973	Fibrinogen alpha chain OS=Homo sapiens OX=9606 GN=FGA PE=1 SV=2
91	34	P11215|ITAM_HUMAN	P11215	ITAM	HUMAN	292.89	44	34	36	35	39	131670	146870	84156	75528	45	44	102	108	63	80	Carbamidomethylation; Carbamylation; Deamidation (NQ); Oxidation (M); Acetylation (Protein N-term)	127178	Integrin alpha-M OS=Homo sapiens OX=9606 GN=ITGAM PE=1 SV=2
83	79	Q8WUM4|PDC6I_HUMAN	Q8WUM4	PDC6I	HUMAN	291.92	63	58	60	54	52	149730	157110	74102	55084	55	55	103	124	84	84	Carbamidomethylation; Carbamylation; Deamidation (NQ); Oxidation (M); Acetylation (Protein N-term)	96023	Programmed cell death 6-interacting protein OS=Homo sapiens OX=9606 GN=PDCD6IP PE=1 SV=1
66	51	A8K2U0|A2ML1_HUMAN	A8K2U0	A2ML1	HUMAN	290.68	35	28	29	32	33	150430	163690	131200	115960	47	47	125	115	130	127	Carbamidomethylation; Carbamylation; Deamidation (NQ); Oxidation (M)	161106	Alpha-2-macroglobulin-like protein 1 OS=Homo sapiens OX=9606 GN=A2ML1 PE=1 SV=3
118	42	P0C0L4|CO4A_HUMAN	P0C0L4	CO4A	HUMAN	290.58	30	27	26	14	20	2303.1	2391.1	1159.3	839.54	46	2	82	82	43	55	Carbamidomethylation; Carbamylation; Deamidation (NQ); Oxidation (M)	192784	Complement C4-A OS=Homo sapiens OX=9606 GN=C4A PE=1 SV=2
119	41	P0C0L5|CO4B_HUMAN	P0C0L5	CO4B	HUMAN	290.54	30	26	26	14	20		1662.2	899.45	1754	46	2	80	82	42	55	Carbamidomethylation; Carbamylation; Deamidation (NQ); Oxidation (M)	192750	Complement C4-B OS=Homo sapiens OX=9606 GN=C4B PE=1 SV=2
33	38	P02679|FIBG_HUMAN	P02679	FIBG	HUMAN	290.5	66	66	65	52	52	632170	486870	149350	148170	40	40	344	338	119	119	Carbamidomethylation; Carbamylation; Deamidation (NQ); Oxidation (M); Acetylation (Protein N-term)	51512	Fibrinogen gamma chain OS=Homo sapiens OX=9606 GN=FGG PE=1 SV=3
16	86	P98088|MUC5A_HUMAN	P98088	MUC5A	HUMAN	288.5	8	7	6	1	1	27226	26511	1689.5	3020.3	38	31	441	398	347	350	Carbamidomethylation; Carbamylation; Deamidation (NQ); Oxidation (M); Acetylation (Protein N-term)	585574	Mucin-5AC OS=Homo sapiens OX=9606 GN=MUC5AC PE=1 SV=4
9	35	P01877|IGHA2_HUMAN	P01877	IGHA2	HUMAN	288.3	84	84	76	57	57	426660	372520	76481	129870	24	13	890	867	391	441	Carbamidomethylation; Carbamylation; Deamidation (NQ); Oxidation (M); Acetylation (Protein N-term)	36591	Immunoglobulin heavy constant alpha 2 OS=Homo sapiens OX=9606 GN=IGHA2 PE=1 SV=4
65	33	O43490|PROM1_HUMAN	O43490	PROM1	HUMAN	288.01	41	41	39	37	35	161950	158710	126240	105010	34	34	141	143	120	117	Carbamidomethylation; Carbamylation; Deamidation (NQ); Oxidation (M)	97202	Prominin-1 OS=Homo sapiens OX=9606 GN=PROM1 PE=1 SV=1
17	36	P01857|IGHG1_HUMAN	P01857	IGHG1	HUMAN	283.97	75	75	73	65	58	96621	93862	116290	124590	23	9	438	404	330	313	Carbamidomethylation; Carbamylation; Deamidation (NQ); Oxidation (M); Acetylation (Protein N-term)	36106	Immunoglobulin heavy constant gamma 1 OS=Homo sapiens OX=9606 GN=IGHG1 PE=1 SV=1
25	53	P68032|ACTC_HUMAN	P68032	ACTC	HUMAN	283.91	70	64	54	37	46	528.09	0	942.68	0	27	1	329	320	245	232	Carbamidomethylation; Carbamylation; Deamidation (NQ); Oxidation (M); Acetylation (Protein N-term)	42019	Actin alpha cardiac muscle 1 OS=Homo sapiens OX=9606 GN=ACTC1 PE=1 SV=1
27	67	P68133|ACTS_HUMAN	P68133	ACTS	HUMAN	282.06	64	52	54	32	41		477.26			26	1	322	321	243	230	Carbamidomethylation; Carbamylation; Deamidation (NQ); Oxidation (M); Acetylation (Protein N-term)	42051	Actin alpha skeletal muscle OS=Homo sapiens OX=9606 GN=ACTA1 PE=1 SV=1
88	78	P12814|ACTN1_HUMAN	P12814	ACTN1	HUMAN	281.92	57	45	50	45	42	83350	36648	28761	30485	45	27	110	101	76	79	Carbamidomethylation; Carbamylation; Deamidation (NQ); Oxidation (M); Acetylation (Protein N-term)	103058	Alpha-actinin-1 OS=Homo sapiens OX=9606 GN=ACTN1 PE=1 SV=2
80	48	P08133|ANXA6_HUMAN	P08133	ANXA6	HUMAN	281.88	63	47	49	57	55	118160	100050	97292	102400	44	44	85	86	121	114	Carbamidomethylation; Carbamylation; Deamidation (NQ); Oxidation (M)	75873	Annexin A6 OS=Homo sapiens OX=9606 GN=ANXA6 PE=1 SV=3
60	43	P02533|K1C14_HUMAN	P02533	K1C14	HUMAN	281.63	72	52	48	68	57	6576.4	3609.9	11222	9934	35	9	74	88	183	193	Carbamidomethylation; Carbamylation; Deamidation (NQ); Oxidation (M); Acetylation (Protein N-term)	51562	Keratin type I cytoskeletal 14 OS=Homo sapiens OX=9606 GN=KRT14 PE=1 SV=4
67	27	Q8TDL5|BPIB1_HUMAN	Q8TDL5	BPIB1	HUMAN	280.83	68	68	64	62	61	250970	227600	182430	165880	26	26	127	130	119	117	Carbamidomethylation; Carbamylation; Deamidation (NQ); Oxidation (M); Acetylation (Protein N-term)	52442	BPI fold-containing family B member 1 OS=Homo sapiens OX=9606 GN=BPIFB1 PE=1 SV=1
68	46	P14618|KPYM_HUMAN	P14618	KPYM	HUMAN	278.78	76	72	70	60	61	174490	158800	85241	111650	34	34	125	142	102	123	Carbamidomethylation; Carbamylation; Deamidation (NQ); Oxidation (M); Acetylation (Protein N-term)	57937	Pyruvate kinase PKM OS=Homo sapiens OX=9606 GN=PKM PE=1 SV=4
50	47	P08779|K1C16_HUMAN	P08779	K1C16	HUMAN	278.32	82	57	53	77	81	24844	11950	54483	33557	43	24	78	86	219	222	Carbamidomethylation; Carbamylation; Deamidation (NQ); Oxidation (M); Acetylation (Protein N-term)	51268	Keratin type I cytoskeletal 16 OS=Homo sapiens OX=9606 GN=KRT16 PE=1 SV=4
90	65	O43707|ACTN4_HUMAN	O43707	ACTN4	HUMAN	277.99	60	46	46	46	37	51599	51437	33329	29000	50	32	100	97	81	78	Carbamidomethylation; Carbamylation; Deamidation (NQ); Oxidation (M); Acetylation (Protein N-term)	104854	Alpha-actinin-4 OS=Homo sapiens OX=9606 GN=ACTN4 PE=1 SV=2
82	49	P13796|PLSL_HUMAN	P13796	PLSL	HUMAN	277.23	66	66	59	50	59	141660	121530	57802	59601	36	29	116	117	74	90	Carbamidomethylation; Carbamylation; Deamidation (NQ); Oxidation (M); Acetylation (Protein N-term)	70289	Plastin-2 OS=Homo sapiens OX=9606 GN=LCP1 PE=1 SV=6
99	31	P06733|ENOA_HUMAN	P06733	ENOA	HUMAN	274.11	70	65	65	68	60	162730	120250	81967	61050	30	30	90	90	65	71	Carbamidomethylation; Carbamylation; Deamidation (NQ); Oxidation (M); Acetylation (Protein N-term)	47169	Alpha-enolase OS=Homo sapiens OX=9606 GN=ENO1 PE=1 SV=2
69	84	P13647|K2C5_HUMAN	P13647	K2C5	HUMAN	273.7	61	48	47	55	56	37814	68271	97025	129680	49	29	76	76	168	155	Carbamidomethylation; Carbamylation; Deamidation (NQ); Oxidation (M); Acetylation (Protein N-term)	62378	Keratin type II cytoskeletal 5 OS=Homo sapiens OX=9606 GN=KRT5 PE=1 SV=3
106	55	P0DMV8|HS71A_HUMAN	P0DMV8	HS71A	HUMAN	272.07	59	48	43	43	50	66304	49191	47552	42309	38	25	85	77	65	65	Carbamidomethylation; Carbamylation; Deamidation (NQ); Oxidation (M); Acetylation (Protein N-term)	70052	Heat shock 70 kDa protein 1A OS=Homo sapiens OX=9606 GN=HSPA1A PE=1 SV=1
106	56	P0DMV9|HS71B_HUMAN	P0DMV9	HS71B	HUMAN	272.07	59	48	43	43	50	66304	49191	47552	42309	38	25	85	77	65	65	Carbamidomethylation; Carbamylation; Deamidation (NQ); Oxidation (M); Acetylation (Protein N-term)	70052	Heat shock 70 kDa protein 1B OS=Homo sapiens OX=9606 GN=HSPA1B PE=1 SV=1
64	39	P00738|HPT_HUMAN	P00738	HPT	HUMAN	271.05	60	60	57	45	43	228590	160970	34507	45426	29	14	219	189	61	55	Carbamidomethylation; Carbamylation; Deamidation (NQ); Oxidation (M); Acetylation (Protein N-term)	45205	Haptoglobin OS=Homo sapiens OX=9606 GN=HP PE=1 SV=1
32	230	P68871|HBB_HUMAN	P68871	HBB	HUMAN	270.5	99	99	99	84	84	381430	303310	57636	53704	19	12	398	426	80	81	Carbamidomethylation; Carbamylation; Deamidation (NQ); Oxidation (M); Acetylation (Protein N-term)	15998	Hemoglobin subunit beta OS=Homo sapiens OX=9606 GN=HBB PE=1 SV=2
78	100	P15311|EZRI_HUMAN	P15311	EZRI	HUMAN	268.19	66	57	58	60	47	164830	123410	75429	58509	46	31	118	121	88	87	Carbamidomethylation; Carbamylation; Deamidation (NQ); Oxidation (M); Acetylation (Protein N-term)	69413	Ezrin OS=Homo sapiens OX=9606 GN=EZR PE=1 SV=4
89	59	P04075|ALDOA_HUMAN	P04075	ALDOA	HUMAN	267.13	63	63	56	56	62	179590	146750	99104	98238	27	23	98	94	79	90	Carbamidomethylation; Carbamylation; Deamidation (NQ)	39420	Fructose-bisphosphate aldolase A OS=Homo sapiens OX=9606 GN=ALDOA PE=1 SV=2
81	54	P29401|TKT_HUMAN	P29401	TKT	HUMAN	266.58	62	50	55	41	44	202970	176420	83962	46979	33	33	147	128	64	59	Carbamidomethylation; Carbamylation; Deamidation (NQ); Oxidation (M); Acetylation (Protein N-term)	67878	Transketolase OS=Homo sapiens OX=9606 GN=TKT PE=1 SV=3
127	44	Q9UBG3|CRNN_HUMAN	Q9UBG3	CRNN	HUMAN	266.55	64	56	43	52	61	102860	48785	111380	131390	24	24	52	55	60	74	Carbamidomethylation; Carbamylation; Deamidation (NQ); Acetylation (Protein N-term)	53533	Cornulin OS=Homo sapiens OX=9606 GN=CRNN PE=1 SV=1
111	62	P08575|PTPRC_HUMAN	P08575	PTPRC	HUMAN	265.44	33	31	25	22	25	86719	61895	32080	35364	39	39	93	75	54	61	Carbamidomethylation; Carbamylation; Deamidation (NQ); Oxidation (M)	147486	Receptor-type tyrosine-protein phosphatase C OS=Homo sapiens OX=9606 GN=PTPRC PE=1 SV=3
73	94	P26038|MOES_HUMAN	P26038	MOES	HUMAN	265.12	67	59	60	56	55	107280	74692	86265	58332	51	38	120	128	80	93	Carbamidomethylation; Carbamylation; Deamidation (NQ); Oxidation (M)	67820	Moesin OS=Homo sapiens OX=9606 GN=MSN PE=1 SV=3
6	564	P01834|IGKC_HUMAN	P01834	IGKC	HUMAN	264.99	93	93	93	74	89	1118600	865660	524530	386030	10	10	1211	1305	739	743	Carbamidomethylation; Carbamylation; Deamidation (NQ); Acetylation (Protein N-term)	11765	Immunoglobulin kappa constant OS=Homo sapiens OX=9606 GN=IGKC PE=1 SV=2
77	68	P22079|PERL_HUMAN	P22079	PERL	HUMAN	263.87	59	38	40	58	53	75374	86623	137810	106220	37	37	79	99	118	119	Carbamidomethylation; Carbamylation; Deamidation (NQ); Oxidation (M); Acetylation (Protein N-term)	80288	Lactoperoxidase OS=Homo sapiens OX=9606 GN=LPO PE=1 SV=2
160	112	P02751|FINC_HUMAN	P02751	FINC	HUMAN	261.25	25	23	21	3	2	86720	55423	4307.6	1944.3	54	54	90	79	8	6	Carbamidomethylation; Carbamylation; Deamidation (NQ); Oxidation (M); Acetylation (Protein N-term)	272318	Fibronectin OS=Homo sapiens OX=9606 GN=FN1 PE=1 SV=5
269	93	P35555|FBN1_HUMAN	P35555	FBN1	HUMAN	259.33	17	16	11	0	0	37225	23949			44	41	55	39	0	0	Carbamidomethylation; Carbamylation; Deamidation (NQ); Acetylation (Protein N-term)	312297	Fibrillin-1 OS=Homo sapiens OX=9606 GN=FBN1 PE=1 SV=4
175	81	P02787|TRFE_HUMAN	P02787	TRFE	HUMAN	258.7	48	48	41	19	16	96792	56758	10635	7457	38	38	82	60	17	14	Carbamidomethylation; Carbamylation; Deamidation (NQ); Oxidation (M)	77064	Serotransferrin OS=Homo sapiens OX=9606 GN=TF PE=1 SV=3
102	58	P06396|GELS_HUMAN	P06396	GELS	HUMAN	257.16	38	29	35	28	27	155040	153740	75108	67800	30	30	97	83	59	68	Carbamidomethylation; Carbamylation; Deamidation (NQ); Oxidation (M); Acetylation (Protein N-term)	85697	Gelsolin OS=Homo sapiens OX=9606 GN=GSN PE=1 SV=1
116	60	P11142|HSP7C_HUMAN	P11142	HSP7C	HUMAN	256.43	52	50	40	39	32	80958	63729	37971	23543	31	24	77	82	57	47	Carbamidomethylation; Carbamylation; Deamidation (NQ); Oxidation (M)	70898	Heat shock cognate 71 kDa protein OS=Homo sapiens OX=9606 GN=HSPA8 PE=1 SV=1
87	63	Q08380|LG3BP_HUMAN	Q08380	LG3BP	HUMAN	256.31	44	36	41	38	42	182330	164500	100080	91053	20	20	108	104	73	84	Carbamidomethylation; Carbamylation; Deamidation (NQ)	65331	Galectin-3-binding protein OS=Homo sapiens OX=9606 GN=LGALS3BP PE=1 SV=1
149	132	P46940|IQGA1_HUMAN	P46940	IQGA1	HUMAN	255.37	35	24	24	20	21	47778	37680	18759	22995	50	50	55	59	40	46	Carbamidomethylation; Carbamylation; Deamidation (NQ); Acetylation (Protein N-term)	189251	Ras GTPase-activating-like protein IQGAP1 OS=Homo sapiens OX=9606 GN=IQGAP1 PE=1 SV=1
94	72	P07355|ANXA2_HUMAN	P07355	ANXA2	HUMAN	255.33	71	71	68	61	58	134830	113550	107230	82314	29	29	86	94	91	71	Carbamidomethylation; Carbamylation; Deamidation (NQ); Oxidation (M); Acetylation (Protein N-term)	38604	Annexin A2 OS=Homo sapiens OX=9606 GN=ANXA2 PE=1 SV=2
79	57	P12429|ANXA3_HUMAN	P12429	ANXA3	HUMAN	255.33	64	55	62	64	60	133430	128650	175310	161410	24	24	78	85	127	119	Carbamidomethylation; Carbamylation; Deamidation (NQ); Oxidation (M); Acetylation (Protein N-term)	36375	Annexin A3 OS=Homo sapiens OX=9606 GN=ANXA3 PE=1 SV=3
179	110	Q00610|CLH1_HUMAN	Q00610	CLH1	HUMAN	254.77	32	22	17	19	20	33060	28772	22862	23770	46	46	52	42	36	40	Carbamidomethylation; Deamidation (NQ)	191613	Clathrin heavy chain 1 OS=Homo sapiens OX=9606 GN=CLTC PE=1 SV=5
96	61	P30740|ILEU_HUMAN	P30740	ILEU	HUMAN	254.23	63	63	59	55	50	116040	113520	84015	64324	25	24	83	91	77	78	Carbamylation; Deamidation (NQ); Oxidation (M); Acetylation (Protein N-term)	42742	Leukocyte elastase inhibitor OS=Homo sapiens OX=9606 GN=SERPINB1 PE=1 SV=1
173	70	P31146|COR1A_HUMAN	P31146	COR1A	HUMAN	253.01	57	52	57	48	38	110150	99220	47204	62699	25	24	51	52	41	33	Carbamidomethylation; Carbamylation; Deamidation (NQ); Oxidation (M)	51026	Coronin-1A OS=Homo sapiens OX=9606 GN=CORO1A PE=1 SV=4
92	92	P27487|DPP4_HUMAN	P27487	DPP4	HUMAN	251.98	47	44	43	39	32	167730	139320	86941	91500	38	38	97	109	75	66	Carbamidomethylation; Carbamylation; Deamidation (NQ); Oxidation (M)	88279	Dipeptidyl peptidase 4 OS=Homo sapiens OX=9606 GN=DPP4 PE=1 SV=2
85	75	P04406|G3P_HUMAN	P04406	G3P	HUMAN	251.61	72	65	70	69	56	180870	147460	124020	100830	22	22	114	101	86	79	Carbamidomethylation; Carbamylation; Deamidation (NQ); Oxidation (M); Acetylation (Protein N-term)	36053	Glyceraldehyde-3-phosphate dehydrogenase OS=Homo sapiens OX=9606 GN=GAPDH PE=1 SV=3
124	74	P41218|MNDA_HUMAN	P41218	MNDA	HUMAN	251.45	49	48	49	49	42	81003	70363	74253	57581	26	26	59	65	65	57	Carbamidomethylation; Carbamylation; Deamidation (NQ); Oxidation (M)	45836	Myeloid cell nuclear differentiation antigen OS=Homo sapiens OX=9606 GN=MNDA PE=1 SV=1
110	69	P29508|SPB3_HUMAN	P29508	SPB3	HUMAN	251.26	64	56	52	57	56	27745	22529	18802	17926	28	11	69	73	71	73	Carbamylation; Deamidation (NQ); Oxidation (M); Acetylation (Protein N-term)	44565	Serpin B3 OS=Homo sapiens OX=9606 GN=SERPINB3 PE=1 SV=2
47	91	P01860|IGHG3_HUMAN	P01860	IGHG3	HUMAN	251.25	53	48	48	51	50	27779	23419	38700	29329	20	6	183	198	163	169	Carbamidomethylation; Carbamylation; Deamidation (NQ); Oxidation (M); Acetylation (Protein N-term)	41287	Immunoglobulin heavy constant gamma 3 OS=Homo sapiens OX=9606 GN=IGHG3 PE=1 SV=2
163	106	P15144|AMPN_HUMAN	P15144	AMPN	HUMAN	251.24	31	27	30	23	21	56684	64998	25469	20802	33	33	55	53	34	40	Carbamidomethylation; Deamidation (NQ); Oxidation (M)	109539	Aminopeptidase N OS=Homo sapiens OX=9606 GN=ANPEP PE=1 SV=4
18	477	P0DOY3|IGLC3_HUMAN	P0DOY3	IGLC3	HUMAN	250.05	96	96	93	93	93	92815	78766	46302	23912	12	5	371	391	291	330	Carbamidomethylation; Carbamylation; Deamidation (NQ); Acetylation (Protein N-term)	11266	Immunoglobulin lambda constant 3 OS=Homo sapiens OX=9606 GN=IGLC3 PE=1 SV=1
195	77	Q01518|CAP1_HUMAN	Q01518	CAP1	HUMAN	249.78	55	44	45	39	42	62337	57097	27042	25256	24	24	45	47	27	30	Carbamidomethylation; Carbamylation; Deamidation (NQ); Oxidation (M); Acetylation (Protein N-term)	51902	Adenylyl cyclase-associated protein 1 OS=Homo sapiens OX=9606 GN=CAP1 PE=1 SV=5
114	64	Q02413|DSG1_HUMAN	Q02413	DSG1	HUMAN	249.41	22	17	18	20	21	49987	51519	68227	71505	21	20	48	47	84	93	Carbamidomethylation; Carbamylation; Deamidation (NQ); Oxidation (M)	113748	Desmoglein-1 OS=Homo sapiens OX=9606 GN=DSG1 PE=1 SV=2
93	151	P27105|STOM_HUMAN	P27105	STOM	HUMAN	248.79	59	59	57	57	57	146140	102860	122520	96359	18	17	87	85	87	86	Carbamidomethylation; Carbamylation; Deamidation (NQ); Oxidation (M); Acetylation (Protein N-term)	31731	Stomatin OS=Homo sapiens OX=9606 GN=STOM PE=1 SV=3
154	191	P80723|BASP1_HUMAN	P80723	BASP1	HUMAN	248.78	89	89	83	74	81	89094	53561	46233	41686	18	18	43	58	42	45	Carbamylation; Deamidation (NQ); Acetylation (Protein N-term)	22693	Brain acid soluble protein 1 OS=Homo sapiens OX=9606 GN=BASP1 PE=1 SV=2
156	83	O00391|QSOX1_HUMAN	O00391	QSOX1	HUMAN	248.63	39	14	12	35	35	13330	5579.9	64161	81794	28	27	14	12	76	85	Carbamidomethylation; Carbamylation; Deamidation (NQ); Acetylation (Protein N-term)	82578	Sulfhydryl oxidase 1 OS=Homo sapiens OX=9606 GN=QSOX1 PE=1 SV=3
192	105	Q09666|AHNK_HUMAN	Q09666	AHNK	HUMAN	248.46	12	6	6	7	6	21512	17661	13100	14700	53	53	41	37	39	33	Carbamidomethylation; Carbamylation; Deamidation (NQ); Oxidation (M); Acetylation (Protein N-term)	629114	Neuroblast differentiation-associated protein AHNAK OS=Homo sapiens OX=9606 GN=AHNAK PE=1 SV=2
49	138	P08311|CATG_HUMAN	P08311	CATG	HUMAN	246.71	65	55	64	55	56	250400	231880	403910	273120	20	20	133	165	167	189	Carbamidomethylation; Carbamylation; Deamidation (NQ); Oxidation (M); Acetylation (Protein N-term)	28837	Cathepsin G OS=Homo sapiens OX=9606 GN=CTSG PE=1 SV=2
128	96	P06737|PYGL_HUMAN	P06737	PYGL	HUMAN	246.61	46	42	41	32	34	63673	48981	28785	18772	41	36	76	75	45	42	Carbamidomethylation; Carbamylation; Deamidation (NQ); Oxidation (M); Acetylation (Protein N-term)	97149	Glycogen phosphorylase liver form OS=Homo sapiens OX=9606 GN=PYGL PE=1 SV=4
105	66	P52209|6PGD_HUMAN	P52209	6PGD	HUMAN	245.25	58	55	43	39	39	135240	102340	102890	93304	26	26	75	63	82	74	Carbamidomethylation; Carbamylation; Deamidation (NQ); Oxidation (M); Acetylation (Protein N-term)	53140	6-phosphogluconate dehydrogenase decarboxylating OS=Homo sapiens OX=9606 GN=PGD PE=1 SV=3
125	90	P63104|1433Z_HUMAN	P63104	1433Z	HUMAN	244.5	77	77	77	73	73	85991	99677	74800	75042	22	16	65	57	66	58	Carbamidomethylation; Carbamylation; Deamidation (NQ); Oxidation (M); Acetylation (Protein N-term)	27745	14-3-3 protein zeta/delta OS=Homo sapiens OX=9606 GN=YWHAZ PE=1 SV=1
214	170	P15924|DESP_HUMAN	P15924	DESP	HUMAN	244.44	20	6	4	13	14	12407	16378	51330	58045	57	57	20	13	51	47	Carbamidomethylation; Carbamylation; Deamidation (NQ); Acetylation (Protein N-term)	331774	Desmoplakin OS=Homo sapiens OX=9606 GN=DSP PE=1 SV=3
30	318	P69905|HBA_HUMAN	P69905	HBA	HUMAN	244.14	98	95	78	72	42	706860	563390	74385	75554	18	18	466	457	72	51	Carbamidomethylation; Carbamylation; Deamidation (NQ); Oxidation (M); Acetylation (Protein N-term)	15258	Hemoglobin subunit alpha OS=Homo sapiens OX=9606 GN=HBA1 PE=1 SV=2
45	391	P06702|S10A9_HUMAN	P06702	S10A9	HUMAN	243.97	89	85	86	89	89	268030	221210	283170	271850	14	14	148	145	214	219	Carbamylation; Deamidation (NQ); Oxidation (M)	13242	Protein S100-A9 OS=Homo sapiens OX=9606 GN=S100A9 PE=1 SV=1
58	364	P03973|SLPI_HUMAN	P03973	SLPI	HUMAN	243.75	69	67	67	50	67	215840	195080	323320	417110	15	15	78	88	193	186	Carbamidomethylation; Carbamylation; Deamidation (NQ); Oxidation (M); Acetylation (Protein N-term)	14326	Antileukoproteinase OS=Homo sapiens OX=9606 GN=SLPI PE=1 SV=2
212	113	P18206|VINC_HUMAN	P18206	VINC	HUMAN	242.88	41	31	26	21	19	33920	35496	15648	14017	41	41	41	43	22	26	Carbamidomethylation; Carbamylation; Deamidation (NQ); Oxidation (M)	123799	Vinculin OS=Homo sapiens OX=9606 GN=VCL PE=1 SV=4
104	117	Q04695|K1C17_HUMAN	Q04695	K1C17	HUMAN	242.76	47	37	31	43	44	2325.2	1626.7	6211.4	7456.5	25	8	43	51	100	106	Carbamidomethylation; Carbamylation; Deamidation (NQ); Oxidation (M)	48106	Keratin type I cytoskeletal 17 OS=Homo sapiens OX=9606 GN=KRT17 PE=1 SV=2
129	201	Q9UBC9|SPRR3_HUMAN	Q9UBC9	SPRR3	HUMAN	242.31	89	89	76	85	89	54378	40270	112980	119420	24	24	55	40	70	71	Carbamidomethylation; Carbamylation; Deamidation (NQ); Acetylation (Protein N-term)	18154	Small proline-rich protein 3 OS=Homo sapiens OX=9606 GN=SPRR3 PE=1 SV=2
101	76	P04899|GNAI2_HUMAN	P04899	GNAI2	HUMAN	241.86	69	56	65	54	58	47208	42206	27986	26090	23	16	80	77	74	77	Carbamidomethylation; Carbamylation; Deamidation (NQ); Oxidation (M)	40451	Guanine nucleotide-binding protein G(i) subunit alpha-2 OS=Homo sapiens OX=9606 GN=GNAI2 PE=1 SV=3
183	80	P60174|TPIS_HUMAN	P60174	TPIS	HUMAN	241.24	90	67	67	73	82	44726	35143	130740	64146	17	17	30	32	59	45	Carbamidomethylation; Carbamylation; Deamidation (NQ)	26669	Triosephosphate isomerase OS=Homo sapiens OX=9606 GN=TPI1 PE=1 SV=4
26	439	B9A064|IGLL5_HUMAN	B9A064	IGLL5	HUMAN	241.22	50	50	50	50	47	105860	50580	59786	59552	11	5	287	313	250	269	Carbamidomethylation; Carbamylation; Deamidation (NQ); Acetylation (Protein N-term)	23063	Immunoglobulin lambda-like polypeptide 5 OS=Homo sapiens OX=9606 GN=IGLL5 PE=2 SV=2
168	149	P35749|MYH11_HUMAN	P35749	MYH11	HUMAN	240.61	10	8	8	8	9	0			3375.8	22	3	57	51	35	36	Carbamidomethylation; Carbamylation; Deamidation (NQ); Oxidation (M); Acetylation (Protein N-term)	227337	Myosin-11 OS=Homo sapiens OX=9606 GN=MYH11 PE=1 SV=3
97	325	P07737|PROF1_HUMAN	P07737	PROF1	HUMAN	240.08	94	94	93	91	93	176500	165380	112890	108700	16	16	83	96	78	70	Carbamidomethylation; Carbamylation; Deamidation (NQ); Oxidation (M); Acetylation (Protein N-term)	15054	Profilin-1 OS=Homo sapiens OX=9606 GN=PFN1 PE=1 SV=2
23	327	P01591|IGJ_HUMAN	P01591	IGJ	HUMAN	239.13	77	77	77	72	72	588290	466020	317020	248870	15	15	312	394	251	242	Carbamidomethylation; Carbamylation; Deamidation (NQ); Oxidation (M); Acetylation (Protein N-term)	18099	Immunoglobulin J chain OS=Homo sapiens OX=9606 GN=JCHAIN PE=1 SV=4
181	99	P50995|ANX11_HUMAN	P50995	ANX11	HUMAN	237.25	46	41	44	40	39	53488	33150	32668	34909	26	25	43	38	42	43	Carbamidomethylation; Carbamylation; Deamidation (NQ); Oxidation (M)	54390	Annexin A11 OS=Homo sapiens OX=9606 GN=ANXA11 PE=1 SV=1
38	123	P01859|IGHG2_HUMAN	P01859	IGHG2	HUMAN	236.25	70	70	70	57	42	50007	49817	18439	16503	19	10	251	288	153	128	Carbamidomethylation; Carbamylation; Deamidation (NQ); Oxidation (M); Acetylation (Protein N-term)	35901	Immunoglobulin heavy constant gamma 2 OS=Homo sapiens OX=9606 GN=IGHG2 PE=1 SV=2
224	87	P14780|MMP9_HUMAN	P14780	MMP9	HUMAN	235.42	47	37	42	24	25	49036	54901	19627	16400	26	26	36	48	18	20	Carbamidomethylation; Carbamylation; Deamidation (NQ); Oxidation (M)	78458	Matrix metalloproteinase-9 OS=Homo sapiens OX=9606 GN=MMP9 PE=1 SV=3
153	142	P35580|MYH10_HUMAN	P35580	MYH10	HUMAN	235.35	11	9	10	7	9		0		1473.6	25	2	57	63	33	41	Carbamidomethylation; Carbamylation; Deamidation (NQ); Oxidation (M); Acetylation (Protein N-term)	228997	Myosin-10 OS=Homo sapiens OX=9606 GN=MYH10 PE=1 SV=3
141	82	P06744|G6PI_HUMAN	P06744	G6PI	HUMAN	234.71	50	50	50	32	29	128860	100260	38990	34687	24	24	76	65	38	38	Carbamidomethylation; Carbamylation; Deamidation (NQ); Oxidation (M); Acetylation (Protein N-term)	63147	Glucose-6-phosphate isomerase OS=Homo sapiens OX=9606 GN=GPI PE=1 SV=4
142	171	P31947|1433S_HUMAN	P31947	1433S	HUMAN	233.3	63	52	60	60	63	64810	45832	39423	38165	18	13	50	49	58	57	Carbamidomethylation; Carbamylation; Deamidation (NQ); Oxidation (M); Acetylation (Protein N-term)	27774	14-3-3 protein sigma OS=Homo sapiens OX=9606 GN=SFN PE=1 SV=1
56	200	P01861|IGHG4_HUMAN	P01861	IGHG4	HUMAN	232.95	55	46	43	51	51	54261	24458	23399	10320	14	6	158	154	120	126	Carbamidomethylation; Carbamylation; Deamidation (NQ); Oxidation (M); Acetylation (Protein N-term)	35941	Immunoglobulin heavy constant gamma 4 OS=Homo sapiens OX=9606 GN=IGHG4 PE=1 SV=1
203	129	P13639|EF2_HUMAN	P13639	EF2	HUMAN	231.22	38	31	32	30	28	32180	35132	28524	23407	29	29	36	37	33	35	Carbamidomethylation; Carbamylation; Deamidation (NQ)	95338	Elongation factor 2 OS=Homo sapiens OX=9606 GN=EEF2 PE=1 SV=4
76	270	Q562R1|ACTBL_HUMAN	Q562R1	ACTBL	HUMAN	230.93	36	30	23	27	24	48215	34030	21268	21954	14	3	130	112	93	83	Carbamidomethylation; Carbamylation; Deamidation (NQ); Oxidation (M); Acetylation (Protein N-term)	42003	Beta-actin-like protein 2 OS=Homo sapiens OX=9606 GN=ACTBL2 PE=1 SV=2
223	97	P04040|CATA_HUMAN	P04040	CATA	HUMAN	229.61	44	39	43	24	25	73123	41143	13982	17163	25	25	40	46	16	20	Carbamidomethylation; Carbamylation; Deamidation (NQ); Oxidation (M); Acetylation (Protein N-term)	59756	Catalase OS=Homo sapiens OX=9606 GN=CAT PE=1 SV=3
237	89	P00450|CERU_HUMAN	P00450	CERU	HUMAN	229.51	28	25	25	13	15	58060	25997	9885.6	7068.1	23	23	40	35	18	16	Carbamidomethylation; Carbamylation; Deamidation (NQ); Oxidation (M)	122205	Ceruloplasmin OS=Homo sapiens OX=9606 GN=CP PE=1 SV=1
63	231	P02042|HBD_HUMAN	P02042	HBD	HUMAN	228.04	95	95	86	56	61	32556	11294	2061.6	3267.6	14	7	218	227	44	44	Carbamidomethylation; Carbamylation; Deamidation (NQ); Oxidation (M); Acetylation (Protein N-term)	16055	Hemoglobin subunit delta OS=Homo sapiens OX=9606 GN=HBD PE=1 SV=2
115	159	Q6P5S2|LEG1H_HUMAN	Q6P5S2	LEG1H	HUMAN	227.98	48	28	30	48	48	37331	29542	253190	240860	16	16	19	18	107	127	Carbamidomethylation; Carbamylation; Deamidation (NQ); Oxidation (M); Acetylation (Protein N-term)	37926	Protein LEG1 homolog OS=Homo sapiens OX=9606 GN=LEG1 PE=1 SV=2
135	363	P16403|H12_HUMAN	P16403	H12	HUMAN	227.46	43	32	33	40	38	4823.2	8435.3	13508	5002.8	15	4	38	43	72	73	Carbamylation; Deamidation (NQ); Acetylation (Protein N-term)	21365	Histone H1.2 OS=Homo sapiens OX=9606 GN=H1-2 PE=1 SV=2
40	484	P12273|PIP_HUMAN	P12273	PIP	HUMAN	227.41	70	70	70	63	63	227340	205450	188960	201110	10	10	168	195	203	196	Carbamidomethylation; Carbamylation; Deamidation (NQ); Acetylation (Protein N-term)	16572	Prolactin-inducible protein OS=Homo sapiens OX=9606 GN=PIP PE=1 SV=1
182	109	P48594|SPB4_HUMAN	P48594	SPB4	HUMAN	227.36	43	38	38	43	41	989.71	1887	2029.6	2839	20	3	35	38	47	46	Carbamidomethylation; Carbamylation; Deamidation (NQ); Oxidation (M); Acetylation (Protein N-term)	44854	Serpin B4 OS=Homo sapiens OX=9606 GN=SERPINB4 PE=1 SV=2
189	108	Q16610|ECM1_HUMAN	Q16610	ECM1	HUMAN	227.03	59	33	38	42	49	28816	34675	27403	32885	25	25	38	35	43	43	Carbamidomethylation; Carbamylation; Deamidation (NQ); Oxidation (M)	60674	Extracellular matrix protein 1 OS=Homo sapiens OX=9606 GN=ECM1 PE=1 SV=2
199	98	P07900|HS90A_HUMAN	P07900	HS90A	HUMAN	226.35	42	36	30	29	21	19973	24370	13371	13346	27	15	45	34	27	38	Carbamidomethylation; Carbamylation; Deamidation (NQ)	84660	Heat shock protein HSP 90-alpha OS=Homo sapiens OX=9606 GN=HSP90AA1 PE=1 SV=5
145	195	P00739|HPTR_HUMAN	P00739	HPTR	HUMAN	224.69	38	38	34	25	23	1007.3	358.52			17	2	86	70	25	29	Carbamidomethylation; Carbamylation; Deamidation (NQ)	39030	Haptoglobin-related protein OS=Homo sapiens OX=9606 GN=HPR PE=2 SV=2
331	216	Q6UWP8|SBSN_HUMAN	Q6UWP8	SBSN	HUMAN	224.14	30	28	25	20	19	11107	8147.4	11394	9726.9	13	13	19	18	19	16	Carbamylation; Deamidation (NQ)	60541	Suprabasin OS=Homo sapiens OX=9606 GN=SBSN PE=1 SV=2
166	184	Q6UX06|OLFM4_HUMAN	Q6UX06	OLFM4	HUMAN	223.74	32	32	32	27	26	98530	69265	24885	20306	17	17	71	57	31	23	Carbamidomethylation; Carbamylation; Deamidation (NQ); Oxidation (M); Acetylation (Protein N-term)	57280	Olfactomedin-4 OS=Homo sapiens OX=9606 GN=OLFM4 PE=1 SV=1
126	203	P62879|GBB2_HUMAN	P62879	GBB2	HUMAN	223.37	52	44	41	52	45	18480	15181	16804	14506	15	6	58	56	59	72	Carbamidomethylation; Carbamylation; Deamidation (NQ); Oxidation (M); Acetylation (Protein N-term)	37331	Guanine nucleotide-binding protein G(I)/G(S)/G(T) subunit beta-2 OS=Homo sapiens OX=9606 GN=GNB2 PE=1 SV=3
150	381	P10412|H14_HUMAN	P10412	H14	HUMAN	222.83	38	31	32	35	38	7071.3	6329.3	7672.7	8450.8	14	3	32	37	59	72	Carbamylation; Deamidation (NQ); Acetylation (Protein N-term)	21865	Histone H1.4 OS=Homo sapiens OX=9606 GN=H1-4 PE=1 SV=2
138	122	P01009|A1AT_HUMAN	P01009	A1AT	HUMAN	222.73	57	37	31	44	41	51683	26094	96345	67379	24	24	41	31	77	75	Carbamidomethylation; Carbamylation; Deamidation (NQ); Oxidation (M)	46737	Alpha-1-antitrypsin OS=Homo sapiens OX=9606 GN=SERPINA1 PE=1 SV=3
131	228	P62873|GBB1_HUMAN	P62873	GBB1	HUMAN	222.07	46	44	39	46	45	21055	23993	25381	26694	15	8	56	47	56	72	Carbamidomethylation; Carbamylation; Deamidation (NQ); Oxidation (M); Acetylation (Protein N-term)	37377	Guanine nucleotide-binding protein G(I)/G(S)/G(T) subunit beta-1 OS=Homo sapiens OX=9606 GN=GNB1 PE=1 SV=3
245	124	P61158|ARP3_HUMAN	P61158	ARP3	HUMAN	221.49	53	41	48	51	31	39785	26963	18810	19714	18	18	24	33	29	17	Carbamidomethylation; Deamidation (NQ); Oxidation (M)	47371	Actin-related protein 3 OS=Homo sapiens OX=9606 GN=ACTR3 PE=1 SV=3
196	103	P32926|DSG3_HUMAN	P32926	DSG3	HUMAN	221.35	22	16	18	15	18	45114	30582	31545	27269	19	18	39	43	31	35	Carbamidomethylation; Carbamylation; Deamidation (NQ); Oxidation (M)	107533	Desmoglein-3 OS=Homo sapiens OX=9606 GN=DSG3 PE=1 SV=2
283	125	Q14697|GANAB_HUMAN	Q14697	GANAB	HUMAN	220.87	21	19	16	12	11	21012	12056	8956.4	5947.5	21	21	36	27	15	12	Carbamidomethylation	106874	Neutral alpha-glucosidase AB OS=Homo sapiens OX=9606 GN=GANAB PE=1 SV=3
176	88	P00558|PGK1_HUMAN	P00558	PGK1	HUMAN	220.8	62	52	50	47	53	51978	51969	34458	36826	23	23	47	45	37	44	Carbamidomethylation; Deamidation (NQ); Acetylation (Protein N-term)	44615	Phosphoglycerate kinase 1 OS=Homo sapiens OX=9606 GN=PGK1 PE=1 SV=3
299	130	Q01082|SPTB2_HUMAN	Q01082	SPTB2	HUMAN	220.67	16	12	10	4	4	13206	9039.7	4292.4	3413	31	31	33	25	12	13	Carbamidomethylation; Deamidation (NQ)	274608	Spectrin beta chain non-erythrocytic 1 OS=Homo sapiens OX=9606 GN=SPTBN1 PE=1 SV=2
28	317	Q96DA0|ZG16B_HUMAN	Q96DA0	ZG16B	HUMAN	220.2	57	57	57	57	57	318000	166900	365360	297530	10	10	210	205	335	313	Carbamylation; Deamidation (NQ); Oxidation (M); Acetylation (Protein N-term)	22739	Zymogen granule protein 16 homolog B OS=Homo sapiens OX=9606 GN=ZG16B PE=1 SV=3
332	115	P22735|TGM1_HUMAN	P22735	TGM1	HUMAN	218.76	29	26	24	9	13	26279	13984	4672.2	11907	23	23	26	28	7	11	Deamidation (NQ)	89787	Protein-glutamine gamma-glutamyltransferase K OS=Homo sapiens OX=9606 GN=TGM1 PE=1 SV=4
75	213	P23280|CAH6_HUMAN	P23280	CAH6	HUMAN	217.69	57	50	40	47	43	140060	170240	129950	126960	15	15	79	126	115	102	Carbamidomethylation; Carbamylation; Deamidation (NQ); Oxidation (M); Acetylation (Protein N-term)	35367	Carbonic anhydrase 6 OS=Homo sapiens OX=9606 GN=CA6 PE=1 SV=3
143	131	P00338|LDHA_HUMAN	P00338	LDHA	HUMAN	217.67	59	49	43	52	51	100740	73116	41489	47342	20	19	55	64	50	43	Carbamidomethylation; Carbamylation; Deamidation (NQ); Oxidation (M); Acetylation (Protein N-term)	36689	L-lactate dehydrogenase A chain OS=Homo sapiens OX=9606 GN=LDHA PE=1 SV=2
137	279	P12035|K2C3_HUMAN	P12035	K2C3	HUMAN	217.58	18	13	12	18	12			2123.6		17	2	36	43	76	69	Carbamylation; Deamidation (NQ); Oxidation (M); Acetylation (Protein N-term)	64417	Keratin type II cytoskeletal 3 OS=Homo sapiens OX=9606 GN=KRT3 PE=1 SV=3
232	95	P08238|HS90B_HUMAN	P08238	HS90B	HUMAN	217.38	36	31	22	22	23	20460	3911	8377.8	11300	23	12	37	23	19	34	Carbamidomethylation; Carbamylation; Deamidation (NQ)	83264	Heat shock protein HSP 90-beta OS=Homo sapiens OX=9606 GN=HSP90AB1 PE=1 SV=4
53	331	P61626|LYSC_HUMAN	P61626	LYSC	HUMAN	216.61	69	64	69	69	69	406270	375590	222180	232070	12	12	144	179	132	131	Carbamidomethylation; Carbamylation; Deamidation (NQ); Oxidation (M); Acetylation (Protein N-term)	16537	Lysozyme C OS=Homo sapiens OX=9606 GN=LYZ PE=1 SV=1
200	104	P68371|TBB4B_HUMAN	P68371	TBB4B	HUMAN	216.28	57	42	30	35	49	3793.5	3092	3378.5	2671.5	21	2	33	26	41	44	Carbamidomethylation; Carbamylation; Deamidation (NQ); Oxidation (M)	49831	Tubulin beta-4B chain OS=Homo sapiens OX=9606 GN=TUBB4B PE=1 SV=1
178	306	P61586|RHOA_HUMAN	P61586	RHOA	HUMAN	216.1	67	60	52	52	67	73759	55971	54220	52011	15	13	36	52	33	49	Carbamidomethylation; Carbamylation; Deamidation (NQ); Oxidation (M)	21768	Transforming protein RhoA OS=Homo sapiens OX=9606 GN=RHOA PE=1 SV=1
169	162	P05787|K2C8_HUMAN	P05787	K2C8	HUMAN	215.81	55	47	45	10	10	25459	26425			33	24	48	51	39	40	Carbamylation; Deamidation (NQ); Acetylation (Protein N-term)	53704	Keratin type II cytoskeletal 8 OS=Homo sapiens OX=9606 GN=KRT8 PE=1 SV=7
207	234	O00299|CLIC1_HUMAN	O00299	CLIC1	HUMAN	215.66	66	66	60	65	61	48768	44758	39545	40971	15	15	41	30	33	34	Carbamidomethylation; Carbamylation; Deamidation (NQ); Acetylation (Protein N-term)	26923	Chloride intracellular channel protein 1 OS=Homo sapiens OX=9606 GN=CLIC1 PE=1 SV=4
52	485	P05109|S10A8_HUMAN	P05109	S10A8	HUMAN	215.58	91	86	85	90	86	321690	263710	278060	257470	16	16	111	116	180	191	Carbamidomethylation; Carbamylation; Deamidation (NQ); Oxidation (M); Acetylation (Protein N-term)	10835	Protein S100-A8 OS=Homo sapiens OX=9606 GN=S100A8 PE=1 SV=1
152	298	P16401|H15_HUMAN	P16401	H15	HUMAN	214.94	41	31	30	35	41	36976	44411	77562	61678	15	12	38	31	65	62	Carbamylation; Deamidation (NQ); Acetylation (Protein N-term)	22580	Histone H1.5 OS=Homo sapiens OX=9606 GN=H1-5 PE=1 SV=3
215	362	P26583|HMGB2_HUMAN	P26583	HMGB2	HUMAN	214.83	47	39	33	33	42	77635	21875	29991	9875.7	15	13	38	31	27	35	Carbamidomethylation; Deamidation (NQ); Oxidation (M)	24034	High mobility group protein B2 OS=Homo sapiens OX=9606 GN=HMGB2 PE=1 SV=2
121	168	P08727|K1C19_HUMAN	P08727	K1C19	HUMAN	214.62	56	49	44	20	20	16135	15027			26	15	50	48	77	77	Carbamylation; Deamidation (NQ); Oxidation (M)	44106	Keratin type I cytoskeletal 19 OS=Homo sapiens OX=9606 GN=KRT19 PE=1 SV=4
307	143	P04003|C4BPA_HUMAN	P04003	C4BPA	HUMAN	214.38	28	27	22	24	19	27961	14541	23775	18675	15	15	20	18	22	22	Carbamidomethylation; Carbamylation; Deamidation (NQ); Acetylation (Protein N-term)	67033	C4b-binding protein alpha chain OS=Homo sapiens OX=9606 GN=C4BPA PE=1 SV=2
261	111	P07996|TSP1_HUMAN	P07996	TSP1	HUMAN	213.66	25	19	17	12	13	18568	13019	5464.3	11547	23	23	28	29	20	19	Carbamidomethylation; Deamidation (NQ)	129383	Thrombospondin-1 OS=Homo sapiens OX=9606 GN=THBS1 PE=1 SV=2
306	119	P22314|UBA1_HUMAN	P22314	UBA1	HUMAN	213.66	24	21	19	14	17	16651	13698	8199.3	4971.8	19	19	26	23	17	15	Carbamidomethylation; Deamidation (NQ)	117849	Ubiquitin-like modifier-activating enzyme 1 OS=Homo sapiens OX=9606 GN=UBA1 PE=1 SV=3
193	107	P07437|TBB5_HUMAN	P07437	TBB5	HUMAN	213.63	53	45	37	31	42	3123.5	2757.4	0	0	20	2	37	34	38	41	Carbamidomethylation; Carbamylation; Deamidation (NQ); Oxidation (M)	49671	Tubulin beta chain OS=Homo sapiens OX=9606 GN=TUBB PE=1 SV=2
247	120	P09960|LKHA4_HUMAN	P09960	LKHA4	HUMAN	213.51	42	36	40	18	13	44228	33050	6561.6	6238.1	22	22	44	32	16	10	Carbamidomethylation; Carbamylation; Deamidation (NQ); Oxidation (M)	69285	Leukotriene A-4 hydrolase OS=Homo sapiens OX=9606 GN=LTA4H PE=1 SV=2
262	114	Q9H4M9|EHD1_HUMAN	Q9H4M9	EHD1	HUMAN	213.33	52	44	34	20	26	23268	17539	9774.7	6600.2	23	18	36	27	16	17	Carbamidomethylation; Deamidation (NQ)	60627	EH domain-containing protein 1 OS=Homo sapiens OX=9606 GN=EHD1 PE=1 SV=2
258	116	P52790|HXK3_HUMAN	P52790	HXK3	HUMAN	212.77	27	25	25	19	15	24520	15573	6786.6	9017.1	21	20	30	30	21	16	Carbamidomethylation; Deamidation (NQ); Acetylation (Protein N-term)	99025	Hexokinase-3 OS=Homo sapiens OX=9606 GN=HK3 PE=1 SV=2
39	429	P62805|H4_HUMAN	P62805	H4	HUMAN	212.67	62	62	62	62	62	333670	287720	320380	282930	12	12	162	184	228	216	Carbamylation; Deamidation (NQ); Oxidation (M); Acetylation (Protein N-term)	11367	Histone H4 OS=Homo sapiens OX=9606 GN=H4C1 PE=1 SV=2
155	174	P04839|CY24B_HUMAN	P04839	CY24B	HUMAN	212.15	34	25	24	24	23	69819	62086	61972	44303	18	17	52	48	38	49	Carbamidomethylation; Carbamylation; Deamidation (NQ); Oxidation (M)	65336	Cytochrome b-245 heavy chain OS=Homo sapiens OX=9606 GN=CYBB PE=1 SV=2
228	157	O75923|DYSF_HUMAN	O75923	DYSF	HUMAN	212.02	21	15	10	12	12	18127	14123	13739	10121	35	34	36	24	29	27	Carbamidomethylation; Deamidation (NQ)	237293	Dysferlin OS=Homo sapiens OX=9606 GN=DYSF PE=1 SV=1
208	235	Q7Z406|MYH14_HUMAN	Q7Z406	MYH14	HUMAN	211.72	7	5	7	5	6	815.15	1084.3	0	450.6	16	4	42	44	21	29	Carbamidomethylation; Carbamylation; Deamidation (NQ); Acetylation (Protein N-term)	227868	Myosin-14 OS=Homo sapiens OX=9606 GN=MYH14 PE=1 SV=2
109	232	Q8N4F0|BPIB2_HUMAN	Q8N4F0	BPIB2	HUMAN	211.59	33	31	33	25	25	83846	60574	54196	40029	12	12	77	83	66	62	Carbamylation; Deamidation (NQ); Oxidation (M); Acetylation (Protein N-term)	49173	BPI fold-containing family B member 2 OS=Homo sapiens OX=9606 GN=BPIFB2 PE=1 SV=2
133	394	Q01469|FABP5_HUMAN	Q01469	FABP5	HUMAN	211.55	73	73	73	73	73	75724	45900	77395	60339	13	13	48	48	61	71	Carbamidomethylation; Carbamylation; Deamidation (NQ); Oxidation (M); Acetylation (Protein N-term)	15164	Fatty acid-binding protein 5 OS=Homo sapiens OX=9606 GN=FABP5 PE=1 SV=3
319	102	P36871|PGM1_HUMAN	P36871	PGM1	HUMAN	211.09	38	30	30	18	20	18517	13948	5044	4996.8	19	19	25	27	11	13	Carbamidomethylation; Deamidation (NQ)	61449	Phosphoglucomutase-1 OS=Homo sapiens OX=9606 GN=PGM1 PE=1 SV=3
310	134	P43353|AL3B1_HUMAN	P43353	AL3B1	HUMAN	211.04	40	37	33	14	12	30131	34072	6040.9	3865.6	18	17	35	32	8	6	Carbamidomethylation; Carbamylation; Acetylation (Protein N-term)	51840	Aldehyde dehydrogenase family 3 member B1 OS=Homo sapiens OX=9606 GN=ALDH3B1 PE=1 SV=1
159	178	P17213|BPI_HUMAN	P17213	BPI	HUMAN	210.96	39	33	36	39	31	53420	44575	60584	64239	15	15	36	40	51	58	Carbamidomethylation; Carbamylation; Deamidation (NQ); Oxidation (M)	53900	Bactericidal permeability-increasing protein OS=Homo sapiens OX=9606 GN=BPI PE=1 SV=4
206	118	P50395|GDIB_HUMAN	P50395	GDIB	HUMAN	210.92	54	44	37	41	45	25058	13124	14374	10709	22	15	43	37	31	27	Carbamidomethylation; Carbamylation; Deamidation (NQ); Oxidation (M)	50663	Rab GDP dissociation inhibitor beta OS=Homo sapiens OX=9606 GN=GDI2 PE=1 SV=2
202	146	P13797|PLST_HUMAN	P13797	PLST	HUMAN	210.88	39	21	20	28	30	4411.5	4490.1	17086	14618	26	17	32	34	33	43	Carbamidomethylation; Carbamylation; Deamidation (NQ); Oxidation (M); Acetylation (Protein N-term)	70811	Plastin-3 OS=Homo sapiens OX=9606 GN=PLS3 PE=1 SV=4
172	491	P16402|H13_HUMAN	P16402	H13	HUMAN	210.87	33	30	31	30	33	823.26	1313.6	1523.7	1437.2	12	2	30	34	53	60	Carbamylation; Deamidation (NQ); Acetylation (Protein N-term)	22350	Histone H1.3 OS=Homo sapiens OX=9606 GN=H1-3 PE=1 SV=2
227	135	O14745|NHRF1_HUMAN	O14745	NHRF1	HUMAN	210.51	53	51	45	46	44	46182	39557	12207	13482	16	16	32	36	24	25	Carbamidomethylation; Deamidation (NQ); Oxidation (M); Acetylation (Protein N-term)	38868	Na(+)/H(+) exchange regulatory cofactor NHE-RF1 OS=Homo sapiens OX=9606 GN=SLC9A3R1 PE=1 SV=4
209	141	P36952|SPB5_HUMAN	P36952	SPB5	HUMAN	210.46	54	33	41	49	47	22873	22117	51350	41548	16	16	23	19	44	50	Carbamidomethylation; Carbamylation; Deamidation (NQ); Oxidation (M); Acetylation (Protein N-term)	42100	Serpin B5 OS=Homo sapiens OX=9606 GN=SERPINB5 PE=1 SV=2
57	351	A5A3E0|POTEF_HUMAN	A5A3E0	POTEF	HUMAN	210.4	10	7	9	8	9		0	385.22	593.66	10	1	162	170	108	106	Carbamidomethylation; Carbamylation; Deamidation (NQ); Acetylation (Protein N-term)	121444	POTE ankyrin domain family member F OS=Homo sapiens OX=9606 GN=POTEF PE=1 SV=2
275	156	P08670|VIME_HUMAN	P08670	VIME	HUMAN	209.82	53	46	42	16	20	24628	17993	3199.9	4985.6	27	22	38	31	12	11	Carbamidomethylation; Carbamylation; Deamidation (NQ); Oxidation (M); Acetylation (Protein N-term)	53652	Vimentin OS=Homo sapiens OX=9606 GN=VIM PE=1 SV=4
161	222	Q01546|K22O_HUMAN	Q01546	K22O	HUMAN	209.49	29	15	13	22	25	0	756.69	5499.6	9060.3	22	9	29	32	62	60	Carbamidomethylation; Carbamylation; Deamidation (NQ); Oxidation (M)	65841	Keratin type II cytoskeletal 2 oral OS=Homo sapiens OX=9606 GN=KRT76 PE=1 SV=2
278	133	P14923|PLAK_HUMAN	P14923	PLAK	HUMAN	209.09	33	18	19	28	25	16022	12574	21234	15387	21	19	18	20	27	27	Carbamidomethylation; Oxidation (M); Acetylation (Protein N-term)	81745	Junction plakoglobin OS=Homo sapiens OX=9606 GN=JUP PE=1 SV=3
308	152	P00751|CFAB_HUMAN	P00751	CFAB	HUMAN	208.73	27	24	22	17	17	31161	25864	11966	8281.1	20	20	28	25	16	12	Carbamidomethylation; Deamidation (NQ)	85533	Complement factor B OS=Homo sapiens OX=9606 GN=CFB PE=1 SV=2
304	121	Q86UX7|URP2_HUMAN	Q86UX7	URP2	HUMAN	207.62	44	23	27	29	25	19643	13509	13687	7960.1	23	23	21	23	21	17	Carbamidomethylation; Carbamylation; Deamidation (NQ)	75953	Fermitin family homolog 3 OS=Homo sapiens OX=9606 GN=FERMT3 PE=1 SV=1
301	160	Q9UM07|PADI4_HUMAN	Q9UM07	PADI4	HUMAN	207.6	29	24	21	18	23	17875	17475	16801	26415	18	16	16	22	20	25	Carbamidomethylation; Carbamylation; Deamidation (NQ); Oxidation (M)	74079	Protein-arginine deiminase type-4 OS=Homo sapiens OX=9606 GN=PADI4 PE=1 SV=2
139	233	Q06830|PRDX1_HUMAN	Q06830	PRDX1	HUMAN	207.59	66	64	61	63	63	49693	40068	43075	39973	17	13	40	53	67	59	Carbamidomethylation; Carbamylation; Deamidation (NQ); Oxidation (M); Acetylation (Protein N-term)	22110	Peroxiredoxin-1 OS=Homo sapiens OX=9606 GN=PRDX1 PE=1 SV=1
186	126	P68104|EF1A1_HUMAN	P68104	EF1A1	HUMAN	207.55	49	28	30	37	41	56132	32859	67851	57028	17	17	24	25	54	60	Carbamidomethylation; Carbamylation; Deamidation (NQ)	50141	Elongation factor 1-alpha 1 OS=Homo sapiens OX=9606 GN=EEF1A1 PE=1 SV=1
186	127	Q5VTE0|EF1A3_HUMAN	Q5VTE0	EF1A3	HUMAN	207.55	49	28	30	37	41	56132	32859	67851	57028	17	17	24	25	54	60	Carbamidomethylation; Carbamylation; Deamidation (NQ)	50185	Putative elongation factor 1-alpha-like 3 OS=Homo sapiens OX=9606 GN=EEF1A1P5 PE=5 SV=1
333	165	P14598|NCF1_HUMAN	P14598	NCF1	HUMAN	207.29	56	42	43	27	35	32302	10276	6641.8	14459	19	19	21	21	9	21	Carbamidomethylation; Deamidation (NQ)	44682	Neutrophil cytosol factor 1 OS=Homo sapiens OX=9606 GN=NCF1 PE=1 SV=4
291	140	P09769|FGR_HUMAN	P09769	FGR	HUMAN	207.13	32	24	24	26	25	19065	23400	18396	7361.6	16	14	18	21	29	19	Carbamidomethylation; Deamidation (NQ)	59479	Tyrosine-protein kinase Fgr OS=Homo sapiens OX=9606 GN=FGR PE=1 SV=2
298	128	Q15833|STXB2_HUMAN	Q15833	STXB2	HUMAN	206.98	42	34	30	24	19	19037	13373	7710.1	37511	21	20	27	28	16	13	Carbamidomethylation	66453	Syntaxin-binding protein 2 OS=Homo sapiens OX=9606 GN=STXBP2 PE=1 SV=2
358	154	P08582|TRFM_HUMAN	P08582	TRFM	HUMAN	206.88	27	19	21	15	15	10493	8910.6	4742.8	10902	18	18	16	20	14	13	Carbamidomethylation	80215	Melanotransferrin OS=Homo sapiens OX=9606 GN=MELTF PE=1 SV=2
302	220	Q14204|DYHC1_HUMAN	Q14204	DYHC1	HUMAN	206.4	9	6	5	2	2	20898	16209	3162.6	3991.8	41	41	31	26	11	14	Carbamidomethylation; Deamidation (NQ)	532412	Cytoplasmic dynein 1 heavy chain 1 OS=Homo sapiens OX=9606 GN=DYNC1H1 PE=1 SV=5
286	155	P08603|CFAH_HUMAN	P08603	CFAH	HUMAN	205.87	21	20	15	15	14	14909	13588	9638.7	6519.9	22	21	24	21	24	19	Carbamidomethylation; Deamidation (NQ); Oxidation (M)	139096	Complement factor H OS=Homo sapiens OX=9606 GN=CFH PE=1 SV=4
134	309	P09211|GSTP1_HUMAN	P09211	GSTP1	HUMAN	205.39	81	74	61	56	56	54360	55746	47895	42404	12	12	49	63	61	55	Carbamidomethylation; Carbamylation; Deamidation (NQ); Oxidation (M); Acetylation (Protein N-term)	23356	Glutathione S-transferase P OS=Homo sapiens OX=9606 GN=GSTP1 PE=1 SV=2
242	148	P55072|TERA_HUMAN	P55072	TERA	HUMAN	205.31	37	31	25	22	25	24942	18409	9497	13269	26	26	34	30	20	22	Carbamidomethylation; Carbamylation; Deamidation (NQ); Acetylation (Protein N-term)	89322	Transitional endoplasmic reticulum ATPase OS=Homo sapiens OX=9606 GN=VCP PE=1 SV=4
191	153	P63092|GNAS2_HUMAN	P63092	GNAS2	HUMAN	204.44	54	45	30	31	42	27191	19556	33293	59041	17	16	37	29	41	49	Carbamidomethylation; Carbamylation; Deamidation (NQ); Acetylation (Protein N-term)	45665	Guanine nucleotide-binding protein G(s) subunit alpha isoforms short OS=Homo sapiens OX=9606 GN=GNAS PE=1 SV=1
191	164	Q5JWF2|GNAS1_HUMAN	Q5JWF2	GNAS1	HUMAN	204.44	21	17	12	12	16	27191	19556	33293	59041	17	16	37	29	41	49	Carbamidomethylation; Carbamylation; Deamidation (NQ); Acetylation (Protein N-term)	111024	Guanine nucleotide-binding protein G(s) subunit alpha isoforms XLas OS=Homo sapiens OX=9606 GN=GNAS PE=1 SV=2
230	145	O75131|CPNE3_HUMAN	O75131	CPNE3	HUMAN	204.42	45	39	37	28	32	42727	14835	26852	20996	22	21	32	31	26	26	Carbamidomethylation; Carbamylation; Deamidation (NQ)	60131	Copine-3 OS=Homo sapiens OX=9606 GN=CPNE3 PE=1 SV=1
241	180	P47756|CAPZB_HUMAN	P47756	CAPZB	HUMAN	203.93	64	52	43	52	56	23103	24698	17085	19011	17	17	30	24	26	27	Carbamidomethylation; Deamidation (NQ); Oxidation (M); Acetylation (Protein N-term)	31350	F-actin-capping protein subunit beta OS=Homo sapiens OX=9606 GN=CAPZB PE=1 SV=4
240	147	P07237|PDIA1_HUMAN	P07237	PDIA1	HUMAN	203.93	48	37	36	25	21	40777	28762	16203	8977.3	25	25	40	27	22	18	Carbamidomethylation; Carbamylation; Deamidation (NQ); Oxidation (M)	57116	Protein disulfide-isomerase OS=Homo sapiens OX=9606 GN=P4HB PE=1 SV=3
59	211	P19012|K1C15_HUMAN	P19012	K1C15	HUMAN	203.91	28	26	23	25	23	0	587.33	2681.7	1563.4	16	3	68	86	184	204	Carbamidomethylation; Carbamylation; Deamidation (NQ); Oxidation (M); Acetylation (Protein N-term)	49212	Keratin type I cytoskeletal 15 OS=Homo sapiens OX=9606 GN=KRT15 PE=1 SV=3
213	161	P31946|1433B_HUMAN	P31946	1433B	HUMAN	203.79	67	55	60	49	45	21241	17751	12640	12727	17	8	40	33	28	30	Carbamylation; Deamidation (NQ); Oxidation (M); Acetylation (Protein N-term)	28082	14-3-3 protein beta/alpha OS=Homo sapiens OX=9606 GN=YWHAB PE=1 SV=3
238	175	Q08554|DSC1_HUMAN	Q08554	DSC1	HUMAN	203.45	20	11	12	17	18	6598	9652.5	23770	20501	15	15	17	20	37	34	Carbamidomethylation; Carbamylation; Deamidation (NQ); Oxidation (M)	99987	Desmocollin-1 OS=Homo sapiens OX=9606 GN=DSC1 PE=1 SV=2
288	255	Q99536|VAT1_HUMAN	Q99536	VAT1	HUMAN	203.11	36	32	26	23	24	28129	11389	26264	14376	11	11	22	21	19	26	Carbamidomethylation; Carbamylation; Deamidation (NQ); Oxidation (M)	41920	Synaptic vesicle membrane protein VAT-1 homolog OS=Homo sapiens OX=9606 GN=VAT1 PE=1 SV=2
325	136	P30838|AL3A1_HUMAN	P30838	AL3A1	HUMAN	202.32	44	37	32	32	31	28287	13276	11883	9615.9	19	18	25	20	15	15	Carbamidomethylation	50395	Aldehyde dehydrogenase dimeric NADP-preferring OS=Homo sapiens OX=9606 GN=ALDH3A1 PE=1 SV=3
254	144	P09525|ANXA4_HUMAN	P09525	ANXA4	HUMAN	201.16	57	38	40	52	53	26268	19914	27234	33946	20	20	19	19	29	32	Carbamidomethylation; Deamidation (NQ)	35883	Annexin A4 OS=Homo sapiens OX=9606 GN=ANXA4 PE=1 SV=4
280	176	O15143|ARC1B_HUMAN	O15143	ARC1B	HUMAN	200.35	52	42	41	27	34	31925	23637	11819	12664	17	16	28	30	14	19	Carbamidomethylation; Carbamylation; Deamidation (NQ); Acetylation (Protein N-term)	40950	Actin-related protein 2/3 complex subunit 1B OS=Homo sapiens OX=9606 GN=ARPC1B PE=1 SV=3
257	210	P25311|ZA2G_HUMAN	P25311	ZA2G	HUMAN	199.95	52	42	48	33	43	36877	28339	12078	10251	15	15	37	31	16	14	Carbamidomethylation; Carbamylation; Deamidation (NQ)	34259	Zinc-alpha-2-glycoprotein OS=Homo sapiens OX=9606 GN=AZGP1 PE=1 SV=2
285	150	P11021|BIP_HUMAN	P11021	BIP	HUMAN	199.92	40	35	19	20	20	18890	12547	5449.6	4804.5	21	20	31	18	19	21	Carbamylation; Deamidation (NQ)	72333	Endoplasmic reticulum chaperone BiP OS=Homo sapiens OX=9606 GN=HSPA5 PE=1 SV=2
349	166	P05023|AT1A1_HUMAN	P05023	AT1A1	HUMAN	199	23	17	12	13	13	6244.3	1202.3	5437.6	3337.3	21	11	25	15	12	13	Carbamidomethylation	112896	Sodium/potassium-transporting ATPase subunit alpha-1 OS=Homo sapiens OX=9606 GN=ATP1A1 PE=1 SV=1
335	139	Q12913|PTPRJ_HUMAN	Q12913	PTPRJ	HUMAN	197.95	18	18	10	7	6	27343	18467	9747.4	5857.3	18	18	27	18	13	13	Carbamidomethylation; Deamidation (NQ)	145941	Receptor-type tyrosine-protein phosphatase eta OS=Homo sapiens OX=9606 GN=PTPRJ PE=1 SV=3
267	187	P02647|APOA1_HUMAN	P02647	APOA1	HUMAN	197.66	56	52	42	40	42	20696	17716	15695	10102	17	17	28	27	25	15	Carbamylation; Deamidation (NQ)	30778	Apolipoprotein A-I OS=Homo sapiens OX=9606 GN=APOA1 PE=1 SV=1
382	254	P12111|CO6A3_HUMAN	P12111	CO6A3	HUMAN	196.92	12	9	7	1	1	21022	13981	262.46	1813.2	36	36	31	22	1	2	Carbamylation; Deamidation (NQ); Oxidation (M)	343668	Collagen alpha-3(VI) chain OS=Homo sapiens OX=9606 GN=COL6A3 PE=1 SV=5
279	194	P30041|PRDX6_HUMAN	P30041	PRDX6	HUMAN	196.87	67	51	47	63	67	25761	20723	19243	17501	16	16	26	17	25	23	Carbamidomethylation; Carbamylation; Deamidation (NQ); Acetylation (Protein N-term)	25035	Peroxiredoxin-6 OS=Homo sapiens OX=9606 GN=PRDX6 PE=1 SV=3
342	267	O00160|MYO1F_HUMAN	O00160	MYO1F	HUMAN	196.67	22	12	13	13	11	24315	11416	9434	11922	24	24	16	14	22	16	Carbamidomethylation; Carbamylation	124844	Unconventional myosin-If OS=Homo sapiens OX=9606 GN=MYO1F PE=1 SV=3
147	375	P69892|HBG2_HUMAN	P69892	HBG2	HUMAN	196.42	69	69	69	22	31	30100	28729			10	1	91	89	15	9	Carbamidomethylation; Carbamylation; Deamidation (NQ); Oxidation (M); Acetylation (Protein N-term)	16126	Hemoglobin subunit gamma-2 OS=Homo sapiens OX=9606 GN=HBG2 PE=1 SV=2
300	137	O75083|WDR1_HUMAN	O75083	WDR1	HUMAN	196.37	32	30	21	19	21	29557	20142	8047.8	10068	17	17	28	25	16	14	Carbamidomethylation; Deamidation (NQ)	66194	WD repeat-containing protein 1 OS=Homo sapiens OX=9606 GN=WDR1 PE=1 SV=4
130	243	O00560|SDCB1_HUMAN	O00560	SDCB1	HUMAN	196.35	62	57	57	62	54	70200	61759	30747	23310	13	13	62	78	39	55	Carbamidomethylation; Carbamylation; Deamidation (NQ); Oxidation (M); Acetylation (Protein N-term)	32444	Syntenin-1 OS=Homo sapiens OX=9606 GN=SDCBP PE=1 SV=1
348	202	P19878|NCF2_HUMAN	P19878	NCF2	HUMAN	195.78	35	25	22	26	21	14967	7506.2	16028	5933.1	17	17	20	14	17	15	Carbamidomethylation; Carbamylation; Deamidation (NQ)	59762	Neutrophil cytosol factor 2 OS=Homo sapiens OX=9606 GN=NCF2 PE=1 SV=2
151	377	P69891|HBG1_HUMAN	P69891	HBG1	HUMAN	194.7	69	69	69	22	31	52069	7866.7			10	1	87	89	15	9	Carbamidomethylation; Carbamylation; Deamidation (NQ); Oxidation (M); Acetylation (Protein N-term)	16140	Hemoglobin subunit gamma-1 OS=Homo sapiens OX=9606 GN=HBG1 PE=1 SV=2
219	304	P23528|COF1_HUMAN	P23528	COF1	HUMAN	194.5	79	76	78	77	65	52701	49196	42281	38649	13	12	32	37	27	28	Carbamidomethylation; Deamidation (NQ); Oxidation (M); Acetylation (Protein N-term)	18502	Cofilin-1 OS=Homo sapiens OX=9606 GN=CFL1 PE=1 SV=3
229	329	P18669|PGAM1_HUMAN	P18669	PGAM1	HUMAN	194.31	56	46	41	46	46	64416	78940	25453	9673.9	12	8	33	34	26	23	Carbamidomethylation; Carbamylation; Deamidation (NQ); Acetylation (Protein N-term)	28804	Phosphoglycerate mutase 1 OS=Homo sapiens OX=9606 GN=PGAM1 PE=1 SV=2
413	185	Q13813|SPTN1_HUMAN	Q13813	SPTN1	HUMAN	194.22	12	9	4	3	3	10160	8478	2521.5	3748	26	26	24	13	6	7	Carbamidomethylation; Deamidation (NQ)	284538	Spectrin alpha chain non-erythrocytic 1 OS=Homo sapiens OX=9606 GN=SPTAN1 PE=1 SV=3
188	323	P31025|LCN1_HUMAN	P31025	LCN1	HUMAN	193.84	63	53	53	63	63	37394	27414	81998	89794	10	10	18	21	64	58	Carbamidomethylation; Carbamylation; Deamidation (NQ); Oxidation (M)	19250	Lipocalin-1 OS=Homo sapiens OX=9606 GN=LCN1 PE=1 SV=1
117	387	O60814|H2B1K_HUMAN	O60814	H2B1K	HUMAN	193.68	67	53	52	47	47	35906	21957	10964	14091	10	2	66	71	63	63	Carbamylation; Deamidation (NQ); Oxidation (M); Acetylation (Protein N-term)	13890	Histone H2B type 1-K OS=Homo sapiens OX=9606 GN=H2BC12 PE=1 SV=3
117	388	P62807|H2B1C_HUMAN	P62807	H2B1C	HUMAN	193.68	67	53	52	47	47	35906	21957	10964	14091	10	2	66	71	63	63	Carbamylation; Deamidation (NQ); Oxidation (M); Acetylation (Protein N-term)	13906	Histone H2B type 1-C/E/F/G/I OS=Homo sapiens OX=9606 GN=H2BC4 PE=1 SV=4
108	330	P62937|PPIA_HUMAN	P62937	PPIA	HUMAN	193.61	71	71	71	71	71	65821	42863	41502	39802	12	12	64	68	80	79	Carbamidomethylation; Carbamylation; Deamidation (NQ); Oxidation (M); Acetylation (Protein N-term)	18012	Peptidyl-prolyl cis-trans isomerase A OS=Homo sapiens OX=9606 GN=PPIA PE=1 SV=2
70	588	P01037|CYTN_HUMAN	P01037	CYTN	HUMAN	193.44	66	54	54	66	66	15168	19159	54702	48924	10	7	95	131	113	132	Carbamidomethylation; Carbamylation; Deamidation (NQ); Acetylation (Protein N-term)	16388	Cystatin-SN OS=Homo sapiens OX=9606 GN=CST1 PE=1 SV=3
359	167	P13489|RINI_HUMAN	P13489	RINI	HUMAN	193.43	46	33	33	41	35	7962.4	11377	9435.7	8443.4	15	15	15	15	20	13	Carbamidomethylation; Deamidation (NQ); Acetylation (Protein N-term)	49974	Ribonuclease inhibitor OS=Homo sapiens OX=9606 GN=RNH1 PE=1 SV=2
287	226	P61160|ARP2_HUMAN	P61160	ARP2	HUMAN	193.4	37	23	31	21	25	35838	29894	15535	15632	14	14	25	31	15	17	Carbamidomethylation; Carbamylation; Deamidation (NQ); Oxidation (M)	44761	Actin-related protein 2 OS=Homo sapiens OX=9606 GN=ACTR2 PE=1 SV=1
314	196	P43490|NAMPT_HUMAN	P43490	NAMPT	HUMAN	192.48	39	35	29	21	27	17068	22587	5251	7251.7	18	18	29	18	15	17	Carbamidomethylation; Deamidation (NQ); Acetylation (Protein N-term)	55521	Nicotinamide phosphoribosyltransferase OS=Homo sapiens OX=9606 GN=NAMPT PE=1 SV=1
387	190	Q9H2G2|SLK_HUMAN	Q9H2G2	SLK	HUMAN	192.29	19	14	10	8	8	14990	8913.7	4057.2	5392.9	21	19	18	13	14	9	Carbamidomethylation; Carbamylation; Deamidation (NQ)	142695	STE20-like serine/threonine-protein kinase OS=Homo sapiens OX=9606 GN=SLK PE=1 SV=1
260	173	P07948|LYN_HUMAN	P07948	LYN	HUMAN	191.94	41	38	33	24	29	45510	33262	3820.2	15837	20	16	27	27	21	21	Carbamidomethylation; Deamidation (NQ)	58574	Tyrosine-protein kinase Lyn OS=Homo sapiens OX=9606 GN=LYN PE=1 SV=3
316	199	Q8N1N4|K2C78_HUMAN	Q8N1N4	K2C78	HUMAN	191.93	31	24	13	27	19	6589	2439.2	9128.1	7842.4	18	15	16	11	26	25	Carbamidomethylation; Carbamylation; Deamidation (NQ)	56866	Keratin type II cytoskeletal 78 OS=Homo sapiens OX=9606 GN=KRT78 PE=1 SV=2
235	218	P11413|G6PD_HUMAN	P11413	G6PD	HUMAN	191.78	45	36	35	28	32	36333	28467	22014	18403	25	25	32	30	21	28	Carbamylation; Deamidation (NQ)	59257	Glucose-6-phosphate 1-dehydrogenase OS=Homo sapiens OX=9606 GN=G6PD PE=1 SV=4
380	188	P16152|CBR1_HUMAN	P16152	CBR1	HUMAN	191.44	57	32	21	37	48	3752.7	1096.7	10469	10150	13	10	12	8	17	20	Carbamidomethylation; Deamidation (NQ); Acetylation (Protein N-term)	30375	Carbonyl reductase [NADPH] 1 OS=Homo sapiens OX=9606 GN=CBR1 PE=1 SV=3
323	179	Q9UIV8|SPB13_HUMAN	Q9UIV8	SPB13	HUMAN	191.23	45	45	33	30	32	20575	12294	11355	11342	17	17	26	18	16	15	Carbamylation; Deamidation (NQ); Acetylation (Protein N-term)	44276	Serpin B13 OS=Homo sapiens OX=9606 GN=SERPINB13 PE=1 SV=2
320	400	Q9HCY8|S10AE_HUMAN	Q9HCY8	S10AE	HUMAN	190.49	93	93	67	85	85	34170	16765	14725	20573	10	10	22	14	22	18	Carbamidomethylation; Carbamylation; Deamidation (NQ)	11662	Protein S100-A14 OS=Homo sapiens OX=9606 GN=S100A14 PE=1 SV=1
98	548	P08246|ELNE_HUMAN	P08246	ELNE	HUMAN	190.33	37	37	37	37	37	161310	159780	316430	276460	8	8	47	44	128	103	Carbamidomethylation; Carbamylation; Deamidation (NQ); Oxidation (M); Acetylation (Protein N-term)	28518	Neutrophil elastase OS=Homo sapiens OX=9606 GN=ELANE PE=1 SV=1
244	177	P62258|1433E_HUMAN	P62258	1433E	HUMAN	190.22	65	62	43	45	38	25251	15094	11201	6251.7	16	13	33	28	20	23	Carbamidomethylation; Deamidation (NQ); Oxidation (M); Acetylation (Protein N-term)	29174	14-3-3 protein epsilon OS=Homo sapiens OX=9606 GN=YWHAE PE=1 SV=1
225	300	Q9HAV0|GBB4_HUMAN	Q9HAV0	GBB4	HUMAN	190.04	35	23	19	33	33	5298.6	3824.7	3746.6	3996.4	10	4	31	27	29	31	Carbamidomethylation; Carbamylation; Acetylation (Protein N-term)	37567	Guanine nucleotide-binding protein subunit beta-4 OS=Homo sapiens OX=9606 GN=GNB4 PE=1 SV=3
369	278	O00161|SNP23_HUMAN	O00161	SNP23	HUMAN	189.56	64	52	54	49	50	18987	13461	5038.7	7500.9	11	11	17	16	10	18	Carbamidomethylation; Carbamylation; Deamidation (NQ); Oxidation (M); Acetylation (Protein N-term)	23354	Synaptosomal-associated protein 23 OS=Homo sapiens OX=9606 GN=SNAP23 PE=1 SV=1
158	242	P35241|RADI_HUMAN	P35241	RADI	HUMAN	189.36	30	23	17	20	18	1008	1165.3	1334.8	1808.7	22	6	55	54	36	39	Carbamylation; Deamidation (NQ); Oxidation (M)	68564	Radixin OS=Homo sapiens OX=9606 GN=RDX PE=1 SV=1
84	573	Q9BYX7|ACTBM_HUMAN	Q9BYX7	ACTBM	HUMAN	189.2	25	25	20	20	20	7013.5	7017.6	1557.9	1216.7	7	2	128	123	74	70	Carbamidomethylation; Carbamylation; Deamidation (NQ); Oxidation (M); Acetylation (Protein N-term)	42016	Putative beta-actin-like protein 3 OS=Homo sapiens OX=9606 GN=POTEKP PE=5 SV=1
24	893	P0CF74|IGLC6_HUMAN	P0CF74	IGLC6	HUMAN	188.99	70	70	51	51	51	0				5	1	311	327	254	290	Carbamidomethylation; Carbamylation; Deamidation (NQ); Acetylation (Protein N-term)	11277	Immunoglobulin lambda constant 6 OS=Homo sapiens OX=9606 GN=IGLC6 PE=1 SV=1
187	249	P08754|GNAI3_HUMAN	P08754	GNAI3	HUMAN	188.55	40	29	29	33	32	15224	9840.7	7651.3	6175.5	14	8	48	38	40	36	Carbamidomethylation; Carbamylation; Deamidation (NQ); Oxidation (M)	40532	Guanine nucleotide-binding protein G(i) subunit alpha OS=Homo sapiens OX=9606 GN=GNAI3 PE=1 SV=3
210	526	Q7RTS7|K2C74_HUMAN	Q7RTS7	K2C74	HUMAN	188.43	12	8	6	8	10				12536	9	1	22	23	45	45	Carbamidomethylation; Carbamylation; Deamidation (NQ)	57865	Keratin type II cytoskeletal 74 OS=Homo sapiens OX=9606 GN=KRT74 PE=1 SV=2
344	183	P50552|VASP_HUMAN	P50552	VASP	HUMAN	188.2	42	36	38	33	23	11337	13193	8601.4	4978.9	15	15	20	20	15	12	Carbamidomethylation; Deamidation (NQ); Acetylation (Protein N-term)	39830	Vasodilator-stimulated phosphoprotein OS=Homo sapiens OX=9606 GN=VASP PE=1 SV=3
356	313	P29373|RABP2_HUMAN	P29373	RABP2	HUMAN	188.06	81	54	45	62	74	16760	7153.7	20162	13944	11	11	16	12	17	19	Carbamidomethylation; Deamidation (NQ)	15693	Cellular retinoic acid-binding protein 2 OS=Homo sapiens OX=9606 GN=CRABP2 PE=1 SV=2
204	321	P28676|GRAN_HUMAN	P28676	GRAN	HUMAN	187.29	51	51	48	51	51	45396	27693	17971	23772	11	11	34	37	33	35	Carbamidomethylation; Deamidation (NQ); Oxidation (M)	24010	Grancalcin OS=Homo sapiens OX=9606 GN=GCA PE=1 SV=2
71	495	P04080|CYTB_HUMAN	P04080	CYTB	HUMAN	186.87	95	80	95	89	95	107650	62403	77814	77962	8	8	67	115	152	134	Carbamidomethylation; Carbamylation; Deamidation (NQ); Oxidation (M); Acetylation (Protein N-term)	11140	Cystatin-B OS=Homo sapiens OX=9606 GN=CSTB PE=1 SV=2
339	266	P10909|CLUS_HUMAN	P10909	CLUS	HUMAN	186.83	29	29	27	16	20	27721	21882	6176.4	6608.1	14	14	28	24	10	7	Carbamidomethylation; Carbamylation; Deamidation (NQ)	52495	Clusterin OS=Homo sapiens OX=9606 GN=CLU PE=1 SV=1
259	227	P27348|1433T_HUMAN	P27348	1433T	HUMAN	186.4	53	40	47	36	33	8995.7	7221.7	6946.9	4127.8	14	7	26	27	21	23	Carbamidomethylation; Carbamylation; Deamidation (NQ); Oxidation (M); Acetylation (Protein N-term)	27764	14-3-3 protein theta OS=Homo sapiens OX=9606 GN=YWHAQ PE=1 SV=1
329	169	P37837|TALDO_HUMAN	P37837	TALDO	HUMAN	186.36	48	37	40	22	24	30486	27463	10208	5714.4	19	19	25	25	12	11	Carbamidomethylation; Carbamylation; Deamidation (NQ); Oxidation (M); Acetylation (Protein N-term)	37540	Transaldolase OS=Homo sapiens OX=9606 GN=TALDO1 PE=1 SV=2
372	182	P09543|CN37_HUMAN	P09543	CN37	HUMAN	185.62	40	27	24	29	11	22683	17177	6973.7	4460.8	16	16	19	16	16	9	Carbamidomethylation; Deamidation (NQ)	47579	2' 3'-cyclic-nucleotide 3'-phosphodiesterase OS=Homo sapiens OX=9606 GN=CNP PE=1 SV=2
264	259	Q86T26|TM11B_HUMAN	Q86T26	TM11B	HUMAN	185.29	31	27	24	15	19	45586	38015	25700	25759	12	12	33	24	19	20	Carbamidomethylation; Carbamylation; Deamidation (NQ); Oxidation (M); Acetylation (Protein N-term)	46337	Transmembrane protease serine 11B OS=Homo sapiens OX=9606 GN=TMPRSS11B PE=2 SV=3
390	349	P01011|AACT_HUMAN	P01011	AACT	HUMAN	184.56	23	21	17	17	16	8807.8	3565.4	3871	2238.3	10	10	18	15	11	10	Oxidation (M)	47651	Alpha-1-antichymotrypsin OS=Homo sapiens OX=9606 GN=SERPINA3 PE=1 SV=2
180	589	Q9HD89|RETN_HUMAN	Q9HD89	RETN	HUMAN	184.52	77	77	77	59	52	123480	106200	30518	25009	6	6	50	64	26	28	Carbamidomethylation; Carbamylation; Deamidation (NQ); Oxidation (M); Acetylation (Protein N-term)	11419	Resistin OS=Homo sapiens OX=9606 GN=RETN PE=1 SV=1
251	395	P61224|RAP1B_HUMAN	P61224	RAP1B	HUMAN	184.41	59	45	34	45	59	8422.7	1234.3	1667.2	5949.9	12	3	21	20	28	32	Carbamidomethylation; Carbamylation; Deamidation (NQ); Acetylation (Protein N-term)	20825	Ras-related protein Rap-1b OS=Homo sapiens OX=9606 GN=RAP1B PE=1 SV=1
246	336	Q8N6Q3|CD177_HUMAN	Q8N6Q3	CD177	HUMAN	184.32	29	24	15	26	28	36212	25124	29642	19767	11	11	25	17	26	35	Carbamidomethylation; Carbamylation; Deamidation (NQ); Acetylation (Protein N-term)	46363	CD177 antigen OS=Homo sapiens OX=9606 GN=CD177 PE=1 SV=2
167	382	P15153|RAC2_HUMAN	P15153	RAC2	HUMAN	183.96	45	45	45	45	45	35798	29672	27919	21802	10	5	47	41	46	48	Carbamidomethylation; Carbamylation; Deamidation (NQ)	21429	Ras-related C3 botulinum toxin substrate 2 OS=Homo sapiens OX=9606 GN=RAC2 PE=1 SV=1
384	207	Q96F07|CYFP2_HUMAN	Q96F07	CYFP2	HUMAN	183.75	16	13	7	6	6	3312.8	3611.8	7728	3709.7	20	9	21	11	13	10	Carbamidomethylation; Deamidation (NQ); Acetylation (Protein N-term)	148398	Cytoplasmic FMR1-interacting protein 2 OS=Homo sapiens OX=9606 GN=CYFIP2 PE=1 SV=2
431	212	P02545|LMNA_HUMAN	P02545	LMNA	HUMAN	183.33	30	21	25	7	7	13302	11226	2634.8	1499.3	20	18	16	21	5	5	Carbamidomethylation; Carbamylation; Deamidation (NQ)	74140	Prelamin-A/C OS=Homo sapiens OX=9606 GN=LMNA PE=1 SV=1
198	392	P60660|MYL6_HUMAN	P60660	MYL6	HUMAN	182.53	66	58	66	56	66	68666	73097	34651	44422	10	10	44	39	27	36	Carbamidomethylation; Carbamylation; Deamidation (NQ); Oxidation (M); Acetylation (Protein N-term)	16930	Myosin light polypeptide 6 OS=Homo sapiens OX=9606 GN=MYL6 PE=1 SV=2
591	198	P98160|PGBM_HUMAN	P98160	PGBM	HUMAN	182.52	5	3	3	0	0	9074.1	7765.7			16	16	13	12	0	0	Carbamidomethylation; Deamidation (NQ)	468835	Basement membrane-specific heparan sulfate proteoglycan core protein OS=Homo sapiens OX=9606 GN=HSPG2 PE=1 SV=4
293	223	P51149|RAB7A_HUMAN	P51149	RAB7A	HUMAN	181.78	61	61	45	53	56	21524	17079	14834	11601	12	12	24	21	21	20	Carbamidomethylation; Deamidation (NQ)	23490	Ras-related protein Rab-7a OS=Homo sapiens OX=9606 GN=RAB7A PE=1 SV=1
243	192	Q02487|DSC2_HUMAN	Q02487	DSC2	HUMAN	181.73	20	16	10	13	12	21554	6757.2	23734	20835	13	13	25	14	31	35	Carbamidomethylation; Carbamylation; Deamidation (NQ)	99962	Desmocollin-2 OS=Homo sapiens OX=9606 GN=DSC2 PE=1 SV=1
315	401	P54108|CRIS3_HUMAN	P54108	CRIS3	HUMAN	181.44	42	38	38	33	33	19042	15530	22165	24576	8	8	22	18	17	22	Carbamidomethylation; Deamidation (NQ)	27630	Cysteine-rich secretory protein 3 OS=Homo sapiens OX=9606 GN=CRISP3 PE=1 SV=1
452	197	Q9H223|EHD4_HUMAN	Q9H223	EHD4	HUMAN	180.89	31	24	24	12	12	15126	12478	2729.3	2791.4	15	12	15	16	6	7	Carbamidomethylation; Deamidation (NQ)	61175	EH domain-containing protein 4 OS=Homo sapiens OX=9606 GN=EHD4 PE=1 SV=1
190	674	P21926|CD9_HUMAN	P21926	CD9	HUMAN	180.82	31	31	25	25	25	141580	110200	82100	69750	8	8	38	47	33	41	Carbamidomethylation; Carbamylation; Deamidation (NQ)	25416	CD9 antigen OS=Homo sapiens OX=9606 GN=CD9 PE=1 SV=4
484	297	Q9UL52|TM11E_HUMAN	Q9UL52	TM11E	HUMAN	180.24	33	33	24	13	14	17397	12081	1944.3	3372.3	13	13	16	13	5	5	Carbamidomethylation; Deamidation (NQ); Acetylation (Protein N-term)	47696	Transmembrane protease serine 11E OS=Homo sapiens OX=9606 GN=TMPRSS11E PE=1 SV=2
197	684	P49913|CAMP_HUMAN	P49913	CAMP	HUMAN	179.87	34	34	34	34	34	187020	163760	155590	95595	9	9	33	40	40	32	Carbamidomethylation; Carbamylation; Deamidation (NQ); Oxidation (M); Acetylation (Protein N-term)	19301	Cathelicidin antimicrobial peptide OS=Homo sapiens OX=9606 GN=CAMP PE=1 SV=1
107	472	P20160|CAP7_HUMAN	P20160	CAP7	HUMAN	179.76	47	41	47	47	47	89941	67880	69906	61476	8	8	68	70	77	77	Carbamidomethylation; Carbamylation; Deamidation (NQ); Oxidation (M)	26886	Azurocidin OS=Homo sapiens OX=9606 GN=AZU1 PE=1 SV=3
95	843	P13987|CD59_HUMAN	P13987	CD59	HUMAN	179.35	28	28	28	26	26	239960	184680	115820	122170	7	7	83	85	88	74	Carbamidomethylation; Carbamylation; Deamidation (NQ); Acetylation (Protein N-term)	14177	CD59 glycoprotein OS=Homo sapiens OX=9606 GN=CD59 PE=1 SV=1
414	193	Q14254|FLOT2_HUMAN	Q14254	FLOT2	HUMAN	178.51	37	27	21	23	23	10313	7793.2	10133	6474.1	16	16	13	12	12	12	Carbamidomethylation; Deamidation (NQ)	47064	Flotillin-2 OS=Homo sapiens OX=9606 GN=FLOT2 PE=1 SV=2
462	246	Q96G03|PGM2_HUMAN	Q96G03	PGM2	HUMAN	178.43	36	27	16	12	15	13978	7495.6	2812.1	2466.3	17	17	18	11	6	7	Carbamidomethylation; Deamidation (NQ); Acetylation (Protein N-term)	68283	Phosphoglucomutase-2 OS=Homo sapiens OX=9606 GN=PGM2 PE=1 SV=4
451	208	O43451|MGA_HUMAN	O43451	MGA	HUMAN	178.41	9	6	6	2	3	13111	21905	2654.8	2305.3	14	13	16	15	6	7	Carbamidomethylation; Carbamylation	209851	Maltase-glucoamylase intestinal OS=Homo sapiens OX=9606 GN=MGAM PE=1 SV=5
295	205	P68366|TBA4A_HUMAN	P68366	TBA4A	HUMAN	178.09	48	40	35	38	16	6094.6	2994.2	4918.9	2945.4	17	4	28	28	17	12	Carbamidomethylation	49924	Tubulin alpha-4A chain OS=Homo sapiens OX=9606 GN=TUBA4A PE=1 SV=1
594	367	Q9P0G3|KLK14_HUMAN	Q9P0G3	KLK14	HUMAN	178.07	46	13	0	37	32	862.37		4750.4	4431.5	8	8	2	0	12	11	Carbamidomethylation; Deamidation (NQ)	29122	Kallikrein-14 OS=Homo sapiens OX=9606 GN=KLK14 PE=1 SV=2
355	224	Q14CN2|CLCA4_HUMAN	Q14CN2	CLCA4	HUMAN	177.64	21	17	13	14	11	15937	12230	15352	7776.2	16	16	17	14	19	14	Carbamidomethylation; Deamidation (NQ)	101282	Calcium-activated chloride channel regulator 4 OS=Homo sapiens OX=9606 GN=CLCA4 PE=1 SV=2
367	221	P50148|GNAQ_HUMAN	P50148	GNAQ	HUMAN	177.62	38	35	24	27	26	11766	851.05	3660.2	6389.1	13	9	18	14	15	14	Carbamidomethylation; Carbamylation; Acetylation (Protein N-term)	42142	Guanine nucleotide-binding protein G(q) subunit alpha OS=Homo sapiens OX=9606 GN=GNAQ PE=1 SV=4
473	238	O60437|PEPL_HUMAN	O60437	PEPL	HUMAN	177.55	12	6	3	7	5	6548.6	2297.8	7620.6	2208.4	19	19	13	7	11	9	Carbamidomethylation; Deamidation (NQ)	204745	Periplakin OS=Homo sapiens OX=9606 GN=PPL PE=1 SV=4
305	407	P61204|ARF3_HUMAN	P61204	ARF3	HUMAN	177.54	66	44	41	53	52	24767	18045	16910	21436	12	8	20	22	24	16	Deamidation (NQ); Oxidation (M)	20601	ADP-ribosylation factor 3 OS=Homo sapiens OX=9606 GN=ARF3 PE=1 SV=2
305	408	P84077|ARF1_HUMAN	P84077	ARF1	HUMAN	177.54	66	44	41	53	52	24767	18045	16910	21436	12	8	20	22	24	16	Deamidation (NQ); Oxidation (M)	20697	ADP-ribosylation factor 1 OS=Homo sapiens OX=9606 GN=ARF1 PE=1 SV=2
504	219	O94804|STK10_HUMAN	O94804	STK10	HUMAN	177.35	14	9	8	7	6	7451.3	4888.7	4041.9	3702.8	13	11	9	10	9	7	Carbamidomethylation	112135	Serine/threonine-protein kinase 10 OS=Homo sapiens OX=9606 GN=STK10 PE=1 SV=1
505	189	Q8TE68|ES8L1_HUMAN	Q8TE68	ES8L1	HUMAN	176.82	21	15	16	6	8	5393.1	7027.6	1219.3	1411.6	13	13	13	14	3	5	Carbamidomethylation; Acetylation (Protein N-term)	80251	Epidermal growth factor receptor kinase substrate 8-like protein 1 OS=Homo sapiens OX=9606 GN=EPS8L1 PE=1 SV=3
277	258	P08729|K2C7_HUMAN	P08729	K2C7	HUMAN	176.35	36	25	21	12	10	7482.9	4661.2	0		19	10	19	21	29	23	Carbamylation; Oxidation (M)	51386	Keratin type II cytoskeletal 7 OS=Homo sapiens OX=9606 GN=KRT7 PE=1 SV=5
456	256	P35228|NOS2_HUMAN	P35228	NOS2	HUMAN	176.08	19	14	15	0	0	8624.7	16624			22	22	19	24	0	0	Carbamidomethylation	131117	Nitric oxide synthase inducible OS=Homo sapiens OX=9606 GN=NOS2 PE=1 SV=2
74	483	P01036|CYTS_HUMAN	P01036	CYTS	HUMAN	175.91	60	60	60	60	50	12512	10561	10331	8972.5	8	3	89	118	100	114	Carbamidomethylation; Carbamylation; Deamidation (NQ); Oxidation (M); Acetylation (Protein N-term)	16214	Cystatin-S OS=Homo sapiens OX=9606 GN=CST4 PE=1 SV=3
194	397	P63000|RAC1_HUMAN	P63000	RAC1	HUMAN	175.72	45	45	38	38	38	9414.8	3157.7	3638.8	7990.4	10	5	42	30	36	42	Carbamidomethylation; Carbamylation; Deamidation (NQ); Oxidation (M)	21450	Ras-related C3 botulinum toxin substrate 1 OS=Homo sapiens OX=9606 GN=RAC1 PE=1 SV=1
498	260	P19823|ITIH2_HUMAN	P19823	ITIH2	HUMAN	175.16	15	14	10	5	2	8590.1	7793.4	3422.9	1330.6	11	11	16	13	5	2	Deamidation (NQ); Oxidation (M)	106463	Inter-alpha-trypsin inhibitor heavy chain H2 OS=Homo sapiens OX=9606 GN=ITIH2 PE=1 SV=2
361	237	P53396|ACLY_HUMAN	P53396	ACLY	HUMAN	175.12	21	14	15	7	4	12064	9629.1	4036	2020.9	22	22	23	20	13	6	Carbamidomethylation	120839	ATP-citrate synthase OS=Homo sapiens OX=9606 GN=ACLY PE=1 SV=3
265	402	P32119|PRDX2_HUMAN	P32119	PRDX2	HUMAN	175.08	42	42	42	38	42	18527	21455	6520.3	12820	11	10	27	26	23	20	Deamidation (NQ); Acetylation (Protein N-term)	21892	Peroxiredoxin-2 OS=Homo sapiens OX=9606 GN=PRDX2 PE=1 SV=5
34	861	A0M8Q6|IGLC7_HUMAN	A0M8Q6	IGLC7	HUMAN	174.96	60	51	60	51	51	61198	45784	25577	22393	5	2	238	264	191	226	Carbamidomethylation; Carbamylation; Deamidation (NQ); Acetylation (Protein N-term)	11254	Immunoglobulin lambda constant 7 OS=Homo sapiens OX=9606 GN=IGLC7 PE=1 SV=3
393	239	O75955|FLOT1_HUMAN	O75955	FLOT1	HUMAN	172.85	35	25	20	24	20	9156.3	7217.6	9908.6	5999.1	13	13	14	13	15	11	Deamidation (NQ)	47355	Flotillin-1 OS=Homo sapiens OX=9606 GN=FLOT1 PE=1 SV=3
327	373	Q92930|RAB8B_HUMAN	Q92930	RAB8B	HUMAN	172.77	43	34	31	28	28	5033.6	2779.1	2451.2	3827	10	5	21	13	19	21	Carbamylation; Deamidation (NQ); Acetylation (Protein N-term)	23584	Ras-related protein Rab-8B OS=Homo sapiens OX=9606 GN=RAB8B PE=1 SV=2
309	265	P08174|DAF_HUMAN	P08174	DAF	HUMAN	172.5	34	24	26	21	34	44059	25575	21539	15639	12	12	21	27	16	17	Carbamidomethylation; Deamidation (NQ)	41400	Complement decay-accelerating factor OS=Homo sapiens OX=9606 GN=CD55 PE=1 SV=4
284	480	P62834|RAP1A_HUMAN	P62834	RAP1A	HUMAN	172.06	45	45	34	38	38	5528.4	1943.3	800.38	1804.6	11	2	21	20	23	26	Carbamidomethylation; Carbamylation; Acetylation (Protein N-term)	20987	Ras-related protein Rap-1A OS=Homo sapiens OX=9606 GN=RAP1A PE=1 SV=1
503	729	P25815|S100P_HUMAN	P25815	S100P	HUMAN	171.74	85	56	82	53	48	24107	21551	12255	3411.7	7	7	12	12	7	6	Carbamidomethylation; Carbamylation; Deamidation (NQ); Acetylation (Protein N-term)	10400	Protein S100-P OS=Homo sapiens OX=9606 GN=S100P PE=1 SV=2
271	281	P23284|PPIB_HUMAN	P23284	PPIB	HUMAN	171.54	52	49	49	49	52	30147	42754	22375	24302	11	11	25	24	21	24	Carbamidomethylation; Carbamylation; Deamidation (NQ); Oxidation (M); Acetylation (Protein N-term)	23743	Peptidyl-prolyl cis-trans isomerase B OS=Homo sapiens OX=9606 GN=PPIB PE=1 SV=2
334	455	P09758|TACD2_HUMAN	P09758	TACD2	HUMAN	171.43	26	26	23	23	23	38614	30119	8659.2	11617	9	9	23	17	13	19	Carbamidomethylation; Oxidation (M)	35709	Tumor-associated calcium signal transducer 2 OS=Homo sapiens OX=9606 GN=TACSTD2 PE=1 SV=3
394	247	P07384|CAN1_HUMAN	P07384	CAN1	HUMAN	171.04	29	15	14	17	20	7911.9	27082	26206	8708.7	17	17	11	12	14	16	Carbamidomethylation; Deamidation (NQ); Acetylation (Protein N-term)	81890	Calpain-1 catalytic subunit OS=Homo sapiens OX=9606 GN=CAPN1 PE=1 SV=1
317	371	P61026|RAB10_HUMAN	P61026	RAB10	HUMAN	171	39	34	31	26	32	6091.5	13272	12000	8593.9	9	5	23	17	18	21	Carbamylation; Deamidation (NQ); Acetylation (Protein N-term)	22541	Ras-related protein Rab-10 OS=Homo sapiens OX=9606 GN=RAB10 PE=1 SV=1
547	322	P21980|TGM2_HUMAN	P21980	TGM2	HUMAN	170.87	18	13	13	0	0	6023	7220.1			13	13	16	14	0	0	Carbamidomethylation; Carbamylation; Deamidation (NQ); Acetylation (Protein N-term)	77329	Protein-glutamine gamma-glutamyltransferase 2 OS=Homo sapiens OX=9606 GN=TGM2 PE=1 SV=2
297	711	P35326|SPR2A_HUMAN	P35326	SPR2A	HUMAN	170.8	90	78	78	90	90	546.4	1135.3	713.4	1297	6	1	16	15	30	24	Carbamidomethylation; Carbamylation; Deamidation (NQ); Acetylation (Protein N-term)	7965	Small proline-rich protein 2A OS=Homo sapiens OX=9606 GN=SPRR2A PE=1 SV=1
450	805	P14555|PA2GA_HUMAN	P14555	PA2GA	HUMAN	170.79	36	35	23	35	36	4655.7	9323.8	28565	32703	7	7	9	7	13	16	Carbamidomethylation	16083	Phospholipase A2 membrane associated OS=Homo sapiens OX=9606 GN=PLA2G2A PE=1 SV=2
341	204	P40926|MDHM_HUMAN	P40926	MDHM	HUMAN	170.7	48	32	41	42	31	9833.8	22325	14531	9726.4	13	13	16	18	21	13	Carbamidomethylation; Deamidation (NQ)	35503	Malate dehydrogenase mitochondrial OS=Homo sapiens OX=9606 GN=MDH2 PE=1 SV=3
177	365	Q71DI3|H32_HUMAN	Q71DI3	H32	HUMAN	170.6	66	66	62	32	25	0	654.6			11	1	45	43	45	39	Carbamidomethylation; Carbamylation; Deamidation (NQ); Oxidation (M); Acetylation (Protein N-term)	15388	Histone H3.2 OS=Homo sapiens OX=9606 GN=H3C15 PE=1 SV=3
276	475	Q14CN4|K2C72_HUMAN	Q14CN4	K2C72	HUMAN	170.25	18	12	6	11	9	1174.5	639.88	0	804.8	10	3	17	12	35	28	Carbamylation; Acetylation (Protein N-term)	55877	Keratin type II cytoskeletal 72 OS=Homo sapiens OX=9606 GN=KRT72 PE=1 SV=2
289	399	P84095|RHOG_HUMAN	P84095	RHOG	HUMAN	170.12	58	51	35	52	43	23454	16635	20693	18536	10	9	24	20	27	17	Carbamidomethylation; Carbamylation; Deamidation (NQ)	21308	Rho-related GTP-binding protein RhoG OS=Homo sapiens OX=9606 GN=RHOG PE=1 SV=1
418	487	Q9NQ84|GPC5C_HUMAN	Q9NQ84	GPC5C	HUMAN	169.47	21	18	21	15	15	24888	17059	6578.6	5989.2	7	7	14	13	9	13	Carbamylation; Deamidation (NQ); Oxidation (M)	48193	G-protein coupled receptor family C group 5 member C OS=Homo sapiens OX=9606 GN=GPRC5C PE=1 SV=2
420	511	P28799|GRN_HUMAN	P28799	GRN	HUMAN	169.22	13	9	10	13	8	5580.6	11998	3417.6	7472.8	7	7	14	13	16	6	Carbamidomethylation; Oxidation (M)	63545	Progranulin OS=Homo sapiens OX=9606 GN=GRN PE=1 SV=2
170	366	P68431|H31_HUMAN	P68431	H31	HUMAN	169.13	66	66	62	55	49	257.91	0	3639.2	893.23	11	1	45	43	50	40	Carbamidomethylation; Carbamylation; Deamidation (NQ); Oxidation (M); Acetylation (Protein N-term)	15404	Histone H3.1 OS=Homo sapiens OX=9606 GN=H3C1 PE=1 SV=2
487	244	Q96TA1|NIBA2_HUMAN	Q96TA1	NIBA2	HUMAN	168.89	20	14	13	10	10	6166.7	6951	9446.7	5492.9	13	13	10	9	11	8		84138	Protein Niban 2 OS=Homo sapiens OX=9606 GN=NIBAN2 PE=1 SV=3
385	350	Q9UHA7|IL36A_HUMAN	Q9UHA7	IL36A	HUMAN	168.77	74	65	42	52	30	14447	3272.9	10213	13145	11	11	14	9	20	12	Carbamidomethylation; Deamidation (NQ); Oxidation (M)	17684	Interleukin-36 alpha OS=Homo sapiens OX=9606 GN=IL36A PE=1 SV=1
294	262	Q04917|1433F_HUMAN	Q04917	1433F	HUMAN	168.5	53	40	44	32	41	9431.1	10217	1429	4643.2	14	9	21	23	18	24	Carbamidomethylation; Carbamylation; Acetylation (Protein N-term)	28219	14-3-3 protein eta OS=Homo sapiens OX=9606 GN=YWHAH PE=1 SV=4
273	253	P61981|1433G_HUMAN	P61981	1433G	HUMAN	168.16	50	34	39	39	46	4680.4	6993.3	9233.1	9371.8	14	7	22	24	22	26	Carbamidomethylation; Carbamylation; Oxidation (M); Acetylation (Protein N-term)	28303	14-3-3 protein gamma OS=Homo sapiens OX=9606 GN=YWHAG PE=1 SV=2
221	465	P15941|MUC1_HUMAN	P15941	MUC1	HUMAN	168.06	8	8	8	7	7	39426	31975	7927.7	12361	8	8	43	39	17	24	Carbamylation; Deamidation (NQ); Oxidation (M)	122102	Mucin-1 OS=Homo sapiens OX=9606 GN=MUC1 PE=1 SV=3
222	607	Q99456|K1C12_HUMAN	Q99456	K1C12	HUMAN	167.97	17	11	9	12	9	0	721.61	0	1053.7	10	4	16	17	41	49	Carbamylation; Deamidation (NQ); Oxidation (M); Acetylation (Protein N-term)	53511	Keratin type I cytoskeletal 12 OS=Homo sapiens OX=9606 GN=KRT12 PE=1 SV=1
157	610	Q6FI13|H2A2A_HUMAN	Q6FI13	H2A2A	HUMAN	167.89	58	58	58	58	35	2034.8	0	0		8	1	57	47	37	45	Carbamylation; Deamidation (NQ); Oxidation (M); Acetylation (Protein N-term)	14095	Histone H2A type 2-A OS=Homo sapiens OX=9606 GN=H2AC18 PE=1 SV=3
157	634	Q16777|H2A2C_HUMAN	Q16777	H2A2C	HUMAN	167.89	58	58	58	58	36	2034.8	0	0		8	1	57	47	37	45	Carbamylation; Deamidation (NQ); Oxidation (M); Acetylation (Protein N-term)	13988	Histone H2A type 2-C OS=Homo sapiens OX=9606 GN=H2AC20 PE=1 SV=4
400	225	Q7L576|CYFP1_HUMAN	Q7L576	CYFP1	HUMAN	167.78	11	9	6	6	4	1100.7	0	897.84	700.23	13	2	16	11	15	10	Carbamidomethylation; Deamidation (NQ)	145182	Cytoplasmic FMR1-interacting protein 1 OS=Homo sapiens OX=9606 GN=CYFIP1 PE=1 SV=1
272	712	P31949|S10AB_HUMAN	P31949	S10AB	HUMAN	167.75	56	56	56	56	56	41012	58468	76848	58876	7	7	21	23	26	24	Carbamidomethylation; Carbamylation; Deamidation (NQ); Acetylation (Protein N-term)	11740	Protein S100-A11 OS=Homo sapiens OX=9606 GN=S100A11 PE=1 SV=2
165	595	P09228|CYTT_HUMAN	P09228	CYTT	HUMAN	167.62	54	43	54	46	43	10150	7268.2	5732.2	1728.5	8	4	40	60	40	42	Carbamidomethylation; Carbamylation; Deamidation (NQ); Oxidation (M); Acetylation (Protein N-term)	16445	Cystatin-SA OS=Homo sapiens OX=9606 GN=CST2 PE=1 SV=1
62	1045	P59665|DEF1_HUMAN	P59665	DEF1	HUMAN	167.59	29	28	29	29	29	5870.8	12391	2645.4	3655.5	6	2	125	141	127	143	Carbamidomethylation; Carbamylation; Deamidation (NQ); Oxidation (M); Acetylation (Protein N-term)	10201	Neutrophil defensin 1 OS=Homo sapiens OX=9606 GN=DEFA1 PE=1 SV=1
423	424	P52566|GDIR2_HUMAN	P52566	GDIR2	HUMAN	167.32	63	41	59	51	58	18354	20004	17417	27212	12	12	8	17	10	13	Carbamidomethylation; Oxidation (M); Acetylation (Protein N-term)	22988	Rho GDP-dissociation inhibitor 2 OS=Homo sapiens OX=9606 GN=ARHGDIB PE=1 SV=3
350	291	P09429|HMGB1_HUMAN	P09429	HMGB1	HUMAN	167.28	53	40	38	42	47	22414	17323	8557.6	10276	13	11	17	18	16	16	Carbamidomethylation; Deamidation (NQ); Oxidation (M)	24894	High mobility group protein B1 OS=Homo sapiens OX=9606 GN=HMGB1 PE=1 SV=3
683	248	P55268|LAMB2_HUMAN	P55268	LAMB2	HUMAN	167.13	9	6	6	0	0	2867	1900.1			12	12	9	10	0	0	Carbamidomethylation	195980	Laminin subunit beta-2 OS=Homo sapiens OX=9606 GN=LAMB2 PE=1 SV=2
378	695	Q96FQ6|S10AG_HUMAN	Q96FQ6	S10AG	HUMAN	166.86	58	58	58	58	50	39352	20984	19821	14003	7	7	19	14	11	14	Carbamidomethylation; Carbamylation; Deamidation (NQ); Acetylation (Protein N-term)	11801	Protein S100-A16 OS=Homo sapiens OX=9606 GN=S100A16 PE=1 SV=1
479	369	P40925|MDHC_HUMAN	P40925	MDHC	HUMAN	166.77	28	26	24	17	19	17972	13495	6544.3	9331.8	8	8	13	9	8	9	Carbamidomethylation	36426	Malate dehydrogenase cytoplasmic OS=Homo sapiens OX=9606 GN=MDH1 PE=1 SV=4
357	347	P22392|NDKB_HUMAN	P22392	NDKB	HUMAN	166.71	62	50	49	55	43	4307.1	9428.1	4718.1	5079	10	5	20	20	12	12	Carbamidomethylation; Deamidation (NQ); Oxidation (M)	17298	Nucleoside diphosphate kinase B OS=Homo sapiens OX=9606 GN=NME2 PE=1 SV=1
226	658	Q3SY84|K2C71_HUMAN	Q3SY84	K2C71	HUMAN	166.6	10	8	7	6	6		0			7	1	20	21	37	39	Carbamylation; Deamidation (NQ); Acetylation (Protein N-term)	57292	Keratin type II cytoskeletal 71 OS=Homo sapiens OX=9606 GN=KRT71 PE=1 SV=3
281	590	P22532|SPR2D_HUMAN	P22532	SPR2D	HUMAN	166.16	90	78	78	90	90			0	1503.1	6	1	19	16	29	27	Carbamidomethylation; Carbamylation; Deamidation (NQ); Acetylation (Protein N-term)	7905	Small proline-rich protein 2D OS=Homo sapiens OX=9606 GN=SPRR2D PE=2 SV=2
408	214	P00352|AL1A1_HUMAN	P00352	AL1A1	HUMAN	165.98	36	33	24	17	8	15289	6177.8	3785.8	1158.8	15	13	18	15	11	6	Carbamidomethylation; Deamidation (NQ); Acetylation (Protein N-term)	54862	Retinal dehydrogenase 1 OS=Homo sapiens OX=9606 GN=ALDH1A1 PE=1 SV=2
524	215	Q15080|NCF4_HUMAN	Q15080	NCF4	HUMAN	165.87	50	32	25	19	14	9596.2	6224.5	6137.4	424.9	15	15	12	10	7	4	Carbamidomethylation	39032	Neutrophil cytosol factor 4 OS=Homo sapiens OX=9606 GN=NCF4 PE=1 SV=2
379	376	P40121|CAPG_HUMAN	P40121	CAPG	HUMAN	165.64	27	27	27	24	22	28978	8823.5	6834.6	7211.1	9	9	19	14	11	13	Oxidation (M)	38499	Macrophage-capping protein OS=Homo sapiens OX=9606 GN=CAPG PE=1 SV=2
324	354	P30044|PRDX5_HUMAN	P30044	PRDX5	HUMAN	165.59	56	36	30	52	52	3028.9	12898	13678	13338	10	10	10	20	22	24	Carbamidomethylation; Deamidation (NQ)	22086	Peroxiredoxin-5 mitochondrial OS=Homo sapiens OX=9606 GN=PRDX5 PE=1 SV=4
435	245	Q6ZN66|GBP6_HUMAN	Q6ZN66	GBP6	HUMAN	165.56	21	14	9	18	18	4326.8	3792.2	12785	15501	12	12	8	6	14	19	Carbamidomethylation; Deamidation (NQ)	72427	Guanylate-binding protein 6 OS=Homo sapiens OX=9606 GN=GBP6 PE=2 SV=1
253	639	P31997|CEAM8_HUMAN	P31997	CEAM8	HUMAN	165.48	19	19	19	19	19	50174	30286	27175	32405	5	4	22	23	26	29	Carbamidomethylation; Carbamylation; Deamidation (NQ); Acetylation (Protein N-term)	38154	Carcinoembryonic antigen-related cell adhesion molecule 8 OS=Homo sapiens OX=9606 GN=CEACAM8 PE=1 SV=2
61	1046	P59666|DEF3_HUMAN	P59666	DEF3	HUMAN	165.25	29	29	28	28	29	16765	19123	2433.7	10338	6	2	126	141	127	145	Carbamidomethylation; Carbamylation; Deamidation (NQ); Oxidation (M); Acetylation (Protein N-term)	10245	Neutrophil defensin 3 OS=Homo sapiens OX=9606 GN=DEFA3 PE=1 SV=1
381	320	P04792|HSPB1_HUMAN	P04792	HSPB1	HUMAN	164.94	58	38	21	39	44	15819	20246	41223	14005	12	12	16	10	15	16	Carbamylation; Deamidation (NQ)	22783	Heat shock protein beta-1 OS=Homo sapiens OX=9606 GN=HSPB1 PE=1 SV=2
469	359	P00491|PNPH_HUMAN	P00491	PNPH	HUMAN	164.84	34	25	28	16	21	5640.8	11707	6836.3	6025.4	8	8	13	20	3	5	Deamidation (NQ); Oxidation (M)	32118	Purine nucleoside phosphorylase OS=Homo sapiens OX=9606 GN=PNP PE=1 SV=2
326	452	P09972|ALDOC_HUMAN	P09972	ALDOC	HUMAN	164.84	30	24	27	21	22	4690.5	3338.5	2902.8	10358	9	5	22	14	16	21	Carbamidomethylation; Deamidation (NQ)	39456	Fructose-bisphosphate aldolase C OS=Homo sapiens OX=9606 GN=ALDOC PE=1 SV=2
353	292	O15144|ARPC2_HUMAN	O15144	ARPC2	HUMAN	164.32	34	28	31	30	28	28447	16554	7722.2	8629.5	12	12	21	16	14	14	Carbamidomethylation	34333	Actin-related protein 2/3 complex subunit 2 OS=Homo sapiens OX=9606 GN=ARPC2 PE=1 SV=1
354	252	P31150|GDIA_HUMAN	P31150	GDIA	HUMAN	164.28	32	29	23	17	18	2707.5	2465.4	0	371.37	12	5	19	20	13	12	Carbamidomethylation; Deamidation (NQ); Oxidation (M)	50583	Rab GDP dissociation inhibitor alpha OS=Homo sapiens OX=9606 GN=GDI1 PE=1 SV=2
508	356	Q687X5|STEA4_HUMAN	Q687X5	STEA4	HUMAN	164.27	23	20	13	20	15	15162	14052	5863.1	6240.3	8	8	11	10	8	6	Carbamidomethylation; Oxidation (M)	51981	Metalloreductase STEAP4 OS=Homo sapiens OX=9606 GN=STEAP4 PE=1 SV=1
449	250	Q99816|TS101_HUMAN	Q99816	TS101	HUMAN	164.1	37	35	27	23	14	13798	4098.8	2020.9	2086.2	13	13	16	12	10	7	Carbamylation; Deamidation (NQ); Acetylation (Protein N-term)	43944	Tumor susceptibility gene 101 protein OS=Homo sapiens OX=9606 GN=TSG101 PE=1 SV=2
370	422	P47929|LEG7_HUMAN	P47929	LEG7	HUMAN	164	70	41	51	47	68	8035.1	10803	22442	13908	8	8	13	10	19	19	Carbamidomethylation; Carbamylation; Deamidation (NQ)	15075	Galectin-7 OS=Homo sapiens OX=9606 GN=LGALS7 PE=1 SV=2
231	580	P60953|CDC42_HUMAN	P60953	CDC42	HUMAN	163.89	42	31	31	42	42	26952	29457	42530	25634	7	6	24	31	32	27	Carbamidomethylation; Carbamylation; Deamidation (NQ); Acetylation (Protein N-term)	21259	Cell division control protein 42 homolog OS=Homo sapiens OX=9606 GN=CDC42 PE=1 SV=2
491	308	O14638|ENPP3_HUMAN	O14638	ENPP3	HUMAN	163.73	14	13	4	5	6	9478.3	3196.3	1969.4	1204.1	11	11	15	10	5	7	Carbamidomethylation; Deamidation (NQ); Oxidation (M); Acetylation (Protein N-term)	100124	Ectonucleotide pyrophosphatase/phosphodiesterase family member 3 OS=Homo sapiens OX=9606 GN=ENPP3 PE=1 SV=2
467	289	P13637|AT1A3_HUMAN	P13637	AT1A3	HUMAN	163.56	12	9	8	8	9				505.09	10	1	16	10	7	8	Carbamidomethylation; Carbamylation	111748	Sodium/potassium-transporting ATPase subunit alpha-3 OS=Homo sapiens OX=9606 GN=ATP1A3 PE=1 SV=3
521	268	P12109|CO6A1_HUMAN	P12109	CO6A1	HUMAN	163.36	14	11	11	2	0	11673	8336.8	515.69		13	13	19	12	2	0	Carbamidomethylation; Carbamylation; Deamidation (NQ)	108529	Collagen alpha-1(VI) chain OS=Homo sapiens OX=9606 GN=COL6A1 PE=1 SV=3
528	269	Q9BZQ8|NIBA1_HUMAN	Q9BZQ8	NIBA1	HUMAN	163.34	13	11	8	4	9	7723.5	5423.5	4727.6	5799	13	13	12	8	4	8	Carbamidomethylation	103135	Protein Niban 1 OS=Homo sapiens OX=9606 GN=NIBAN1 PE=1 SV=1
461	241	O00159|MYO1C_HUMAN	O00159	MYO1C	HUMAN	163.03	15	10	7	8	11	5823	2158.9	3105.8	6800.2	14	14	13	5	7	17	Carbamidomethylation; Deamidation (NQ)	121682	Unconventional myosin-Ic OS=Homo sapiens OX=9606 GN=MYO1C PE=1 SV=4
100	468	P11678|PERE_HUMAN	P11678	PERE	HUMAN	162.97	12	7	9	9	8	5072.2	8604.6	13107	16368	9	4	34	66	112	103	Carbamidomethylation; Carbamylation; Deamidation (NQ)	81040	Eosinophil peroxidase OS=Homo sapiens OX=9606 GN=EPX PE=1 SV=2
397	295	P07195|LDHB_HUMAN	P07195	LDHB	HUMAN	162.96	33	33	22	11	15	11505	4803.1	2696.7	1986	9	8	17	14	12	10	Carbamidomethylation; Carbamylation; Deamidation (NQ)	36639	L-lactate dehydrogenase B chain OS=Homo sapiens OX=9606 GN=LDHB PE=1 SV=2
593	345	P02748|CO9_HUMAN	P02748	CO9	HUMAN	162.48	18	18	14	6	6	12206	4965.2	1106.5	1535.5	9	9	11	8	3	3	Carbamidomethylation; Deamidation (NQ)	63173	Complement component C9 OS=Homo sapiens OX=9606 GN=C9 PE=1 SV=2
336	282	P08758|ANXA5_HUMAN	P08758	ANXA5	HUMAN	162.46	41	29	21	30	26	22327	14890	16049	9673.5	13	13	23	13	20	14	Carbamylation	35937	Annexin A5 OS=Homo sapiens OX=9606 GN=ANXA5 PE=1 SV=2
411	340	P32942|ICAM3_HUMAN	P32942	ICAM3	HUMAN	161.99	19	17	11	10	11	19984	17690	5600.2	5523.4	9	9	15	15	9	11	Carbamidomethylation; Carbamylation; Deamidation (NQ)	59541	Intercellular adhesion molecule 3 OS=Homo sapiens OX=9606 GN=ICAM3 PE=1 SV=2
311	514	P11169|GTR3_HUMAN	P11169	GTR3	HUMAN	161.97	16	16	16	13	14	19406	15941	5661.8	27579	8	8	26	18	13	23	Carbamylation; Deamidation (NQ); Oxidation (M); Acetylation (Protein N-term)	53924	Solute carrier family 2 facilitated glucose transporter member 3 OS=Homo sapiens OX=9606 GN=SLC2A3 PE=1 SV=1
437	412	P52907|CAZA1_HUMAN	P52907	CAZA1	HUMAN	161.94	34	34	31	27	24	6969.6	6798.4	4520.1	4148.8	9	6	12	13	14	8	Carbamidomethylation; Deamidation (NQ); Acetylation (Protein N-term)	32923	F-actin-capping protein subunit alpha-1 OS=Homo sapiens OX=9606 GN=CAPZA1 PE=1 SV=3
432	273	Q05655|KPCD_HUMAN	Q05655	KPCD	HUMAN	161.89	21	18	14	15	8	11587	8385	5294.2	2949.9	14	14	15	11	13	8	Carbamidomethylation; Carbamylation; Deamidation (NQ)	77505	Protein kinase C delta type OS=Homo sapiens OX=9606 GN=PRKCD PE=1 SV=2
490	284	O75874|IDHC_HUMAN	O75874	IDHC	HUMAN	161.5	29	19	19	18	11	7650.9	3038.1	4988	1816.8	11	10	9	12	10	6	Carbamidomethylation; Acetylation (Protein N-term)	46659	Isocitrate dehydrogenase [NADP] cytoplasmic OS=Homo sapiens OX=9606 GN=IDH1 PE=1 SV=2
337	420	Q15286|RAB35_HUMAN	Q15286	RAB35	HUMAN	161.32	42	38	38	32	32	6162.9	3811.1	2927.5	2139.9	10	8	22	14	15	20	Carbamidomethylation; Carbamylation; Deamidation (NQ); Acetylation (Protein N-term)	23025	Ras-related protein Rab-35 OS=Homo sapiens OX=9606 GN=RAB35 PE=1 SV=1
572	263	P12110|CO6A2_HUMAN	P12110	CO6A2	HUMAN	161.24	14	11	11	0	0	12854	47831			13	13	15	12	0	0	Carbamylation; Deamidation (NQ)	108579	Collagen alpha-2(VI) chain OS=Homo sapiens OX=9606 GN=COL6A2 PE=1 SV=4
480	251	P23526|SAHH_HUMAN	P23526	SAHH	HUMAN	161.15	32	28	16	18	15	11636	4541.7	5297.9	2289.2	13	12	15	7	9	8		47716	Adenosylhomocysteinase OS=Homo sapiens OX=9606 GN=AHCY PE=1 SV=4
475	264	Q9ULV4|COR1C_HUMAN	Q9ULV4	COR1C	HUMAN	160.95	27	19	19	12	11	10018	5555.2	5008.6	367.87	13	12	16	11	6	7	Carbamidomethylation; Carbamylation; Deamidation (NQ)	53249	Coronin-1C OS=Homo sapiens OX=9606 GN=CORO1C PE=1 SV=1
687	493	P07476|INVO_HUMAN	P07476	INVO	HUMAN	160.6	11	10	0	11	7	367.64		5134.6	3089	6	6	5	0	7	7	Deamidation (NQ)	68479	Involucrin OS=Homo sapiens OX=9606 GN=IVL PE=1 SV=2
564	357	P19971|TYPH_HUMAN	P19971	TYPH	HUMAN	160.53	22	17	18	22	8	5513.6	4178.3	7585.5	1437.3	8	8	9	8	8	3	Carbamidomethylation	49956	Thymidine phosphorylase OS=Homo sapiens OX=9606 GN=TYMP PE=1 SV=2
636	384	O43866|CD5L_HUMAN	O43866	CD5L	HUMAN	160.38	34	34	18	12	10	37128	4457	20088	579.56	10	10	10	5	5	2	Carbamidomethylation	38088	CD5 antigen-like OS=Homo sapiens OX=9606 GN=CD5L PE=1 SV=1
522	271	P50990|TCPQ_HUMAN	P50990	TCPQ	HUMAN	160.3	22	17	17	15	11	2756.4	4427.2	4546.7	3044.2	11	11	10	9	7	7		59621	T-complex protein 1 subunit theta OS=Homo sapiens OX=9606 GN=CCT8 PE=1 SV=4
447	236	P29350|PTN6_HUMAN	P29350	PTN6	HUMAN	159.1	30	20	13	21	14	4656.9	5652	19851	6149.5	15	15	12	11	13	9	Carbamidomethylation; Deamidation (NQ); Oxidation (M)	67561	Tyrosine-protein phosphatase non-receptor type 6 OS=Homo sapiens OX=9606 GN=PTPN6 PE=1 SV=1
218	343	P63096|GNAI1_HUMAN	P63096	GNAI1	HUMAN	158.99	25	20	20	22	19	776.95	868.59			8	1	38	28	32	29	Carbamidomethylation; Carbamylation; Deamidation (NQ); Oxidation (M)	40361	Guanine nucleotide-binding protein G(i) subunit alpha-1 OS=Homo sapiens OX=9606 GN=GNAI1 PE=1 SV=2
103	694	Q8TAX7|MUC7_HUMAN	Q8TAX7	MUC7	HUMAN	158.99	17	12	10	15	16	55473	37334	47399	114830	8	8	32	32	151	86	Carbamidomethylation; Carbamylation; Deamidation (NQ); Oxidation (M); Acetylation (Protein N-term)	39159	Mucin-7 OS=Homo sapiens OX=9606 GN=MUC7 PE=1 SV=2
211	1049	Q07654|TFF3_HUMAN	Q07654	TFF3	HUMAN	158.99	40	40	40	40	40	56800	65026	58522	42840	4	4	34	35	29	38	Carbamidomethylation; Carbamylation; Deamidation (NQ)	10181	Trefoil factor 3 OS=Homo sapiens OX=9606 GN=TFF3 PE=1 SV=2
472	794	Q14210|LY6D_HUMAN	Q14210	LY6D	HUMAN	158.65	55	54	55	45	45	53215	46462	20317	9681.4	6	6	10	13	9	9	Carbamidomethylation; Carbamylation; Deamidation (NQ)	13286	Lymphocyte antigen 6D OS=Homo sapiens OX=9606 GN=LY6D PE=1 SV=1
371	418	P61006|RAB8A_HUMAN	P61006	RAB8A	HUMAN	158.42	39	31	31	21	29	1380.3	1090.2	606.25	1826.5	8	3	17	11	16	17	Carbamylation; Deamidation (NQ); Acetylation (Protein N-term)	23668	Ras-related protein Rab-8A OS=Homo sapiens OX=9606 GN=RAB8A PE=1 SV=1
233	683	P10599|THIO_HUMAN	P10599	THIO	HUMAN	158.27	66	66	51	66	66	57588	67261	74930	36111	8	8	17	24	32	39	Carbamidomethylation; Carbamylation; Deamidation (NQ); Oxidation (M); Acetylation (Protein N-term)	11737	Thioredoxin OS=Homo sapiens OX=9606 GN=TXN PE=1 SV=3
497	471	P30086|PEBP1_HUMAN	P30086	PEBP1	HUMAN	158.22	50	40	40	41	41	19242	11804	7080.5	8989.7	8	8	11	10	7	9	Carbamidomethylation; Carbamylation	21057	Phosphatidylethanolamine-binding protein 1 OS=Homo sapiens OX=9606 GN=PEBP1 PE=1 SV=3
343	405	P20742|PZP_HUMAN	P20742	PZP	HUMAN	158.16	5	5	4	2	3	2000.4	1917.7			7	1	22	25	8	12	Carbamylation; Deamidation (NQ)	163862	Pregnancy zone protein OS=Homo sapiens OX=9606 GN=PZP PE=1 SV=4
534	316	P50993|AT1A2_HUMAN	P50993	AT1A2	HUMAN	158.11	11	8	7	8	6			0		9	1	10	8	7	6	Carbamidomethylation	112265	Sodium/potassium-transporting ATPase subunit alpha-2 OS=Homo sapiens OX=9606 GN=ATP1A2 PE=1 SV=1
185	615	Q7L7L0|H2A3_HUMAN	Q7L7L0	H2A3	HUMAN	157.88	58	58	35	35	35	1984.6	2800.7	2188.5	2765.9	7	1	45	41	35	44	Carbamylation; Deamidation (NQ); Acetylation (Protein N-term)	14121	Histone H2A type 3 OS=Homo sapiens OX=9606 GN=H2AW PE=1 SV=3
185	616	Q93077|H2A1C_HUMAN	Q93077	H2A1C	HUMAN	157.88	58	58	35	35	35	1984.6	2800.7	2188.5	2765.9	7	1	45	41	35	44	Carbamylation; Deamidation (NQ); Acetylation (Protein N-term)	14105	Histone H2A type 1-C OS=Homo sapiens OX=9606 GN=H2AC6 PE=1 SV=3
185	617	P04908|H2A1B_HUMAN	P04908	H2A1B	HUMAN	157.88	58	58	35	35	35	1984.6	2800.7	2188.5	2765.9	7	1	45	41	35	44	Carbamylation; Deamidation (NQ); Acetylation (Protein N-term)	14135	Histone H2A type 1-B/E OS=Homo sapiens OX=9606 GN=H2AC4 PE=1 SV=2
270	672	A0A0B4J1V0|HV315_HUMAN	A0A0B4J1V0	HV315	HUMAN	157.6	41	41	41	41	37	8187.1	5050.5	4769.7	3600.9	8	4	23	27	21	23	Carbamylation; Deamidation (NQ)	12926	Immunoglobulin heavy variable 3-15 OS=Homo sapiens OX=9606 GN=IGHV3-15 PE=3 SV=1
184	450	P84243|H33_HUMAN	P84243	H33	HUMAN	157.3	56	56	55	25	25	0	781.98			9	1	41	41	44	39	Carbamidomethylation; Carbamylation; Deamidation (NQ); Oxidation (M); Acetylation (Protein N-term)	15328	Histone H3.3 OS=Homo sapiens OX=9606 GN=H3-3A PE=1 SV=2
495	396	P60981|DEST_HUMAN	P60981	DEST	HUMAN	157.1	56	33	39	42	33	6253.5	4821.6	5394.2	7180.5	8	7	8	9	9	11	Carbamidomethylation; Acetylation (Protein N-term)	18506	Destrin OS=Homo sapiens OX=9606 GN=DSTN PE=1 SV=3
112	609	P62987|RL40_HUMAN	P62987	RL40	HUMAN	156.89	46	37	46	37	37	45602	48908	38445	37672	6	6	73	75	72	61	Carbamylation; Deamidation (NQ)	14728	Ubiquitin-60S ribosomal protein L40 OS=Homo sapiens OX=9606 GN=UBA52 PE=1 SV=2
112	652	P62979|RS27A_HUMAN	P62979	RS27A	HUMAN	156.89	38	30	38	30	30	45602	48908	38445	37672	6	6	73	75	72	61	Carbamylation; Deamidation (NQ)	17965	Ubiquitin-40S ribosomal protein S27a OS=Homo sapiens OX=9606 GN=RPS27A PE=1 SV=2
112	715	P0CG47|UBB_HUMAN	P0CG47	UBB	HUMAN	156.89	26	21	26	21	21	45602	48908	38445	37672	6	6	73	75	72	61	Carbamylation; Deamidation (NQ)	25762	Polyubiquitin-B OS=Homo sapiens OX=9606 GN=UBB PE=1 SV=1
112	718	P0CG48|UBC_HUMAN	P0CG48	UBC	HUMAN	156.89	9	7	9	7	7	45602	48908	38445	37672	6	6	73	75	72	61	Carbamylation; Deamidation (NQ)	77039	Polyubiquitin-C OS=Homo sapiens OX=9606 GN=UBC PE=1 SV=3
113	596	P01780|HV307_HUMAN	P01780	HV307	HUMAN	156.8	47	47	36	42	42	26064	6576	11650	11437	8	3	95	89	47	45	Carbamidomethylation; Carbamylation; Deamidation (NQ); Oxidation (M); Acetylation (Protein N-term)	12943	Immunoglobulin heavy variable 3-7 OS=Homo sapiens OX=9606 GN=IGHV3-7 PE=1 SV=2
313	319	Q9H0U4|RAB1B_HUMAN	Q9H0U4	RAB1B	HUMAN	156.63	52	31	35	40	52	3275.4	5097.8	6462.8	5279.6	9	3	18	13	22	27	Carbamylation; Deamidation (NQ); Oxidation (M); Acetylation (Protein N-term)	22171	Ras-related protein Rab-1B OS=Homo sapiens OX=9606 GN=RAB1B PE=1 SV=1
535	272	P55786|PSA_HUMAN	P55786	PSA	HUMAN	156.45	20	17	10	3	1	9556.6	3594.7	1084.6	550.42	18	18	19	9	3	1		103276	Puromycin-sensitive aminopeptidase OS=Homo sapiens OX=9606 GN=NPEPPS PE=1 SV=2
362	274	P08631|HCK_HUMAN	P08631	HCK	HUMAN	156.44	23	16	16	16	20	2974.6	3185.2	4737.4	4758.7	12	8	14	19	13	16	Deamidation (NQ); Oxidation (M)	59600	Tyrosine-protein kinase HCK OS=Homo sapiens OX=9606 GN=HCK PE=1 SV=5
595	713	P21741|MK_HUMAN	P21741	MK	HUMAN	156.17	43	31	27	32	37	1278.6	2384.1	2271.4	5230.2	7	7	4	3	6	12	Carbamidomethylation	15585	Midkine OS=Homo sapiens OX=9606 GN=MDK PE=1 SV=1
201	565	Q7Z794|K2C1B_HUMAN	Q7Z794	K2C1B	HUMAN	155.89	12	6	5	9	8	516.75		1700.6	2282.6	8	4	24	26	47	46	Carbamylation; Deamidation (NQ); Acetylation (Protein N-term)	61901	Keratin type II cytoskeletal 1b OS=Homo sapiens OX=9606 GN=KRT77 PE=1 SV=3
550	435	O75828|CBR3_HUMAN	O75828	CBR3	HUMAN	155.33	32	13	13	26	24			1391.1	463.07	7	4	5	5	10	10	Carbamidomethylation; Deamidation (NQ)	30850	Carbonyl reductase [NADPH] 3 OS=Homo sapiens OX=9606 GN=CBR3 PE=1 SV=3
537	411	P00390|GSHR_HUMAN	P00390	GSHR	HUMAN	155.3	17	17	10	8	7	4506.8	5185.2	5346.3	1043	7	7	11	9	7	4	Carbamidomethylation; Deamidation (NQ)	56257	Glutathione reductase mitochondrial OS=Homo sapiens OX=9606 GN=GSR PE=1 SV=2
623	293	P11047|LAMC1_HUMAN	P11047	LAMC1	HUMAN	155.27	9	7	6	0	1	3134.1	3949.1		0	10	10	10	11	0	1	Carbamidomethylation; Carbamylation; Deamidation (NQ); Acetylation (Protein N-term)	177602	Laminin subunit gamma-1 OS=Homo sapiens OX=9606 GN=LAMC1 PE=1 SV=3
575	333	Q6UXY8|TMC5_HUMAN	Q6UXY8	TMC5	HUMAN	154.76	12	12	4	3	1	9936.6	4772.6	1303.1	267.8	10	10	18	6	2	1	Acetylation (Protein N-term)	114797	Transmembrane channel-like protein 5 OS=Homo sapiens OX=9606 GN=TMC5 PE=2 SV=3
561	328	Q9Y4G6|TLN2_HUMAN	Q9Y4G6	TLN2	HUMAN	154.59	5	4	2	3	2	744.97		0	2783.4	11	5	10	6	7	5	Carbamidomethylation; Carbamylation; Deamidation (NQ); Acetylation (Protein N-term)	271611	Talin-2 OS=Homo sapiens OX=9606 GN=TLN2 PE=1 SV=4
526	257	Q9H4A4|AMPB_HUMAN	Q9H4A4	AMPB	HUMAN	154.46	22	16	12	12	4	6918.3	3589.6	3314.6	581.38	12	12	13	9	7	4	Carbamidomethylation	72596	Aminopeptidase B OS=Homo sapiens OX=9606 GN=RNPEP PE=1 SV=2
421	415	P61106|RAB14_HUMAN	P61106	RAB14	HUMAN	154.37	52	40	27	34	24	5408.8	4828.2	3144.5	1414.2	11	9	17	7	13	12	Carbamidomethylation; Carbamylation; Deamidation (NQ); Acetylation (Protein N-term)	23897	Ras-related protein Rab-14 OS=Homo sapiens OX=9606 GN=RAB14 PE=1 SV=4
347	714	P35321|SPR1A_HUMAN	P35321	SPR1A	HUMAN	154.2	70	44	61	70	70	1873.7	4079.8	3795.4	3608.4	5	2	7	14	21	25	Carbamidomethylation; Carbamylation; Deamidation (NQ)	9877	Cornifin-A OS=Homo sapiens OX=9606 GN=SPRR1A PE=1 SV=2
391	720	P80511|S10AC_HUMAN	P80511	S10AC	HUMAN	154.18	53	36	21	22	51	14299	17818	51270	42127	8	8	8	5	13	28	Carbamylation	10575	Protein S100-A12 OS=Homo sapiens OX=9606 GN=S100A12 PE=1 SV=2
296	358	Q96DR5|BPIA2_HUMAN	Q96DR5	BPIA2	HUMAN	154.16	34	22	31	23	31	25896	25187	44004	37923	9	9	18	20	26	21	Carbamidomethylation; Carbamylation; Deamidation (NQ)	27011	BPI fold-containing family A member 2 OS=Homo sapiens OX=9606 GN=BPIFA2 PE=1 SV=2
433	464	P51148|RAB5C_HUMAN	P51148	RAB5C	HUMAN	153.96	39	33	39	34	34	3920.1	4358.5	3457.8	1966.7	7	4	9	13	14	11	Carbamylation; Deamidation (NQ)	23483	Ras-related protein Rab-5C OS=Homo sapiens OX=9606 GN=RAB5C PE=1 SV=2
457	398	P78324|SHPS1_HUMAN	P78324	SHPS1	HUMAN	153.82	20	17	15	7	17	7349.6	9083.7	3219.2	5864.3	9	9	14	14	4	11	Carbamidomethylation; Carbamylation	54967	Tyrosine-protein phosphatase non-receptor type substrate 1 OS=Homo sapiens OX=9606 GN=SIRPA PE=1 SV=2
422	280	P29992|GNA11_HUMAN	P29992	GNA11	HUMAN	153.56	32	32	22	20	15	6693.1	7387.8	2342.9	0	12	8	17	15	8	8	Carbamidomethylation; Carbamylation; Deamidation (NQ)	42123	Guanine nucleotide-binding protein subunit alpha-11 OS=Homo sapiens OX=9606 GN=GNA11 PE=1 SV=2
399	385	P08571|CD14_HUMAN	P08571	CD14	HUMAN	153.31	30	27	23	25	27	7484.6	10414	11167	14460	9	9	12	13	12	16	Carbamidomethylation	40076	Monocyte differentiation antigen CD14 OS=Homo sapiens OX=9606 GN=CD14 PE=1 SV=2
442	574	P11234|RALB_HUMAN	P11234	RALB	HUMAN	153.07	36	21	26	36	36	5801.9	552.8	9231.2	9536.3	9	6	7	11	11	17	Deamidation (NQ)	23409	Ras-related protein Ral-B OS=Homo sapiens OX=9606 GN=RALB PE=1 SV=1
613	673	O00602|FCN1_HUMAN	O00602	FCN1	HUMAN	152.85	17	17	15	8	11	40779	11415	52531	52520	6	6	7	8	4	4	Carbamidomethylation; Deamidation (NQ)	35078	Ficolin-1 OS=Homo sapiens OX=9606 GN=FCN1 PE=1 SV=2
507	361	Q15365|PCBP1_HUMAN	Q15365	PCBP1	HUMAN	152.82	33	30	23	24	27	5829.3	7222.5	4739.7	6181.1	8	6	8	8	9	10	Carbamidomethylation; Oxidation (M)	37498	Poly(rC)-binding protein 1 OS=Homo sapiens OX=9606 GN=PCBP1 PE=1 SV=2
624	296	P01031|CO5_HUMAN	P01031	CO5	HUMAN	152.82	7	7	3	1	1	6699.1	1947.4	0	539.48	10	10	14	4	2	2	Carbamidomethylation	188304	Complement C5 OS=Homo sapiens OX=9606 GN=C5 PE=1 SV=4
519	552	Q10588|BST1_HUMAN	Q10588	BST1	HUMAN	152.61	21	21	21	13	13	10475	10170	7250.3	7256.6	6	6	11	9	8	6	Carbamidomethylation; Carbamylation	35724	ADP-ribosyl cyclase/cyclic ADP-ribose hydrolase 2 OS=Homo sapiens OX=9606 GN=BST1 PE=1 SV=2
483	310	P49189|AL9A1_HUMAN	P49189	AL9A1	HUMAN	152.49	22	20	20	7	17	5956.6	3647.4	2459.3	4748.5	11	11	16	12	4	7	Carbamidomethylation; Acetylation (Protein N-term)	53802	4-trimethylaminobutyraldehyde dehydrogenase OS=Homo sapiens OX=9606 GN=ALDH9A1 PE=1 SV=3
375	368	P62820|RAB1A_HUMAN	P62820	RAB1A	HUMAN	152.41	40	19	28	29	40		1979.6	3627.8	3663.5	8	2	15	9	16	19	Carbamylation; Deamidation (NQ); Acetylation (Protein N-term)	22678	Ras-related protein Rab-1A OS=Homo sapiens OX=9606 GN=RAB1A PE=1 SV=3
445	283	P11216|PYGB_HUMAN	P11216	PYGB	HUMAN	152.13	14	9	9	6	10	1823.9	2338.9	1508.7	8601.1	11	6	13	12	8	12	Carbamidomethylation; Deamidation (NQ); Acetylation (Protein N-term)	96696	Glycogen phosphorylase brain form OS=Homo sapiens OX=9606 GN=PYGB PE=1 SV=5
583	334	Q9P265|DIP2B_HUMAN	Q9P265	DIP2B	HUMAN	151.94	7	6	6	2	3	3714.9	2796.9	893.96	935.29	9	8	8	10	4	4	Carbamidomethylation; Carbamylation	171491	Disco-interacting protein 2 homolog B OS=Homo sapiens OX=9606 GN=DIP2B PE=1 SV=3
444	307	P14625|ENPL_HUMAN	P14625	ENPL	HUMAN	151.56	21	15	9	13	10	4104.1	6891	7822.5	6302.6	14	13	13	9	12	11	Deamidation (NQ)	92469	Endoplasmin OS=Homo sapiens OX=9606 GN=HSP90B1 PE=1 SV=1
554	299	O94832|MYO1D_HUMAN	O94832	MYO1D	HUMAN	151.3	16	9	8	5	8	7610.2	6779.8	1713	2504.4	13	13	7	8	6	8	Carbamidomethylation; Deamidation (NQ)	116202	Unconventional myosin-Id OS=Homo sapiens OX=9606 GN=MYO1D PE=1 SV=2
148	600	A0A0B4J1X5|HV374_HUMAN	A0A0B4J1X5	HV374	HUMAN	151.14	47	47	47	34	44	14620	9283	5246.2	6678.2	7	3	60	67	41	34	Carbamidomethylation; Carbamylation; Deamidation (NQ); Oxidation (M); Acetylation (Protein N-term)	12840	Immunoglobulin heavy variable 3-74 OS=Homo sapiens OX=9606 GN=IGHV3-74 PE=3 SV=1
557	469	Q99828|CIB1_HUMAN	Q99828	CIB1	HUMAN	151.04	48	39	45	20	29	6729	11610	3431.1	4977.4	8	8	9	11	4	5	Carbamidomethylation; Deamidation (NQ)	21703	Calcium and integrin-binding protein 1 OS=Homo sapiens OX=9606 GN=CIB1 PE=1 SV=4
255	597	A0A0B4J1Y9|HV372_HUMAN	A0A0B4J1Y9	HV372	HUMAN	151	50	49	50	38	34	25691	25876	7966.4	6386.8	10	6	25	32	19	22	Carbamidomethylation; Carbamylation; Deamidation (NQ)	13203	Immunoglobulin heavy variable 3-72 OS=Homo sapiens OX=9606 GN=IGHV3-72 PE=3 SV=1
510	527	P62826|RAN_HUMAN	P62826	RAN	HUMAN	150.36	36	27	33	26	34	25411	16258	12051	12361	9	9	8	10	7	10	Carbamidomethylation; Deamidation (NQ); Acetylation (Protein N-term)	24423	GTP-binding nuclear protein Ran OS=Homo sapiens OX=9606 GN=RAN PE=1 SV=3
523	425	P22748|CAH4_HUMAN	P22748	CAH4	HUMAN	149.94	28	28	18	12	16	14146	8001.6	5237.7	3857.1	8	8	14	12	3	4	Carbamidomethylation	35032	Carbonic anhydrase 4 OS=Homo sapiens OX=9606 GN=CA4 PE=1 SV=2
529	277	P14550|AK1A1_HUMAN	P14550	AK1A1	HUMAN	149.91	43	37	17	24	14	3790.1	2804.8	5046.7	2349.7	12	12	13	7	8	4	Carbamidomethylation; Carbamylation; Deamidation (NQ); Oxidation (M); Acetylation (Protein N-term)	36573	Aldo-keto reductase family 1 member A1 OS=Homo sapiens OX=9606 GN=AKR1A1 PE=1 SV=3
407	393	Q08043|ACTN3_HUMAN	Q08043	ACTN3	HUMAN	149.72	10	6	7	8	5			380.08		9	1	15	15	13	7	Carbamidomethylation	103241	Alpha-actinin-3 OS=Homo sapiens OX=9606 GN=ACTN3 PE=1 SV=2
464	275	P38606|VATA_HUMAN	P38606	VATA	HUMAN	149.68	24	16	18	11	18	12003	9552	5032.4	2812.4	13	13	14	11	7	10	Carbamidomethylation; Deamidation (NQ)	68304	V-type proton ATPase catalytic subunit A OS=Homo sapiens OX=9606 GN=ATP6V1A PE=1 SV=2
425	372	Q96HE7|ERO1A_HUMAN	Q96HE7	ERO1A	HUMAN	149.62	21	15	14	14	19	8319.5	4362.4	11016	6776.6	10	10	11	11	12	14	Carbamidomethylation; Deamidation (NQ)	54393	ERO1-like protein alpha OS=Homo sapiens OX=9606 GN=ERO1A PE=1 SV=2
556	541	P30050|RL12_HUMAN	P30050	RL12	HUMAN	149.6	56	34	25	24	56	5056.1	3312.7	4210.6	10151	7	7	7	4	6	12	Carbamidomethylation; Deamidation (NQ)	17819	60S ribosomal protein L12 OS=Homo sapiens OX=9606 GN=RPL12 PE=1 SV=1
441	430	P51159|RB27A_HUMAN	P51159	RB27A	HUMAN	149.58	36	36	28	29	29	12899	9282.6	8000.6	7069	8	7	13	8	13	12	Acetylation (Protein N-term)	24868	Ras-related protein Rab-27A OS=Homo sapiens OX=9606 GN=RAB27A PE=1 SV=3
454	460	O95498|VNN2_HUMAN	O95498	VNN2	HUMAN	149.44	19	16	19	19	10	18038	13618	10438	6061.1	7	7	10	15	9	10	Carbamidomethylation; Carbamylation; Deamidation (NQ)	58503	Vascular non-inflammatory molecule 2 OS=Homo sapiens OX=9606 GN=VNN2 PE=1 SV=3
268	498	P17931|LEG3_HUMAN	P17931	LEG3	HUMAN	149.39	30	27	25	26	25	47571	30848	28790	16504	8	8	28	26	18	23	Carbamidomethylation; Carbamylation; Deamidation (NQ); Acetylation (Protein N-term)	26152	Galectin-3 OS=Homo sapiens OX=9606 GN=LGALS3 PE=1 SV=5
666	380	P55160|NCKPL_HUMAN	P55160	NCKPL	HUMAN	149.13	9	6	6	1	1	5856.1	1703.2	799.65	0	9	8	11	6	1	2	Carbamidomethylation; Acetylation (Protein N-term)	128153	Nck-associated protein 1-like OS=Homo sapiens OX=9606 GN=NCKAP1L PE=1 SV=3
426	578	P19105|ML12A_HUMAN	P19105	ML12A	HUMAN	149.13	40	40	40	30	30	25407	17136	9764	13158	7	7	14	12	12	10	Carbamylation; Deamidation (NQ)	19794	Myosin regulatory light chain 12A OS=Homo sapiens OX=9606 GN=MYL12A PE=1 SV=2
426	579	O14950|ML12B_HUMAN	O14950	ML12B	HUMAN	149.13	40	40	40	30	30	25407	17136	9764	13158	7	7	14	12	12	10	Carbamylation; Deamidation (NQ)	19779	Myosin regulatory light chain 12B OS=Homo sapiens OX=9606 GN=MYL12B PE=1 SV=2
328	303	P05783|K1C18_HUMAN	P05783	K1C18	HUMAN	148.78	34	25	18	11	4	23881	11323	463.89		16	14	27	21	15	11	Carbamylation; Deamidation (NQ)	48058	Keratin type I cytoskeletal 18 OS=Homo sapiens OX=9606 GN=KRT18 PE=1 SV=2
506	490	P06753|TPM3_HUMAN	P06753	TPM3	HUMAN	148.4	25	25	18	20	17	10266	6636.9	5082.7	3873.6	9	9	12	10	6	7		32950	Tropomyosin alpha-3 chain OS=Homo sapiens OX=9606 GN=TPM3 PE=1 SV=2
499	431	P00747|PLMN_HUMAN	P00747	PLMN	HUMAN	148.29	20	14	8	9	9	8793.3	4653.5	7400.6	3485.5	13	13	14	6	9	7	Carbamidomethylation; Carbamylation; Deamidation (NQ); Oxidation (M)	90569	Plasminogen OS=Homo sapiens OX=9606 GN=PLG PE=1 SV=2
446	353	O95716|RAB3D_HUMAN	O95716	RAB3D	HUMAN	148.2	39	30	38	35	27	4172.2	7866.2	5650.2	4335.5	9	5	11	11	11	13	Carbamidomethylation; Carbamylation; Deamidation (NQ); Acetylation (Protein N-term)	24267	Ras-related protein Rab-3D OS=Homo sapiens OX=9606 GN=RAB3D PE=1 SV=1
681	348	Q13464|ROCK1_HUMAN	Q13464	ROCK1	HUMAN	148.05	9	4	6	1	2	2167.9	1322.2	1011.4	1182.2	11	11	6	8	1	4	Carbamidomethylation; Deamidation (NQ); Acetylation (Protein N-term)	158174	Rho-associated protein kinase 1 OS=Homo sapiens OX=9606 GN=ROCK1 PE=1 SV=1
404	518	P80188|NGAL_HUMAN	P80188	NGAL	HUMAN	147.81	45	44	37	32	39	21545	5289.5	6505.2	8139.4	8	8	17	14	9	12	Carbamidomethylation; Deamidation (NQ)	22588	Neutrophil gelatinase-associated lipocalin OS=Homo sapiens OX=9606 GN=LCN2 PE=1 SV=2
573	378	P29728|OAS2_HUMAN	P29728	OAS2	HUMAN	147.58	15	10	7	8	8	5113.2	2725.2	3289.6	3946.7	11	11	7	7	6	7	Carbamidomethylation	82431	2'-5'-oligoadenylate synthase 2 OS=Homo sapiens OX=9606 GN=OAS2 PE=1 SV=3
351	821	Q9NZH0|GPC5B_HUMAN	Q9NZH0	GPC5B	HUMAN	147.52	15	15	13	6	8	19391	14115	3759.2	5883.8	5	5	18	18	19	10	Deamidation (NQ); Oxidation (M)	44795	G-protein coupled receptor family C group 5 member B OS=Homo sapiens OX=9606 GN=GPRC5B PE=2 SV=2
648	442	Q13421|MSLN_HUMAN	Q13421	MSLN	HUMAN	146.34	14	10	10	6	2	3039.3	3149.7	1600.1	660.82	7	7	8	6	6	1	Carbamidomethylation	68986	Mesothelin OS=Homo sapiens OX=9606 GN=MSLN PE=1 SV=2
733	462	Q9NQ38|ISK5_HUMAN	Q9NQ38	ISK5	HUMAN	146.2	9	2	3	6	6	1483.9	2143.3	3510.6	3121.2	8	8	2	3	6	5	Carbamidomethylation	120715	Serine protease inhibitor Kazal-type 5 OS=Homo sapiens OX=9606 GN=SPINK5 PE=1 SV=2
515	290	Q14764|MVP_HUMAN	Q14764	MVP	HUMAN	146.12	17	14	6	4	8	9446.2	6140.7	1484.7	4276.5	15	15	14	6	4	10	Carbamidomethylation; Acetylation (Protein N-term)	99327	Major vault protein OS=Homo sapiens OX=9606 GN=MVP PE=1 SV=4
290	978	P28325|CYTD_HUMAN	P28325	CYTD	HUMAN	146.11	39	25	39	39	39	25792	16221	18294	17009	4	4	20	16	28	23	Carbamidomethylation; Carbamylation; Deamidation (NQ); Acetylation (Protein N-term)	16080	Cystatin-D OS=Homo sapiens OX=9606 GN=CST5 PE=1 SV=1
612	563	P02743|SAMP_HUMAN	P02743	SAMP	HUMAN	146.06	29	25	19	8	15	12915	11507	1849.4	1960.6	8	8	9	10	2	3		25387	Serum amyloid P-component OS=Homo sapiens OX=9606 GN=APCS PE=1 SV=2
582	644	O15162|PLS1_HUMAN	O15162	PLS1	HUMAN	146.03	22	19	19	15	16	8265	9157.3	6404.5	7111.7	7	7	9	5	6	7	Carbamidomethylation	35049	Phospholipid scramblase 1 OS=Homo sapiens OX=9606 GN=PLSCR1 PE=1 SV=1
478	315	Q14624|ITIH4_HUMAN	Q14624	ITIH4	HUMAN	145.93	10	7	4	10	7	10073	5751.2	7783.8	2710.3	9	9	10	9	11	9	Deamidation (NQ)	103357	Inter-alpha-trypsin inhibitor heavy chain H4 OS=Homo sapiens OX=9606 GN=ITIH4 PE=1 SV=4
405	575	A0A0A0MS15|HV349_HUMAN	A0A0A0MS15	HV349	HUMAN	145.23	46	39	43	46	46	8804.5	7432.7	1727.5	2657.2	6	3	12	16	15	8	Carbamidomethylation; Carbamylation; Deamidation (NQ)	13056	Immunoglobulin heavy variable 3-49 OS=Homo sapiens OX=9606 GN=IGHV3-49 PE=3 SV=1
780	419	P23381|SYWC_HUMAN	P23381	SYWC	HUMAN	145.21	24	21	12	0	0	4149.8	2087.9			9	9	9	5	0	0	Carbamidomethylation	53165	Tryptophan--tRNA ligase cytoplasmic OS=Homo sapiens OX=9606 GN=WARS1 PE=1 SV=2
352	305	Q14344|GNA13_HUMAN	Q14344	GNA13	HUMAN	144.75	29	21	21	16	18	5726.7	3998.7	2419.1	914.93	10	8	17	16	15	17	Carbamidomethylation; Carbamylation	44050	Guanine nucleotide-binding protein subunit alpha-13 OS=Homo sapiens OX=9606 GN=GNA13 PE=1 SV=2
645	383	P33176|KINH_HUMAN	P33176	KINH	HUMAN	144.37	13	6	6	6	10	1189.6	1243.2	0	858.74	9	6	5	4	5	7	Carbamidomethylation; Carbamylation; Deamidation (NQ)	109685	Kinesin-1 heavy chain OS=Homo sapiens OX=9606 GN=KIF5B PE=1 SV=1
346	762	P13688|CEAM1_HUMAN	P13688	CEAM1	HUMAN	144.24	12	12	12	12	12	6359.9	3261.8	3802.7	5091.5	4	3	15	20	16	16	Carbamidomethylation; Carbamylation; Acetylation (Protein N-term)	57560	Carcinoembryonic antigen-related cell adhesion molecule 1 OS=Homo sapiens OX=9606 GN=CEACAM1 PE=1 SV=2
509	311	P07339|CATD_HUMAN	P07339	CATD	HUMAN	144.21	38	31	17	21	23	8076.7	3682.6	3560.8	5194.9	11	11	10	7	6	12	Carbamidomethylation; Deamidation (NQ)	44552	Cathepsin D OS=Homo sapiens OX=9606 GN=CTSD PE=1 SV=1
494	355	P02790|HEMO_HUMAN	P02790	HEMO	HUMAN	143.95	28	21	16	6	14	6427	3751.2	2930.2	4351	9	9	11	13	5	8	Carbamidomethylation; Deamidation (NQ)	51676	Hemopexin OS=Homo sapiens OX=9606 GN=HPX PE=1 SV=2
363	864	P31151|S10A7_HUMAN	P31151	S10A7	HUMAN	143.95	49	25	11	49	36	4203.7	0	8323.9	9354.9	6	6	10	1	26	25	Carbamidomethylation; Deamidation (NQ)	11471	Protein S100-A7 OS=Homo sapiens OX=9606 GN=S100A7 PE=1 SV=4
470	693	Q9H4G4|GAPR1_HUMAN	Q9H4G4	GAPR1	HUMAN	143.79	47	47	33	47	47	19713	21829	12580	14820	5	5	15	10	6	10	Carbamidomethylation; Deamidation (NQ)	17218	Golgi-associated plant pathogenesis-related protein 1 OS=Homo sapiens OX=9606 GN=GLIPR2 PE=1 SV=3
665	492	Q9Y6E0|STK24_HUMAN	Q9Y6E0	STK24	HUMAN	143.77	18	9	10	9	15	1293.4	733.78	1105.6	1500.5	7	5	4	5	4	7	Carbamidomethylation; Carbamylation; Deamidation (NQ)	49308	Serine/threonine-protein kinase 24 OS=Homo sapiens OX=9606 GN=STK24 PE=1 SV=1
551	409	P26641|EF1G_HUMAN	P26641	EF1G	HUMAN	143.71	20	16	11	13	14	4256.8	5330.4	3620.1	1204.9	9	9	10	8	7	5	Deamidation (NQ); Acetylation (Protein N-term)	50119	Elongation factor 1-gamma OS=Homo sapiens OX=9606 GN=EEF1G PE=1 SV=3
761	696	O95497|VNN1_HUMAN	O95497	VNN1	HUMAN	143.71	8	8	7	3	3	3187	3415.7	576.3	456.23	4	4	6	6	2	1	Carbamidomethylation	57012	Pantetheinase OS=Homo sapiens OX=9606 GN=VNN1 PE=1 SV=2
592	324	Q02809|PLOD1_HUMAN	Q02809	PLOD1	HUMAN	143.67	16	12	7	8	5	6630.4	3212.7	4166.3	686.66	11	11	9	5	8	3	Carbamidomethylation	83550	Procollagen-lysine 2-oxoglutarate 5-dioxygenase 1 OS=Homo sapiens OX=9606 GN=PLOD1 PE=1 SV=2
590	530	Q14315|FLNC_HUMAN	Q14315	FLNC	HUMAN	143.66	5	3	2	2	2	352.83		318.38	3110.6	12	5	9	6	6	4	Carbamidomethylation; Carbamylation; Deamidation (NQ); Acetylation (Protein N-term)	291020	Filamin-C OS=Homo sapiens OX=9606 GN=FLNC PE=1 SV=3
652	413	Q14847|LASP1_HUMAN	Q14847	LASP1	HUMAN	143.52	40	19	28	10	20	4414.4	4316.3	1037.5	3339.6	10	10	7	6	3	5	Carbamidomethylation	29717	LIM and SH3 domain protein 1 OS=Homo sapiens OX=9606 GN=LASP1 PE=1 SV=2
398	667	P15328|FOLR1_HUMAN	P15328	FOLR1	HUMAN	143	25	25	25	19	25	8839.2	7194.2	4552.8	5983.5	7	7	14	16	13	10	Carbamidomethylation; Deamidation (NQ)	29819	Folate receptor alpha OS=Homo sapiens OX=9606 GN=FOLR1 PE=1 SV=3
392	826	P22528|SPR1B_HUMAN	P22528	SPR1B	HUMAN	142.88	53	44	44	53	53	2397.7	1899.6	2920.6	2589.8	4	1	4	11	15	24	Carbamidomethylation; Carbamylation; Deamidation (NQ)	9888	Cornifin-B OS=Homo sapiens OX=9606 GN=SPRR1B PE=1 SV=2
419	558	P0DP24|CALM2_HUMAN	P0DP24	CALM2	HUMAN	142.8	59	44	36	36	50	7540.8	6104.8	3833.5	4658.3	6	5	15	7	10	17	Deamidation (NQ); Acetylation (Protein N-term)	16838	Calmodulin-2 OS=Homo sapiens OX=9606 GN=CALM2 PE=1 SV=1
419	559	P0DP23|CALM1_HUMAN	P0DP23	CALM1	HUMAN	142.8	59	44	36	36	50	7540.8	6104.8	3833.5	4658.3	6	5	15	7	10	17	Deamidation (NQ); Acetylation (Protein N-term)	16838	Calmodulin-1 OS=Homo sapiens OX=9606 GN=CALM1 PE=1 SV=1
419	560	P0DP25|CALM3_HUMAN	P0DP25	CALM3	HUMAN	142.8	59	44	36	36	50	7540.8	6104.8	3833.5	4658.3	6	5	15	7	10	17	Deamidation (NQ); Acetylation (Protein N-term)	16838	Calmodulin-3 OS=Homo sapiens OX=9606 GN=CALM3 PE=1 SV=1
527	482	O15145|ARPC3_HUMAN	O15145	ARPC3	HUMAN	142.4	40	40	24	25	31	12896	10757	4390.5	6729.4	7	7	11	9	6	7	Carbamidomethylation; Carbamylation; Oxidation (M)	20547	Actin-related protein 2/3 complex subunit 3 OS=Homo sapiens OX=9606 GN=ARPC3 PE=1 SV=3
540	312	Q8N271|PROM2_HUMAN	Q8N271	PROM2	HUMAN	141.73	16	10	7	11	6	3314.5	5099.9	2477.8	3368.1	10	10	9	8	9	6	Carbamidomethylation	91883	Prominin-2 OS=Homo sapiens OX=9606 GN=PROM2 PE=1 SV=1
689	426	Q04446|GLGB_HUMAN	Q04446	GLGB	HUMAN	141.48	13	10	5	5	1	9005.5	2865	1353.4	485.42	8	8	10	5	3	1	Carbamidomethylation	80474	1 4-alpha-glucan-branching enzyme OS=Homo sapiens OX=9606 GN=GBE1 PE=1 SV=3
140	828	P01768|HV330_HUMAN	P01768	HV330	HUMAN	141.35	34	34	34	28	28	32682	29967	25142	36592	5	1	63	74	48	32	Carbamidomethylation; Carbamylation; Deamidation (NQ); Oxidation (M); Acetylation (Protein N-term)	12947	Immunoglobulin heavy variable 3-30 OS=Homo sapiens OX=9606 GN=IGHV3-30 PE=1 SV=2
140	829	P0DP03|HVC05_HUMAN	P0DP03	HVC05	HUMAN	141.35	34	34	34	28	28	32682	29967	25142	36592	5	1	63	74	48	32	Carbamidomethylation; Carbamylation; Deamidation (NQ); Oxidation (M); Acetylation (Protein N-term)	12947	Immunoglobulin heavy variable 3-30-5 OS=Homo sapiens OX=9606 GN=IGHV3-30-5 PE=3 SV=1
576	337	Q16851|UGPA_HUMAN	Q16851	UGPA	HUMAN	141.11	24	17	14	8	14	7764.1	4939.3	3327	3854.7	12	12	8	8	4	7	Carbamidomethylation; Deamidation (NQ)	56940	UTP--glucose-1-phosphate uridylyltransferase OS=Homo sapiens OX=9606 GN=UGP2 PE=1 SV=5
553	314	Q92608|DOCK2_HUMAN	Q92608	DOCK2	HUMAN	140.99	8	5	2	4	4	3671.1	2148.2	25193	26215	11	11	9	4	9	7	Carbamidomethylation; Deamidation (NQ); Oxidation (M)	211947	Dedicator of cytokinesis protein 2 OS=Homo sapiens OX=9606 GN=DOCK2 PE=1 SV=2
340	557	Q9NSB2|KRT84_HUMAN	Q9NSB2	KRT84	HUMAN	140.97	14	8	6	8	8	1184.9		0	1193.5	9	3	12	12	25	19	Carbamidomethylation; Carbamylation	64842	Keratin type II cuticular Hb4 OS=Homo sapiens OX=9606 GN=KRT84 PE=2 SV=2
549	486	Q9HDC9|APMAP_HUMAN	Q9HDC9	APMAP	HUMAN	140.97	19	15	15	12	12	4508.9	8001.7	9776.4	8010.6	8	8	8	7	8	7	Carbamidomethylation; Carbamylation	46480	Adipocyte plasma membrane-associated protein OS=Homo sapiens OX=9606 GN=APMAP PE=1 SV=2
546	370	O95336|6PGL_HUMAN	O95336	6PGL	HUMAN	140.75	52	28	34	19	33	4055.8	1540.7	1452.6	2449.8	9	9	5	9	10	7	Carbamidomethylation	27547	6-phosphogluconolactonase OS=Homo sapiens OX=9606 GN=PGLS PE=1 SV=2
501	332	P40394|ADH7_HUMAN	P40394	ADH7	HUMAN	140.48	26	18	20	16	14	8622.6	5111.6	8571.7	3955.9	10	10	12	8	9	7	Carbamidomethylation	41481	All-trans-retinol dehydrogenase [NAD(+)] ADH7 OS=Homo sapiens OX=9606 GN=ADH7 PE=1 SV=2
368	1029	A2NJV5|KV229_HUMAN	A2NJV5	KV229	HUMAN	140.29	26	26	26	17	26	14969	14209		4477.8	4	2	18	19	8	16	Carbamylation; Acetylation (Protein N-term)	13085	Immunoglobulin kappa variable 2-29 OS=Homo sapiens OX=9606 GN=IGKV2-29 PE=3 SV=2
368	1050	A0A075B6S2|KVD29_HUMAN	A0A075B6S2	KVD29	HUMAN	140.29	26	26	26	17	26	14969	14209		4477.8	4	2	18	19	8	16	Carbamylation; Acetylation (Protein N-term)	13143	Immunoglobulin kappa variable 2D-29 OS=Homo sapiens OX=9606 GN=IGKV2D-29 PE=3 SV=1
415	601	P62906|RL10A_HUMAN	P62906	RL10A	HUMAN	140.27	36	18	21	35	35	7683.6	7119.5	19447	14410	9	9	5	7	23	14	Carbamidomethylation; Oxidation (M)	24831	60S ribosomal protein L10a OS=Homo sapiens OX=9606 GN=RPL10A PE=1 SV=2
234	502	Q5TEC6|H3PS2_HUMAN	Q5TEC6	H3PS2	HUMAN	140.26	62	38	34	55	25	22139	7560.2	10659	8546.6	9	2	27	28	33	22	Carbamidomethylation; Carbamylation; Deamidation (NQ); Oxidation (M); Acetylation (Protein N-term)	15430	Histone HIST2H3PS2 OS=Homo sapiens OX=9606 GN=H3-2 PE=1 SV=1
711	722	Q9BXJ4|C1QT3_HUMAN	Q9BXJ4	C1QT3	HUMAN	139.95	21	8	16	7	18	7966	2300.4	1131.3	3650.8	6	6	3	7	2	6	Carbamidomethylation; Deamidation (NQ)	26994	Complement C1q tumor necrosis factor-related protein 3 OS=Homo sapiens OX=9606 GN=C1QTNF3 PE=1 SV=1
460	512	P04439|HLAA_HUMAN	P04439	HLAA	HUMAN	139.95	22	18	17	18	18	1242.5	1672.4	857.98	558.99	7	4	10	9	12	12	Deamidation (NQ)	40841	HLA class I histocompatibility antigen A alpha chain OS=Homo sapiens OX=9606 GN=HLA-A PE=1 SV=2
471	546	P27482|CALL3_HUMAN	P27482	CALL3	HUMAN	139.61	51	51	42	42	44	10516	1026.1	6543.9	5299.2	6	5	12	7	11	11	Deamidation (NQ); Acetylation (Protein N-term)	16891	Calmodulin-like protein 3 OS=Homo sapiens OX=9606 GN=CALML3 PE=1 SV=2
496	517	O43240|KLK10_HUMAN	O43240	KLK10	HUMAN	139.35	35	11	5	29	35	1026.9	679.89	5468.2	7939.5	7	7	3	1	15	18	Carbamidomethylation; Carbamylation; Deamidation (NQ)	30170	Kallikrein-10 OS=Homo sapiens OX=9606 GN=KLK10 PE=1 SV=3
732	896	O75348|VATG1_HUMAN	O75348	VATG1	HUMAN	139.21	42	35	35	41	34	966.7	2765.8	1569.2	940.7	5	5	4	3	6	4	Carbamidomethylation; Carbamylation; Acetylation (Protein N-term)	13758	V-type proton ATPase subunit G 1 OS=Homo sapiens OX=9606 GN=ATP6V1G1 PE=1 SV=3
518	547	P10321|HLAC_HUMAN	P10321	HLAC	HUMAN	139.07	23	23	16	16	20	964.25	1299.8	897.32	1095.5	6	2	9	7	7	11	Carbamidomethylation; Deamidation (NQ)	40649	HLA class I histocompatibility antigen C alpha chain OS=Homo sapiens OX=9606 GN=HLA-C PE=1 SV=3
586	569	Q9NP72|RAB18_HUMAN	Q9NP72	RAB18	HUMAN	139.02	35	28	30	23	30	4577.2	1985.5	1941	1592.3	6	6	7	8	6	5	Carbamidomethylation; Acetylation (Protein N-term)	22977	Ras-related protein Rab-18 OS=Homo sapiens OX=9606 GN=RAB18 PE=1 SV=1
396	433	P04004|VTNC_HUMAN	P04004	VTNC	HUMAN	138.98	18	13	14	18	14	11449	11998	12918	8033.7	7	7	11	10	17	15	Carbamidomethylation; Deamidation (NQ)	54306	Vitronectin OS=Homo sapiens OX=9606 GN=VTN PE=1 SV=1
436	777	Q15517|CDSN_HUMAN	Q15517	CDSN	HUMAN	138.93	13	11	10	13	11	4160.1	4532.8	16525	12922	5	5	6	8	16	17	Carbamidomethylation	51522	Corneodesmosin OS=Homo sapiens OX=9606 GN=CDSN PE=1 SV=3
477	604	P18510|IL1RA_HUMAN	P18510	IL1RA	HUMAN	138.79	63	27	19	63	34	13377	9693	20754	10321	7	7	5	5	15	15	Carbamidomethylation; Oxidation (M)	20055	Interleukin-1 receptor antagonist protein OS=Homo sapiens OX=9606 GN=IL1RN PE=1 SV=1
531	833	Q96RM1|SPR2F_HUMAN	Q96RM1	SPR2F	HUMAN	138.67	60	42	42	60	60			532.92	0	4	1	7	6	11	8	Carbamidomethylation; Acetylation (Protein N-term)	7805	Small proline-rich protein 2F OS=Homo sapiens OX=9606 GN=SPRR2F PE=3 SV=1
734	386	Q10567|AP1B1_HUMAN	Q10567	AP1B1	HUMAN	138.45	12	11	3	2	3	3698.6	1278	1167.2	1163.1	9	4	8	2	3	3	Carbamidomethylation; Carbamylation	104637	AP-1 complex subunit beta-1 OS=Homo sapiens OX=9606 GN=AP1B1 PE=1 SV=2
406	692	P15531|NDKA_HUMAN	P15531	NDKA	HUMAN	138.42	40	40	24	30	30	889.64				6	1	17	16	8	10	Carbamidomethylation; Deamidation (NQ); Oxidation (M)	17149	Nucleoside diphosphate kinase A OS=Homo sapiens OX=9606 GN=NME1 PE=1 SV=1
646	456	P42224|STAT1_HUMAN	P42224	STAT1	HUMAN	138.24	11	10	5	5	8	2751.5	1135.5	1801.2	1601.1	7	7	9	3	4	5	Deamidation (NQ)	87335	Signal transducer and activator of transcription 1-alpha/beta OS=Homo sapiens OX=9606 GN=STAT1 PE=1 SV=2
626	346	Q2M2H8|MGAL_HUMAN	Q2M2H8	MGAL	HUMAN	138.05	4	2	3	2	0	2667.4	2659.2	5430.9		8	7	5	8	8	1	Carbamidomethylation; Deamidation (NQ)	277989	Probable maltase-glucoamylase 2 OS=Homo sapiens OX=9606 GN=MGAM2 PE=2 SV=3
434	528	P16070|CD44_HUMAN	P16070	CD44	HUMAN	138.05	9	9	8	6	6	15716	7093.4	7648.6	6628.9	6	6	14	13	9	11	Carbamidomethylation; Deamidation (NQ); Oxidation (M)	81538	CD44 antigen OS=Homo sapiens OX=9606 GN=CD44 PE=1 SV=3
544	542	Q8N474|SFRP1_HUMAN	Q8N474	SFRP1	HUMAN	137.98	28	13	12	14	23	7124.3	3266	8314	5563.4	8	8	8	6	8	9	Carbamidomethylation	35386	Secreted frizzled-related protein 1 OS=Homo sapiens OX=9606 GN=SFRP1 PE=1 SV=1
485	656	P11233|RALA_HUMAN	P11233	RALA	HUMAN	137.85	30	23	27	22	30	3883.7	1752.9	4541.2	1163.5	6	3	8	10	6	15	Deamidation (NQ)	23567	Ras-related protein Ral-A OS=Homo sapiens OX=9606 GN=RALA PE=1 SV=1
516	379	P37802|TAGL2_HUMAN	P37802	TAGL2	HUMAN	137.84	52	39	18	47	50	8327.3	3875.4	6444.3	6051.6	9	9	11	4	9	10	Carbamylation; Deamidation (NQ); Acetylation (Protein N-term)	22391	Transgelin-2 OS=Homo sapiens OX=9606 GN=TAGLN2 PE=1 SV=3
566	474	Q9UKR3|KLK13_HUMAN	Q9UKR3	KLK13	HUMAN	137.73	32	21	22	24	13	7988.8	7430.6	5709.6	5738.6	7	7	7	8	9	4	Carbamidomethylation; Oxidation (M)	30570	Kallikrein-13 OS=Homo sapiens OX=9606 GN=KLK13 PE=2 SV=1
520	428	Q9UJ70|NAGK_HUMAN	Q9UJ70	NAGK	HUMAN	137.67	22	22	22	16	18	12477	9724.5	5122	9553.2	8	8	9	10	8	7	Acetylation (Protein N-term)	37376	N-acetyl-D-glucosamine kinase OS=Homo sapiens OX=9606 GN=NAGK PE=1 SV=4
417	665	P02747|C1QC_HUMAN	P02747	C1QC	HUMAN	137.65	25	25	25	25	25	26601	18607	20095	18007	5	5	13	12	12	12	Carbamidomethylation	25774	Complement C1q subcomponent subunit C OS=Homo sapiens OX=9606 GN=C1QC PE=1 SV=3
723	643	P04632|CPNS1_HUMAN	P04632	CPNS1	HUMAN	137.52	25	17	6	11	17	6196.4	3082.9	0	4879.1	5	4	6	2	4	5	Carbamidomethylation	28316	Calpain small subunit 1 OS=Homo sapiens OX=9606 GN=CAPNS1 PE=1 SV=1
735	352	Q8TD55|PKHO2_HUMAN	Q8TD55	PKHO2	HUMAN	137.46	20	16	2	6	11	6385.2	1834.7	3350.3	2548.3	8	8	7	1	3	5	Carbamidomethylation; Acetylation (Protein N-term)	53350	Pleckstrin homology domain-containing family O member 2 OS=Homo sapiens OX=9606 GN=PLEKHO2 PE=1 SV=1
736	434	Q7Z404|TMC4_HUMAN	Q7Z404	TMC4	HUMAN	137.39	14	8	10	4	0	4419.7	5049.1	0		10	10	5	9	2	0	Carbamidomethylation; Carbamylation; Acetylation (Protein N-term)	79208	Transmembrane channel-like protein 4 OS=Homo sapiens OX=9606 GN=TMC4 PE=1 SV=3
517	551	P61019|RAB2A_HUMAN	P61019	RAB2A	HUMAN	137.33	35	30	30	35	25	14067	4839.5	8126.2	1423.1	6	6	10	7	10	7	Deamidation (NQ)	23546	Ras-related protein Rab-2A OS=Homo sapiens OX=9606 GN=RAB2A PE=1 SV=1
584	341	P17987|TCPA_HUMAN	P17987	TCPA	HUMAN	137.07	18	9	13	14	6	2024.1	2845.2	2788.2	704.53	8	8	7	9	7	3	Carbamidomethylation	60344	T-complex protein 1 subunit alpha OS=Homo sapiens OX=9606 GN=TCP1 PE=1 SV=1
360	414	Q9NUQ9|CYRIB_HUMAN	Q9NUQ9	CYRIB	HUMAN	136.97	33	23	22	23	28	10983	21008	42703	14347	9	9	13	17	16	17	Carbamidomethylation	36748	CYFIP-related Rac1 interactor B OS=Homo sapiens OX=9606 GN=CYRIB PE=1 SV=1
605	326	O95466|FMNL1_HUMAN	O95466	FMNL1	HUMAN	136.86	11	4	7	5	5	3080.6	5581.3	4127.2	4017.6	11	11	4	7	7	6	Carbamylation; Oxidation (M)	121853	Formin-like protein 1 OS=Homo sapiens OX=9606 GN=FMNL1 PE=1 SV=3
530	728	P05090|APOD_HUMAN	P05090	APOD	HUMAN	136.8	28	16	23	28	28	1655.2	4447.9	3228.4	6934.1	7	7	5	7	9	11	Carbamidomethylation; Deamidation (NQ); Oxidation (M)	21276	Apolipoprotein D OS=Homo sapiens OX=9606 GN=APOD PE=1 SV=1
536	423	P08473|NEP_HUMAN	P08473	NEP	HUMAN	136.77	13	8	9	7	8	5728.8	4484.2	852.39	1268.8	9	9	10	7	6	8	Carbamidomethylation; Deamidation (NQ); Oxidation (M)	85514	Neprilysin OS=Homo sapiens OX=9606 GN=MME PE=1 SV=2
579	505	P00918|CAH2_HUMAN	P00918	CAH2	HUMAN	136.73	33	33	19	18	17	7468.6	4809.6	3591.1	2701.1	7	7	9	7	5	6		29246	Carbonic anhydrase 2 OS=Homo sapiens OX=9606 GN=CA2 PE=1 SV=2
574	470	Q15942|ZYX_HUMAN	Q15942	ZYX	HUMAN	136.63	16	14	6	9	5	23712	22006	1995.1	8755.1	7	7	9	7	5	6	Carbamidomethylation	61277	Zyxin OS=Homo sapiens OX=9606 GN=ZYX PE=1 SV=1
618	421	O75390|CISY_HUMAN	O75390	CISY	HUMAN	136.51	20	15	15	8	6	4424.3	4250.2	4102.8	0	9	9	8	7	5	3	Carbamidomethylation	51712	Citrate synthase mitochondrial OS=Homo sapiens OX=9606 GN=CS PE=1 SV=2
330	1961	P01615|KVD28_HUMAN	P01615	KVD28	HUMAN	136.18	17	17	17	17	17	19517	3814.7	3353.2	4203.9	3	2	22	24	12	15	Carbamylation; Acetylation (Protein N-term)	12957	Immunoglobulin kappa variable 2D-28 OS=Homo sapiens OX=9606 GN=IGKV2D-28 PE=1 SV=2
330	1962	A0A075B6P5|KV228_HUMAN	A0A075B6P5	KV228	HUMAN	136.18	17	17	17	17	17	19517	3814.7	3353.2	4203.9	3	2	22	24	12	15	Carbamylation; Acetylation (Protein N-term)	12957	Immunoglobulin kappa variable 2-28 OS=Homo sapiens OX=9606 GN=IGKV2-28 PE=3 SV=1
330	1963	P01614|KVD40_HUMAN	P01614	KVD40	HUMAN	136.18	17	17	17	17	17	19517	3814.7	3353.2	4203.9	3	2	22	24	12	15	Carbamylation; Acetylation (Protein N-term)	13310	Immunoglobulin kappa variable 2D-40 OS=Homo sapiens OX=9606 GN=IGKV2D-40 PE=1 SV=2
330	1964	A0A087WW87|KV240_HUMAN	A0A087WW87	KV240	HUMAN	136.18	17	17	17	17	17	19517	3814.7	3353.2	4203.9	3	2	22	24	12	15	Carbamylation; Acetylation (Protein N-term)	13310	Immunoglobulin kappa variable 2-40 OS=Homo sapiens OX=9606 GN=IGKV2-40 PE=3 SV=2
525	342	O75695|XRP2_HUMAN	O75695	XRP2	HUMAN	136.06	31	18	17	15	21	8068.2	9057.9	5424.7	8712.6	11	11	7	11	6	9	Carbamidomethylation	39641	Protein XRP2 OS=Homo sapiens OX=9606 GN=RP2 PE=1 SV=4
512	473	Q6P4A8|PLBL1_HUMAN	Q6P4A8	PLBL1	HUMAN	135.86	15	12	12	11	11	3987	4961.2	3681.4	3016	7	7	8	11	9	7	Carbamidomethylation; Deamidation (NQ)	63255	Phospholipase B-like 1 OS=Homo sapiens OX=9606 GN=PLBD1 PE=1 SV=2
647	463	Q01432|AMPD3_HUMAN	Q01432	AMPD3	HUMAN	135.47	9	7	9	3	3	5050.9	4470.1	1442	1462.3	7	7	6	9	4	2	Carbamidomethylation	88812	AMP deaminase 3 OS=Homo sapiens OX=9606 GN=AMPD3 PE=1 SV=1
615	374	Q9H6S3|ES8L2_HUMAN	Q9H6S3	ES8L2	HUMAN	135.32	15	9	10	3	4	2237.4	6165.4	987.87	0	10	10	8	8	3	4	Carbamidomethylation	80621	Epidermal growth factor receptor kinase substrate 8-like protein 2 OS=Homo sapiens OX=9606 GN=EPS8L2 PE=1 SV=2
684	416	Q13835|PKP1_HUMAN	Q13835	PKP1	HUMAN	135.31	13	7	7	11	8	3786.5	1836.6	3511.5	1142.1	8	8	4	4	6	5	Carbamidomethylation	82861	Plakophilin-1 OS=Homo sapiens OX=9606 GN=PKP1 PE=1 SV=2
682	879	P02462|CO4A1_HUMAN	P02462	CO4A1	HUMAN	135.27	2	2	2	0	0	7056.1	11083			4	4	8	11	0	0	Carbamidomethylation	160611	Collagen alpha-1(IV) chain OS=Homo sapiens OX=9606 GN=COL4A1 PE=1 SV=4
635	817	Q15722|LT4R1_HUMAN	Q15722	LT4R1	HUMAN	135.23	16	14	16	13	12	5709.8	5600.4	1909	3071.5	5	5	6	9	4	3		37557	Leukotriene B4 receptor 1 OS=Homo sapiens OX=9606 GN=LTB4R PE=1 SV=2
555	339	P30101|PDIA3_HUMAN	P30101	PDIA3	HUMAN	135.14	25	14	13	18	9	4979.6	3375.7	6810.1	2069	11	11	9	7	8	5	Carbamidomethylation; Carbamylation; Deamidation (NQ)	56782	Protein disulfide-isomerase A3 OS=Homo sapiens OX=9606 GN=PDIA3 PE=1 SV=4
562	338	P26639|SYTC_HUMAN	P26639	SYTC	HUMAN	134.79	13	7	9	7	9	3745.8	4027.8	1659.2	3060.8	10	10	6	7	5	10	Carbamidomethylation	83435	Threonine--tRNA ligase 1 cytoplasmic OS=Homo sapiens OX=9606 GN=TARS1 PE=1 SV=3
374	444	P59998|ARPC4_HUMAN	P59998	ARPC4	HUMAN	134.67	40	35	35	29	33	38357	12193	16454	16593	7	7	18	16	11	14	Carbamylation; Deamidation (NQ); Acetylation (Protein N-term)	19667	Actin-related protein 2/3 complex subunit 4 OS=Homo sapiens OX=9606 GN=ARPC4 PE=1 SV=3
539	631	P01889|HLAB_HUMAN	P01889	HLAB	HUMAN	134.36	19	15	9	13	17	6545.3	6602.3	6851.6	7606.8	5	2	7	6	7	11		40460	HLA class I histocompatibility antigen B alpha chain OS=Homo sapiens OX=9606 GN=HLA-B PE=1 SV=3
543	576	P84085|ARF5_HUMAN	P84085	ARF5	HUMAN	134.18	53	26	26	32	36	3665.5	4457.3	5516.9	3882.5	7	3	7	8	8	8		20530	ADP-ribosylation factor 5 OS=Homo sapiens OX=9606 GN=ARF5 PE=1 SV=2
630	608	Q99497|PARK7_HUMAN	Q99497	PARK7	HUMAN	134.15	50	46	29	8	12	6816.5	3762.4	931.84	2174.2	7	7	11	5	2	4	Carbamidomethylation; Deamidation (NQ)	19891	Parkinson disease protein 7 OS=Homo sapiens OX=9606 GN=PARK7 PE=1 SV=2
427	705	P13498|CY24A_HUMAN	P13498	CY24A	HUMAN	134.11	38	38	38	35	16	8935.2	17768	22837	5840.8	5	5	14	11	13	10	Carbamylation	21013	Cytochrome b-245 light chain OS=Homo sapiens OX=9606 GN=CYBA PE=1 SV=3
673	581	P0DML2|CSH1_HUMAN	P0DML2	CSH1	HUMAN	133.57	30	30	24	0	0	12775	7422.9			6	6	13	7	0	0	Carbamylation; Oxidation (M)	25020	Chorionic somatomammotropin hormone 1 OS=Homo sapiens OX=9606 GN=CSH1 PE=1 SV=1
673	582	P0DML3|CSH2_HUMAN	P0DML3	CSH2	HUMAN	133.57	30	30	24	0	0	12775	7422.9			6	6	13	7	0	0	Carbamylation; Oxidation (M)	24994	Chorionic somatomammotropin hormone 2 OS=Homo sapiens OX=9606 GN=CSH2 PE=1 SV=1
465	836	P12724|ECP_HUMAN	P12724	ECP	HUMAN	132.75	33	33	31	33	23	12385	11895	17703	9909.4	6	6	13	8	11	10	Carbamidomethylation	18385	Eosinophil cationic protein OS=Homo sapiens OX=9606 GN=RNASE3 PE=1 SV=2
412	732	P06703|S10A6_HUMAN	P06703	S10A6	HUMAN	132.53	54	54	46	46	46	55916	48812	45360	38916	6	6	15	12	12	11	Carbamidomethylation; Oxidation (M); Acetylation (Protein N-term)	10180	Protein S100-A6 OS=Homo sapiens OX=9606 GN=S100A6 PE=1 SV=1
248	731	P24158|PRTN3_HUMAN	P24158	PRTN3	HUMAN	132.41	31	27	18	11	11	41408	34452	23432	26981	5	5	24	27	32	19	Carbamidomethylation; Carbamylation; Deamidation (NQ)	27807	Myeloblastin OS=Homo sapiens OX=9606 GN=PRTN3 PE=1 SV=3
621	603	Q5T749|KPRP_HUMAN	Q5T749	KPRP	HUMAN	132.35	13	4	2	13	9	0	0	8967.1	13791	6	6	2	1	11	9	Carbamidomethylation; Carbamylation	64136	Keratinocyte proline-rich protein OS=Homo sapiens OX=9606 GN=KPRP PE=1 SV=1
489	889	Q9NZT1|CALL5_HUMAN	Q9NZT1	CALL5	HUMAN	132.34	39	31	31	38	32	6445.7	2721.9	12150	8494.9	6	6	10	5	11	12	Carbamylation; Deamidation (NQ); Acetylation (Protein N-term)	15893	Calmodulin-like protein 5 OS=Homo sapiens OX=9606 GN=CALML5 PE=1 SV=2
659	533	Q6XQN6|PNCB_HUMAN	Q6XQN6	PNCB	HUMAN	132.24	17	12	7	0	3	3093.9	3957		1170.9	9	9	10	9	0	2	Carbamidomethylation; Deamidation (NQ); Acetylation (Protein N-term)	57578	Nicotinate phosphoribosyltransferase OS=Homo sapiens OX=9606 GN=NAPRT PE=1 SV=2
606	344	Q9UQB8|BAIP2_HUMAN	Q9UQB8	BAIP2	HUMAN	132.04	17	16	10	6	7	7172.2	6398.4	1517.6	1369.4	10	10	9	7	4	4	Carbamidomethylation	60868	Brain-specific angiogenesis inhibitor 1-associated protein 2 OS=Homo sapiens OX=9606 GN=BAIAP2 PE=1 SV=1
568	945	P61769|B2MG_HUMAN	P61769	B2MG	HUMAN	131.7	38	19	19	35	35	9531.7	6729.2	6717.6	3579.4	4	4	10	5	7	6	Carbamidomethylation; Carbamylation	13715	Beta-2-microglobulin OS=Homo sapiens OX=9606 GN=B2M PE=1 SV=1
599	403	P63244|RACK1_HUMAN	P63244	RACK1	HUMAN	131.57	29	18	21	9	9	4704.2	3676.6	1747.4	3171.8	9	9	10	8	3	4	Carbamidomethylation; Deamidation (NQ)	35077	Receptor of activated protein C kinase 1 OS=Homo sapiens OX=9606 GN=RACK1 PE=1 SV=3
864	544	P22234|PUR6_HUMAN	P22234	PUR6	HUMAN	131.53	19	11	6	6	5	1639.3	372.83	1325.5	1510.9	7	7	4	3	2	2	Carbamidomethylation; Acetylation (Protein N-term)	47079	Multifunctional protein ADE2 OS=Homo sapiens OX=9606 GN=PAICS PE=1 SV=3
559	961	P63218|GBG5_HUMAN	P63218	GBG5	HUMAN	131.47	51	43	43	43	51	26778	23636	28032	28157	6	6	6	7	7	9	Acetylation (Protein N-term)	7318	Guanine nucleotide-binding protein G(I)/G(S)/G(O) subunit gamma-5 OS=Homo sapiens OX=9606 GN=GNG5 PE=1 SV=3
1081	1080	P08123|CO1A2_HUMAN	P08123	CO1A2	HUMAN	131.36	3	2	2	1	0	1266.8	5661.6	682.11		4	4	2	3	1	0	Acetylation (Protein N-term)	129314	Collagen alpha-2(I) chain OS=Homo sapiens OX=9606 GN=COL1A2 PE=1 SV=7
500	571	P07305|H10_HUMAN	P07305	H10	HUMAN	131.17	32	15	22	22	32	7319.4	7457.6	22228	16855	6	6	4	5	13	14	Carbamylation; Deamidation (NQ); Acetylation (Protein N-term)	20863	Histone H1.0 OS=Homo sapiens OX=9606 GN=H1-0 PE=1 SV=3
409	539	P02746|C1QB_HUMAN	P02746	C1QB	HUMAN	130.89	30	26	21	25	18	12612	6410.1	14162	8802.5	8	8	13	12	15	10	Carbamidomethylation; Deamidation (NQ); Oxidation (M)	26722	Complement C1q subcomponent subunit B OS=Homo sapiens OX=9606 GN=C1QB PE=1 SV=3
538	417	Q15907|RB11B_HUMAN	Q15907	RB11B	HUMAN	130.76	47	24	16	33	33	11413	4166.8	16248	8754.7	9	8	7	3	11	10	Acetylation (Protein N-term)	24488	Ras-related protein Rab-11B OS=Homo sapiens OX=9606 GN=RAB11B PE=1 SV=4
466	566	P06731|CEAM5_HUMAN	P06731	CEAM5	HUMAN	130.73	12	10	7	9	8	2454.1	4581.5	5153.4	6845.6	6	5	9	8	10	15	Carbamidomethylation; Carbamylation; Deamidation (NQ); Acetylation (Protein N-term)	76795	Carcinoembryonic antigen-related cell adhesion molecule 5 OS=Homo sapiens OX=9606 GN=CEACAM5 PE=1 SV=3
640	436	Q70J99|UN13D_HUMAN	Q70J99	UN13D	HUMAN	130.45	9	5	7	5	4	2868.3	2510.2	3547.2	1583.9	7	7	6	7	5	4		123282	Protein unc-13 homolog D OS=Homo sapiens OX=9606 GN=UNC13D PE=1 SV=1
765	753	Q92882|OSTF1_HUMAN	Q92882	OSTF1	HUMAN	130.36	22	9	7	19	13	2195.8	605.62	2593.4	3475.1	5	5	3	2	4	6	Deamidation (NQ)	23787	Osteoclast-stimulating factor 1 OS=Homo sapiens OX=9606 GN=OSTF1 PE=1 SV=2
402	707	Q14651|PLSI_HUMAN	Q14651	PLSI	HUMAN	130.14	10	8	6	4	6	592.71				6	1	18	14	8	12	Carbamidomethylation; Carbamylation; Deamidation (NQ); Acetylation (Protein N-term)	70254	Plastin-1 OS=Homo sapiens OX=9606 GN=PLS1 PE=1 SV=2
607	529	Q8IWA5|CTL2_HUMAN	Q8IWA5	CTL2	HUMAN	129.96	8	5	6	6	5	11359	13423	7910.6	3111.8	7	7	6	9	6	3	Carbamidomethylation; Deamidation (NQ)	80124	Choline transporter-like protein 2 OS=Homo sapiens OX=9606 GN=SLC44A2 PE=1 SV=3
600	543	P01008|ANT3_HUMAN	P01008	ANT3	HUMAN	129.9	21	15	15	11	11	1834.6	5511.4	4038.2	1401.5	6	6	6	9	6	4	Carbamidomethylation	52602	Antithrombin-III OS=Homo sapiens OX=9606 GN=SERPINC1 PE=1 SV=1
608	733	Q15366|PCBP2_HUMAN	Q15366	PCBP2	HUMAN	129.35	16	16	16	16	16	2767.8	2303.9	1431.2	1424.6	4	2	4	7	5	8	Carbamidomethylation; Oxidation (M)	38580	Poly(rC)-binding protein 2 OS=Homo sapiens OX=9606 GN=PCBP2 PE=1 SV=1
292	1060	A0A075B6K5|LV39_HUMAN	A0A075B6K5	LV39	HUMAN	129.32	33	33	33	33	23	21823	23065	9666.1	12144	3	3	21	27	19	20	Carbamidomethylation; Deamidation (NQ); Acetylation (Protein N-term)	12332	Immunoglobulin lambda variable 3-9 OS=Homo sapiens OX=9606 GN=IGLV3-9 PE=3 SV=1
670	622	P61978|HNRPK_HUMAN	P61978	HNRPK	HUMAN	129.09	13	10	10	9	7	3025	3109.3	1608.9	2688.1	5	5	5	4	8	3	Carbamidomethylation	50976	Heterogeneous nuclear ribonucleoprotein K OS=Homo sapiens OX=9606 GN=HNRNPK PE=1 SV=1
492	990	A0A0C4DH31|HV118_HUMAN	A0A0C4DH31	HV118	HUMAN	128.68	36	12	21	26	26	2122.5	0	1494.7	2370.8	4	2	9	11	9	8	Carbamidomethylation; Carbamylation; Acetylation (Protein N-term)	12820	Immunoglobulin heavy variable 1-18 OS=Homo sapiens OX=9606 GN=IGHV1-18 PE=3 SV=1
481	959	P23083|HV102_HUMAN	P23083	HV102	HUMAN	128.58	32	22	21	11	11	8338.4	2776.1	1095.7	1207.8	4	2	14	12	7	6	Carbamidomethylation; Carbamylation; Acetylation (Protein N-term)	13085	Immunoglobulin heavy variable 1-2 OS=Homo sapiens OX=9606 GN=IGHV1-2 PE=1 SV=2
598	496	P05089|ARGI1_HUMAN	P05089	ARGI1	HUMAN	128.47	25	21	16	13	13	5885.7	5901.3	3253.1	925.86	8	8	8	6	7	4		34735	Arginase-1 OS=Homo sapiens OX=9606 GN=ARG1 PE=1 SV=2
609	360	B0I1T2|MYO1G_HUMAN	B0I1T2	MYO1G	HUMAN	128.23	13	9	7	1	5	4926.8	1221.5	0	3009.8	11	11	12	6	1	5	Carbamidomethylation; Deamidation (NQ)	116442	Unconventional myosin-Ig OS=Homo sapiens OX=9606 GN=MYO1G PE=1 SV=2
667	567	P53990|IST1_HUMAN	P53990	IST1	HUMAN	128.22	15	10	13	10	7	6512	7160.4	4790.3	2196.2	6	6	5	6	5	4	Carbamidomethylation	39751	IST1 homolog OS=Homo sapiens OX=9606 GN=IST1 PE=1 SV=1
772	759	P46976|GLYG_HUMAN	P46976	GLYG	HUMAN	128.2	15	15	7	7	11	7176.5	1738.4	1466.5	2120.6	4	4	5	4	2	4	Carbamidomethylation; Deamidation (NQ); Acetylation (Protein N-term)	39384	Glycogenin-1 OS=Homo sapiens OX=9606 GN=GYG1 PE=1 SV=4
601	513	O60235|TM11D_HUMAN	O60235	TM11D	HUMAN	127.86	16	9	14	8	7	9544.8	3263	1440.9	496.38	7	6	8	11	3	3	Deamidation (NQ)	46264	Transmembrane protease serine 11D OS=Homo sapiens OX=9606 GN=TMPRSS11D PE=1 SV=1
650	479	P28482|MK01_HUMAN	P28482	MK01	HUMAN	127.86	19	12	9	11	13	4199.9	1014.8	1414	3496.2	7	7	7	3	6	5	Carbamidomethylation; Acetylation (Protein N-term)	41390	Mitogen-activated protein kinase 1 OS=Homo sapiens OX=9606 GN=MAPK1 PE=1 SV=3
563	467	Q99439|CNN2_HUMAN	Q99439	CNN2	HUMAN	127.72	34	15	24	22	15	1390.1	5024	3114	4061	9	9	4	10	7	7	Carbamidomethylation; Deamidation (NQ)	33697	Calponin-2 OS=Homo sapiens OX=9606 GN=CNN2 PE=1 SV=4
642	509	P13807|GYS1_HUMAN	P13807	GYS1	HUMAN	127.7	11	9	6	6	5	7031.9	5541.2	13986	0	7	7	8	6	5	3		83786	Glycogen [starch] synthase muscle OS=Homo sapiens OX=9606 GN=GYS1 PE=1 SV=2
654	404	P30520|PURA2_HUMAN	P30520	PURA2	HUMAN	127.45	23	23	17	0	5	8795.1	5672.8		0	8	8	11	8	0	2	Carbamidomethylation	50097	Adenylosuccinate synthetase isozyme 2 OS=Homo sapiens OX=9606 GN=ADSS2 PE=1 SV=3
587	438	O75367|H2AY_HUMAN	O75367	H2AY	HUMAN	127.4	26	22	10	8	13	4957.7	4494.3	1048	3222.5	7	7	8	6	4	8	Carbamidomethylation	39617	Core histone macro-H2A.1 OS=Homo sapiens OX=9606 GN=MACROH2A1 PE=1 SV=4
239	856	P0C0S5|H2AZ_HUMAN	P0C0S5	H2AZ	HUMAN	127.31	46	46	35	12	12	948.99	0			4	2	25	23	28	32	Carbamylation; Deamidation (NQ); Acetylation (Protein N-term)	13553	Histone H2A.Z OS=Homo sapiens OX=9606 GN=H2AZ1 PE=1 SV=2
239	857	Q71UI9|H2AV_HUMAN	Q71UI9	H2AV	HUMAN	127.31	46	46	35	12	12	948.99	0			4	2	25	23	28	32	Carbamylation; Deamidation (NQ); Acetylation (Protein N-term)	13509	Histone H2A.V OS=Homo sapiens OX=9606 GN=H2AZ2 PE=1 SV=3
799	599	Q13277|STX3_HUMAN	Q13277	STX3	HUMAN	127.18	22	15	6	9	10	3419.5	939.78	2026.3	2495.1	6	6	5	2	3	4		33155	Syntaxin-3 OS=Homo sapiens OX=9606 GN=STX3 PE=1 SV=3
628	497	P30153|2AAA_HUMAN	P30153	2AAA	HUMAN	127.01	13	10	4	9	9	4162.9	2620.6	4855.6	4376.4	7	7	6	2	8	6	Carbamidomethylation	65309	Serine/threonine-protein phosphatase 2A 65 kDa regulatory subunit A alpha isoform OS=Homo sapiens OX=9606 GN=PPP2R1A PE=1 SV=4
389	645	P55058|PLTP_HUMAN	P55058	PLTP	HUMAN	126.48	12	12	12	11	12	15313	11136	9347.5	11142	5	5	13	17	11	13	Deamidation (NQ)	54739	Phospholipid transfer protein OS=Homo sapiens OX=9606 GN=PLTP PE=1 SV=1
570	862	Q9NP55|BPIA1_HUMAN	Q9NP55	BPIA1	HUMAN	126.47	25	25	25	25	25	4079.6	1846.5	4206.4	2637.3	4	4	6	6	7	9	Carbamidomethylation; Deamidation (NQ)	26713	BPI fold-containing family A member 1 OS=Homo sapiens OX=9606 GN=BPIFA1 PE=1 SV=1
806	700	Q92522|H1X_HUMAN	Q92522	H1X	HUMAN	126.02	23	6	6	23	18	724.66	521.83	2032	1733.7	5	5	1	2	6	4	Carbamylation	22487	Histone H1.10 OS=Homo sapiens OX=9606 GN=H1-10 PE=1 SV=1
377	1275	P06310|KV230_HUMAN	P06310	KV230	HUMAN	125.44	20	17	17	17	20	11093	3646.3	2861	2846	3	2	16	21	9	12	Carbamylation; Deamidation (NQ); Acetylation (Protein N-term)	13185	Immunoglobulin kappa variable 2-30 OS=Homo sapiens OX=9606 GN=IGKV2-30 PE=3 SV=2
784	554	Q5SSJ5|HP1B3_HUMAN	Q5SSJ5	HP1B3	HUMAN	125.34	12	4	8	8	6	1191.4	1978.8	2002.7	1330.6	6	6	2	4	5	3	Acetylation (Protein N-term)	61207	Heterochromatin protein 1-binding protein 3 OS=Homo sapiens OX=9606 GN=HP1BP3 PE=1 SV=1
580	659	P01116|RASK_HUMAN	P01116	RASK	HUMAN	125.27	33	33	33	25	25	2757.1	1615.6	1761.2	1597.3	5	2	10	6	6	5	Carbamidomethylation	21656	GTPase KRas OS=Homo sapiens OX=9606 GN=KRAS PE=1 SV=1
633	723	Q9Y696|CLIC4_HUMAN	Q9Y696	CLIC4	HUMAN	124.56	26	21	14	20	11	3987.6	4938.5	4465.7	2133.6	5	5	5	6	5	6	Carbamidomethylation	28772	Chloride intracellular channel protein 4 OS=Homo sapiens OX=9606 GN=CLIC4 PE=1 SV=4
220	918	P35900|K1C20_HUMAN	P35900	K1C20	HUMAN	124.47	7	4	4	4	7				398.72	6	1	9	19	47	48	Carbamylation; Deamidation (NQ)	48487	Keratin type I cytoskeletal 20 OS=Homo sapiens OX=9606 GN=KRT20 PE=1 SV=1
704	587	Q9UK41|VPS28_HUMAN	Q9UK41	VPS28	HUMAN	124.38	32	19	18	15	17	2476.9	3267.3	2287.7	0	7	7	7	4	4	3	Carbamidomethylation	25425	Vacuolar protein sorting-associated protein 28 homolog OS=Homo sapiens OX=9606 GN=VPS28 PE=1 SV=1
660	570	Q9H9H4|VP37B_HUMAN	Q9H9H4	VP37B	HUMAN	124.29	28	25	20	14	13	4367.9	3969.2	1934.7	2469.6	7	7	9	6	3	3		31307	Vacuolar protein sorting-associated protein 37B OS=Homo sapiens OX=9606 GN=VPS37B PE=1 SV=1
511	504	P61020|RAB5B_HUMAN	P61020	RAB5B	HUMAN	124.2	40	33	33	10	28	2799.5	1712.8		6456.1	7	4	8	10	7	10	Carbamylation; Deamidation (NQ)	23707	Ras-related protein Rab-5B OS=Homo sapiens OX=9606 GN=RAB5B PE=1 SV=1
596	454	P60842|IF4A1_HUMAN	P60842	IF4A1	HUMAN	124.11	21	15	10	16	12	0	0	0	653.42	8	2	6	4	9	6	Carbamidomethylation	46154	Eukaryotic initiation factor 4A-I OS=Homo sapiens OX=9606 GN=EIF4A1 PE=1 SV=1
688	535	Q96QK1|VPS35_HUMAN	Q96QK1	VPS35	HUMAN	124.09	10	7	4	8	4	5069.6	838.62	3108.8	3165.1	7	7	5	3	7	4	Carbamidomethylation; Oxidation (M)	91707	Vacuolar protein sorting-associated protein 35 OS=Homo sapiens OX=9606 GN=VPS35 PE=1 SV=2
625	503	Q99829|CPNE1_HUMAN	Q99829	CPNE1	HUMAN	123.96	12	9	11	9	6	2037.2	2455.5	2685.6	1577.4	8	8	7	6	5	4	Carbamidomethylation	59059	Copine-1 OS=Homo sapiens OX=9606 GN=CPNE1 PE=1 SV=1
604	740	Q9UBI6|GBG12_HUMAN	Q9UBI6	GBG12	HUMAN	123.96	76	57	76	35	44	14483	17491	6321.2	1215.4	5	5	8	7	4	6	Carbamidomethylation; Deamidation (NQ)	8006	Guanine nucleotide-binding protein G(I)/G(S)/G(O) subunit gamma-12 OS=Homo sapiens OX=9606 GN=GNG12 PE=1 SV=3
589	445	O60218|AK1BA_HUMAN	O60218	AK1BA	HUMAN	123.42	35	17	23	11	18	4873.4	5808.9	2926.6	6615.9	10	10	7	7	6	7	Carbamidomethylation; Deamidation (NQ); Acetylation (Protein N-term)	36020	Aldo-keto reductase family 1 member B10 OS=Homo sapiens OX=9606 GN=AKR1B10 PE=1 SV=2
588	481	P21281|VATB2_HUMAN	P21281	VATB2	HUMAN	123.32	16	12	10	14	10	2696.6	551.62	433.3	373.36	7	4	5	7	9	5	Carbamidomethylation	56501	V-type proton ATPase subunit B brain isoform OS=Homo sapiens OX=9606 GN=ATP6V1B2 PE=1 SV=3
403	839	Q8N0Y7|PGAM4_HUMAN	Q8N0Y7	PGAM4	HUMAN	123.3	24	18	24	18	18		0			5	1	15	19	8	10	Carbamylation; Deamidation (NQ); Acetylation (Protein N-term)	28777	Probable phosphoglycerate mutase 4 OS=Homo sapiens OX=9606 GN=PGAM4 PE=3 SV=1
724	538	Q5VT79|AXA81_HUMAN	Q5VT79	AXA81	HUMAN	122.87	30	11	18	17	9	4961	1742.7	1844.1	1039	8	8	5	4	4	4	Carbamidomethylation	36879	Annexin A8-like protein 1 OS=Homo sapiens OX=9606 GN=ANXA8L1 PE=2 SV=2
541	628	P18085|ARF4_HUMAN	P18085	ARF4	HUMAN	122.86	43	20	20	27	27	4679.6	4433.7	5417.7	3425.3	6	3	6	8	9	8		20511	ADP-ribosylation factor 4 OS=Homo sapiens OX=9606 GN=ARF4 PE=1 SV=3
848	619	P01019|ANGT_HUMAN	P01019	ANGT	HUMAN	122.74	16	13	12	4	0	3896.8	1509.2	2380.2		6	6	5	5	2	0		53154	Angiotensinogen OS=Homo sapiens OX=9606 GN=AGT PE=1 SV=1
548	1694	P29034|S10A2_HUMAN	P29034	S10A2	HUMAN	122.52	28	28	28	28	28	7483.7	8364.3	11241	2452.2	4	4	6	7	8	9	Carbamidomethylation	11117	Protein S100-A2 OS=Homo sapiens OX=9606 GN=S100A2 PE=1 SV=3
793	859	Q9BS26|ERP44_HUMAN	Q9BS26	ERP44	HUMAN	121.73	11	9	5	7	5	1863.1	0	1526.6	0	4	4	4	2	5	3	Carbamidomethylation	46971	Endoplasmic reticulum resident protein 44 OS=Homo sapiens OX=9606 GN=ERP44 PE=1 SV=1
880	671	P43034|LIS1_HUMAN	P43034	LIS1	HUMAN	121.65	17	13	15	2	0	3060	2313.8	626.22		5	5	6	4	1	0	Carbamidomethylation	46638	Platelet-activating factor acetylhydrolase IB subunit beta OS=Homo sapiens OX=9606 GN=PAFAH1B1 PE=1 SV=2
674	898	O75594|PGRP1_HUMAN	O75594	PGRP1	HUMAN	121.27	28	28	20	20	12	6376.3	2746.5	839.38	663.66	3	3	11	4	3	2	Carbamidomethylation; Deamidation (NQ)	21731	Peptidoglycan recognition protein 1 OS=Homo sapiens OX=9606 GN=PGLYRP1 PE=1 SV=1
703	501	P19440|GGT1_HUMAN	P19440	GGT1	HUMAN	121.03	13	10	8	7	6	4319.4	4621.4	818.73	3121.8	7	7	7	4	4	3	Carbamidomethylation	61410	Glutathione hydrolase 1 proenzyme OS=Homo sapiens OX=9606 GN=GGT1 PE=1 SV=2
581	506	P62140|PP1B_HUMAN	P62140	PP1B	HUMAN	120.98	26	26	14	14	14	1565.9	2251.1	1727.8	1314.9	7	2	13	6	4	4	Carbamidomethylation; Deamidation (NQ); Acetylation (Protein N-term)	37187	Serine/threonine-protein phosphatase PP1-beta catalytic subunit OS=Homo sapiens OX=9606 GN=PPP1CB PE=1 SV=3
759	520	Q01814|AT2B2_HUMAN	Q01814	AT2B2	HUMAN	120.87	6	2	4	4	3		1119.8	566.96		6	3	2	6	4	3	Deamidation (NQ)	136876	Plasma membrane calcium-transporting ATPase 2 OS=Homo sapiens OX=9606 GN=ATP2B2 PE=1 SV=2
545	602	P51153|RAB13_HUMAN	P51153	RAB13	HUMAN	120.85	31	22	15	20	11	875.05	0	2746.6	991.81	6	3	9	6	10	6	Carbamylation; Deamidation (NQ)	22774	Ras-related protein Rab-13 OS=Homo sapiens OX=9606 GN=RAB13 PE=1 SV=1
677	739	P02765|FETUA_HUMAN	P02765	FETUA	HUMAN	120.42	16	12	8	10	12	1667.4	1590.2	5417.7	6080.8	5	5	3	3	5	9	Carbamidomethylation	39341	Alpha-2-HS-glycoprotein OS=Homo sapiens OX=9606 GN=AHSG PE=1 SV=2
616	690	Q13404|UB2V1_HUMAN	Q13404	UB2V1	HUMAN	120.35	35	29	24	18	24	1249.2	0	1302.9	909.77	5	2	4	5	4	10	Deamidation (NQ)	16495	Ubiquitin-conjugating enzyme E2 variant 1 OS=Homo sapiens OX=9606 GN=UBE2V1 PE=1 SV=2
719	406	P28838|AMPL_HUMAN	P28838	AMPL	HUMAN	120.31	26	17	14	2	5	2609.1	2708.1	462.74	1066.7	10	10	7	7	1	2	Carbamidomethylation; Deamidation (NQ); Oxidation (M)	56166	Cytosol aminopeptidase OS=Homo sapiens OX=9606 GN=LAP3 PE=1 SV=3
617	432	P61247|RS3A_HUMAN	P61247	RS3A	HUMAN	120.2	31	17	14	16	26	2102.6	1643.2	1374.6	1853.8	7	7	5	4	5	9	Carbamidomethylation	29945	40S ribosomal protein S3a OS=Homo sapiens OX=9606 GN=RPS3A PE=1 SV=2
881	778	P49862|KLK7_HUMAN	P49862	KLK7	HUMAN	120.18	16	6	6	13	13	751.69	640.69	3119.5	4491.9	4	4	1	1	4	5	Carbamidomethylation; Deamidation (NQ)	27525	Kallikrein-7 OS=Homo sapiens OX=9606 GN=KLK7 PE=1 SV=1
627	453	P20073|ANXA7_HUMAN	P20073	ANXA7	HUMAN	119.9	17	11	6	12	11	3243.1	6514.9	6989.3	8330.3	8	8	6	4	6	7		52739	Annexin A7 OS=Homo sapiens OX=9606 GN=ANXA7 PE=1 SV=3
638	500	O15389|SIGL5_HUMAN	O15389	SIGL5	HUMAN	119.82	19	11	12	4	11	4510.3	5798.4	2389	3900.5	7	7	6	5	4	7	Carbamidomethylation; Deamidation (NQ); Oxidation (M)	60715	Sialic acid-binding Ig-like lectin 5 OS=Homo sapiens OX=9606 GN=SIGLEC5 PE=1 SV=1
980	741	P02774|VTDB_HUMAN	P02774	VTDB	HUMAN	119.6	12	10	6	4	0	1540.4	473.98	423.02		4	4	4	3	1	0	Carbamidomethylation	52918	Vitamin D-binding protein OS=Homo sapiens OX=9606 GN=GC PE=1 SV=2
1011	703	P00492|HPRT_HUMAN	P00492	HPRT	HUMAN	119.3	25	25	11	6	0	2152.6	576.93	477.42		5	5	5	2	1	0	Carbamidomethylation	24579	Hypoxanthine-guanine phosphoribosyltransferase OS=Homo sapiens OX=9606 GN=HPRT1 PE=1 SV=2
946	819	Q5D862|FILA2_HUMAN	Q5D862	FILA2	HUMAN	119.26	2	0	0	2	2			1950.3	3125.8	4	4	0	0	5	4	Carbamidomethylation; Deamidation (NQ)	248072	Filaggrin-2 OS=Homo sapiens OX=9606 GN=FLG2 PE=1 SV=1
386	1042	P32320|CDD_HUMAN	P32320	CDD	HUMAN	119.23	32	32	32	32	32	10333	8697.6	5763.6	2248.3	3	3	16	12	15	12	Carbamidomethylation; Carbamylation; Deamidation (NQ); Oxidation (M); Acetylation (Protein N-term)	16185	Cytidine deaminase OS=Homo sapiens OX=9606 GN=CDA PE=1 SV=2
249	1016	P06312|KV401_HUMAN	P06312	KV401	HUMAN	118.98	30	30	30	22	22	16327	9601.9	5765.5	6746.2	3	3	34	37	19	12	Carbamylation; Deamidation (NQ)	13380	Immunoglobulin kappa variable 4-1 OS=Homo sapiens OX=9606 GN=IGKV4-1 PE=1 SV=1
819	632	Q96NY7|CLIC6_HUMAN	Q96NY7	CLIC6	HUMAN	118.94	15	10	9	0	1	3759.6	3313.3		702.56	6	6	6	6	0	1	Carbamidomethylation	73012	Chloride intracellular channel protein 6 OS=Homo sapiens OX=9606 GN=CLIC6 PE=2 SV=3
742	702	O00748|EST2_HUMAN	O00748	EST2	HUMAN	118.79	8	6	4	6	4	2252.4	1490.6	1464.2	1442.8	5	5	5	3	4	4		61807	Cocaine esterase OS=Homo sapiens OX=9606 GN=CES2 PE=1 SV=1
656	440	P02649|APOE_HUMAN	P02649	APOE	HUMAN	118.79	28	17	16	14	16	4656.4	1602.9	2704	3211.9	8	8	5	6	5	5	Carbamidomethylation	36154	Apolipoprotein E OS=Homo sapiens OX=9606 GN=APOE PE=1 SV=1
622	1056	Q9UGL9|CRCT1_HUMAN	Q9UGL9	CRCT1	HUMAN	118.7	61	61	61	51	29	6742.2	8148.9	579.95	2327.9	3	3	11	7	4	1	Carbamidomethylation; Acetylation (Protein N-term)	9736	Cysteine-rich C-terminal protein 1 OS=Homo sapiens OX=9606 GN=CRCT1 PE=1 SV=1
171	1015	P01766|HV313_HUMAN	P01766	HV313	HUMAN	118.7	25	25	25	25	25	7825.3	7365.6	0	595.01	3	1	57	59	30	33	Carbamidomethylation; Carbamylation; Deamidation (NQ); Oxidation (M); Acetylation (Protein N-term)	12506	Immunoglobulin heavy variable 3-13 OS=Homo sapiens OX=9606 GN=IGHV3-13 PE=1 SV=2
664	523	P23634|AT2B4_HUMAN	P23634	AT2B4	HUMAN	118.61	6	5	3	4	4	1373.7	0	0	889.81	6	3	7	4	4	5	Carbamidomethylation; Deamidation (NQ)	137920	Plasma membrane calcium-transporting ATPase 4 OS=Homo sapiens OX=9606 GN=ATP2B4 PE=1 SV=2
610	519	Q99102|MUC4_HUMAN	Q99102	MUC4	HUMAN	118.33	4	4	3	2	2	7691.9	4270.1	2044.8	735.25	7	7	9	7	4	4	Carbamidomethylation; Deamidation (NQ)	231516	Mucin-4 OS=Homo sapiens OX=9606 GN=MUC4 PE=1 SV=4
940	686	O43291|SPIT2_HUMAN	O43291	SPIT2	HUMAN	118.26	24	9	10	24	0	1112.7	785.4	1797		5	5	2	2	5	0	Carbamidomethylation	28228	Kunitz-type protease inhibitor 2 OS=Homo sapiens OX=9606 GN=SPINT2 PE=1 SV=2
833	649	P20591|MX1_HUMAN	P20591	MX1	HUMAN	118.18	11	8	6	4	1	1149.6	1581.9	1063.6	676.23	5	4	6	3	2	1		75520	Interferon-induced GTP-binding protein Mx1 OS=Homo sapiens OX=9606 GN=MX1 PE=1 SV=4
705	802	P05388|RLA0_HUMAN	P05388	RLA0	HUMAN	118.17	17	14	10	17	17	1660.2	2490.4	2509.5	3646.4	4	4	3	4	4	7	Carbamidomethylation; Deamidation (NQ)	34274	60S acidic ribosomal protein P0 OS=Homo sapiens OX=9606 GN=RPLP0 PE=1 SV=1
705	813	Q8NHW5|RLA0L_HUMAN	Q8NHW5	RLA0L	HUMAN	118.17	17	14	10	17	17	1660.2	2490.4	2509.5	3646.4	4	4	3	4	4	7	Carbamidomethylation; Deamidation (NQ)	34364	60S acidic ribosomal protein P0-like OS=Homo sapiens OX=9606 GN=RPLP0P6 PE=5 SV=1
611	585	P62136|PP1A_HUMAN	P62136	PP1A	HUMAN	118.11	22	22	14	14	11	916.79	893.29	975.95		6	1	10	6	5	3	Carbamidomethylation; Deamidation (NQ)	37512	Serine/threonine-protein phosphatase PP1-alpha catalytic subunit OS=Homo sapiens OX=9606 GN=PPP1CA PE=1 SV=1
699	537	Q7Z5R6|AB1IP_HUMAN	Q7Z5R6	AB1IP	HUMAN	118.09	12	8	6	6	6	2329.9	2430.8	915.05	501.98	7	7	6	4	4	4	Carbamidomethylation	73183	Amyloid beta A4 precursor protein-binding family B member 1-interacting protein OS=Homo sapiens OX=9606 GN=APBB1IP PE=1 SV=1
832	476	P63010|AP2B1_HUMAN	P63010	AP2B1	HUMAN	117.99	9	7	4	1	2	556.52	1636	0		8	3	6	3	1	2	Carbamidomethylation	104553	AP-2 complex subunit beta OS=Homo sapiens OX=9606 GN=AP2B1 PE=1 SV=1
514	730	Q13162|PRDX4_HUMAN	Q13162	PRDX4	HUMAN	117.85	19	14	11	15	15	5282.4	5091.3	2967.4	2656.1	6	3	9	7	10	9	Deamidation (NQ)	30540	Peroxiredoxin-4 OS=Homo sapiens OX=9606 GN=PRDX4 PE=1 SV=1
769	946	Q92597|NDRG1_HUMAN	Q92597	NDRG1	HUMAN	117.72	11	11	7	7	7	2213	1985.4	1889.5	2187.8	3	3	4	3	4	4	Carbamidomethylation	42835	Protein NDRG1 OS=Homo sapiens OX=9606 GN=NDRG1 PE=1 SV=1
676	689	P01111|RASN_HUMAN	P01111	RASN	HUMAN	117.69	31	31	20	26	17	856.56			521.81	5	1	7	4	5	4	Carbamylation; Deamidation (NQ)	21229	GTPase NRas OS=Homo sapiens OX=9606 GN=NRAS PE=1 SV=1
770	534	O15335|CHAD_HUMAN	O15335	CHAD	HUMAN	117.45	21	3	3	21	18	579.27	439.41	2565.8	2959	6	6	1	1	6	7	Carbamidomethylation	40476	Chondroadherin OS=Homo sapiens OX=9606 GN=CHAD PE=1 SV=2
860	717	Q13200|PSMD2_HUMAN	Q13200	PSMD2	HUMAN	117.43	7	5	3	2	2	3371.5	1348	560.41	4113.9	5	5	6	3	1	2	Oxidation (M); Acetylation (Protein N-term)	100200	26S proteasome non-ATPase regulatory subunit 2 OS=Homo sapiens OX=9606 GN=PSMD2 PE=1 SV=3
805	630	O75369|FLNB_HUMAN	O75369	FLNB	HUMAN	117.43	4	2	2	1	0	1215.7	837.32	0		10	5	7	5	2	0	Carbamidomethylation; Deamidation (NQ)	278162	Filamin-B OS=Homo sapiens OX=9606 GN=FLNB PE=1 SV=2
602	966	Q13183|S13A2_HUMAN	Q13183	S13A2	HUMAN	117.37	8	7	6	7	7	2977.8	3163	2966.9	2701.6	4	4	6	6	6	7	Carbamidomethylation; Deamidation (NQ)	64410	Solute carrier family 13 member 2 OS=Homo sapiens OX=9606 GN=SLC13A2 PE=1 SV=1
698	680	P00505|AATM_HUMAN	P00505	AATM	HUMAN	117.36	11	9	9	3	9	4912.4	3912.1	410.36	1427.6	6	6	5	6	1	6	Carbamidomethylation	47518	Aspartate aminotransferase mitochondrial OS=Homo sapiens OX=9606 GN=GOT2 PE=1 SV=3
870	663	P57737|CORO7_HUMAN	P57737	CORO7	HUMAN	117.32	7	5	2	1	3	1714.3	0	1135.3	1534.1	6	6	4	2	1	4	Carbamidomethylation	100605	Coronin-7 OS=Homo sapiens OX=9606 GN=CORO7 PE=1 SV=2
956	691	P17927|CR1_HUMAN	P17927	CR1	HUMAN	117.28	4	2	3	0	0	1265.6	1303.5			6	6	4	5	0	0	Carbamidomethylation	223661	Complement receptor type 1 OS=Homo sapiens OX=9606 GN=CR1 PE=1 SV=3
282	874	P01619|KV320_HUMAN	P01619	KV320	HUMAN	117.23	47	47	47	28	22	39792	59272	20045	18655	4	2	26	26	22	16	Carbamylation	12557	Immunoglobulin kappa variable 3-20 OS=Homo sapiens OX=9606 GN=IGKV3-20 PE=1 SV=2
775	669	Q6ZVX7|FBX50_HUMAN	Q6ZVX7	FBX50	HUMAN	117.21	20	7	7	10	17	761.66	5575.6	14977	5577.5	5	5	3	2	5	5		30847	F-box only protein 50 OS=Homo sapiens OX=9606 GN=NCCRP1 PE=1 SV=1
488	950	P34910|EVI2B_HUMAN	P34910	EVI2B	HUMAN	117.19	10	10	10	10	10	4575.2	4477.3	3587.8	2678.8	4	4	13	9	9	7	Carbamidomethylation; Deamidation (NQ)	48666	Protein EVI2B OS=Homo sapiens OX=9606 GN=EVI2B PE=1 SV=2
744	749	P48735|IDHP_HUMAN	P48735	IDHP	HUMAN	117.12	14	5	7	10	11	1559.5	1390.5	2490.2	2490.9	5	4	2	4	5	5	Carbamidomethylation; Oxidation (M)	50909	Isocitrate dehydrogenase [NADP] mitochondrial OS=Homo sapiens OX=9606 GN=IDH2 PE=1 SV=2
373	1044	P60033|CD81_HUMAN	P60033	CD81	HUMAN	117.04	25	25	18	25	18	12625	6162.2	4494.9	3819.4	3	3	15	18	14	12	Carbamidomethylation; Deamidation (NQ)	25809	CD81 antigen OS=Homo sapiens OX=9606 GN=CD81 PE=1 SV=1
637	550	Q14974|IMB1_HUMAN	Q14974	IMB1	HUMAN	116.89	10	6	5	5	3	4680.7	2435.1	3023.5	449.15	8	8	6	5	5	6	Acetylation (Protein N-term)	97170	Importin subunit beta-1 OS=Homo sapiens OX=9606 GN=KPNB1 PE=1 SV=2
679	865	A0A075B6K4|LV310_HUMAN	A0A075B6K4	LV310	HUMAN	116.51	36	36	17	16	16	7133.4	6858.6	16568	10065	5	4	6	5	5	4	Carbamidomethylation; Carbamylation	12441	Immunoglobulin lambda variable 3-10 OS=Homo sapiens OX=9606 GN=IGLV3-10 PE=3 SV=2
760	745	P54707|AT12A_HUMAN	P54707	AT12A	HUMAN	116.5	7	3	3	5	2			2618.3		6	2	5	4	4	2	Carbamidomethylation; Carbamylation; Oxidation (M)	115510	Potassium-transporting ATPase alpha chain 2 OS=Homo sapiens OX=9606 GN=ATP12A PE=1 SV=3
702	531	P07741|APT_HUMAN	P07741	APT	HUMAN	116.38	51	27	24	25	17	2343.7	2174.3	2421.7	2314.4	7	7	4	4	4	6	Carbamidomethylation; Acetylation (Protein N-term)	19608	Adenine phosphoribosyltransferase OS=Homo sapiens OX=9606 GN=APRT PE=1 SV=2
558	664	P26447|S10A4_HUMAN	P26447	S10A4	HUMAN	116.35	46	46	37	28	37	14243	14106	16003	7299.5	6	6	9	7	7	6		11729	Protein S100-A4 OS=Homo sapiens OX=9606 GN=S100A4 PE=1 SV=1
831	524	P01042|KNG1_HUMAN	P01042	KNG1	HUMAN	116.13	15	14	0	3	4	3175.8		1534.7	583.05	8	8	7	0	3	2	Carbamidomethylation	71957	Kininogen-1 OS=Homo sapiens OX=9606 GN=KNG1 PE=1 SV=2
657	488	O14672|ADA10_HUMAN	O14672	ADA10	HUMAN	116.06	12	10	9	1	4	1868.2	4736.8	1353.1	725.77	8	8	7	9	1	4	Carbamidomethylation	84142	Disintegrin and metalloproteinase domain-containing protein 10 OS=Homo sapiens OX=9606 GN=ADAM10 PE=1 SV=1
743	525	O00468|AGRIN_HUMAN	O00468	AGRIN	HUMAN	116.05	5	3	1	3	2	550.82	1179.3	1207.2	655.36	7	7	5	2	6	4	Carbamidomethylation	217318	Agrin OS=Homo sapiens OX=9606 GN=AGRN PE=1 SV=6
691	657	P46781|RS9_HUMAN	P46781	RS9	HUMAN	116.02	30	16	9	30	22	2360.8	933.45	5281.9	1795.3	6	6	3	2	7	7		22591	40S ribosomal protein S9 OS=Homo sapiens OX=9606 GN=RPS9 PE=1 SV=3
448	704	P08637|FCG3A_HUMAN	P08637	FCG3A	HUMAN	116.02	19	15	12	8	19	0	0		1169.2	5	2	11	10	9	15	Carbamidomethylation; Deamidation (NQ)	29089	Low affinity immunoglobulin gamma Fc region receptor III-A OS=Homo sapiens OX=9606 GN=FCGR3A PE=1 SV=2
164	854	A0A0C4DH32|HV320_HUMAN	A0A0C4DH32	HV320	HUMAN	115.95	28	19	28	19	19		775.43			5	1	59	62	30	32	Carbamidomethylation; Carbamylation; Deamidation (NQ); Oxidation (M); Acetylation (Protein N-term)	12673	Immunoglobulin heavy variable 3-20 OS=Homo sapiens OX=9606 GN=IGHV3-20 PE=3 SV=2
903	757	P53004|BIEA_HUMAN	P53004	BIEA	HUMAN	115.78	18	16	11	7	3	3554.5	2133.8	3292	834.99	5	5	4	3	2	1		33428	Biliverdin reductase A OS=Homo sapiens OX=9606 GN=BLVRA PE=1 SV=2
655	678	P27797|CALR_HUMAN	P27797	CALR	HUMAN	115.7	16	12	12	10	6	4348.9	2996.6	570.46	1155.3	5	5	5	5	5	6	Carbamidomethylation	48142	Calreticulin OS=Homo sapiens OX=9606 GN=CALR PE=1 SV=1
731	726	P08865|RSSA_HUMAN	P08865	RSSA	HUMAN	115.61	22	16	18	8	13	747.77	2526.9	1312.5	1373.7	5	5	4	6	3	4	Carbamidomethylation; Acetylation (Protein N-term)	32854	40S ribosomal protein SA OS=Homo sapiens OX=9606 GN=RPSA PE=1 SV=4
718	812	Q58FG0|HS905_HUMAN	Q58FG0	HS905	HUMAN	115.49	14	12	5	10	3			0		5	1	5	4	5	3	Carbamidomethylation	38738	Putative heat shock protein HSP 90-alpha A5 OS=Homo sapiens OX=9606 GN=HSP90AA5P PE=2 SV=1
322	1389	P06331|HV434_HUMAN	P06331	HV434	HUMAN	115.43	22	22	22	20	20	17719	23250	11096	12297	3	2	32	27	8	8	Carbamidomethylation; Carbamylation	13815	Immunoglobulin heavy variable 4-34 OS=Homo sapiens OX=9606 GN=IGHV4-34 PE=1 SV=2
322	1644	P01825|HV459_HUMAN	P01825	HV459	HUMAN	115.43	23	23	23	22	22	17719	23250	11096	12297	3	2	32	27	8	8	Carbamidomethylation; Carbamylation	12936	Immunoglobulin heavy variable 4-59 OS=Homo sapiens OX=9606 GN=IGHV4-59 PE=1 SV=2
322	1645	P0DP08|HVD82_HUMAN	P0DP08	HVD82	HUMAN	115.43	23	23	23	21	21	17719	23250	11096	12297	3	2	32	27	8	8	Carbamidomethylation; Carbamylation	13016	Immunoglobulin heavy variable 4-38-2 OS=Homo sapiens OX=9606 GN=IGHV4-38-2 PE=3 SV=1
322	1646	A0A0C4DH41|HV461_HUMAN	A0A0C4DH41	HV461	HUMAN	115.43	23	23	23	21	21	17719	23250	11096	12297	3	2	32	27	8	8	Carbamidomethylation; Carbamylation	13066	Immunoglobulin heavy variable 4-61 OS=Homo sapiens OX=9606 GN=IGHV4-61 PE=3 SV=1
322	1647	P0DP06|HVD34_HUMAN	P0DP06	HVD34	HUMAN	115.43	23	23	23	21	21	17719	23250	11096	12297	3	2	32	27	8	8	Carbamidomethylation; Carbamylation	13156	Immunoglobulin heavy variable 4-30-4 OS=Homo sapiens OX=9606 GN=IGHV4-30-4 PE=3 SV=1
322	1648	P01824|HV439_HUMAN	P01824	HV439	HUMAN	115.43	22	22	22	20	20	17719	23250	11096	12297	3	2	32	27	8	8	Carbamidomethylation; Carbamylation	13917	Immunoglobulin heavy variable 4-39 OS=Homo sapiens OX=9606 GN=IGHV4-39 PE=1 SV=2
1032	742	Q08477|CP4F3_HUMAN	Q08477	CP4F3	HUMAN	115.41	9	2	0	4	8	556.17		1927.9	2091.7	4	4	1	0	3	4	Carbamidomethylation	59847	Cytochrome P450 4F3 OS=Homo sapiens OX=9606 GN=CYP4F3 PE=1 SV=2
913	675	Q15599|NHRF2_HUMAN	Q15599	NHRF2	HUMAN	115.4	18	14	7	7	7	2836.9	1918.4	1120.2	786.59	5	5	4	2	2	2	Carbamidomethylation; Deamidation (NQ)	37414	Na(+)/H(+) exchange regulatory cofactor NHE-RF2 OS=Homo sapiens OX=9606 GN=SLC9A3R2 PE=1 SV=2
941	897	P09651|ROA1_HUMAN	P09651	ROA1	HUMAN	115.39	15	13	8	3	0	388.51	1111.4	499.07		4	4	6	2	1	0		38747	Heterogeneous nuclear ribonucleoprotein A1 OS=Homo sapiens OX=9606 GN=HNRNPA1 PE=1 SV=5
962	653	P32121|ARRB2_HUMAN	P32121	ARRB2	HUMAN	115.33	15	13	7	2	3	5681.5	0	0	1201.7	5	5	5	2	1	1	Carbamidomethylation	46106	Beta-arrestin-2 OS=Homo sapiens OX=9606 GN=ARRB2 PE=1 SV=2
429	924	A0A0J9YXX1|HV5X1_HUMAN	A0A0J9YXX1	HV5X1	HUMAN	115.22	32	26	32	32	26	0	4798.5	2703.8	3182.1	4	2	11	17	8	12	Carbamidomethylation; Carbamylation; Oxidation (M); Acetylation (Protein N-term)	12773	Immunoglobulin heavy variable 5-10-1 OS=Homo sapiens OX=9606 GN=IGHV5-10-1 PE=3 SV=1
632	510	P15313|VATB1_HUMAN	P15313	VATB1	HUMAN	115.04	20	11	7	11	11	580.8	1185.8	1522.8	3342.6	9	6	6	5	5	6	Carbamidomethylation	56833	V-type proton ATPase subunit B kidney isoform OS=Homo sapiens OX=9606 GN=ATP6V1B1 PE=1 SV=3
778	849	P20648|ATP4A_HUMAN	P20648	ATP4A	HUMAN	115	5	5	3	3	3	0				4	1	6	4	2	2	Carbamylation; Oxidation (M)	114119	Potassium-transporting ATPase alpha chain 1 OS=Homo sapiens OX=9606 GN=ATP4A PE=2 SV=5
502	626	P07947|YES_HUMAN	P07947	YES	HUMAN	114.86	18	15	8	6	6	4377.4	693.18		1993.1	10	6	12	10	7	7	Carbamidomethylation	60801	Tyrosine-protein kinase Yes OS=Homo sapiens OX=9606 GN=YES1 PE=1 SV=3
476	944	A0A0C4DH38|HV551_HUMAN	A0A0C4DH38	HV551	HUMAN	114.68	34	34	21	34	34	1273.2		882.7	975.37	3	1	10	13	8	9	Carbamidomethylation; Carbamylation; Oxidation (M); Acetylation (Protein N-term)	12675	Immunoglobulin heavy variable 5-51 OS=Homo sapiens OX=9606 GN=IGHV5-51 PE=3 SV=1
812	561	P36955|PEDF_HUMAN	P36955	PEDF	HUMAN	114.53	17	12	8	7	3	2221.3	1799.5	2200	0	7	7	5	4	3	1	Carbamidomethylation	46312	Pigment epithelium-derived factor OS=Homo sapiens OX=9606 GN=SERPINF1 PE=1 SV=4
791	791	Q96KP4|CNDP2_HUMAN	Q96KP4	CNDP2	HUMAN	114.43	11	11	11	4	2	1615.4	2268.2	1301.1	724.21	5	5	6	5	2	1	Carbamylation; Oxidation (M)	52879	Cytosolic non-specific dipeptidase OS=Homo sapiens OX=9606 GN=CNDP2 PE=1 SV=2
174	1010	A0A0B4J1X8|HV343_HUMAN	A0A0B4J1X8	HV343	HUMAN	114.34	28	28	25	25	25	4694.3	3628.4	2596	2267.7	4	1	57	57	29	32	Carbamidomethylation; Carbamylation; Deamidation (NQ); Oxidation (M); Acetylation (Protein N-term)	13077	Immunoglobulin heavy variable 3-43 OS=Homo sapiens OX=9606 GN=IGHV3-43 PE=3 SV=1
395	804	O75015|FCG3B_HUMAN	O75015	FCG3B	HUMAN	114.34	20	20	13	19	12	5262.5	5298.9	2334.4		6	3	15	12	13	13	Carbamidomethylation; Deamidation (NQ)	26216	Low affinity immunoglobulin gamma Fc region receptor III-B OS=Homo sapiens OX=9606 GN=FCGR3B PE=1 SV=2
577	852	P01034|CYTC_HUMAN	P01034	CYTC	HUMAN	114.27	37	31	25	19	31	8186.7	6461	2928.4	4318.7	5	5	6	7	5	9	Carbamidomethylation; Oxidation (M)	15799	Cystatin-C OS=Homo sapiens OX=9606 GN=CST3 PE=1 SV=1
776	697	P61225|RAP2B_HUMAN	P61225	RAP2B	HUMAN	114.12	36	27	20	13	20	2657	5526.1	2721.3	3450.4	6	6	5	4	3	3	Carbamidomethylation	20504	Ras-related protein Rap-2b OS=Homo sapiens OX=9606 GN=RAP2B PE=1 SV=1
716	410	P34932|HSP74_HUMAN	P34932	HSP74	HUMAN	114.01	14	14	8	2	0	1797.6	1464.2	3258.3		9	9	10	6	1	0	Carbamidomethylation	94331	Heat shock 70 kDa protein 4 OS=Homo sapiens OX=9606 GN=HSPA4 PE=1 SV=4
781	716	Q9UL25|RAB21_HUMAN	Q9UL25	RAB21	HUMAN	113.92	29	24	16	20	15	4069.1	4784.5	3974.1	2616.2	5	5	5	4	3	2	Carbamidomethylation; Deamidation (NQ); Acetylation (Protein N-term)	24348	Ras-related protein Rab-21 OS=Homo sapiens OX=9606 GN=RAB21 PE=1 SV=3
767	494	P78371|TCPB_HUMAN	P78371	TCPB	HUMAN	113.88	16	12	9	4	9	2918.2	1656.2	610.96	879.23	6	6	5	4	3	3	Carbamidomethylation; Acetylation (Protein N-term)	57488	T-complex protein 1 subunit beta OS=Homo sapiens OX=9606 GN=CCT2 PE=1 SV=4
707	1038	P02652|APOA2_HUMAN	P02652	APOA2	HUMAN	113.44	44	44	22	22	43	9886	5261.7	7547.2	2249.6	5	5	5	4	5	4		11175	Apolipoprotein A-II OS=Homo sapiens OX=9606 GN=APOA2 PE=1 SV=1
669	522	P17858|PFKAL_HUMAN	P17858	PFKAL	HUMAN	113.4	12	7	5	6	8	2675.6	1828.7	1431.2	2124.9	7	5	8	3	3	6	Carbamidomethylation	85018	ATP-dependent 6-phosphofructokinase liver type OS=Homo sapiens OX=9606 GN=PFKL PE=1 SV=6
741	635	Q86VR7|VS10L_HUMAN	Q86VR7	VS10L	HUMAN	113.22	7	7	4	4	4	2524.4	2346.3	2700.8	726.44	5	5	5	4	4	3	Carbamidomethylation	91625	V-set and immunoglobulin domain-containing protein 10-like OS=Homo sapiens OX=9606 GN=VSIG10L PE=2 SV=2
820	775	P01033|TIMP1_HUMAN	P01033	TIMP1	HUMAN	112.91	33	6	28	21	11	2244.4	2760.5	2221.8	1578.7	5	5	1	4	6	2	Carbamidomethylation; Deamidation (NQ)	23171	Metalloproteinase inhibitor 1 OS=Homo sapiens OX=9606 GN=TIMP1 PE=1 SV=1
810	627	P05155|IC1_HUMAN	P05155	IC1	HUMAN	112.78	13	13	8	8	2	4820.6	1704.3	1146.8	2085.1	5	5	6	3	3	1	Carbamidomethylation	55154	Plasma protease C1 inhibitor OS=Homo sapiens OX=9606 GN=SERPING1 PE=1 SV=2
768	769	O95833|CLIC3_HUMAN	O95833	CLIC3	HUMAN	112.36	25	21	14	21	14	745.62	1433.4	2578.4	1411.2	5	5	4	3	4	4	Carbamidomethylation	26648	Chloride intracellular channel protein 3 OS=Homo sapiens OX=9606 GN=CLIC3 PE=1 SV=2
729	790	P52565|GDIR1_HUMAN	P52565	GDIR1	HUMAN	112.35	26	17	26	18	7	2341.4	5968.9	3604.7	1683.5	5	5	3	7	6	1		23207	Rho GDP-dissociation inhibitor 1 OS=Homo sapiens OX=9606 GN=ARHGDIA PE=1 SV=3
894	858	Q9BW30|TPPP3_HUMAN	Q9BW30	TPPP3	HUMAN	112.34	26	26	19	5	5	4933.5	1131.6	1046.8	828.88	5	5	5	4	1	1	Acetylation (Protein N-term)	18985	Tubulin polymerization-promoting protein family member 3 OS=Homo sapiens OX=9606 GN=TPPP3 PE=1 SV=1
797	894	P63241|IF5A1_HUMAN	P63241	IF5A1	HUMAN	112.18	42	36	37	5	10	846.01	1084	914.32	4661.5	5	5	6	4	1	3	Carbamidomethylation; Deamidation (NQ); Acetylation (Protein N-term)	16832	Eukaryotic translation initiation factor 5A-1 OS=Homo sapiens OX=9606 GN=EIF5A PE=1 SV=2
675	584	Q14240|IF4A2_HUMAN	Q14240	IF4A2	HUMAN	112.07	18	15	6	13	6	143.36				7	1	6	3	7	4	Carbamidomethylation; Deamidation (NQ)	46402	Eukaryotic initiation factor 4A-II OS=Homo sapiens OX=9606 GN=EIF4A2 PE=1 SV=2
318	771	Q8IUE6|H2A2B_HUMAN	Q8IUE6	H2A2B	HUMAN	111.91	40	35	12	7	12	3709.2	3172.1			4	1	17	17	21	23	Carbamylation; Deamidation (NQ); Acetylation (Protein N-term)	13995	Histone H2A type 2-B OS=Homo sapiens OX=9606 GN=H2AC21 PE=1 SV=3
932	515	P07814|SYEP_HUMAN	P07814	SYEP	HUMAN	111.8	6	2	2	2	0	1281.4	3557.9	1119.5		8	8	3	3	3	0	Carbamidomethylation; Carbamylation	170590	Bifunctional glutamate/proline--tRNA ligase OS=Homo sapiens OX=9606 GN=EPRS1 PE=1 SV=5
1002	583	P22626|ROA2_HUMAN	P22626	ROA2	HUMAN	111.3	24	24	4	0	0	4901.1	422.43			6	6	6	2	0	0	Carbamidomethylation; Deamidation (NQ)	37430	Heterogeneous nuclear ribonucleoproteins A2/B1 OS=Homo sapiens OX=9606 GN=HNRNPA2B1 PE=1 SV=2
948	698	P60900|PSA6_HUMAN	P60900	PSA6	HUMAN	111.25	28	28	9	0	0	4739.9	2438.2			6	6	7	2	0	0	Carbamidomethylation	27399	Proteasome subunit alpha type-6 OS=Homo sapiens OX=9606 GN=PSMA6 PE=1 SV=1
721	606	P49368|TCPG_HUMAN	P49368	TCPG	HUMAN	111.12	11	6	9	6	7	662.47	4876.2	1376	2973.3	6	6	4	6	3	4	Carbamidomethylation	60534	T-complex protein 1 subunit gamma OS=Homo sapiens OX=9606 GN=CCT3 PE=1 SV=4
753	736	P78417|GSTO1_HUMAN	P78417	GSTO1	HUMAN	111.02	23	16	13	14	10	6309.5	4017.2	2910.5	1376.3	6	6	4	5	5	2	Carbamidomethylation	27566	Glutathione S-transferase omega-1 OS=Homo sapiens OX=9606 GN=GSTO1 PE=1 SV=2
782	727	Q9UI12|VATH_HUMAN	Q9UI12	VATH	HUMAN	110.9	12	8	6	7	7	1957.4	648.41	1959.9	19705	5	5	3	3	4	4	Carbamidomethylation	55883	V-type proton ATPase subunit H OS=Homo sapiens OX=9606 GN=ATP6V1H PE=1 SV=1
838	618	Q9UNF0|PACN2_HUMAN	Q9UNF0	PACN2	HUMAN	110.83	13	11	2	2	2	2564.2	763.15	804.96	0	6	6	9	1	1	1	Carbamidomethylation	55739	Protein kinase C and casein kinase substrate in neurons protein 2 OS=Homo sapiens OX=9606 GN=PACSIN2 PE=1 SV=2
303	1055	A0A0C4DH25|KVD20_HUMAN	A0A0C4DH25	KVD20	HUMAN	110.36	28	28	28	28	22	23662	22907	7000.7	6920.6	3	1	23	23	20	16	Carbamylation	12515	Immunoglobulin kappa variable 3D-20 OS=Homo sapiens OX=9606 GN=IGKV3D-20 PE=3 SV=1
424	991	A0A0J9YX35|HV64D_HUMAN	A0A0J9YX35	HV64D	HUMAN	110.31	28	28	25	25	25	9352.6	31494	11647	19251	4	3	12	13	10	13	Carbamidomethylation; Carbamylation; Acetylation (Protein N-term)	12823	Immunoglobulin heavy variable 3-64D OS=Homo sapiens OX=9606 GN=IGHV3-64D PE=3 SV=1
762	752	Q14134|TRI29_HUMAN	Q14134	TRI29	HUMAN	110.04	9	4	6	4	4	0	2023.1	560.96	929.08	5	5	3	4	4	4	Carbamidomethylation	65835	Tripartite motif-containing protein 29 OS=Homo sapiens OX=9606 GN=TRIM29 PE=1 SV=2
706	887	Q14914|PTGR1_HUMAN	Q14914	PTGR1	HUMAN	110.04	13	9	8	8	8	2103.6	3222.6	0	12446	6	6	4	6	4	4	Carbamylation; Deamidation (NQ); Oxidation (M)	35870	Prostaglandin reductase 1 OS=Homo sapiens OX=9606 GN=PTGR1 PE=1 SV=2
493	841	P60903|S10AA_HUMAN	P60903	S10AA	HUMAN	109.2	55	28	55	55	45	6989	3045.9	6242.1	3664.1	4	4	10	8	11	8	Carbamidomethylation	11203	Protein S100-A10 OS=Homo sapiens OX=9606 GN=S100A10 PE=1 SV=2
953	594	Q4KMQ2|ANO6_HUMAN	Q4KMQ2	ANO6	HUMAN	109.01	9	3	5	2	1	3302.9	1313.4	0	630.06	7	7	3	3	2	1	Carbamidomethylation	106165	Anoctamin-6 OS=Homo sapiens OX=9606 GN=ANO6 PE=1 SV=2
726	848	O43657|TSN6_HUMAN	O43657	TSN6	HUMAN	108.87	20	16	15	5	9	10769	10283	436.1	0	5	5	6	6	3	2	Carbamidomethylation	27563	Tetraspanin-6 OS=Homo sapiens OX=9606 GN=TSPAN6 PE=1 SV=1
639	750	Q8IX19|MCEM1_HUMAN	Q8IX19	MCEM1	HUMAN	108.52	28	16	19	16	25	9292	10645	5175	6297.8	5	5	5	7	4	6	Carbamylation; Deamidation (NQ); Oxidation (M); Acetylation (Protein N-term)	21229	Mast cell-expressed membrane protein 1 OS=Homo sapiens OX=9606 GN=MCEMP1 PE=1 SV=1
774	1934	A0A0C4DH72|KV106_HUMAN	A0A0C4DH72	KV106	HUMAN	108.35	26	26	24	10	10	4958.6	2194.7	1546.6	820.17	3	3	7	6	1	1	Carbamylation; Acetylation (Protein N-term)	12697	Immunoglobulin kappa variable 1-6 OS=Homo sapiens OX=9606 GN=IGKV1-6 PE=3 SV=1
846	850	Q9UN36|NDRG2_HUMAN	Q9UN36	NDRG2	HUMAN	108.14	17	3	6	14	7	0	482.49	2266.9	16976	4	4	1	2	6	3	Acetylation (Protein N-term)	40798	Protein NDRG2 OS=Homo sapiens OX=9606 GN=NDRG2 PE=1 SV=2
696	662	P08572|CO4A2_HUMAN	P08572	CO4A2	HUMAN	108.14	4	4	2	0	0	1221.9	3252.1			5	5	9	9	0	0	Carbamidomethylation; Deamidation (NQ)	167553	Collagen alpha-2(IV) chain OS=Homo sapiens OX=9606 GN=COL4A2 PE=1 SV=4
883	779	P06576|ATPB_HUMAN	P06576	ATPB	HUMAN	108.12	12	12	5	2	2	1863.8	380.74	544.55	384.08	4	4	6	3	1	1		56560	ATP synthase subunit beta mitochondrial OS=Homo sapiens OX=9606 GN=ATP5F1B PE=1 SV=3
668	624	O75351|VPS4B_HUMAN	O75351	VPS4B	HUMAN	108.07	14	8	14	12	9	1000.9	3632.3	24953	1611	5	4	3	8	4	5	Carbamidomethylation	49302	Vacuolar protein sorting-associated protein 4B OS=Homo sapiens OX=9606 GN=VPS4B PE=1 SV=2
631	1051	A0A075B6R9|KVD24_HUMAN	A0A075B6R9	KVD24	HUMAN	107.9	24	24	24	17	17	3314.1	1411.4			3	1	5	7	4	6	Carbamylation; Deamidation (NQ)	13079	Probable non-functional immunoglobulin kappa variable 2D-24 OS=Homo sapiens OX=9606 GN=IGKV2D-24 PE=1 SV=1
785	553	Q13217|DNJC3_HUMAN	Q13217	DNJC3	HUMAN	107.81	15	6	6	5	7	3379	2301.5	1045	1973.2	7	7	4	3	3	4	Carbamidomethylation	57580	DnaJ homolog subfamily C member 3 OS=Homo sapiens OX=9606 GN=DNAJC3 PE=1 SV=1
641	831	Q9BV40|VAMP8_HUMAN	Q9BV40	VAMP8	HUMAN	107.76	55	36	43	26	47	10555	6237.2	1897.7	2778.5	6	6	5	7	3	7	Acetylation (Protein N-term)	11438	Vesicle-associated membrane protein 8 OS=Homo sapiens OX=9606 GN=VAMP8 PE=1 SV=1
749	489	Q13418|ILK_HUMAN	Q13418	ILK	HUMAN	107.73	16	10	9	2	7	2774	1830	648.53	1038	7	7	6	4	3	3	Carbamidomethylation; Acetylation (Protein N-term)	51419	Integrin-linked protein kinase OS=Homo sapiens OX=9606 GN=ILK PE=1 SV=2
717	655	P35222|CTNB1_HUMAN	P35222	CTNB1	HUMAN	107.64	6	5	2	5	5	1763.2	0	0	514.77	5	3	5	2	5	5	Carbamidomethylation	85497	Catenin beta-1 OS=Homo sapiens OX=9606 GN=CTNNB1 PE=1 SV=1
459	985	P0DP01|HV108_HUMAN	P0DP01	HV108	HUMAN	107.52	32	22	32	22	22	1347.4	0	671.78	570.94	3	1	12	17	8	6	Carbamidomethylation; Carbamylation; Deamidation (NQ)	12992	Immunoglobulin heavy variable 1-8 OS=Homo sapiens OX=9606 GN=IGHV1-8 PE=3 SV=1
763	735	Q9H2K8|TAOK3_HUMAN	Q9H2K8	TAOK3	HUMAN	107.51	6	6	4	4	2	3495.8	2388.3	408.28	494.6	5	5	5	5	3	2	Carbamidomethylation	105406	Serine/threonine-protein kinase TAO3 OS=Homo sapiens OX=9606 GN=TAOK3 PE=1 SV=2
921	1096	P19957|ELAF_HUMAN	P19957	ELAF	HUMAN	107.26	30	22	29	22	0	7566.7	2175.2	285.19		4	4	4	4	2	0	Carbamidomethylation; Oxidation (M)	12270	Elafin OS=Homo sapiens OX=9606 GN=PI3 PE=1 SV=3
620	880	P30043|BLVRB_HUMAN	P30043	BLVRB	HUMAN	107.09	19	19	12	15	12	8393.4	2525.3	4026.2	2565.4	4	4	8	3	8	4	Deamidation (NQ)	22119	Flavin reductase (NADPH) OS=Homo sapiens OX=9606 GN=BLVRB PE=1 SV=3
678	815	Q15782|CH3L2_HUMAN	Q15782	CH3L2	HUMAN	107.06	12	8	12	12	12	3847.1	8358.7	2761.7	2647.8	4	4	3	5	6	6	Carbamidomethylation; Deamidation (NQ)	43501	Chitinase-3-like protein 2 OS=Homo sapiens OX=9606 GN=CHI3L2 PE=1 SV=1
597	766	P20339|RAB5A_HUMAN	P20339	RAB5A	HUMAN	106.88	21	21	15	10	10	787.64				4	1	6	7	7	5	Carbamylation	23659	Ras-related protein Rab-5A OS=Homo sapiens OX=9606 GN=RAB5A PE=1 SV=2
619	1053	A0A0C4DH68|KV224_HUMAN	A0A0C4DH68	KV224	HUMAN	106.71	24	24	24	17	17	2622.9	1123			3	1	6	7	4	6	Deamidation (NQ)	13079	Immunoglobulin kappa variable 2-24 OS=Homo sapiens OX=9606 GN=IGKV2-24 PE=3 SV=1
869	957	P35998|PRS7_HUMAN	P35998	PRS7	HUMAN	106.63	8	8	6	8	6	2747.6	572.4	680.91	1472.4	3	3	3	2	3	3	Carbamidomethylation	48634	26S proteasome regulatory subunit 7 OS=Homo sapiens OX=9606 GN=PSMC2 PE=1 SV=3
936	923	P07357|CO8A_HUMAN	P07357	CO8A	HUMAN	106.38	8	8	8	3	3	2079.5	2609.9	672.27	529.51	3	3	3	3	2	1	Carbamidomethylation	65163	Complement component C8 alpha chain OS=Homo sapiens OX=9606 GN=C8A PE=1 SV=2
740	899	P46777|RL5_HUMAN	P46777	RL5	HUMAN	106.28	12	9	5	12	9	2232.6	827.24	3329.5	2709	3	3	2	1	7	6		34363	60S ribosomal protein L5 OS=Homo sapiens OX=9606 GN=RPL5 PE=1 SV=3
567	825	P62745|RHOB_HUMAN	P62745	RHOB	HUMAN	106.1	25	19	13	19	19	684.4		0	622.21	4	2	4	5	8	11	Carbamidomethylation	22123	Rho-related GTP-binding protein RhoB OS=Homo sapiens OX=9606 GN=RHOB PE=1 SV=1
694	876	P59768|GBG2_HUMAN	P59768	GBG2	HUMAN	105.88	69	69	69	49	39	6073.7	9750.4	11122	5438.4	4	4	6	5	5	3	Carbamidomethylation; Deamidation (NQ); Acetylation (Protein N-term)	7850	Guanine nucleotide-binding protein G(I)/G(S)/G(O) subunit gamma-2 OS=Homo sapiens OX=9606 GN=GNG2 PE=1 SV=2
440	995	P01743|HV146_HUMAN	P01743	HV146	HUMAN	105.74	32	22	32	22	22	2029.8	1541.3	1071.3	606.27	3	1	15	17	8	6	Carbamidomethylation; Carbamylation	12933	Immunoglobulin heavy variable 1-46 OS=Homo sapiens OX=9606 GN=IGHV1-46 PE=1 SV=2
899	901	P25398|RS12_HUMAN	P25398	RS12	HUMAN	105.71	39	31	17	25	32	858.31	409.89	1203.4	2398.2	4	4	3	1	3	4	Carbamidomethylation; Acetylation (Protein N-term)	14515	40S ribosomal protein S12 OS=Homo sapiens OX=9606 GN=RPS12 PE=1 SV=3
715	668	Q93033|IGSF2_HUMAN	Q93033	IGSF2	HUMAN	105.7	6	5	3	2	2	3283.7	1155.9	1365.4	892.46	6	6	8	4	3	2		115108	Immunoglobulin superfamily member 2 OS=Homo sapiens OX=9606 GN=CD101 PE=1 SV=2
672	835	Q8N5I2|ARRD1_HUMAN	Q8N5I2	ARRD1	HUMAN	105.65	10	8	10	8	10	4120.8	7721.3	1216.7	3647.7	4	4	6	6	3	5	Carbamidomethylation	45981	Arrestin domain-containing protein 1 OS=Homo sapiens OX=9606 GN=ARRDC1 PE=1 SV=1
685	633	Q9Y2J8|PADI2_HUMAN	Q9Y2J8	PADI2	HUMAN	105.4	9	8	6	3	3	3816.4	2372	0	2365	6	6	10	4	2	3	Carbamidomethylation	75564	Protein-arginine deiminase type-2 OS=Homo sapiens OX=9606 GN=PADI2 PE=1 SV=2
824	796	O15400|STX7_HUMAN	O15400	STX7	HUMAN	105.22	18	13	18	10	10	6169.5	3822	3073.6	1908.8	4	4	3	5	2	3	Carbamidomethylation	29816	Syntaxin-7 OS=Homo sapiens OX=9606 GN=STX7 PE=1 SV=4
917	654	Q13938|CAYP1_HUMAN	Q13938	CAYP1	HUMAN	105.17	25	25	11	0	0	3514.5	2941.4			6	6	6	4	0	0	Carbamidomethylation; Deamidation (NQ)	30240	Calcyphosin OS=Homo sapiens OX=9606 GN=CAPS PE=1 SV=2
771	820	P10768|ESTD_HUMAN	P10768	ESTD	HUMAN	104.98	21	16	14	7	9	3674.7	1704.5	726.35	1188.2	5	5	5	5	2	3	Carbamidomethylation; Deamidation (NQ)	31463	S-formylglutathione hydrolase OS=Homo sapiens OX=9606 GN=ESD PE=1 SV=2
850	721	P35237|SPB6_HUMAN	P35237	SPB6	HUMAN	104.76	14	9	9	7	6	1092	2284.7	811.7	1021.7	5	4	3	4	3	2	Carbamidomethylation; Acetylation (Protein N-term)	42622	Serpin B6 OS=Homo sapiens OX=9606 GN=SERPINB6 PE=1 SV=3
963	1036	P02792|FRIL_HUMAN	P02792	FRIL	HUMAN	104.62	23	10	23	0	0	1121.9	5228.3			4	4	3	6	0	0	Carbamylation	20020	Ferritin light chain OS=Homo sapiens OX=9606 GN=FTL PE=1 SV=2
714	568	P49327|FAS_HUMAN	P49327	FAS	HUMAN	104.6	4	1	1	2	2	1580.1	1106	1107.7	4421.2	10	10	3	2	5	7	Carbamidomethylation; Deamidation (NQ); Oxidation (M)	273424	Fatty acid synthase OS=Homo sapiens OX=9606 GN=FASN PE=1 SV=3
686	625	P80303|NUCB2_HUMAN	P80303	NUCB2	HUMAN	104.4	21	7	7	14	10	741.49	1523.1	3883.5	1234.3	6	5	5	4	5	5	Deamidation (NQ); Oxidation (M); Acetylation (Protein N-term)	50223	Nucleobindin-2 OS=Homo sapiens OX=9606 GN=NUCB2 PE=1 SV=3
1195	756	Q9UKS6|PACN3_HUMAN	Q9UKS6	PACN3	HUMAN	104.3	14	7	7	0	3	0	1620.4		905.15	4	4	2	2	0	1	Carbamidomethylation	48487	Protein kinase C and casein kinase substrate in neurons protein 3 OS=Homo sapiens OX=9606 GN=PACSIN3 PE=1 SV=2
263	911	Q7Z3Y8|K1C27_HUMAN	Q7Z3Y8	K1C27	HUMAN	104.13	7	4	4	7	4			687.06		3	1	10	13	40	33	Carbamylation; Deamidation (NQ); Oxidation (M); Acetylation (Protein N-term)	49822	Keratin type I cytoskeletal 27 OS=Homo sapiens OX=9606 GN=KRT27 PE=1 SV=2
867	682	Q92817|EVPL_HUMAN	Q92817	EVPL	HUMAN	104.1	5	0	0	3	2	0		2403.4	1526.5	9	9	1	0	6	4		231602	Envoplakin OS=Homo sapiens OX=9606 GN=EVPL PE=1 SV=3
747	636	P54920|SNAA_HUMAN	P54920	SNAA	HUMAN	104.05	26	13	13	13	13	1274.5	1925.1	1765.9	1002	6	6	5	6	3	3	Carbamidomethylation; Carbamylation; Oxidation (M)	33233	Alpha-soluble NSF attachment protein OS=Homo sapiens OX=9606 GN=NAPA PE=1 SV=3
1108	844	Q07955|SRSF1_HUMAN	Q07955	SRSF1	HUMAN	103.87	17	13	13	0	0	2900.5	3335.8			4	4	3	3	0	0	Carbamidomethylation	27745	Serine/arginine-rich splicing factor 1 OS=Homo sapiens OX=9606 GN=SRSF1 PE=1 SV=2
898	987	Q2I0M4|LRC26_HUMAN	Q2I0M4	LRC26	HUMAN	103.74	12	6	4	10	12	1507.9	838.95	1534.8	1614.2	3	3	3	2	2	4	Carbamylation	34857	Leucine-rich repeat-containing protein 26 OS=Homo sapiens OX=9606 GN=LRRC26 PE=1 SV=2
1017	734	P07738|PMGE_HUMAN	P07738	PMGE	HUMAN	103.72	22	22	3	0	0	2084.7	868.39			5	5	7	1	0	0	Carbamidomethylation	30005	Bisphosphoglycerate mutase OS=Homo sapiens OX=9606 GN=BPGM PE=1 SV=2
463	983	A0A0C4DH29|HV103_HUMAN	A0A0C4DH29	HV103	HUMAN	103.66	32	22	32	9	9	258.46	0			3	1	13	17	7	5	Carbamidomethylation; Carbamylation	13008	Immunoglobulin heavy variable 1-3 OS=Homo sapiens OX=9606 GN=IGHV1-3 PE=3 SV=1
739	699	O60506|HNRPQ_HUMAN	O60506	HNRPQ	HUMAN	103.62	8	5	3	5	5	1420.1	0	1270.4	1136	5	5	4	3	4	5		69603	Heterogeneous nuclear ribonucleoprotein Q OS=Homo sapiens OX=9606 GN=SYNCRIP PE=1 SV=2
924	979	Q96FW1|OTUB1_HUMAN	Q96FW1	OTUB1	HUMAN	103.61	12	0	8	12	4		1188.1	684.87	0	3	3	0	3	6	1	Carbamidomethylation	31284	Ubiquitin thioesterase OTUB1 OS=Homo sapiens OX=9606 GN=OTUB1 PE=1 SV=2
1193	934	P78325|ADAM8_HUMAN	P78325	ADAM8	HUMAN	103.45	6	6	0	2	2	1458.2		355.43	367.11	3	3	3	0	1	1	Carbamidomethylation	88771	Disintegrin and metalloproteinase domain-containing protein 8 OS=Homo sapiens OX=9606 GN=ADAM8 PE=1 SV=2
813	648	Q99832|TCPH_HUMAN	Q99832	TCPH	HUMAN	103.37	13	7	7	3	5	2817.4	2298.2	2435.8	4235	7	7	4	4	2	3	Carbamidomethylation	59367	T-complex protein 1 subunit eta OS=Homo sapiens OX=9606 GN=CCT7 PE=1 SV=2
634	3129	P13164|IFM1_HUMAN	P13164	IFM1	HUMAN	103.33	14	14	14	13	13	7602.6	5961.4	2729.9	2810.8	2	2	7	8	3	4	Oxidation (M)	13964	Interferon-induced transmembrane protein 1 OS=Homo sapiens OX=9606 GN=IFITM1 PE=1 SV=3
634	3558	Q01629|IFM2_HUMAN	Q01629	IFM2	HUMAN	103.33	13	13	13	12	12	7602.6	5961.4	2729.9	2810.8	2	2	7	8	3	4	Oxidation (M)	14632	Interferon-induced transmembrane protein 2 OS=Homo sapiens OX=9606 GN=IFITM2 PE=1 SV=2
634	3559	Q01628|IFM3_HUMAN	Q01628	IFM3	HUMAN	103.33	13	13	13	12	12	7602.6	5961.4	2729.9	2810.8	2	2	7	8	3	4	Oxidation (M)	14632	Interferon-induced transmembrane protein 3 OS=Homo sapiens OX=9606 GN=IFITM3 PE=1 SV=2
756	1336	O43914|TYOBP_HUMAN	O43914	TYOBP	HUMAN	103.24	27	27	27	27	27	2874.9	512.08	1874.6	1418.5	2	2	5	2	3	6		12179	TYRO protein tyrosine kinase-binding protein OS=Homo sapiens OX=9606 GN=TYROBP PE=1 SV=1
1180	1101	P15559|NQO1_HUMAN	P15559	NQO1	HUMAN	103.09	12	12	5	0	0	2524.4	808.34			3	3	4	1	0	0		30868	NAD(P)H dehydrogenase [quinone] 1 OS=Homo sapiens OX=9606 GN=NQO1 PE=1 SV=1
468	1019	P01742|HV169_HUMAN	P01742	HV169	HUMAN	102.52	36	36	9	9	9	14511				4	3	14	15	7	5	Carbamidomethylation; Carbamylation	12659	Immunoglobulin heavy variable 1-69 OS=Homo sapiens OX=9606 GN=IGHV1-69 PE=1 SV=2
1054	980	P08263|GSTA1_HUMAN	P08263	GSTA1	HUMAN	102.28	16	16	9	0	0	3908.2	2829.4			4	2	4	3	0	0		25631	Glutathione S-transferase A1 OS=Homo sapiens OX=9606 GN=GSTA1 PE=1 SV=3
1054	986	P09210|GSTA2_HUMAN	P09210	GSTA2	HUMAN	102.28	16	16	9	0	0	3908.2	2829.4			4	2	4	3	0	0		25664	Glutathione S-transferase A2 OS=Homo sapiens OX=9606 GN=GSTA2 PE=1 SV=4
895	744	O60234|GMFG_HUMAN	O60234	GMFG	HUMAN	102.13	39	11	25	25	25	0	4173.5	3436.6	2566.3	5	5	1	3	4	3	Carbamidomethylation; Acetylation (Protein N-term)	16801	Glia maturation factor gamma OS=Homo sapiens OX=9606 GN=GMFG PE=1 SV=1
661	1736	O43653|PSCA_HUMAN	O43653	PSCA	HUMAN	102.12	25	25	25	16	25	16795	12730	635.5	893.78	3	3	11	5	1	4	Carbamidomethylation; Carbamylation; Deamidation (NQ)	11959	Prostate stem cell antigen OS=Homo sapiens OX=9606 GN=PSCA PE=1 SV=2
560	1949	P01709|LV208_HUMAN	P01709	LV208	HUMAN	101.99	18	14	18	18	14	13324	14791	5942.3	4712.8	3	1	12	7	5	5	Carbamylation	12382	Immunoglobulin lambda variable 2-8 OS=Homo sapiens OX=9606 GN=IGLV2-8 PE=1 SV=2
701	886	Q9NV96|CC50A_HUMAN	Q9NV96	CC50A	HUMAN	101.93	11	11	11	7	11	2265.7	2024.5	1350.9	1655.9	3	3	7	4	4	3	Carbamidomethylation; Deamidation (NQ)	40684	Cell cycle control protein 50A OS=Homo sapiens OX=9606 GN=TMEM30A PE=1 SV=1
794	910	P13693|TCTP_HUMAN	P13693	TCTP	HUMAN	101.91	24	24	12	12	12	1688.3	1341	0	539.97	4	4	5	2	2	6		19595	Translationally-controlled tumor protein OS=Homo sapiens OX=9606 GN=TPT1 PE=1 SV=1
786	642	Q8IZP0|ABI1_HUMAN	Q8IZP0	ABI1	HUMAN	101.9	17	7	8	8	5	728.42	1104.4	1271	1303.5	7	7	3	5	4	2	Carbamidomethylation; Acetylation (Protein N-term)	55081	Abl interactor 1 OS=Homo sapiens OX=9606 GN=ABI1 PE=1 SV=4
809	808	P33241|LSP1_HUMAN	P33241	LSP1	HUMAN	101.76	18	7	6	8	12	3486.2	1815.3	0	0	5	5	8	2	1	2		37192	Lymphocyte-specific protein 1 OS=Homo sapiens OX=9606 GN=LSP1 PE=1 SV=1
748	793	P46459|NSF_HUMAN	P46459	NSF	HUMAN	101.57	9	7	3	3	1	3096.2	719.97	676.3	449.19	6	6	7	3	5	1	Carbamidomethylation	82594	Vesicle-fusing ATPase OS=Homo sapiens OX=9606 GN=NSF PE=1 SV=3
552	1062	P55064|AQP5_HUMAN	P55064	AQP5	HUMAN	101.46	12	12	12	12	12	31889	20560	12622	11602	3	3	10	9	5	6	Oxidation (M)	28292	Aquaporin-5 OS=Homo sapiens OX=9606 GN=AQP5 PE=1 SV=1
933	577	P14868|SYDC_HUMAN	P14868	SYDC	HUMAN	101.37	13	13	3	0	3	1792.5	0		295.68	6	6	7	1	0	1		57136	Aspartate--tRNA ligase cytoplasmic OS=Homo sapiens OX=9606 GN=DARS1 PE=1 SV=2
943	767	P05556|ITB1_HUMAN	P05556	ITB1	HUMAN	101.34	8	7	3	0	3	1616.8	1643.7		0	5	5	5	2	0	2	Carbamidomethylation	88415	Integrin beta-1 OS=Homo sapiens OX=9606 GN=ITGB1 PE=1 SV=2
671	586	P16870|CBPE_HUMAN	P16870	CBPE	HUMAN	101.26	15	9	9	8	7	2622.1	1392.7	3812.2	752.77	6	6	4	8	4	4	Carbamidomethylation	53151	Carboxypeptidase E OS=Homo sapiens OX=9606 GN=CPE PE=1 SV=1
1099	996	Q96PD5|PGRP2_HUMAN	Q96PD5	PGRP2	HUMAN	101.08	7	7	3	1	2	2529.5	176.21	5815	679.03	3	3	3	1	1	1	Carbamidomethylation	62217	N-acetylmuramoyl-L-alanine amidase OS=Homo sapiens OX=9606 GN=PGLYRP2 PE=1 SV=1
811	860	Q07020|RL18_HUMAN	Q07020	RL18	HUMAN	100.95	20	20	20	20	13	2025.6	693.04	1558.9	800.34	3	3	4	3	4	2	Carbamidomethylation	21634	60S ribosomal protein L18 OS=Homo sapiens OX=9606 GN=RPL18 PE=1 SV=2
710	1735	P01706|LV211_HUMAN	P01706	LV211	HUMAN	100.8	18	13	18	18	13	7437.7	6896.9	2606.2	1900.4	3	1	5	5	5	3	Carbamylation	12644	Immunoglobulin lambda variable 2-11 OS=Homo sapiens OX=9606 GN=IGLV2-11 PE=1 SV=2
865	968	P53621|COPA_HUMAN	P53621	COPA	HUMAN	100.76	4	1	4	2	2	721.8	1297.3	1794.1	28256	5	5	1	4	4	2	Carbamidomethylation; Deamidation (NQ)	138345	Coatomer subunit alpha OS=Homo sapiens OX=9606 GN=COPA PE=1 SV=2
1026	940	Q86YZ3|HORN_HUMAN	Q86YZ3	HORN	HUMAN	100.69	2	0	1	1	1		0	2763.6	3742.7	3	3	0	1	4	2		282389	Hornerin OS=Homo sapiens OX=9606 GN=HRNR PE=1 SV=2
807	532	P05771|KPCB_HUMAN	P05771	KPCB	HUMAN	100.56	14	7	1	4	5	2185.9	0	467.81	465.5	8	8	6	1	3	3	Carbamidomethylation; Acetylation (Protein N-term)	76869	Protein kinase C beta type OS=Homo sapiens OX=9606 GN=PRKCB PE=1 SV=4
866	592	Q00839|HNRPU_HUMAN	Q00839	HNRPU	HUMAN	100.52	9	5	1	4	4	3457	0	385.71	2106.2	6	6	4	1	3	3	Deamidation (NQ)	90585	Heterogeneous nuclear ribonucleoprotein U OS=Homo sapiens OX=9606 GN=HNRNPU PE=1 SV=6
690	1069	A0A0C4DH34|HV428_HUMAN	A0A0C4DH34	HV428	HUMAN	100.36	28	28	9	8	8	23683	2881.8	10653	9065.5	4	4	11	5	2	1	Carbamidomethylation; Oxidation (M)	13124	Immunoglobulin heavy variable 4-28 OS=Homo sapiens OX=9606 GN=IGHV4-28 PE=3 SV=1
908	629	Q6IA69|NADE_HUMAN	Q6IA69	NADE	HUMAN	100.36	9	4	6	0	1	973.04	1889.9		688.26	6	6	3	6	0	1	Carbamidomethylation; Deamidation (NQ)	79285	Glutamine-dependent NAD(+) synthetase OS=Homo sapiens OX=9606 GN=NADSYN1 PE=1 SV=3
364	877	Q2M2I5|K1C24_HUMAN	Q2M2I5	K1C24	HUMAN	100.32	7	3	3	5	5			0	0	4	2	8	10	25	18	Carbamylation; Deamidation (NQ)	55087	Keratin type I cytoskeletal 24 OS=Homo sapiens OX=9606 GN=KRT24 PE=1 SV=1
603	593	P05546|HEP2_HUMAN	P05546	HEP2	HUMAN	100.26	10	7	5	10	6	4108	817.89	5163.2	2576.9	6	6	7	4	7	7	Carbamidomethylation	57071	Heparin cofactor 2 OS=Homo sapiens OX=9606 GN=SERPIND1 PE=1 SV=3
798	770	Q13630|FCL_HUMAN	Q13630	FCL	HUMAN	100.23	17	15	8	7	7	1382.6	1413.4	1583.3	1430.2	5	5	5	4	2	3		35893	GDP-L-fucose synthase OS=Homo sapiens OX=9606 GN=GFUS PE=1 SV=1
985	765	O14818|PSA7_HUMAN	O14818	PSA7	HUMAN	100.18	25	14	12	4	0	1662.4	1025.8	588.29		5	5	4	3	1	0		27887	Proteasome subunit alpha type-7 OS=Homo sapiens OX=9606 GN=PSMA7 PE=1 SV=1
902	738	O95171|SCEL_HUMAN	O95171	SCEL	HUMAN	100.16	9	4	2	6	5	1751.7	0	352.4	2401.7	5	5	3	1	3	3		77552	Sciellin OS=Homo sapiens OX=9606 GN=SCEL PE=1 SV=2
919	870	Q14103|HNRPD_HUMAN	Q14103	HNRPD	HUMAN	100.04	12	12	3	7	3	3556	0	1101.7	1582.1	4	4	5	1	2	2	Carbamidomethylation	38434	Heterogeneous nuclear ribonucleoprotein D0 OS=Homo sapiens OX=9606 GN=HNRNPD PE=1 SV=1
1052	908	A8MQ03|CRTP1_HUMAN	A8MQ03	CRTP1	HUMAN	100.01	41	25	24	28	0	2434.4	0	796.81		4	4	2	3	2	0	Acetylation (Protein N-term)	15313	Cysteine-rich tail protein 1 OS=Homo sapiens OX=9606 GN=CYSRT1 PE=1 SV=1
745	724	P00915|CAH1_HUMAN	P00915	CAH1	HUMAN	99.93	22	22	15	7	3	5374.9	5756.9	1472.7	767.54	5	5	7	6	2	1	Acetylation (Protein N-term)	28870	Carbonic anhydrase 1 OS=Homo sapiens OX=9606 GN=CA1 PE=1 SV=2
876	641	P05120|PAI2_HUMAN	P05120	PAI2	HUMAN	99.55	18	13	6	2	2	4155.6	3597.1	0	1034.7	6	6	5	3	1	2		46596	Plasminogen activator inhibitor 2 OS=Homo sapiens OX=9606 GN=SERPINB2 PE=1 SV=2
827	781	O60784|TOM1_HUMAN	O60784	TOM1	HUMAN	99.33	13	11	8	5	5	2032.9	1353.6	575.07	1174	4	4	5	4	2	2	Acetylation (Protein N-term)	53818	Target of Myb protein 1 OS=Homo sapiens OX=9606 GN=TOM1 PE=1 SV=2
872	772	O95782|AP2A1_HUMAN	O95782	AP2A1	HUMAN	99.31	4	3	3	1	2	2401.1	1311.1	807.25	1997.1	4	4	4	3	1	3		107546	AP-2 complex subunit alpha-1 OS=Homo sapiens OX=9606 GN=AP2A1 PE=1 SV=3
790	687	Q9UJU6|DBNL_HUMAN	Q9UJU6	DBNL	HUMAN	99.27	14	12	10	7	9	1035.4	2933.2	1429.9	1191.6	5	5	5	4	2	3	Carbamidomethylation; Deamidation (NQ)	48207	Drebrin-like protein OS=Homo sapiens OX=9606 GN=DBNL PE=1 SV=1
961	1677	A0A0C4DH67|KV108_HUMAN	A0A0C4DH67	KV108	HUMAN	99.26	27	27	27	13	13	2118.6	1093.1	891.79	0	2	2	3	4	1	1	Carbamylation	12537	Immunoglobulin kappa variable 1-8 OS=Homo sapiens OX=9606 GN=IGKV1-8 PE=3 SV=1
439	3159	P01701|LV151_HUMAN	P01701	LV151	HUMAN	99.18	14	14	14	14	14	27493	16599	15457	9208.5	3	3	12	12	13	9	Deamidation (NQ)	12249	Immunoglobulin lambda variable 1-51 OS=Homo sapiens OX=9606 GN=IGLV1-51 PE=1 SV=2
578	1117	Q6DRA6|H2B2D_HUMAN	Q6DRA6	H2B2D	HUMAN	98.76	20	6	15	10	10		3546.9			4	1	8	7	6	6	Carbamylation; Oxidation (M)	18018	Putative histone H2B type 2-D OS=Homo sapiens OX=9606 GN=H2BC19P PE=5 SV=3
578	1120	Q6DN03|H2B2C_HUMAN	Q6DN03	H2B2C	HUMAN	98.76	17	5	13	9	9		3546.9			4	1	8	7	6	6	Carbamylation; Oxidation (M)	21472	Putative histone H2B type 2-C OS=Homo sapiens OX=9606 GN=H2BC20P PE=5 SV=3
1165	1345	Q96RF0|SNX18_HUMAN	Q96RF0	SNX18	HUMAN	98.63	4	2	2	3	3	0	862.17	0	527.77	2	2	1	2	1	1		68895	Sorting nexin-18 OS=Homo sapiens OX=9606 GN=SNX18 PE=1 SV=2
987	1187	Q9Y336|SIGL9_HUMAN	Q9Y336	SIGL9	HUMAN	98.6	7	7	7	4	7	1572	680.39	550.79	801.84	2	2	3	2	1	2	Carbamidomethylation	50082	Sialic acid-binding Ig-like lectin 9 OS=Homo sapiens OX=9606 GN=SIGLEC9 PE=1 SV=2
931	1082	P50991|TCPD_HUMAN	P50991	TCPD	HUMAN	97.92	5	4	4	4	0	1669.8	1597.4	0		3	3	3	4	2	0		57924	T-complex protein 1 subunit delta OS=Homo sapiens OX=9606 GN=CCT4 PE=1 SV=4
814	701	P27169|PON1_HUMAN	P27169	PON1	HUMAN	97.89	20	14	14	8	6	2011.5	3370.9	0	0	5	5	4	6	2	1	Carbamidomethylation	39731	Serum paraoxonase/arylesterase 1 OS=Homo sapiens OX=9606 GN=PON1 PE=1 SV=3
777	875	Q9H0E2|TOLIP_HUMAN	Q9H0E2	TOLIP	HUMAN	97.79	19	14	9	3	14	1941.4	2128.9	0	1850.4	4	4	5	4	2	4	Deamidation (NQ)	30282	Toll-interacting protein OS=Homo sapiens OX=9606 GN=TOLLIP PE=1 SV=1
957	888	Q7Z4W1|DCXR_HUMAN	Q7Z4W1	DCXR	HUMAN	97.68	17	5	3	14	9	0	400.91	976.57	1895.1	4	4	2	1	3	3	Carbamidomethylation	25913	L-xylulose reductase OS=Homo sapiens OX=9606 GN=DCXR PE=1 SV=2
852	1103	P10809|CH60_HUMAN	P10809	CH60	HUMAN	97.6	14	14	4	0	0	2327	680.55			3	3	6	6	0	0		61055	60 kDa heat shock protein mitochondrial OS=Homo sapiens OX=9606 GN=HSPD1 PE=1 SV=2
482	993	A0A0C4DH36|HV338_HUMAN	A0A0C4DH36	HV338	HUMAN	97.55	25	25	25	16	25	5358.2	7064.2	853.36	6603.6	3	2	12	14	7	6	Carbamidomethylation; Carbamylation; Deamidation (NQ); Acetylation (Protein N-term)	12759	Probable non-functional immunoglobulin heavy variable 3-38 OS=Homo sapiens OX=9606 GN=IGHV3-38 PE=1 SV=1
966	906	P35754|GLRX1_HUMAN	P35754	GLRX1	HUMAN	97.52	45	10	10	38	25	1072.8	909.91	2133.8	3681.8	4	4	1	1	4	3	Carbamidomethylation; Acetylation (Protein N-term)	11776	Glutaredoxin-1 OS=Homo sapiens OX=9606 GN=GLRX PE=1 SV=2
708	646	Q06323|PSME1_HUMAN	Q06323	PSME1	HUMAN	97.51	29	22	25	12	8	3062.5	4399.3	1413.6	778.81	7	7	5	7	4	2	Carbamidomethylation	28723	Proteasome activator complex subunit 1 OS=Homo sapiens OX=9606 GN=PSME1 PE=1 SV=1
842	706	P19827|ITIH1_HUMAN	P19827	ITIH1	HUMAN	97.5	7	6	6	1	5	3471.2	849.84	0	1485.8	5	5	4	4	1	3	Deamidation (NQ)	101389	Inter-alpha-trypsin inhibitor heavy chain H1 OS=Homo sapiens OX=9606 GN=ITIH1 PE=1 SV=3
700	598	P15104|GLNA_HUMAN	P15104	GLNA	HUMAN	97.4	16	14	14	5	12	8281.3	7979.3	4862.5	6587.7	6	6	7	5	2	4	Carbamidomethylation; Acetylation (Protein N-term)	42064	Glutamine synthetase OS=Homo sapiens OX=9606 GN=GLUL PE=1 SV=4
817	787	Q9NVJ2|ARL8B_HUMAN	Q9NVJ2	ARL8B	HUMAN	97.19	29	5	10	19	15	1428	2035.2	0		5	1	3	2	4	4	Carbamidomethylation	21539	ADP-ribosylation factor-like protein 8B OS=Homo sapiens OX=9606 GN=ARL8B PE=1 SV=1
720	748	O43278|SPIT1_HUMAN	O43278	SPIT1	HUMAN	97.16	9	8	6	6	4	2775.2	1606	572.6	1393.8	5	5	6	3	5	3	Carbamidomethylation	58398	Kunitz-type protease inhibitor 1 OS=Homo sapiens OX=9606 GN=SPINT1 PE=1 SV=2
697	903	P20702|ITAX_HUMAN	P20702	ITAX	HUMAN	97.15	3	3	2	2	1	939.4	496.7	0		4	3	7	5	3	3	Carbamidomethylation; Deamidation (NQ)	127829	Integrin alpha-X OS=Homo sapiens OX=9606 GN=ITGAX PE=1 SV=3
945	818	O60664|PLIN3_HUMAN	O60664	PLIN3	HUMAN	97.06	12	4	4	11	4	379.25	577.15	1740	673.3	4	4	2	2	3	2	Deamidation (NQ)	47075	Perilipin-3 OS=Homo sapiens OX=9606 GN=PLIN3 PE=1 SV=3
841	909	O15393|TMPS2_HUMAN	O15393	TMPS2	HUMAN	96.88	9	9	5	5	5	4315.6	3396.5	917.33	1028.5	3	3	5	2	3	2	Carbamidomethylation; Deamidation (NQ)	53859	Transmembrane protease serine 2 OS=Homo sapiens OX=9606 GN=TMPRSS2 PE=1 SV=3
802	1014	P05161|ISG15_HUMAN	P05161	ISG15	HUMAN	96.73	19	19	19	13	13	5169	4387.9	1900.9	1076.5	3	3	3	5	3	3		17888	Ubiquitin-like protein ISG15 OS=Homo sapiens OX=9606 GN=ISG15 PE=1 SV=5
988	847	O43865|SAHH2_HUMAN	O43865	SAHH2	HUMAN	96.43	11	8	2	2	3	793.87	717.47		604.36	5	4	4	2	1	1	Carbamidomethylation	58952	S-adenosylhomocysteine hydrolase-like protein 1 OS=Homo sapiens OX=9606 GN=AHCYL1 PE=1 SV=2
843	773	P30626|SORCN_HUMAN	P30626	SORCN	HUMAN	96.38	25	19	11	6	11	3638.4	1599.3	1012.1	0	5	5	6	4	1	2	Deamidation (NQ)	21676	Sorcin OS=Homo sapiens OX=9606 GN=SRI PE=1 SV=1
845	799	P51572|BAP31_HUMAN	P51572	BAP31	HUMAN	96.22	17	4	13	17	4	0	320.46	4003.6	1033.7	4	4	2	4	5	1	Oxidation (M)	27992	B-cell receptor-associated protein 31 OS=Homo sapiens OX=9606 GN=BCAP31 PE=1 SV=3
951	954	P29966|MARCS_HUMAN	P29966	MARCS	HUMAN	96.17	10	8	7	5	7	0	0	471.98	424.99	3	3	3	3	1	2		31555	Myristoylated alanine-rich C-kinase substrate OS=Homo sapiens OX=9606 GN=MARCKS PE=1 SV=4
862	928	P17661|DESM_HUMAN	P17661	DESM	HUMAN	96.15	9	7	7	2	0	8859.7	0			5	1	5	5	1	0	Deamidation (NQ)	53536	Desmin OS=Homo sapiens OX=9606 GN=DES PE=1 SV=3
513	1109	P16520|GBB3_HUMAN	P16520	GBB3	HUMAN	96.06	12	5	12	5	5		0			3	1	8	10	7	10	Carbamidomethylation; Carbamylation	37221	Guanine nucleotide-binding protein G(I)/G(S)/G(T) subunit beta-3 OS=Homo sapiens OX=9606 GN=GNB3 PE=1 SV=1
1012	1218	P49006|MRP_HUMAN	P49006	MRP	HUMAN	95.8	14	14	14	14	14	1908.6	2341.8	1629.6	2052.8	2	2	2	2	2	2		19529	MARCKS-related protein OS=Homo sapiens OX=9606 GN=MARCKSL1 PE=1 SV=2
904	647	P25705|ATPA_HUMAN	P25705	ATPA	HUMAN	95.68	11	8	2	2	6	3013.8	835.34	583.11	1196.2	5	5	4	1	1	4		59751	ATP synthase subunit alpha mitochondrial OS=Homo sapiens OX=9606 GN=ATP5F1A PE=1 SV=1
1154	853	P19021|AMD_HUMAN	P19021	AMD	HUMAN	95.66	5	3	1	0	1	1333.3	374.72		11453	5	5	3	1	0	1	Carbamidomethylation; Deamidation (NQ)	108332	Peptidyl-glycine alpha-amidating monooxygenase OS=Homo sapiens OX=9606 GN=PAM PE=1 SV=2
752	651	P23396|RS3_HUMAN	P23396	RS3	HUMAN	95.49	30	20	12	21	9	1910.1	1458.5	2767.6	854.2	7	7	5	4	5	2	Carbamidomethylation	26688	40S ribosomal protein S3 OS=Homo sapiens OX=9606 GN=RPS3 PE=1 SV=2
847	973	P22894|MMP8_HUMAN	P22894	MMP8	HUMAN	95.41	12	6	7	10	3	1967.9	2635.3	1048.7	782.8	5	5	3	4	4	1	Carbamidomethylation	53412	Neutrophil collagenase OS=Homo sapiens OX=9606 GN=MMP8 PE=1 SV=1
727	913	P24071|FCAR_HUMAN	P24071	FCAR	HUMAN	95	19	10	10	8	19	10804	13008	5969.7	4124.5	4	4	4	5	4	4	Carbamidomethylation	32265	Immunoglobulin alpha Fc receptor OS=Homo sapiens OX=9606 GN=FCAR PE=1 SV=1
750	780	Q9NP79|VTA1_HUMAN	Q9NP79	VTA1	HUMAN	94.98	14	8	14	11	9	2341.7	3232.5	849	9565.1	4	4	3	5	4	4	Acetylation (Protein N-term)	33879	Vacuolar protein sorting-associated protein VTA1 homolog OS=Homo sapiens OX=9606 GN=VTA1 PE=1 SV=1
1003	763	P35606|COPB2_HUMAN	P35606	COPB2	HUMAN	94.82	5	1	2	3	2	0	1539.5	1479.5	1771.6	4	4	1	2	3	2	Carbamidomethylation	102487	Coatomer subunit beta' OS=Homo sapiens OX=9606 GN=COPB2 PE=1 SV=2
834	681	O43175|SERA_HUMAN	O43175	SERA	HUMAN	94.63	11	3	7	7	7	0	1286.6	1666.2	361.85	5	5	1	4	4	3	Deamidation (NQ)	56651	D-3-phosphoglycerate dehydrogenase OS=Homo sapiens OX=9606 GN=PHGDH PE=1 SV=4
1021	883	P17655|CAN2_HUMAN	P17655	CAN2	HUMAN	94.59	7	4	4	1	1	1323.2	3120.6	754.8	931.28	5	5	3	3	1	1	Carbamidomethylation	79995	Calpain-2 catalytic subunit OS=Homo sapiens OX=9606 GN=CAPN2 PE=1 SV=6
840	933	P61088|UBE2N_HUMAN	P61088	UBE2N	HUMAN	94.56	29	14	12	14	24	1291	1644.7	2347.9	1196.4	4	4	4	2	2	4		17138	Ubiquitin-conjugating enzyme E2 N OS=Homo sapiens OX=9606 GN=UBE2N PE=1 SV=1
796	774	P47755|CAZA2_HUMAN	P47755	CAZA2	HUMAN	94.45	16	11	9	11	3	1222.6	1154.6	389.25		5	2	5	4	3	2	Deamidation (NQ); Acetylation (Protein N-term)	32949	F-actin-capping protein subunit alpha-2 OS=Homo sapiens OX=9606 GN=CAPZA2 PE=1 SV=3
755	997	P06870|KLK1_HUMAN	P06870	KLK1	HUMAN	94.35	14	14	14	5	8	9566.7	6430.9	1857.9	1375.1	3	3	7	5	2	2	Carbamidomethylation	28890	Kallikrein-1 OS=Homo sapiens OX=9606 GN=KLK1 PE=1 SV=2
365	1158	P09471|GNAO_HUMAN	P09471	GNAO	HUMAN	94.23	11	6	6	6	11				0	3	1	15	10	18	18	Carbamylation	40051	Guanine nucleotide-binding protein G(o) subunit alpha OS=Homo sapiens OX=9606 GN=GNAO1 PE=1 SV=4
873	811	Q9P289|STK26_HUMAN	Q9P289	STK26	HUMAN	94.1	11	7	5	7	7	424.94	0	789.42	891.39	4	2	2	3	3	3	Carbamidomethylation	46529	Serine/threonine-protein kinase 26 OS=Homo sapiens OX=9606 GN=STK26 PE=1 SV=2
998	708	P10643|CO7_HUMAN	P10643	CO7	HUMAN	94.02	10	8	5	0	0	2006.6	2394.1			5	5	4	4	0	0	Carbamidomethylation; Oxidation (M)	93518	Complement component C7 OS=Homo sapiens OX=9606 GN=C7 PE=1 SV=2
1024	1945	P04155|TFF1_HUMAN	P04155	TFF1	HUMAN	93.86	32	32	30	30	11	2440.1	2126.2	2597.5	1657.4	3	3	2	2	3	1	Carbamidomethylation	9150	Trefoil factor 1 OS=Homo sapiens OX=9606 GN=TFF1 PE=1 SV=1
886	1083	P30273|FCERG_HUMAN	P30273	FCERG	HUMAN	93.76	41	34	30	30	23	8932.7	8232.3	7141	4822.6	4	4	3	2	4	2		9667	High affinity immunoglobulin epsilon receptor subunit gamma OS=Homo sapiens OX=9606 GN=FCER1G PE=1 SV=1
662	869	P21730|C5AR1_HUMAN	P21730	C5AR1	HUMAN	93.55	12	8	11	9	7	12089	9747	6102.9	5193.7	6	6	8	5	5	3	Carbamidomethylation; Oxidation (M)	39336	C5a anaphylatoxin chemotactic receptor 1 OS=Homo sapiens OX=9606 GN=C5AR1 PE=1 SV=2
533	1052	A0A075B6I9|LV746_HUMAN	A0A075B6I9	LV746	HUMAN	93.53	21	21	21	21	21	3116.7	0	2494.1	1896.5	3	1	9	5	7	11		12468	Immunoglobulin lambda variable 7-46 OS=Homo sapiens OX=9606 GN=IGLV7-46 PE=3 SV=4
787	679	Q16348|S15A2_HUMAN	Q16348	S15A2	HUMAN	93.53	8	5	5	2	4	7303.5	4198.7	0	1173.1	7	7	4	6	1	3	Carbamidomethylation; Deamidation (NQ)	81783	Solute carrier family 15 member 2 OS=Homo sapiens OX=9606 GN=SLC15A2 PE=1 SV=2
532	1033	P81605|DCD_HUMAN	P81605	DCD	HUMAN	93.3	35	23	23	23	25	3183.3	876.41	3016.7	2618.3	4	4	6	2	11	13		11284	Dermcidin OS=Homo sapiens OX=9606 GN=DCD PE=1 SV=2
383	1114	A0A075B6R2|HV404_HUMAN	A0A075B6R2	HV404	HUMAN	93.2	26	26	26	26	20	1839.5	2125.2	0	1271.1	3	1	24	21	7	4	Carbamidomethylation; Carbamylation	12848	Immunoglobulin heavy variable 4-4 OS=Homo sapiens OX=9606 GN=IGHV4-4 PE=3 SV=2
730	846	P49788|TIG1_HUMAN	P49788	TIG1	HUMAN	93.04	14	14	14	7	11	3638.6	5358.4	667.22	2680.4	4	4	5	6	2	4		33285	Retinoic acid receptor responder protein 1 OS=Homo sapiens OX=9606 GN=RARRES1 PE=1 SV=2
851	905	P02794|FRIH_HUMAN	P02794	FRIH	HUMAN	92.97	28	23	22	0	6	5798.1	3549.8		0	5	5	6	5	0	1	Acetylation (Protein N-term)	21226	Ferritin heavy chain OS=Homo sapiens OX=9606 GN=FTH1 PE=1 SV=2
1213	1087	P28074|PSB5_HUMAN	P28074	PSB5	HUMAN	92.84	14	9	10	4	0	1779	874.91	536.91		3	3	2	2	1	0		28480	Proteasome subunit beta type-5 OS=Homo sapiens OX=9606 GN=PSMB5 PE=1 SV=3
1242	743	O15230|LAMA5_HUMAN	O15230	LAMA5	HUMAN	92.64	1	1	1	0	0	1255.2	587.86			4	4	2	2	0	0	Carbamidomethylation	399740	Laminin subunit alpha-5 OS=Homo sapiens OX=9606 GN=LAMA5 PE=1 SV=8
764	938	Q9UN76|S6A14_HUMAN	Q9UN76	S6A14	HUMAN	92.61	6	3	3	5	6	8472.7	18035	2553.3	2882.2	4	4	6	4	2	3		72153	Sodium- and chloride-dependent neutral and basic amino acid transporter B(0+) OS=Homo sapiens OX=9606 GN=SLC6A14 PE=2 SV=1
1055	988	Q14019|COTL1_HUMAN	Q14019	COTL1	HUMAN	92.51	23	7	18	12	0	0	3890.2	1846.1		5	5	1	4	2	0		15945	Coactosin-like protein OS=Homo sapiens OX=9606 GN=COTL1 PE=1 SV=3
1145	1171	P20930|FILA_HUMAN	P20930	FILA	HUMAN	92.37	1	0	0	1	0	0	0	0		2	2	2	1	2	0		435180	Filaggrin OS=Homo sapiens OX=9606 GN=FLG PE=1 SV=3
1039	962	O95436|NPT2B_HUMAN	O95436	NPT2B	HUMAN	92.25	5	4	5	0	0	2566.1	1140.3			4	4	3	4	0	0	Carbamidomethylation; Oxidation (M)	75759	Sodium-dependent phosphate transport protein 2B OS=Homo sapiens OX=9606 GN=SLC34A2 PE=1 SV=3
1401	1094	Q92619|HMHA1_HUMAN	Q92619	HMHA1	HUMAN	92.2	3	2	0	0	2	0			0	3	3	2	0	0	1	Carbamidomethylation	124614	Rho GTPase-activating protein 45 OS=Homo sapiens OX=9606 GN=ARHGAP45 PE=1 SV=2
882	806	Q96BM9|ARL8A_HUMAN	Q96BM9	ARL8A	HUMAN	92.05	32	8	5	14	23	716.03			503.17	5	1	1	1	3	6	Carbamidomethylation	21416	ADP-ribosylation factor-like protein 8A OS=Homo sapiens OX=9606 GN=ARL8A PE=1 SV=1
986	1032	Q8NF50|DOCK8_HUMAN	Q8NF50	DOCK8	HUMAN	92.04	2	2	0	1	0	1126.4	0	376.43		4	4	6	1	1	0	Carbamidomethylation	238527	Dedicator of cytokinesis protein 8 OS=Homo sapiens OX=9606 GN=DOCK8 PE=1 SV=3
709	904	Q08722|CD47_HUMAN	Q08722	CD47	HUMAN	91.91	11	9	9	11	6	15556	13757	12272	7364.3	4	4	4	6	5	3		35214	Leukocyte surface antigen CD47 OS=Homo sapiens OX=9606 GN=CD47 PE=1 SV=1
997	676	Q86VP6|CAND1_HUMAN	Q86VP6	CAND1	HUMAN	91.81	7	1	2	2	3	835.13	1239.1	531.7	1127.5	7	7	1	2	2	3	Carbamidomethylation	136375	Cullin-associated NEDD8-dissociated protein 1 OS=Homo sapiens OX=9606 GN=CAND1 PE=1 SV=2
978	925	P35556|FBN2_HUMAN	P35556	FBN2	HUMAN	91.75	2	1	2	0	0		0			5	2	4	4	0	0	Carbamidomethylation	314775	Fibrillin-2 OS=Homo sapiens OX=9606 GN=FBN2 PE=1 SV=3
1091	892	Q93084|AT2A3_HUMAN	Q93084	AT2A3	HUMAN	91.69	6	2	0	4	3	668.9		781.15	2173.8	5	5	1	0	3	2	Carbamidomethylation	109256	Sarcoplasmic/endoplasmic reticulum calcium ATPase 3 OS=Homo sapiens OX=9606 GN=ATP2A3 PE=1 SV=3
1357	1428	P20592|MX2_HUMAN	P20592	MX2	HUMAN	91.59	5	3	0	0	2				0	2	1	2	0	0	1		82089	Interferon-induced GTP-binding protein Mx2 OS=Homo sapiens OX=9606 GN=MX2 PE=1 SV=1
984	666	Q92556|ELMO1_HUMAN	Q92556	ELMO1	HUMAN	91.51	10	10	1	1	0	3154.6	588.7	460.45		5	5	5	1	2	0		83829	Engulfment and cell motility protein 1 OS=Homo sapiens OX=9606 GN=ELMO1 PE=1 SV=2
692	1006	P35542|SAA4_HUMAN	P35542	SAA4	HUMAN	90.88	22	22	22	22	16	6471.2	9880.5	11394	12027	3	3	4	4	7	4	Carbamylation; Oxidation (M)	14747	Serum amyloid A-4 protein OS=Homo sapiens OX=9606 GN=SAA4 PE=1 SV=2
1196	951	Q9GZM7|TINAL_HUMAN	Q9GZM7	TINAL	HUMAN	90.68	8	5	8	0	0	0	1947.8			3	3	2	3	0	0	Carbamidomethylation	52387	Tubulointerstitial nephritis antigen-like OS=Homo sapiens OX=9606 GN=TINAGL1 PE=1 SV=1
830	621	Q05707|COEA1_HUMAN	Q05707	COEA1	HUMAN	90.56	4	1	3	2	1	1719.4	2171.5	2725.8	2056.3	6	6	2	4	4	2	Deamidation (NQ); Acetylation (Protein N-term)	193513	Collagen alpha-1(XIV) chain OS=Homo sapiens OX=9606 GN=COL14A1 PE=1 SV=3
728	1971	A0A075B6I0|LV861_HUMAN	A0A075B6I0	LV861	HUMAN	90.28	20	13	15	15	15	8750.7	10554	5661.3	3032.1	3	3	8	4	2	3	Deamidation (NQ)	12814	Immunoglobulin lambda variable 8-61 OS=Homo sapiens OX=9606 GN=IGLV8-61 PE=3 SV=7
890	827	P27695|APEX1_HUMAN	P27695	APEX1	HUMAN	90.27	15	6	6	11	5	0	2147.6	2599	413.67	4	4	2	3	5	1	Carbamidomethylation	35555	DNA-(apurinic or apyrimidinic site) endonuclease OS=Homo sapiens OX=9606 GN=APEX1 PE=1 SV=2
542	1057	P04211|LV743_HUMAN	P04211	LV743	HUMAN	89.75	21	21	21	21	14	0	0	901.22		3	1	9	6	7	9	Deamidation (NQ); Acetylation (Protein N-term)	12451	Immunoglobulin lambda variable 7-43 OS=Homo sapiens OX=9606 GN=IGLV7-43 PE=3 SV=2
897	920	Q07812|BAX_HUMAN	Q07812	BAX	HUMAN	89.6	29	16	13	23	17	847.61	488.67	2221.4	1038.5	4	4	2	2	4	3		21184	Apoptosis regulator BAX OS=Homo sapiens OX=9606 GN=BAX PE=1 SV=1
388	1142	A0A087WSY4|HV432_HUMAN	A0A087WSY4	HV432	HUMAN	89.51	26	26	20	20	19	1360.1			0	3	1	24	20	6	4	Carbamidomethylation; Carbamylation	13025	Immunoglobulin heavy variable 4-30-2 OS=Homo sapiens OX=9606 GN=IGHV4-30-2 PE=3 SV=1
918	1017	P62330|ARF6_HUMAN	P62330	ARF6	HUMAN	89.41	21	21	15	6	6	5320.7	2904.9	988.43	1256.2	3	3	4	2	1	3		20082	ADP-ribosylation factor 6 OS=Homo sapiens OX=9606 GN=ARF6 PE=1 SV=2
788	948	P03952|KLKB1_HUMAN	P03952	KLKB1	HUMAN	89.33	8	5	4	5	6	561.72	573.76	540.86	1845.8	4	4	3	2	4	5	Carbamidomethylation; Deamidation (NQ); Oxidation (M); Acetylation (Protein N-term)	71370	Plasma kallikrein OS=Homo sapiens OX=9606 GN=KLKB1 PE=1 SV=1
1103	783	Q92841|DDX17_HUMAN	Q92841	DDX17	HUMAN	89.26	6	5	3	2	0	1192.1	435.2	467.64		4	3	3	2	1	0	Carbamidomethylation	80273	Probable ATP-dependent RNA helicase DDX17 OS=Homo sapiens OX=9606 GN=DDX17 PE=1 SV=2
1056	1023	P25788|PSA3_HUMAN	P25788	PSA3	HUMAN	89.26	18	16	7	5	5	926.22	784.06	0	632.79	4	4	3	2	1	1	Acetylation (Protein N-term)	28433	Proteasome subunit alpha type-3 OS=Homo sapiens OX=9606 GN=PSMA3 PE=1 SV=2
835	884	P07602|SAP_HUMAN	P07602	SAP	HUMAN	89.19	7	5	2	6	4	661.43	777.28	680.14	0	4	4	4	2	4	2	Carbamidomethylation	58113	Prosaposin OS=Homo sapiens OX=9606 GN=PSAP PE=1 SV=2
877	746	Q9Y624|JAM1_HUMAN	Q9Y624	JAM1	HUMAN	89.09	21	15	17	7	3	287.53	1952.8	982.28	0	5	5	3	4	3	1	Carbamidomethylation	32583	Junctional adhesion molecule A OS=Homo sapiens OX=9606 GN=F11R PE=1 SV=1
1047	834	P13798|ACPH_HUMAN	P13798	ACPH	HUMAN	89.03	5	3	4	1	1	1761.8	647.84	677.18	438.66	4	4	2	3	1	1		81225	Acylamino-acid-releasing enzyme OS=Homo sapiens OX=9606 GN=APEH PE=1 SV=4
1147	1219	O75165|DJC13_HUMAN	O75165	DJC13	HUMAN	88.85	1	1	1	1	0	681.55	383.71	693.68		2	2	2	1	2	0		254412	DnaJ homolog subfamily C member 13 OS=Homo sapiens OX=9606 GN=DNAJC13 PE=1 SV=5
453	960	Q03113|GNA12_HUMAN	Q03113	GNA12	HUMAN	88.34	8	5	5	8	5			0		3	1	10	9	12	13	Carbamylation	44279	Guanine nucleotide-binding protein subunit alpha-12 OS=Homo sapiens OX=9606 GN=GNA12 PE=1 SV=4
823	795	Q9Y376|CAB39_HUMAN	Q9Y376	CAB39	HUMAN	88.21	16	11	14	3	3	3752.1	4462.3	768.68	0	6	6	5	5	1	2	Carbamidomethylation	39869	Calcium-binding protein 39 OS=Homo sapiens OX=9606 GN=CAB39 PE=1 SV=1
1191	1639	Q9HBH0|RHOF_HUMAN	Q9HBH0	RHOF	HUMAN	87.83	14	9	9	0	5	366.22	315.24		564.7	2	2	2	2	0	1	Carbamidomethylation; Acetylation (Protein N-term)	23625	Rho-related GTP-binding protein RhoF OS=Homo sapiens OX=9606 GN=RHOF PE=1 SV=1
887	915	Q14574|DSC3_HUMAN	Q14574	DSC3	HUMAN	87.74	4	0	0	4	4			520.66	1874.5	3	3	0	0	4	7	Carbamidomethylation	99969	Desmocollin-3 OS=Homo sapiens OX=9606 GN=DSC3 PE=1 SV=3
821	1493	Q9NRJ3|CCL28_HUMAN	Q9NRJ3	CCL28	HUMAN	87.7	20	9	20	9	20	6358.1	3202.8	5202.6	449.5	2	2	2	3	5	3	Carbamidomethylation	14280	C-C motif chemokine 28 OS=Homo sapiens OX=9606 GN=CCL28 PE=1 SV=1
1395	1374	A0A0C4DH24|KV621_HUMAN	A0A0C4DH24	KV621	HUMAN	87.63	18	18	11	0	0	1203.5	1081.7			2	1	2	1	0	0	Carbamidomethylation	12430	Immunoglobulin kappa variable 6-21 OS=Homo sapiens OX=9606 GN=IGKV6-21 PE=3 SV=1
754	1965	A0A087WSY6|KVD15_HUMAN	A0A087WSY6	KVD15	HUMAN	87.62	26	26	26	26	18	4631.4	3354.6	877.86		2	1	7	6	2	1		12534	Immunoglobulin kappa variable 3D-15 OS=Homo sapiens OX=9606 GN=IGKV3D-15 PE=3 SV=6
438	3571	O60635|TSN1_HUMAN	O60635	TSN1	HUMAN	87.56	7	7	7	7	5	3524.1	5692.8	1485.2	0	2	2	21	14	10	2	Carbamidomethylation; Deamidation (NQ)	26301	Tetraspanin-1 OS=Homo sapiens OX=9606 GN=TSPAN1 PE=1 SV=2
1246	1274	P10644|KAP0_HUMAN	P10644	KAP0	HUMAN	87.48	8	4	3	3	3	587.05	454.7	554.75	373.54	2	2	1	1	1	1	Acetylation (Protein N-term)	42982	cAMP-dependent protein kinase type I-alpha regulatory subunit OS=Homo sapiens OX=9606 GN=PRKAR1A PE=1 SV=1
312	1938	P01700|LV147_HUMAN	P01700	LV147	HUMAN	87.4	25	25	25	25	25	24561	18049	5447.6	7507.3	2	2	24	29	13	14	Deamidation (NQ)	12284	Immunoglobulin lambda variable 1-47 OS=Homo sapiens OX=9606 GN=IGLV1-47 PE=1 SV=2
1649	1652	A0A0G2JS06|LV539_HUMAN	A0A0G2JS06	LV539	HUMAN	87.39	20	7	13	0	0	1753.5	2761.7			2	2	1	1	0	0		13394	Immunoglobulin lambda variable 5-39 OS=Homo sapiens OX=9606 GN=IGLV5-39 PE=3 SV=1
836	1093	Q15819|UB2V2_HUMAN	Q15819	UB2V2	HUMAN	87.38	30	12	14	18	7			521.97		4	1	2	4	3	3		16363	Ubiquitin-conjugating enzyme E2 variant 2 OS=Homo sapiens OX=9606 GN=UBE2V2 PE=1 SV=4
912	1003	P33908|MA1A1_HUMAN	P33908	MA1A1	HUMAN	87.37	5	4	1	1	3	1470.6	1092.9	0	1684.9	3	3	5	1	1	3		72969	Mannosyl-oligosaccharide 1 2-alpha-mannosidase IA OS=Homo sapiens OX=9606 GN=MAN1A1 PE=1 SV=3
695	1941	P01714|LV319_HUMAN	P01714	LV319	HUMAN	87.36	17	17	17	17	17	21117	32634	16411	1516.5	2	2	5	6	5	3	Carbamidomethylation; Deamidation (NQ)	12042	Immunoglobulin lambda variable 3-19 OS=Homo sapiens OX=9606 GN=IGLV3-19 PE=1 SV=2
1037	1106	P36969|GPX4_HUMAN	P36969	GPX4	HUMAN	87.27	18	18	12	6	0	856.52	945.67	878.45		3	3	3	2	2	0	Carbamidomethylation	22175	Phospholipid hydroperoxide glutathione peroxidase OS=Homo sapiens OX=9606 GN=GPX4 PE=1 SV=3
804	932	P12882|MYH1_HUMAN	P12882	MYH1	HUMAN	87.23	2	1	1	1	0	0		1481.7		4	2	4	5	2	2	Carbamidomethylation; Carbamylation; Deamidation (NQ)	223143	Myosin-1 OS=Homo sapiens OX=9606 GN=MYH1 PE=1 SV=3
1067	1020	O75558|STX11_HUMAN	O75558	STX11	HUMAN	87.18	13	7	13	0	3	719.35	1389.4		646.73	3	3	2	4	0	1		33196	Syntaxin-11 OS=Homo sapiens OX=9606 GN=STX11 PE=1 SV=1
937	927	Q9HC38|GLOD4_HUMAN	Q9HC38	GLOD4	HUMAN	87.15	13	7	4	10	4	1701.9	1005.7	1537.4	800.4	4	4	2	1	4	2		34793	Glyoxalase domain-containing protein 4 OS=Homo sapiens OX=9606 GN=GLOD4 PE=1 SV=1
871	798	Q5QGZ9|CL12A_HUMAN	Q5QGZ9	CL12A	HUMAN	86.86	27	21	18	12	12	1144.5	1131.8	947.47	0	5	5	4	3	2	2	Carbamidomethylation; Oxidation (M)	30762	C-type lectin domain family 12 member A OS=Homo sapiens OX=9606 GN=CLEC12A PE=1 SV=3
816	1489	P08962|CD63_HUMAN	P08962	CD63	HUMAN	86.81	8	8	3	4	8	12857	7404.1	2520.4	6255.1	3	3	5	3	2	3	Oxidation (M)	25637	CD63 antigen OS=Homo sapiens OX=9606 GN=CD63 PE=1 SV=2
569	1939	Q96S97|MYADM_HUMAN	Q96S97	MYADM	HUMAN	86.58	10	10	10	10	10	3803.7	2201.6	1347.8	1457.3	2	2	9	7	8	4	Oxidation (M)	35274	Myeloid-associated differentiation marker OS=Homo sapiens OX=9606 GN=MYADM PE=1 SV=2
614	982	P20340|RAB6A_HUMAN	P20340	RAB6A	HUMAN	86.49	16	16	5	5	11	881.77			0	3	2	8	2	5	9	Carbamylation; Deamidation (NQ); Acetylation (Protein N-term)	23593	Ras-related protein Rab-6A OS=Homo sapiens OX=9606 GN=RAB6A PE=1 SV=3
854	2640	A0A075B6H9|LV469_HUMAN	A0A075B6H9	LV469	HUMAN	86.26	14	14	14	14	14	15438	15080	10434	3312.7	2	2	3	4	2	3		12773	Immunoglobulin lambda variable 4-69 OS=Homo sapiens OX=9606 GN=IGLV4-69 PE=1 SV=1
766	855	P11279|LAMP1_HUMAN	P11279	LAMP1	HUMAN	86.03	8	7	6	8	7	3809.6	0	6149.1	14916	4	4	3	3	5	4	Deamidation (NQ)	44882	Lysosome-associated membrane glycoprotein 1 OS=Homo sapiens OX=9606 GN=LAMP1 PE=1 SV=3
965	788	Q13636|RAB31_HUMAN	Q13636	RAB31	HUMAN	85.75	22	6	11	16	13			1646.1	726.41	4	2	1	3	3	2	Carbamidomethylation	21569	Ras-related protein Rab-31 OS=Homo sapiens OX=9606 GN=RAB31 PE=1 SV=1
1183	972	P28070|PSB4_HUMAN	P28070	PSB4	HUMAN	85.67	13	13	4	0	4	2640.2	1080.4		563.88	3	3	3	1	0	1		29204	Proteasome subunit beta type-4 OS=Homo sapiens OX=9606 GN=PSMB4 PE=1 SV=4
911	891	P43250|GRK6_HUMAN	P43250	GRK6	HUMAN	85.42	9	5	5	6	2	2482.6	1193.6	2419.9	1296.6	4	4	3	2	4	1	Carbamidomethylation; Acetylation (Protein N-term)	65991	G protein-coupled receptor kinase 6 OS=Homo sapiens OX=9606 GN=GRK6 PE=1 SV=2
773	1948	Q03405|UPAR_HUMAN	Q03405	UPAR	HUMAN	85.18	9	9	9	5	5	1639.3	0	468.41	1240.7	2	2	4	4	2	5	Carbamidomethylation; Oxidation (M)	36978	Urokinase plasminogen activator surface receptor OS=Homo sapiens OX=9606 GN=PLAUR PE=1 SV=1
815	761	P43405|KSYK_HUMAN	P43405	KSYK	HUMAN	85.16	6	6	3	3	5	3513.9	1513.4	472.11	1919.4	4	4	4	4	2	3	Carbamidomethylation	72066	Tyrosine-protein kinase SYK OS=Homo sapiens OX=9606 GN=SYK PE=1 SV=1
982	809	O60603|TLR2_HUMAN	O60603	TLR2	HUMAN	85.03	6	5	3	0	1	1833.7	612.79		0	4	4	5	2	0	1		89838	Toll-like receptor 2 OS=Homo sapiens OX=9606 GN=TLR2 PE=1 SV=1
1092	974	Q8IYJ3|SYTL1_HUMAN	Q8IYJ3	SYTL1	HUMAN	84.77	6	4	2	4	2	436.64	810.03	1324.8	1129.8	3	3	2	1	2	1	Carbamidomethylation	61857	Synaptotagmin-like protein 1 OS=Homo sapiens OX=9606 GN=SYTL1 PE=1 SV=1
1156	792	P13667|PDIA4_HUMAN	P13667	PDIA4	HUMAN	84.51	7	0	5	0	3		1519.9		510.56	4	4	0	3	0	2		72933	Protein disulfide-isomerase A4 OS=Homo sapiens OX=9606 GN=PDIA4 PE=1 SV=2
879	807	Q5XXA6|ANO1_HUMAN	Q5XXA6	ANO1	HUMAN	84.46	5	3	3	0	0	3625.6	3763.4			6	6	5	6	0	0		114078	Anoctamin-1 OS=Homo sapiens OX=9606 GN=ANO1 PE=1 SV=1
1090	1172	Q9H444|CHM4B_HUMAN	Q9H444	CHM4B	HUMAN	84.4	14	6	6	6	8	1537.2	1063.2	909.71	1669.1	3	3	1	2	1	2	Carbamylation	24950	Charged multivesicular body protein 4b OS=Homo sapiens OX=9606 GN=CHMP4B PE=1 SV=1
888	1078	Q9BRF8|CPPED_HUMAN	Q9BRF8	CPPED	HUMAN	84.31	10	10	7	4	10	1509.6	3222.1	1028.2	1743.2	3	3	4	3	1	3	Acetylation (Protein N-term)	35548	Serine/threonine-protein phosphatase CPPED1 OS=Homo sapiens OX=9606 GN=CPPED1 PE=1 SV=3
1050	922	P15880|RS2_HUMAN	P15880	RS2	HUMAN	84.22	10	8	4	4	10	3079.2	0	1826.8	2873.4	3	3	2	1	1	3	Carbamidomethylation	31324	40S ribosomal protein S2 OS=Homo sapiens OX=9606 GN=RPS2 PE=1 SV=2
801	1553	P08567|PLEK_HUMAN	P08567	PLEK	HUMAN	84.14	8	8	4	4	4	2416.2	2043.8	2289.8	766.63	2	2	4	3	4	3	Carbamidomethylation; Deamidation (NQ)	40125	Pleckstrin OS=Homo sapiens OX=9606 GN=PLEK PE=1 SV=3
954	1448	Q9UBX7|KLK11_HUMAN	Q9UBX7	KLK11	HUMAN	83.9	7	4	4	7	7	2317	0	3398.6	2838	2	2	1	1	5	2	Carbamidomethylation	31059	Kallikrein-11 OS=Homo sapiens OX=9606 GN=KLK11 PE=1 SV=2
1104	1025	P36222|CH3L1_HUMAN	P36222	CH3L1	HUMAN	83.66	9	3	0	7	5	492.17		1770.1	1374.4	3	3	1	0	2	3		42625	Chitinase-3-like protein 1 OS=Homo sapiens OX=9606 GN=CHI3L1 PE=1 SV=2
967	1084	Q9BRA2|TXD17_HUMAN	Q9BRA2	TXD17	HUMAN	83.42	34	27	19	19	11	835.23	735.97	0	516.16	3	3	2	3	3	1	Carbamidomethylation	13941	Thioredoxin domain-containing protein 17 OS=Homo sapiens OX=9606 GN=TXNDC17 PE=1 SV=1
905	890	P35611|ADDA_HUMAN	P35611	ADDA	HUMAN	83.06	7	5	3	2	3	2466.7	742.96	0	0	4	4	5	2	1	2		80955	Alpha-adducin OS=Homo sapiens OX=9606 GN=ADD1 PE=1 SV=2
1100	1077	P23141|EST1_HUMAN	P23141	EST1	HUMAN	83.05	8	6	3	0	0	1588.1	1393			4	4	3	3	0	0	Carbamidomethylation	62521	Liver carboxylesterase 1 OS=Homo sapiens OX=9606 GN=CES1 PE=1 SV=2
822	895	Q96FN4|CPNE2_HUMAN	Q96FN4	CPNE2	HUMAN	82.94	7	4	3	3	3	978.81	448.9	758.16	0	4	3	4	4	2	3	Carbamidomethylation; Carbamylation	61190	Copine-2 OS=Homo sapiens OX=9606 GN=CPNE2 PE=1 SV=3
923	754	P42685|FRK_HUMAN	P42685	FRK	HUMAN	82.8	12	12	7	1	0	2681.2	1664.5	416.13		5	5	6	3	1	0		58254	Tyrosine-protein kinase FRK OS=Homo sapiens OX=9606 GN=FRK PE=1 SV=1
1004	1073	P62070|RRAS2_HUMAN	P62070	RRAS2	HUMAN	82.64	19	11	6	11	14	1028.4	301.44	609.2	600.98	3	1	2	2	2	2	Deamidation (NQ)	23400	Ras-related protein R-Ras2 OS=Homo sapiens OX=9606 GN=RRAS2 PE=1 SV=1
920	782	P12955|PEPD_HUMAN	P12955	PEPD	HUMAN	82.56	10	3	0	7	8	582.48		1456.3	1476.1	5	5	1	0	5	4	Carbamidomethylation; Acetylation (Protein N-term)	54548	Xaa-Pro dipeptidase OS=Homo sapiens OX=9606 GN=PEPD PE=1 SV=3
973	1957	P14324|FPPS_HUMAN	P14324	FPPS	HUMAN	82.48	6	4	2	6	4	1872.3	1481.6	2394.1	0	2	2	1	1	6	1		48276	Farnesyl pyrophosphate synthase OS=Homo sapiens OX=9606 GN=FDPS PE=1 SV=4
1132	1442	Q9BW04|SARG_HUMAN	Q9BW04	SARG	HUMAN	82.39	4	2	4	2	0	663.06	917.01	321.43		2	2	1	3	2	0		63964	Specifically androgen-regulated gene protein OS=Homo sapiens OX=9606 GN=SARG PE=1 SV=2
680	1061	O95867|LY66C_HUMAN	O95867	LY66C	HUMAN	81.9	26	19	26	26	26	8155.8	5144.8	3631.7	4303.6	3	3	5	6	4	5	Carbamidomethylation	13821	Lymphocyte antigen 6 complex locus protein G6c OS=Homo sapiens OX=9606 GN=LY6G6C PE=1 SV=1
1006	1039	P17174|AATC_HUMAN	P17174	AATC	HUMAN	81.87	18	11	8	2	3	2278.3	1643	873.24	820.51	5	5	3	2	1	2		46248	Aspartate aminotransferase cytoplasmic OS=Homo sapiens OX=9606 GN=GOT1 PE=1 SV=3
757	1942	P62942|FKB1A_HUMAN	P62942	FKB1A	HUMAN	81.87	25	25	25	12	25	6391.2	2445.4	4777.8	5298.9	2	2	2	7	2	5		11951	Peptidyl-prolyl cis-trans isomerase FKBP1A OS=Homo sapiens OX=9606 GN=FKBP1A PE=1 SV=2
861	768	O60282|KIF5C_HUMAN	O60282	KIF5C	HUMAN	81.59	5	4	2	2	2	0				4	1	4	2	3	2	Carbamidomethylation; Carbamylation; Deamidation (NQ)	109495	Kinesin heavy chain isoform 5C OS=Homo sapiens OX=9606 GN=KIF5C PE=1 SV=1
1095	1059	Q9UKK3|PARP4_HUMAN	Q9UKK3	PARP4	HUMAN	81.47	2	2	1	0	1	1358.2	530.34		547.9	4	4	3	1	0	2	Deamidation (NQ)	192593	Protein mono-ADP-ribosyltransferase PARP4 OS=Homo sapiens OX=9606 GN=PARP4 PE=1 SV=3
713	1979	Q16651|PRSS8_HUMAN	Q16651	PRSS8	HUMAN	81.37	6	4	6	6	6	8250.2	8642.3	1734.2	6177.9	2	2	3	6	5	4	Deamidation (NQ)	36431	Prostasin OS=Homo sapiens OX=9606 GN=PRSS8 PE=1 SV=1
990	902	Q92888|ARHG1_HUMAN	Q92888	ARHG1	HUMAN	81.27	8	3	3	3	0	864.16	1047.5	428.14		7	7	3	3	3	0	Carbamidomethylation; Carbamylation	102435	Rho guanine nucleotide exchange factor 1 OS=Homo sapiens OX=9606 GN=ARHGEF1 PE=1 SV=2
853	1559	P02745|C1QA_HUMAN	P02745	C1QA	HUMAN	81.1	4	4	4	4	4	7018.8	1140.2	830.85	8935.8	2	2	5	2	2	3	Carbamidomethylation	26017	Complement C1q subcomponent subunit A OS=Homo sapiens OX=9606 GN=C1QA PE=1 SV=2
751	1079	P08493|MGP_HUMAN	P08493	MGP	HUMAN	81.08	32	11	19	32	23	4515.5	4162.3	8473.9	8636.7	3	3	2	4	5	5	Deamidation (NQ); Oxidation (M)	12353	Matrix Gla protein OS=Homo sapiens OX=9606 GN=MGP PE=1 SV=2
839	758	P48595|SPB10_HUMAN	P48595	SPB10	HUMAN	80.91	15	15	10	6	4	4870.6	3340.6	685.32	787.66	5	5	6	3	2	1		45403	Serpin B10 OS=Homo sapiens OX=9606 GN=SERPINB10 PE=1 SV=1
964	1301	P02763|A1AG1_HUMAN	P02763	A1AG1	HUMAN	80.79	9	8	9	4	5	6676.5	5248.6	0	503	3	3	2	4	1	2	Carbamidomethylation	23512	Alpha-1-acid glycoprotein 1 OS=Homo sapiens OX=9606 GN=ORM1 PE=1 SV=1
1014	953	P22061|PIMT_HUMAN	P22061	PIMT	HUMAN	80.55	17	12	14	4	4	1942.6	1248.1	3079.4	3169.1	4	4	3	3	1	1		24636	Protein-L-isoaspartate(D-aspartate) O-methyltransferase OS=Homo sapiens OX=9606 GN=PCMT1 PE=1 SV=4
889	1451	P01903|DRA_HUMAN	P01903	DRA	HUMAN	80.52	11	11	11	0	0	3902.8	1108.8			2	2	7	4	0	0	Deamidation (NQ)	28607	HLA class II histocompatibility antigen DR alpha chain OS=Homo sapiens OX=9606 GN=HLA-DRA PE=1 SV=1
949	823	Q9Y6W5|WASF2_HUMAN	Q9Y6W5	WASF2	HUMAN	80.45	12	10	0	6	4	3139.3		1903.3	631.59	5	5	4	0	3	2	Carbamylation	54284	Wiskott-Aldrich syndrome protein family member 2 OS=Homo sapiens OX=9606 GN=WASF2 PE=1 SV=3
910	814	P30085|KCY_HUMAN	P30085	KCY	HUMAN	80.42	26	17	6	10	19	2050.8	491.58	991.14	1540.6	4	4	4	1	2	3		22222	UMP-CMP kinase OS=Homo sapiens OX=9606 GN=CMPK1 PE=1 SV=3
1033	1148	P62195|PRS8_HUMAN	P62195	PRS8	HUMAN	80.4	10	6	6	7	3	986.67	0	237.63	0	3	2	2	2	2	1		45626	26S proteasome regulatory subunit 8 OS=Homo sapiens OX=9606 GN=PSMC5 PE=1 SV=1
930	885	P24043|LAMA2_HUMAN	P24043	LAMA2	HUMAN	80.31	2	1	1	0	0	1565.7	366.11			4	4	6	3	0	0	Carbamidomethylation	343906	Laminin subunit alpha-2 OS=Homo sapiens OX=9606 GN=LAMA2 PE=1 SV=4
1045	1503	P34096|RNAS4_HUMAN	P34096	RNAS4	HUMAN	80.3	19	7	19	7	19	1998.5	1915.2	1713.5	0	2	2	1	2	1	3	Carbamidomethylation	16840	Ribonuclease 4 OS=Homo sapiens OX=9606 GN=RNASE4 PE=1 SV=3
725	1414	O95197|RTN3_HUMAN	O95197	RTN3	HUMAN	80.27	5	5	1	5	5	23989	2997.1	1787.5	2621.7	2	2	4	2	7	4	Carbamidomethylation; Deamidation (NQ); Acetylation (Protein N-term)	112611	Reticulon-3 OS=Homo sapiens OX=9606 GN=RTN3 PE=1 SV=2
857	873	P59827|BPIB4_HUMAN	P59827	BPIB4	HUMAN	80.25	7	6	7	0	0	1626.5	1943.5			4	4	5	7	0	0	Carbamidomethylation	65055	BPI fold-containing family B member 4 OS=Homo sapiens OX=9606 GN=BPIFB4 PE=2 SV=2
1020	1782	P21462|FPR1_HUMAN	P21462	FPR1	HUMAN	80.22	8	3	8	3	0	3570.6	1913.1	0		2	2	5	2	1	0	Carbamidomethylation	38446	fMet-Leu-Phe receptor OS=Homo sapiens OX=9606 GN=FPR1 PE=1 SV=3
826	1054	P13866|SC5A1_HUMAN	P13866	SC5A1	HUMAN	80.18	7	4	5	4	4	2504.7	2073.8	2423.4	708.03	4	4	3	5	3	2	Carbamidomethylation	73498	Sodium/glucose cotransporter 1 OS=Homo sapiens OX=9606 GN=SLC5A1 PE=1 SV=1
1200	1236	P11166|GTR1_HUMAN	P11166	GTR1	HUMAN	80.12	5	5	2	0	0	1256.1	2718.9			2	2	3	2	0	0		54084	Solute carrier family 2 facilitated glucose transporter member 1 OS=Homo sapiens OX=9606 GN=SLC2A1 PE=1 SV=2
991	737	P40227|TCPZ_HUMAN	P40227	TCPZ	HUMAN	80.05	10	8	4	4	0	2963.5	2040.1	1220.5		5	5	4	2	2	0		58024	T-complex protein 1 subunit zeta OS=Homo sapiens OX=9606 GN=CCT6A PE=1 SV=3
443	1627	P14174|MIF_HUMAN	P14174	MIF	HUMAN	80.04	17	17	17	17	17	18632	11618	7887.2	7214	2	2	10	12	14	10	Carbamidomethylation; Carbamylation	12476	Macrophage migration inhibitory factor OS=Homo sapiens OX=9606 GN=MIF PE=1 SV=4
878	1201	A8MVS5|HIDE1_HUMAN	A8MVS5	HIDE1	HUMAN	79.81	17	17	17	7	0	1260.1	1288.1	538.97		2	2	6	4	1	0		24753	Protein HIDE1 OS=Homo sapiens OX=9606 GN=HIDE1 PE=1 SV=2
849	949	P49795|RGS19_HUMAN	P49795	RGS19	HUMAN	79.77	16	16	12	16	10	4186.5	2739.8	4056.6	1697.4	3	3	3	2	3	4		24636	Regulator of G-protein signaling 19 OS=Homo sapiens OX=9606 GN=RGS19 PE=1 SV=1
950	824	P33121|ACSL1_HUMAN	P33121	ACSL1	HUMAN	79.76	6	3	2	1	3	1714.1	1088.3	1144.4	917.19	4	4	2	1	2	4	Carbamidomethylation	77943	Long-chain-fatty-acid--CoA ligase 1 OS=Homo sapiens OX=9606 GN=ACSL1 PE=1 SV=1
1120	1311	O75563|SKAP2_HUMAN	O75563	SKAP2	HUMAN	79.75	7	7	7	0	0	945.65	1033.7			2	2	3	3	0	0	Carbamidomethylation	41217	Src kinase-associated phosphoprotein 2 OS=Homo sapiens OX=9606 GN=SKAP2 PE=1 SV=1
944	917	Q6KB66|K2C80_HUMAN	Q6KB66	K2C80	HUMAN	79.72	7	0	0	7	7			0	1314.3	3	2	0	0	5	4		50525	Keratin type II cytoskeletal 80 OS=Homo sapiens OX=9606 GN=KRT80 PE=1 SV=2
1036	851	P54136|SYRC_HUMAN	P54136	SYRC	HUMAN	79.7	10	7	3	2	2	379.1	0	746.53	0	5	5	3	2	1	1	Carbamidomethylation	75379	Arginine--tRNA ligase cytoplasmic OS=Homo sapiens OX=9606 GN=RARS1 PE=1 SV=2
1001	947	Q08431|MFGM_HUMAN	Q08431	MFGM	HUMAN	79.53	9	3	3	3	9	0	0	453.69	636	3	3	2	1	2	3	Carbamidomethylation	43105	Lactadherin OS=Homo sapiens OX=9606 GN=MFGE8 PE=1 SV=3
947	868	Q9NZD2|GLTP_HUMAN	Q9NZD2	GLTP	HUMAN	79.51	26	6	10	11	17	503.12	1611.1	1581	2698.2	5	5	1	2	2	4	Carbamidomethylation; Acetylation (Protein N-term)	23850	Glycolipid transfer protein OS=Homo sapiens OX=9606 GN=GLTP PE=1 SV=3
855	1164	P62328|TYB4_HUMAN	P62328	TYB4	HUMAN	79.4	86	59	59	59	59	2925.5	1002.3	3035.9	2778.8	4	4	2	2	5	3	Acetylation (Protein N-term)	5053	Thymosin beta-4 OS=Homo sapiens OX=9606 GN=TMSB4X PE=1 SV=2
1110	1543	Q9Y6N5|SQOR_HUMAN	Q9Y6N5	SQOR	HUMAN	79.37	6	6	3	3	3	386.54	0	1405.7	0	2	2	3	1	1	1		49961	Sulfide:quinone oxidoreductase mitochondrial OS=Homo sapiens OX=9606 GN=SQOR PE=1 SV=1
938	872	P35221|CTNA1_HUMAN	P35221	CTNA1	HUMAN	79.36	8	2	3	1	4	828.29	2050.5	193.27	43579	7	7	2	3	1	3	Carbamylation; Deamidation (NQ); Acetylation (Protein N-term)	100071	Catenin alpha-1 OS=Homo sapiens OX=9606 GN=CTNNA1 PE=1 SV=1
1158	1211	Q13492|PICAL_HUMAN	Q13492	PICAL	HUMAN	79.17	4	2	4	2	2	456.76	1070	0	284.03	2	2	1	2	1	1		70755	Phosphatidylinositol-binding clathrin assembly protein OS=Homo sapiens OX=9606 GN=PICALM PE=1 SV=2
1483	1747	Q92743|HTRA1_HUMAN	Q92743	HTRA1	HUMAN	79.11	5	0	2	3	0		780.68	606.38		2	2	0	1	2	0	Carbamidomethylation	51287	Serine protease HTRA1 OS=Homo sapiens OX=9606 GN=HTRA1 PE=1 SV=1
1122	1695	Q9H8S9|MOB1A_HUMAN	Q9H8S9	MOB1A	HUMAN	78.88	11	11	5	11	6	1904.9	554.88	575.85	593.62	2	2	2	1	2	1		25080	MOB kinase activator 1A OS=Homo sapiens OX=9606 GN=MOB1A PE=1 SV=4
1122	1696	Q7L9L4|MOB1B_HUMAN	Q7L9L4	MOB1B	HUMAN	78.88	11	11	5	11	6	1904.9	554.88	575.85	593.62	2	2	2	1	2	1		25091	MOB kinase activator 1B OS=Homo sapiens OX=9606 GN=MOB1B PE=1 SV=3
885	1072	P20292|AL5AP_HUMAN	P20292	AL5AP	HUMAN	78.87	19	19	13	13	11	5822.8	6488.1	7713.8	6517.1	3	3	5	2	2	2		18157	Arachidonate 5-lipoxygenase-activating protein OS=Homo sapiens OX=9606 GN=ALOX5AP PE=1 SV=2
1063	1064	Q9UL26|RB22A_HUMAN	Q9UL26	RB22A	HUMAN	78.84	22	6	11	6	16				564.66	3	1	1	3	1	2	Carbamidomethylation	21855	Ras-related protein Rab-22A OS=Homo sapiens OX=9606 GN=RAB22A PE=1 SV=2
927	1972	A0A075B6J9|LV218_HUMAN	A0A075B6J9	LV218	HUMAN	78.73	25	25	11	11	11	2794.4	1744.6	0	1484.3	2	2	3	4	2	1	Deamidation (NQ)	12412	Immunoglobulin lambda variable 2-18 OS=Homo sapiens OX=9606 GN=IGLV2-18 PE=3 SV=2
1255	1180	Q9Y6K5|OAS3_HUMAN	Q9Y6K5	OAS3	HUMAN	78.6	2	0	0	2	1			1015.2	605.4	2	2	0	0	2	2	Carbamidomethylation	121170	2'-5'-oligoadenylate synthase 3 OS=Homo sapiens OX=9606 GN=OAS3 PE=1 SV=3
808	1156	P17693|HLAG_HUMAN	P17693	HLAG	HUMAN	78.48	11	4	11	11	4		0	3517.4		2	1	2	3	5	3	Deamidation (NQ)	38224	HLA class I histocompatibility antigen alpha chain G OS=Homo sapiens OX=9606 GN=HLA-G PE=1 SV=1
1492	1783	P20851|C4BPB_HUMAN	P20851	C4BPB	HUMAN	78.45	9	5	5	4	0	874.67	518.34	0		2	2	1	1	1	0	Carbamidomethylation	28357	C4b-binding protein beta chain OS=Homo sapiens OX=9606 GN=C4BPB PE=1 SV=1
1127	1067	Q3B8N2|LEG9B_HUMAN	Q3B8N2	LEG9B	HUMAN	78.36	9	3	3	2	9				0	3	1	1	1	1	3	Carbamidomethylation; Deamidation (NQ)	39660	Galectin-9B OS=Homo sapiens OX=9606 GN=LGALS9B PE=1 SV=3
1127	1068	Q6DKI2|LEG9C_HUMAN	Q6DKI2	LEG9C	HUMAN	78.36	9	3	3	2	9				0	3	1	1	1	1	3	Carbamidomethylation; Deamidation (NQ)	39607	Galectin-9C OS=Homo sapiens OX=9606 GN=LGALS9C PE=1 SV=2
658	994	A0A075B6Q5|HV364_HUMAN	A0A075B6Q5	HV364	HUMAN	78.3	25	25	25	15	6	2429.6	1617.4	0		3	2	7	9	4	1	Carbamidomethylation	12891	Immunoglobulin heavy variable 3-64 OS=Homo sapiens OX=9606 GN=IGHV3-64 PE=3 SV=1
1389	1186	P41250|GARS_HUMAN	P41250	GARS	HUMAN	78.11	3	1	0	2	2	0		0	479.11	2	2	1	0	1	1	Carbamidomethylation	83166	Glycine--tRNA ligase OS=Homo sapiens OX=9606 GN=GARS1 PE=1 SV=3
1167	1375	A0A0A0MT36|KVD21_HUMAN	A0A0A0MT36	KVD21	HUMAN	77.92	18	18	11	11	11	0	1299.7	1188	841.37	2	1	2	1	1	1	Carbamidomethylation	12340	Immunoglobulin kappa variable 6D-21 OS=Homo sapiens OX=9606 GN=IGKV6D-21 PE=3 SV=1
1275	1418	P31689|DNJA1_HUMAN	P31689	DNJA1	HUMAN	77.81	6	3	6	0	0	1001.4	701.33			2	2	1	3	0	0	Deamidation (NQ)	44868	DnaJ homolog subfamily A member 1 OS=Homo sapiens OX=9606 GN=DNAJA1 PE=1 SV=2
960	1239	O60262|GBG7_HUMAN	O60262	GBG7	HUMAN	77.67	35	21	21	35	21	2251.3	1921.3	4799.3	1273.4	2	2	3	2	3	1	Carbamidomethylation; Acetylation (Protein N-term)	7522	Guanine nucleotide-binding protein G(I)/G(S)/G(O) subunit gamma-7 OS=Homo sapiens OX=9606 GN=GNG7 PE=1 SV=1
410	1951	A0A075B6H7|KV37_HUMAN	A0A075B6H7	KV37	HUMAN	77.52	23	23	23	23	23	5537.1	1320.6	0	0	2	1	17	12	8	13	Carbamylation; Deamidation (NQ)	12783	Probable non-functional immunoglobulin kappa variable 3-7 OS=Homo sapiens OX=9606 GN=IGKV3-7 PE=1 SV=1
1040	1208	Q32MZ4|LRRF1_HUMAN	Q32MZ4	LRRF1	HUMAN	77.24	3	2	3	2	2	531.89	822.03	0	491.19	2	2	2	3	1	1		89253	Leucine-rich repeat flightless-interacting protein 1 OS=Homo sapiens OX=9606 GN=LRRFIP1 PE=1 SV=2
859	1152	P12883|MYH7_HUMAN	P12883	MYH7	HUMAN	77.19	2	0	1	1	0			1340.5		3	1	3	5	1	2	Carbamidomethylation; Carbamylation; Deamidation (NQ)	223095	Myosin-7 OS=Homo sapiens OX=9606 GN=MYH7 PE=1 SV=5
859	1160	P13533|MYH6_HUMAN	P13533	MYH6	HUMAN	77.19	2	0	1	1	0			1340.5		3	1	3	5	1	2	Carbamidomethylation; Carbamylation; Deamidation (NQ)	223733	Myosin-6 OS=Homo sapiens OX=9606 GN=MYH6 PE=1 SV=5
693	1976	A0A0C4DH43|HV70D_HUMAN	A0A0C4DH43	HV70D	HUMAN	77.04	24	24	24	24	24	6235	4483.7	3807.6	1967.7	2	2	6	2	7	4	Carbamidomethylation; Deamidation (NQ)	13312	Immunoglobulin heavy variable 2-70D OS=Homo sapiens OX=9606 GN=IGHV2-70D PE=3 SV=1
1136	1402	Q00765|REEP5_HUMAN	Q00765	REEP5	HUMAN	77	10	10	5	10	5	1637	1401.1	1062.1	956.13	2	2	2	1	2	1	Carbamidomethylation	21493	Receptor expression-enhancing protein 5 OS=Homo sapiens OX=9606 GN=REEP5 PE=1 SV=3
970	1968	Q9H299|SH3L3_HUMAN	Q9H299	SH3L3	HUMAN	76.97	31	11	31	31	11	0	7381	3332.9	2406.3	2	2	2	4	2	1		10438	SH3 domain-binding glutamic acid-rich-like protein 3 OS=Homo sapiens OX=9606 GN=SH3BGRL3 PE=1 SV=1
629	1223	P27216|ANX13_HUMAN	P27216	ANX13	HUMAN	76.7	7	7	7	7	7	2550.4	2322.6	19187	26868	2	1	3	3	7	9	Carbamylation	35415	Annexin A13 OS=Homo sapiens OX=9606 GN=ANXA13 PE=1 SV=3
837	1175	O00194|RB27B_HUMAN	O00194	RB27B	HUMAN	76.7	9	9	9	9	9	1890.1	1816.5	2007.1	0	2	1	4	3	3	2		24608	Ras-related protein Rab-27B OS=Homo sapiens OX=9606 GN=RAB27B PE=1 SV=4
1072	1650	O15127|SCAM2_HUMAN	O15127	SCAM2	HUMAN	76.64	8	4	4	4	0	1306.8	932.52	1037.7		2	2	2	3	2	0		36649	Secretory carrier-associated membrane protein 2 OS=Homo sapiens OX=9606 GN=SCAMP2 PE=1 SV=2
738	1048	Q9ULW8|PADI3_HUMAN	Q9ULW8	PADI3	HUMAN	76.64	5	5	3	3	3	23826	26587	45611	42777	3	1	4	4	4	4	Deamidation (NQ)	74743	Protein-arginine deiminase type-3 OS=Homo sapiens OX=9606 GN=PADI3 PE=1 SV=2
800	871	P12830|CADH1_HUMAN	P12830	CADH1	HUMAN	76.54	5	4	2	3	3	1394.1	1892.1	2138.4	3486.5	4	4	3	4	3	4	Carbamidomethylation	97456	Cadherin-1 OS=Homo sapiens OX=9606 GN=CDH1 PE=1 SV=3
935	1139	Q8NCL4|GALT6_HUMAN	Q8NCL4	GALT6	HUMAN	76.51	4	4	2	4	2	711.55	797.69	640.64	699.42	2	1	3	2	3	1	Carbamidomethylation	71159	Polypeptide N-acetylgalactosaminyltransferase 6 OS=Homo sapiens OX=9606 GN=GALNT6 PE=2 SV=2
653	1235	A0A0C4DH35|HV335_HUMAN	A0A0C4DH35	HV335	HUMAN	76.37	19	9	19	9	9	16830	1644.6	5674.1	4726	2	2	8	6	4	3	Carbamidomethylation; Carbamylation; Deamidation (NQ); Acetylation (Protein N-term)	12810	Probable non-functional immunoglobulin heavy variable 3-35 OS=Homo sapiens OX=9606 GN=IGHV3-35 PE=1 SV=1
1302	1313	Q10589|BST2_HUMAN	Q10589	BST2	HUMAN	76.36	14	14	0	6	6	1594.1		0	1013.1	2	2	2	0	1	1		19769	Bone marrow stromal antigen 2 OS=Homo sapiens OX=9606 GN=BST2 PE=1 SV=1
779	1394	Q12931|TRAP1_HUMAN	Q12931	TRAP1	HUMAN	76.36	4	2	2	2	4				0	2	1	5	2	2	5	Carbamylation	80110	Heat shock protein 75 kDa mitochondrial OS=Homo sapiens OX=9606 GN=TRAP1 PE=1 SV=3
875	967	P16150|LEUK_HUMAN	P16150	LEUK	HUMAN	76.31	14	12	12	4	2	6451.7	6302.5	4517.5	4647.8	3	3	4	3	2	2		40322	Leukosialin OS=Homo sapiens OX=9606 GN=SPN PE=1 SV=1
1043	838	P50570|DYN2_HUMAN	P50570	DYN2	HUMAN	76.28	4	3	1	1	1	0				4	2	4	1	1	1	Carbamidomethylation	98064	Dynamin-2 OS=Homo sapiens OX=9606 GN=DNM2 PE=1 SV=2
486	1011	P15814|IGLL1_HUMAN	P15814	IGLL1	HUMAN	76.22	23	14	16	14	7	12648	11095	7248.5	6835.2	3	3	9	10	11	8	Carbamidomethylation; Carbamylation; Deamidation (NQ); Oxidation (M); Acetylation (Protein N-term)	22963	Immunoglobulin lambda-like polypeptide 1 OS=Homo sapiens OX=9606 GN=IGLL1 PE=1 SV=1
1298	1683	Q96D96|HVCN1_HUMAN	Q96D96	HVCN1	HUMAN	76.01	9	3	5	5	5	675.59	0	1516.9	0	2	2	1	1	1	1		31683	Voltage-gated hydrogen channel 1 OS=Homo sapiens OX=9606 GN=HVCN1 PE=1 SV=1
1134	1034	Q9H190|SDCB2_HUMAN	Q9H190	SDCB2	HUMAN	75.84	10	3	7	3	7	926.38	1088.3	1207.6	1244.5	3	3	1	2	1	2	Carbamidomethylation	31594	Syntenin-2 OS=Homo sapiens OX=9606 GN=SDCBP2 PE=1 SV=2
1128	1075	O00182|LEG9_HUMAN	O00182	LEG9	HUMAN	75.71	9	3	3	2	9				502.72	3	1	1	1	1	3	Carbamidomethylation	39518	Galectin-9 OS=Homo sapiens OX=9606 GN=LGALS9 PE=1 SV=2
1334	1943	P06454|PTMA_HUMAN	P06454	PTMA	HUMAN	75.49	24	24	24	0	0	1887.7	1820			2	2	2	2	0	0	Acetylation (Protein N-term)	12203	Prothymosin alpha OS=Homo sapiens OX=9606 GN=PTMA PE=1 SV=2
942	1134	P49591|SYSC_HUMAN	P49591	SYSC	HUMAN	75.46	6	6	4	3	3	1779.8	992.74	692.33	729.51	3	3	3	3	2	1	Carbamidomethylation	58777	Serine--tRNA ligase cytoplasmic OS=Homo sapiens OX=9606 GN=SARS1 PE=1 SV=3
959	1131	Q00796|DHSO_HUMAN	Q00796	DHSO	HUMAN	75.24	12	7	12	3	3	866.93	1295.1	748.61	0	3	3	3	3	2	1		38325	Sorbitol dehydrogenase OS=Homo sapiens OX=9606 GN=SORD PE=1 SV=4
1584	1194	P62424|RL7A_HUMAN	P62424	RL7A	HUMAN	75.17	9	0	0	4	5			706.97	0	2	2	0	0	1	1		29996	60S ribosomal protein L7a OS=Homo sapiens OX=9606 GN=RPL7A PE=1 SV=2
1005	1013	P05186|PPBT_HUMAN	P05186	PPBT	HUMAN	75.11	9	7	6	0	3	2029	3956.9		504.21	4	4	4	3	0	1		57305	Alkaline phosphatase tissue-nonspecific isozyme OS=Homo sapiens OX=9606 GN=ALPL PE=1 SV=4
1208	1356	Q92542|NICA_HUMAN	Q92542	NICA	HUMAN	75.03	3	2	2	3	2	686.31	832.07	780.23	0	2	2	1	1	2	1		78411	Nicastrin OS=Homo sapiens OX=9606 GN=NCSTN PE=1 SV=2
1068	1037	O15498|YKT6_HUMAN	O15498	YKT6	HUMAN	75.01	16	13	4	13	12	690.1	651.74	0	1980.9	3	3	2	1	2	2		22418	Synaptobrevin homolog YKT6 OS=Homo sapiens OX=9606 GN=YKT6 PE=1 SV=1
1277	1469	P48960|AGRE5_HUMAN	P48960	AGRE5	HUMAN	75	3	2	3	0	1	0	0		0	2	2	1	2	0	1	Carbamidomethylation	91869	Adhesion G protein-coupled receptor E5 OS=Homo sapiens OX=9606 GN=ADGRE5 PE=1 SV=4
1060	931	Q9NY33|DPP3_HUMAN	Q9NY33	DPP3	HUMAN	74.96	7	3	6	0	0	1377.8	4879.8			4	4	2	5	0	0		82589	Dipeptidyl peptidase 3 OS=Homo sapiens OX=9606 GN=DPP3 PE=1 SV=2
896	942	P10301|RRAS_HUMAN	P10301	RRAS	HUMAN	74.71	22	15	3	5	7	679.17	542.27			4	2	4	5	1	1	Deamidation (NQ)	23480	Ras-related protein R-Ras OS=Homo sapiens OX=9606 GN=RRAS PE=1 SV=1
1184	998	P13861|KAP2_HUMAN	P13861	KAP2	HUMAN	74.67	8	0	0	5	6			582.7	727.67	3	3	0	0	2	3		45518	cAMP-dependent protein kinase type II-alpha regulatory subunit OS=Homo sapiens OX=9606 GN=PRKAR2A PE=1 SV=2
1466	1176	P15291|B4GT1_HUMAN	P15291	B4GT1	HUMAN	74.5	7	7	0	0	0	359.91				3	3	3	0	0	0		43920	Beta-1 4-galactosyltransferase 1 OS=Homo sapiens OX=9606 GN=B4GALT1 PE=1 SV=5
1168	1001	Q9UHR4|BI2L1_HUMAN	Q9UHR4	BI2L1	HUMAN	74.44	9	6	0	0	3	757.61			406.4	4	4	4	0	0	1	Carbamidomethylation	56883	Brain-specific angiogenesis inhibitor 1-associated protein 2-like protein 1 OS=Homo sapiens OX=9606 GN=BAIAP2L1 PE=1 SV=2
915	935	P46782|RS5_HUMAN	P46782	RS5	HUMAN	74.44	17	13	17	8	12	1388.1	2049.8	0	1459.1	3	3	2	5	1	2	Carbamidomethylation; Acetylation (Protein N-term)	22876	40S ribosomal protein S5 OS=Homo sapiens OX=9606 GN=RPS5 PE=1 SV=4
1124	1507	O95274|LYPD3_HUMAN	O95274	LYPD3	HUMAN	74.4	8	3	8	5	8	966.38	1940.5	629.87	592.4	2	2	1	2	1	2	Carbamidomethylation	35971	Ly6/PLAUR domain-containing protein 3 OS=Homo sapiens OX=9606 GN=LYPD3 PE=1 SV=2
1126	2295	Q9BY15|AGRE3_HUMAN	Q9BY15	AGRE3	HUMAN	74.26	2	2	2	2	0	1519.7	1358.3	458.87		2	2	3	2	1	0		72621	Adhesion G protein-coupled receptor E3 OS=Homo sapiens OX=9606 GN=ADGRE3 PE=2 SV=2
783	1430	P07477|TRY1_HUMAN	P07477	TRY1	HUMAN	74.18	12	4	12	12	12	2955.8	2779.8	1344.9	1012.7	2	1	2	4	4	4	Deamidation (NQ)	26558	Trypsin-1 OS=Homo sapiens OX=9606 GN=PRSS1 PE=1 SV=1
1053	929	P62753|RS6_HUMAN	P62753	RS6	HUMAN	74.14	12	3	3	8	4	0	973.04	2084.2	0	3	3	1	2	3	1		28681	40S ribosomal protein S6 OS=Homo sapiens OX=9606 GN=RPS6 PE=1 SV=1
1423	1179	P00488|F13A_HUMAN	P00488	F13A	HUMAN	74.1	4	4	0	0	0	1248.4				2	2	3	0	0	0	Carbamylation	83267	Coagulation factor XIII A chain OS=Homo sapiens OX=9606 GN=F13A1 PE=1 SV=4
1029	992	Q58FF6|H90B4_HUMAN	Q58FF6	H90B4	HUMAN	74.04	7	4	2	2	5				844.22	4	2	2	1	1	3	Carbamylation	58264	Putative heat shock protein HSP 90-beta 4 OS=Homo sapiens OX=9606 GN=HSP90AB4P PE=5 SV=1
1059	1232	O15511|ARPC5_HUMAN	O15511	ARPC5	HUMAN	73.92	18	18	8	8	8	2578.9	3340.3	2266	1303.1	2	2	2	2	1	2		16320	Actin-related protein 2/3 complex subunit 5 OS=Homo sapiens OX=9606 GN=ARPC5 PE=1 SV=3
1274	1041	Q9NZ08|ERAP1_HUMAN	Q9NZ08	ERAP1	HUMAN	73.73	4	3	2	0	0	432.88	1252.6			3	3	2	2	0	0		107235	Endoplasmic reticulum aminopeptidase 1 OS=Homo sapiens OX=9606 GN=ERAP1 PE=1 SV=3
1023	958	P62241|RS8_HUMAN	P62241	RS8	HUMAN	73.66	24	18	11	12	0	22368	1828.2	820.31		4	4	3	2	3	0	Carbamidomethylation	24205	40S ribosomal protein S8 OS=Homo sapiens OX=9606 GN=RPS8 PE=1 SV=2
1325	1952	Q9UKR0|KLK12_HUMAN	Q9UKR0	KLK12	HUMAN	73.64	8	0	0	8	0			1270.6		2	2	0	0	4	0	Carbamidomethylation	26734	Kallikrein-12 OS=Homo sapiens OX=9606 GN=KLK12 PE=1 SV=1
1299	1028	P07942|LAMB1_HUMAN	P07942	LAMB1	HUMAN	73.61	2	1	1	0	0	550.74	1299.9			3	3	2	2	0	0	Carbamidomethylation	198037	Laminin subunit beta-1 OS=Homo sapiens OX=9606 GN=LAMB1 PE=1 SV=2
1241	1500	Q9Y2E4|DIP2C_HUMAN	Q9Y2E4	DIP2C	HUMAN	73.61	1	1	1	1	0			2555.9		2	1	1	2	1	0	Carbamidomethylation	170766	Disco-interacting protein 2 homolog C OS=Homo sapiens OX=9606 GN=DIP2C PE=1 SV=2
1378	912	O43795|MYO1B_HUMAN	O43795	MYO1B	HUMAN	73.6	3	3	0	0	0	2058.8				3	3	3	0	0	0		131985	Unconventional myosin-Ib OS=Homo sapiens OX=9606 GN=MYO1B PE=1 SV=3
1161	1199	P07358|CO8B_HUMAN	P07358	CO8B	HUMAN	73.48	3	3	2	0	0	1663.1	947.01			2	2	2	3	0	0	Carbamidomethylation	67047	Complement component C8 beta chain OS=Homo sapiens OX=9606 GN=C8B PE=1 SV=3
1413	1215	Q92896|GSLG1_HUMAN	Q92896	GSLG1	HUMAN	73.38	2	0	1	0	2		0		1028.2	2	2	0	1	0	2	Carbamidomethylation	134552	Golgi apparatus protein 1 OS=Homo sapiens OX=9606 GN=GLG1 PE=1 SV=2
1188	970	P40763|STAT3_HUMAN	P40763	STAT3	HUMAN	73.35	5	1	1	2	3	895.14	481.2	275.75	1278.4	3	3	1	1	1	2		88068	Signal transducer and activator of transcription 3 OS=Homo sapiens OX=9606 GN=STAT3 PE=1 SV=2
1335	3560	Q8N339|MT1M_HUMAN	Q8N339	MT1M	HUMAN	73.33	20	20	20	20	20	0	0	0	0	1	1	1	1	1	1	Carbamidomethylation	6110	Metallothionein-1M OS=Homo sapiens OX=9606 GN=MT1M PE=1 SV=2
1335	3561	P80297|MT1X_HUMAN	P80297	MT1X	HUMAN	73.33	20	20	20	20	20	0	0	0	0	1	1	1	1	1	1	Carbamidomethylation	6068	Metallothionein-1X OS=Homo sapiens OX=9606 GN=MT1X PE=1 SV=1
1335	3562	P02795|MT2_HUMAN	P02795	MT2	HUMAN	73.33	20	20	20	20	20	0	0	0	0	1	1	1	1	1	1	Carbamidomethylation	6042	Metallothionein-2 OS=Homo sapiens OX=9606 GN=MT2A PE=1 SV=1
1335	3563	P04732|MT1E_HUMAN	P04732	MT1E	HUMAN	73.33	20	20	20	20	20	0	0	0	0	1	1	1	1	1	1	Carbamidomethylation	6014	Metallothionein-1E OS=Homo sapiens OX=9606 GN=MT1E PE=1 SV=1
1335	3564	P13640|MT1G_HUMAN	P13640	MT1G	HUMAN	73.33	19	19	19	19	19	0	0	0	0	1	1	1	1	1	1	Carbamidomethylation	6141	Metallothionein-1G OS=Homo sapiens OX=9606 GN=MT1G PE=1 SV=2
663	2080	P01718|LV327_HUMAN	P01718	LV327	HUMAN	73.24	19	10	19	10	10		1269.4			2	1	4	7	7	3	Carbamidomethylation	12165	Immunoglobulin lambda variable 3-27 OS=Homo sapiens OX=9606 GN=IGLV3-27 PE=1 SV=2
1437	1361	Q9NY25|CLC5A_HUMAN	Q9NY25	CLC5A	HUMAN	73.19	13	6	6	0	6	1006.6	645.54		0	2	2	1	1	0	1	Carbamidomethylation	21521	C-type lectin domain family 5 member A OS=Homo sapiens OX=9606 GN=CLEC5A PE=1 SV=1
1015	1387	Q92485|ASM3B_HUMAN	Q92485	ASM3B	HUMAN	73.19	6	4	6	2	2	689.9	0	1486.7	988.01	2	2	3	3	1	1	Deamidation (NQ)	50814	Acid sphingomyelinase-like phosphodiesterase 3b OS=Homo sapiens OX=9606 GN=SMPDL3B PE=1 SV=2
474	981	O76013|KRT36_HUMAN	O76013	KRT36	HUMAN	73.05	5	5	5	3	3	865.78	0		0	3	1	8	7	13	12	Carbamidomethylation; Carbamylation	52247	Keratin type I cuticular Ha6 OS=Homo sapiens OX=9606 GN=KRT36 PE=1 SV=1
795	1657	Q5SSG8|MUC21_HUMAN	Q5SSG8	MUC21	HUMAN	72.94	4	4	4	1	2	2351.1	1968.2	1254.9	497.26	2	2	4	7	2	1		54228	Mucin-21 OS=Homo sapiens OX=9606 GN=MUC21 PE=1 SV=2
1048	964	Q92747|ARC1A_HUMAN	Q92747	ARC1A	HUMAN	72.74	19	6	2	14	0	618.24	958.83	2223.4		6	5	2	1	4	0	Carbamidomethylation	41569	Actin-related protein 2/3 complex subunit 1A OS=Homo sapiens OX=9606 GN=ARPC1A PE=1 SV=2
1113	1328	A0A0B4J1Y8|LV949_HUMAN	A0A0B4J1Y8	LV949	HUMAN	72.64	16	0	16	16	8		4841.8	0	926.22	2	2	0	3	2	1		13024	Immunoglobulin lambda variable 9-49 OS=Homo sapiens OX=9606 GN=IGLV9-49 PE=1 SV=1
803	1354	O75915|PRAF3_HUMAN	O75915	PRAF3	HUMAN	72.64	11	11	11	11	11	343.09	1064	494.78	1211.4	2	2	3	4	3	4	Acetylation (Protein N-term)	21615	PRA1 family protein 3 OS=Homo sapiens OX=9606 GN=ARL6IP5 PE=1 SV=1
1137	1602	Q8TED4|G6PT3_HUMAN	Q8TED4	G6PT3	HUMAN	72.49	4	4	2	4	2	835.1	3855.7	5554.4	1956.2	2	2	2	1	2	1		54437	Glucose-6-phosphate exchanger SLC37A2 OS=Homo sapiens OX=9606 GN=SLC37A2 PE=2 SV=2
1301	1155	P13727|PRG2_HUMAN	P13727	PRG2	HUMAN	72.48	13	9	9	0	0	1777.2	931.84			3	3	2	2	0	0	Carbamidomethylation	25206	Bone marrow proteoglycan OS=Homo sapiens OX=9606 GN=PRG2 PE=1 SV=2
712	1081	P0DTE1|HV383_HUMAN	P0DTE1	HV383	HUMAN	72.43	25	25	16	6	6	2823.4	635.23			3	2	7	7	3	1	Carbamidomethylation	12671	Probable non-functional immunoglobulin heavy variable 3-38-3 OS=Homo sapiens OX=9606 GN=IGHV3-38-3 PE=1 SV=1
1058	1196	P46776|RL27A_HUMAN	P46776	RL27A	HUMAN	72.42	16	16	7	7	7	0	565.1	0	632.49	2	2	3	1	1	2	Carbamidomethylation	16561	60S ribosomal protein L27a OS=Homo sapiens OX=9606 GN=RPL27A PE=1 SV=2
928	1348	Q9H1E1|RNAS7_HUMAN	Q9H1E1	RNAS7	HUMAN	72.31	18	10	10	18	10	848.8	878.38	3100.6	1651.3	2	2	1	1	5	3	Carbamidomethylation	17419	Ribonuclease 7 OS=Homo sapiens OX=9606 GN=RNASE7 PE=1 SV=2
1199	1127	Q8IZP9|AGRG2_HUMAN	Q8IZP9	AGRG2	HUMAN	72.19	3	1	3	0	0	1117.7	2787.5			3	3	2	3	0	0		111592	Adhesion G-protein coupled receptor G2 OS=Homo sapiens OX=9606 GN=ADGRG2 PE=1 SV=2
958	930	P04196|HRG_HUMAN	P04196	HRG	HUMAN	72.02	10	6	3	4	6	2254.4	0	1498.3	640.15	4	4	3	1	3	2		59578	Histidine-rich glycoprotein OS=Homo sapiens OX=9606 GN=HRG PE=1 SV=1
651	1757	P61018|RAB4B_HUMAN	P61018	RAB4B	HUMAN	72.01	12	5	5	12	5			0		2	1	6	2	6	8	Carbamylation; Deamidation (NQ); Acetylation (Protein N-term)	23587	Ras-related protein Rab-4B OS=Homo sapiens OX=9606 GN=RAB4B PE=1 SV=1
926	1966	P62913|RL11_HUMAN	P62913	RL11	HUMAN	71.94	15	15	8	8	15	1563.2	0	1221.3	493.24	2	2	3	2	2	3	Acetylation (Protein N-term)	20252	60S ribosomal protein L11 OS=Homo sapiens OX=9606 GN=RPL11 PE=1 SV=2
1743	1481	P30046|DOPD_HUMAN	P30046	DOPD	HUMAN	71.75	19	13	0	0	7	522.92			2042.3	2	2	1	0	0	1	Carbamidomethylation	12712	D-dopachrome decarboxylase OS=Homo sapiens OX=9606 GN=DDT PE=1 SV=3
1743	2012	A6NHG4|DDTL_HUMAN	A6NHG4	DDTL	HUMAN	71.75	17	11	0	0	6	522.92			2042.3	2	2	1	0	0	1	Carbamidomethylation	14195	D-dopachrome decarboxylase-like protein OS=Homo sapiens OX=9606 GN=DDTL PE=2 SV=1
649	1358	Q6IQ22|RAB12_HUMAN	Q6IQ22	RAB12	HUMAN	71.57	8	8	5	5	5	0				2	1	7	2	5	8	Carbamylation; Deamidation (NQ); Acetylation (Protein N-term)	27248	Ras-related protein Rab-12 OS=Homo sapiens OX=9606 GN=RAB12 PE=1 SV=3
1252	1026	Q9HBA9|FOH1B_HUMAN	Q9HBA9	FOH1B	HUMAN	71.48	8	5	2	2	0	1135	915.45	546.09		3	3	2	1	1	0		50045	Putative N-acetylated-alpha-linked acidic dipeptidase OS=Homo sapiens OX=9606 GN=FOLH1B PE=2 SV=1
1252	1040	Q04609|FOLH1_HUMAN	Q04609	FOLH1	HUMAN	71.48	5	3	1	1	0	1135	915.45	546.09		3	3	2	1	1	0		84331	Glutamate carboxypeptidase 2 OS=Homo sapiens OX=9606 GN=FOLH1 PE=1 SV=1
874	882	P05091|ALDH2_HUMAN	P05091	ALDH2	HUMAN	71.41	8	5	3	5	3	466.33		0		4	2	4	2	3	2	Carbamidomethylation; Acetylation (Protein N-term)	56381	Aldehyde dehydrogenase mitochondrial OS=Homo sapiens OX=9606 GN=ALDH2 PE=1 SV=2
1312	1144	O60884|DNJA2_HUMAN	O60884	DNJA2	HUMAN	71.32	8	4	2	3	0	1678.4	0	967.89		3	3	2	1	1	0	Carbamidomethylation	45746	DnaJ homolog subfamily A member 2 OS=Homo sapiens OX=9606 GN=DNAJA2 PE=1 SV=1
929	1946	Q9NRX4|PHP14_HUMAN	Q9NRX4	PHP14	HUMAN	71.29	26	16	26	26	26	0	645.59	897.18	1125.7	2	2	1	2	3	4	Carbamidomethylation; Acetylation (Protein N-term)	13833	14 kDa phosphohistidine phosphatase OS=Homo sapiens OX=9606 GN=PHPT1 PE=1 SV=1
996	3061	Q969X1|LFG3_HUMAN	Q969X1	LFG3	HUMAN	71.06	5	5	5	5	5	4706.2	2554.5	1303.7	1733.3	2	2	2	2	1	3		34607	Protein lifeguard 3 OS=Homo sapiens OX=9606 GN=TMBIM1 PE=1 SV=2
858	1776	P13747|HLAE_HUMAN	P13747	HLAE	HUMAN	70.93	8	4	8	4	4		0			2	1	2	3	4	3	Acetylation (Protein N-term)	40058	HLA class I histocompatibility antigen alpha chain E OS=Homo sapiens OX=9606 GN=HLA-E PE=1 SV=4
1077	3565	Q14508|WFDC2_HUMAN	Q14508	WFDC2	HUMAN	70.87	11	11	11	11	11	1918.2	2119.2	700.13	0	1	1	3	1	2	1	Carbamidomethylation; Oxidation (M)	12993	WAP four-disulfide core domain protein 2 OS=Homo sapiens OX=9606 GN=WFDC2 PE=1 SV=2
455	2057	A0A0A0MRZ8|KVD11_HUMAN	A0A0A0MRZ8	KVD11	HUMAN	70.82	26	8	26	8	8	49784	45650	24958	23265	2	2	12	15	6	11	Carbamylation; Deamidation (NQ)	12625	Immunoglobulin kappa variable 3D-11 OS=Homo sapiens OX=9606 GN=IGKV3D-11 PE=3 SV=6
455	2058	P04433|KV311_HUMAN	P04433	KV311	HUMAN	70.82	26	8	26	8	8	49784	45650	24958	23265	2	2	12	15	6	11	Carbamylation; Deamidation (NQ)	12575	Immunoglobulin kappa variable 3-11 OS=Homo sapiens OX=9606 GN=IGKV3-11 PE=1 SV=1
969	1509	P50151|GBG10_HUMAN	P50151	GBG10	HUMAN	70.8	43	43	43	16	16	2260.8	1475.2	1686.5	1952.5	2	2	4	3	1	1	Carbamidomethylation; Deamidation (NQ); Acetylation (Protein N-term)	7205	Guanine nucleotide-binding protein G(I)/G(S)/G(O) subunit gamma-10 OS=Homo sapiens OX=9606 GN=GNG10 PE=1 SV=1
999	1012	P62993|GRB2_HUMAN	P62993	GRB2	HUMAN	70.6	14	11	6	10	11	1924.5	713.64	2071.3	1713.1	3	3	3	1	2	2		25206	Growth factor receptor-bound protein 2 OS=Homo sapiens OX=9606 GN=GRB2 PE=1 SV=1
955	936	P58499|FAM3B_HUMAN	P58499	FAM3B	HUMAN	70.57	14	11	11	8	4	1464.9	1118	720.34	1907	3	3	3	3	2	1	Carbamidomethylation	25982	Protein FAM3B OS=Homo sapiens OX=9606 GN=FAM3B PE=1 SV=2
1106	1486	Q9UBV8|PEF1_HUMAN	Q9UBV8	PEF1	HUMAN	70.55	7	4	4	4	7	0	1578	1979.5	1564.1	2	2	1	1	2	2		30381	Peflin OS=Homo sapiens OX=9606 GN=PEF1 PE=1 SV=1
1285	1432	P04217|A1BG_HUMAN	P04217	A1BG	HUMAN	70.37	4	2	4	0	0	696.59	1166.9			2	2	2	2	0	0	Carbamidomethylation	54254	Alpha-1B-glycoprotein OS=Homo sapiens OX=9606 GN=A1BG PE=1 SV=4
1458	1381	P29692|EF1D_HUMAN	P29692	EF1D	HUMAN	70.37	8	3	0	5	0	849.03		0		2	2	1	0	2	0		31122	Elongation factor 1-delta OS=Homo sapiens OX=9606 GN=EEF1D PE=1 SV=5
1022	3300	Q96QR1|SG3A1_HUMAN	Q96QR1	SG3A1	HUMAN	70.31	13	13	13	13	13	2329.5	2424.2	2396.6	1252.6	1	1	1	1	3	3	Carbamidomethylation	10100	Secretoglobin family 3A member 1 OS=Homo sapiens OX=9606 GN=SCGB3A1 PE=1 SV=2
906	1004	P27824|CALX_HUMAN	P27824	CALX	HUMAN	70.19	13	0	0	6	12			2993	2475.9	6	6	0	0	4	7	Carbamidomethylation	67568	Calnexin OS=Homo sapiens OX=9606 GN=CANX PE=1 SV=2
1179	965	Q96CW1|AP2M1_HUMAN	Q96CW1	AP2M1	HUMAN	70.15	8	6	4	0	0	1704.9	0			4	4	3	2	0	0	Carbamidomethylation	49655	AP-2 complex subunit mu OS=Homo sapiens OX=9606 GN=AP2M1 PE=1 SV=2
1192	2221	P01705|LV223_HUMAN	P01705	LV223	HUMAN	69.91	19	0	14	19	7		1288.5	1470.6	0	3	3	0	2	2	1	Carbamylation	11893	Immunoglobulin lambda variable 2-23 OS=Homo sapiens OX=9606 GN=IGLV2-23 PE=1 SV=2
1513	3581	P11684|UTER_HUMAN	P11684	UTER	HUMAN	69.89	12	12	0	0	0	1384.4				2	2	3	0	0	0		9994	Uteroglobin OS=Homo sapiens OX=9606 GN=SCGB1A1 PE=1 SV=1
1197	1027	P12532|KCRU_HUMAN	P12532	KCRU	HUMAN	69.71	14	14	2	2	0	1063.3	762.31	620.43		3	3	3	1	1	0		47037	Creatine kinase U-type mitochondrial OS=Homo sapiens OX=9606 GN=CKMT1A PE=1 SV=1
1489	1058	P16930|FAAA_HUMAN	P16930	FAAA	HUMAN	69.56	7	5	3	0	0	0	0			3	3	2	1	0	0		46374	Fumarylacetoacetase OS=Homo sapiens OX=9606 GN=FAH PE=1 SV=2
1728	1150	P28062|PSB8_HUMAN	P28062	PSB8	HUMAN	69.54	9	9	0	0	0	850.58				2	2	2	0	0	0		30354	Proteasome subunit beta type-8 OS=Homo sapiens OX=9606 GN=PSMB8 PE=1 SV=3
1292	1065	Q9ULZ3|ASC_HUMAN	Q9ULZ3	ASC	HUMAN	69.52	16	12	10	0	0	619.4	0			3	3	2	2	0	0		21627	Apoptosis-associated speck-like protein containing a CARD OS=Homo sapiens OX=9606 GN=PYCARD PE=1 SV=2
994	1100	P41091|IF2G_HUMAN	P41091	IF2G	HUMAN	69.47	11	6	3	3	8	334.36	0	711.5	521.77	4	4	3	1	1	3	Carbamidomethylation; Deamidation (NQ)	51110	Eukaryotic translation initiation factor 2 subunit 3 OS=Homo sapiens OX=9606 GN=EIF2S3 PE=1 SV=3
1174	1108	Q03591|FHR1_HUMAN	Q03591	FHR1	HUMAN	69.4	11	8	0	0	7	538.2			631.85	3	2	2	0	0	3	Carbamidomethylation	37651	Complement factor H-related protein 1 OS=Homo sapiens OX=9606 GN=CFHR1 PE=1 SV=2
1098	914	P11586|C1TC_HUMAN	P11586	C1TC	HUMAN	69.39	5	1	2	3	3	0	274.08	521.61	1158.2	4	4	1	1	2	2		101559	C-1-tetrahydrofolate synthase cytoplasmic OS=Homo sapiens OX=9606 GN=MTHFD1 PE=1 SV=3
1009	1200	O75608|LYPA1_HUMAN	O75608	LYPA1	HUMAN	69.31	10	10	10	10	6	1157.3	1281.8	1903.8	1186.5	2	2	2	2	3	1	Deamidation (NQ)	24670	Acyl-protein thioesterase 1 OS=Homo sapiens OX=9606 GN=LYPLA1 PE=1 SV=1
1121	1480	P62888|RL30_HUMAN	P62888	RL30	HUMAN	69.24	24	14	24	24	14	1002.9	1770.9	1716.9	996.62	2	2	1	2	2	1	Carbamidomethylation	12784	60S ribosomal protein L30 OS=Homo sapiens OX=9606 GN=RPL30 PE=1 SV=2
1770	1790	Q6UWY2|PRS57_HUMAN	Q6UWY2	PRS57	HUMAN	69.19	5	0	0	5	5			674.41	0	1	1	0	0	1	1	Carbamidomethylation	30334	Serine protease 57 OS=Homo sapiens OX=9606 GN=PRSS57 PE=1 SV=2
1070	2357	P04430|KV116_HUMAN	P04430	KV116	HUMAN	69.18	14	14	14	0	0	0	1276.1			1	1	4	3	0	0		12618	Immunoglobulin kappa variable 1-16 OS=Homo sapiens OX=9606 GN=IGKV1-16 PE=1 SV=2
1115	1241	Q96BQ1|FAM3D_HUMAN	Q96BQ1	FAM3D	HUMAN	69.17	12	12	8	8	12	1274.6	524.15	796.92	779.22	2	2	2	1	1	2	Carbamidomethylation	24963	Protein FAM3D OS=Homo sapiens OX=9606 GN=FAM3D PE=1 SV=1
1101	1425	Q9UN37|VPS4A_HUMAN	Q9UN37	VPS4A	HUMAN	69.1	5	5	3	3	3	616.58				2	1	2	1	1	2		48898	Vacuolar protein sorting-associated protein 4A OS=Homo sapiens OX=9606 GN=VPS4A PE=1 SV=1
1268	1095	O95834|EMAL2_HUMAN	O95834	EMAL2	HUMAN	68.82	8	6	1	0	0	2048.2	1107.8			4	4	4	1	0	0		70679	Echinoderm microtubule-associated protein-like 2 OS=Homo sapiens OX=9606 GN=EML2 PE=1 SV=1
1291	2254	P05204|HMGN2_HUMAN	P05204	HMGN2	HUMAN	68.81	17	17	0	0	17	11141			1308.6	1	1	3	0	0	1		9393	Non-histone chromosomal protein HMG-17 OS=Homo sapiens OX=9606 GN=HMGN2 PE=1 SV=3
1219	1459	Q9NR31|SAR1A_HUMAN	Q9NR31	SAR1A	HUMAN	68.75	10	0	6	4	6		1124.3	841.96	900.87	2	2	0	1	1	3		22367	GTP-binding protein SAR1a OS=Homo sapiens OX=9606 GN=SAR1A PE=1 SV=1
1219	1982	Q9Y6B6|SAR1B_HUMAN	Q9Y6B6	SAR1B	HUMAN	68.75	10	0	6	4	6		1124.3	841.96	900.87	2	2	0	1	1	3		22410	GTP-binding protein SAR1b OS=Homo sapiens OX=9606 GN=SAR1B PE=1 SV=1
1155	1021	O60610|DIAP1_HUMAN	O60610	DIAP1	HUMAN	68.69	5	1	0	3	0	790.84		1309.1		5	5	2	0	3	0	Carbamidomethylation	141347	Protein diaphanous homolog 1 OS=Homo sapiens OX=9606 GN=DIAPH1 PE=1 SV=2
1447	984	P49902|5NTC_HUMAN	P49902	5NTC	HUMAN	68.68	5	2	2	1	0	0	0	575.11		3	3	1	1	1	0		64970	Cytosolic purine 5'-nucleotidase OS=Homo sapiens OX=9606 GN=NT5C2 PE=1 SV=1
1436	1151	Q8N423|LIRB2_HUMAN	Q8N423	LIRB2	HUMAN	68.68	7	3	2	0	2	0	968.47		0	3	3	1	1	0	1		65039	Leukocyte immunoglobulin-like receptor subfamily B member 2 OS=Homo sapiens OX=9606 GN=LILRB2 PE=1 SV=4
1019	1664	Q9NQE9|HINT3_HUMAN	Q9NQE9	HINT3	HUMAN	68.64	11	5	11	5	11	748.34	872.78	0	600.38	2	2	1	4	1	2	Carbamidomethylation	20361	Histidine triad nucleotide-binding protein 3 OS=Homo sapiens OX=9606 GN=HINT3 PE=1 SV=1
1198	1086	P29144|TPP2_HUMAN	P29144	TPP2	HUMAN	68.48	4	2	2	1	0	1069	1011.9	568.44		3	3	2	2	1	0	Carbamidomethylation; Deamidation (NQ)	138350	Tripeptidyl-peptidase 2 OS=Homo sapiens OX=9606 GN=TPP2 PE=1 SV=4
1018	1441	P18124|RL7_HUMAN	P18124	RL7	HUMAN	68.32	9	4	4	4	9	0	0	0	351.97	2	2	2	2	1	3	Deamidation (NQ)	29226	60S ribosomal protein L7 OS=Homo sapiens OX=9606 GN=RPL7 PE=1 SV=1
1078	3583	Q9H1C7|CYTM1_HUMAN	Q9H1C7	CYTM1	HUMAN	68.31	11	11	11	11	10	3370.8	2783.2	0	0	2	2	2	3	1	1		10631	Cysteine-rich and transmembrane domain-containing protein 1 OS=Homo sapiens OX=9606 GN=CYSTM1 PE=1 SV=1
925	1085	P48059|LIMS1_HUMAN	P48059	LIMS1	HUMAN	68.3	10	7	3	7	7	0	633.36	629.39	666.99	3	3	2	2	2	4	Carbamidomethylation; Acetylation (Protein N-term)	37251	LIM and senescent cell antigen-like-containing domain protein 1 OS=Homo sapiens OX=9606 GN=LIMS1 PE=1 SV=4
1065	1423	P62280|RS11_HUMAN	P62280	RS11	HUMAN	68.28	12	5	7	12	5	0	838.3	2098.4	1000.6	2	2	1	3	2	1		18431	40S ribosomal protein S11 OS=Homo sapiens OX=9606 GN=RPS11 PE=1 SV=3
992	999	P61421|VA0D1_HUMAN	P61421	VA0D1	HUMAN	68.17	9	3	9	4	4	688.75	2169.3	0	0	3	3	2	4	1	1		40329	V-type proton ATPase subunit d 1 OS=Homo sapiens OX=9606 GN=ATP6V0D1 PE=1 SV=1
1224	1105	P61313|RL15_HUMAN	P61313	RL15	HUMAN	68.16	18	4	0	7	11	0		0	640.21	4	4	1	0	2	2		24146	60S ribosomal protein L15 OS=Homo sapiens OX=9606 GN=RPL15 PE=1 SV=2
1013	1542	P08519|APOA_HUMAN	P08519	APOA	HUMAN	68.16	1	1	1	1	0	1097.2	1730	1023.8	0	2	2	3	2	2	1	Carbamidomethylation	501323	Apolipoprotein(a) OS=Homo sapiens OX=9606 GN=LPA PE=1 SV=1
1256	1305	Q96EY5|MB12A_HUMAN	Q96EY5	MB12A	HUMAN	67.97	15	5	10	10	0	828.41	874.77	307.95		2	2	1	2	1	0	Acetylation (Protein N-term)	28783	Multivesicular body subunit 12A OS=Homo sapiens OX=9606 GN=MVB12A PE=1 SV=1
1135	1111	P12268|IMDH2_HUMAN	P12268	IMDH2	HUMAN	67.9	6	6	2	0	4	2986.9	0		1036.8	3	3	3	1	0	2		55805	Inosine-5'-monophosphate dehydrogenase 2 OS=Homo sapiens OX=9606 GN=IMPDH2 PE=1 SV=2
1074	3566	P02812|PRB2_HUMAN	P02812	PRB2	HUMAN	67.51	5	5	5	0	0	4621.9	2670.8			1	1	5	2	0	0	Carbamylation; Deamidation (NQ)	40799	Basic salivary proline-rich protein 2 OS=Homo sapiens OX=9606 GN=PRB2 PE=1 SV=3
1616	1159	P16885|PLCG2_HUMAN	P16885	PLCG2	HUMAN	67.47	2	1	1	1	0	0	482.65	0		2	2	1	1	1	0		147870	1-phosphatidylinositol 4 5-bisphosphate phosphodiesterase gamma-2 OS=Homo sapiens OX=9606 GN=PLCG2 PE=1 SV=4
1073	1718	Q15257|PTPA_HUMAN	Q15257	PTPA	HUMAN	67.4	6	3	6	4	4	913.72	492.35	913.73	0	2	2	1	3	2	1		40668	Serine/threonine-protein phosphatase 2A activator OS=Homo sapiens OX=9606 GN=PTPA PE=1 SV=3
916	1226	Q5VW32|BROX_HUMAN	Q5VW32	BROX	HUMAN	67.38	4	4	4	4	4	749.77	836.18	1220.2	1772.9	2	2	2	3	2	3		46476	BRO1 domain-containing protein BROX OS=Homo sapiens OX=9606 GN=BROX PE=1 SV=1
1057	1024	P68036|UB2L3_HUMAN	P68036	UB2L3	HUMAN	67.3	27	23	10	6	6	1327.3	730.33	0	681.56	4	4	3	2	1	1		17862	Ubiquitin-conjugating enzyme E2 L3 OS=Homo sapiens OX=9606 GN=UBE2L3 PE=1 SV=1
1119	1088	P21128|ENDOU_HUMAN	P21128	ENDOU	HUMAN	67.28	11	11	8	0	0	2346.1	1324.1			3	3	4	2	0	0	Carbamidomethylation	46872	Poly(U)-specific endoribonuclease OS=Homo sapiens OX=9606 GN=ENDOU PE=1 SV=2
1290	1725	Q8IVI9|NOSTN_HUMAN	Q8IVI9	NOSTN	HUMAN	67.15	7	5	5	0	2	347.84	324.4		0	2	2	1	2	0	1		57660	Nostrin OS=Homo sapiens OX=9606 GN=NOSTRIN PE=1 SV=2
1474	1973	Q15691|MARE1_HUMAN	Q15691	MARE1	HUMAN	67.12	11	11	0	0	0	0				2	2	3	0	0	0		29999	Microtubule-associated protein RP/EB family member 1 OS=Homo sapiens OX=9606 GN=MAPRE1 PE=1 SV=3
968	1266	P55957|BID_HUMAN	P55957	BID	HUMAN	67.11	12	12	12	12	0	1031.8	1956.2	719.73		2	2	4	2	3	0		21995	BH3-interacting domain death agonist OS=Homo sapiens OX=9606 GN=BID PE=1 SV=1
1300	1104	Q14002|CEAM7_HUMAN	Q14002	CEAM7	HUMAN	67.07	14	10	3	0	4	1898.4	1301.3		812.34	3	3	2	1	0	1	Carbamidomethylation	29379	Carcinoembryonic antigen-related cell adhesion molecule 7 OS=Homo sapiens OX=9606 GN=CEACAM7 PE=1 SV=1
1123	1326	P62249|RS16_HUMAN	P62249	RS16	HUMAN	67	12	7	7	5	5	407.81	437.51	987.15	667.53	2	2	2	2	1	1		16445	40S ribosomal protein S16 OS=Homo sapiens OX=9606 GN=RPS16 PE=1 SV=2
993	1063	P25685|DNJB1_HUMAN	P25685	DNJB1	HUMAN	66.86	13	8	5	3	5	907.5	0	839.14	530.52	3	3	5	1	1	1	Carbamidomethylation; Deamidation (NQ)	38044	DnaJ homolog subfamily B member 1 OS=Homo sapiens OX=9606 GN=DNAJB1 PE=1 SV=4
1044	1002	Q15181|IPYR_HUMAN	Q15181	IPYR	HUMAN	66.77	11	8	11	3	0	770.99	665.17	0		3	3	2	4	1	0	Carbamidomethylation	32660	Inorganic pyrophosphatase OS=Homo sapiens OX=9606 GN=PPA1 PE=1 SV=2
1182	963	P08697|A2AP_HUMAN	P08697	A2AP	HUMAN	66.74	6	2	5	3	1	0	1771.3	533.55	792.59	3	3	1	2	1	1	Carbamidomethylation	54566	Alpha-2-antiplasmin OS=Homo sapiens OX=9606 GN=SERPINF2 PE=1 SV=3
1093	1132	Q05193|DYN1_HUMAN	Q05193	DYN1	HUMAN	66.56	4	1	1	2	1			952.4		3	1	2	1	2	1	Deamidation (NQ); Acetylation (Protein N-term)	97408	Dynamin-1 OS=Homo sapiens OX=9606 GN=DNM1 PE=1 SV=2
737	2201	Q8N1A0|KT222_HUMAN	Q8N1A0	KT222	HUMAN	66.54	4	4	4	3	3	33547	28303			2	1	3	5	4	4	Carbamylation; Acetylation (Protein N-term)	34158	Keratin-like protein KRT222 OS=Homo sapiens OX=9606 GN=KRT222 PE=1 SV=1
1313	1466	P31944|CASPE_HUMAN	P31944	CASPE	HUMAN	66.51	9	5	0	5	9	0		568.18	1788.9	3	3	1	0	1	2		27680	Caspase-14 OS=Homo sapiens OX=9606 GN=CASP14 PE=1 SV=2
1194	1154	P05156|CFAI_HUMAN	P05156	CFAI	HUMAN	66.45	7	0	4	5	3		658.44	872.23	0	3	3	0	2	2	1	Carbamidomethylation	65750	Complement factor I OS=Homo sapiens OX=9606 GN=CFI PE=1 SV=2
643	3567	P01593|KVD33_HUMAN	P01593	KVD33	HUMAN	66.38	14	14	14	14	14	4075.6	3885.6	2126.3	2485.6	1	1	6	7	3	6	Carbamylation	12848	Immunoglobulin kappa variable 1D-33 OS=Homo sapiens OX=9606 GN=IGKV1D-33 PE=1 SV=2
643	3568	P01594|KV133_HUMAN	P01594	KV133	HUMAN	66.38	14	14	14	14	14	4075.6	3885.6	2126.3	2485.6	1	1	6	7	3	6	Carbamylation	12848	Immunoglobulin kappa variable 1-33 OS=Homo sapiens OX=9606 GN=IGKV1-33 PE=1 SV=2
891	1181	Q8TAV4|STML3_HUMAN	Q8TAV4	STML3	HUMAN	66.2	7	7	2	7	7	6715.8		685.58	4358.2	2	1	2	1	3	5	Carbamylation; Deamidation (NQ)	32135	Stomatin-like protein 3 OS=Homo sapiens OX=9606 GN=STOML3 PE=1 SV=1
1117	1147	Q9UL46|PSME2_HUMAN	Q9UL46	PSME2	HUMAN	66.18	13	9	3	3	0	2143.7	0	543.3		3	3	4	1	1	0		27402	Proteasome activator complex subunit 2 OS=Homo sapiens OX=9606 GN=PSME2 PE=1 SV=4
1189	1162	P25098|ARBK1_HUMAN	P25098	ARBK1	HUMAN	66.06	4	2	1	1	1	501.88	526.44	456.08	0	3	3	2	1	1	1		79574	Beta-adrenergic receptor kinase 1 OS=Homo sapiens OX=9606 GN=GRK2 PE=1 SV=2
818	1538	Q14004|CDK13_HUMAN	Q14004	CDK13	HUMAN	65.73	1	1	1	1	1				337.14	2	1	2	3	4	4		164922	Cyclin-dependent kinase 13 OS=Homo sapiens OX=9606 GN=CDK13 PE=1 SV=2
983	1612	Q8NHM4|TRY6_HUMAN	Q8NHM4	TRY6	HUMAN	65.56	13	0	13	8	8		0			2	1	0	3	3	2	Carbamylation; Deamidation (NQ)	26537	Putative trypsin-6 OS=Homo sapiens OX=9606 GN=PRSS3P2 PE=5 SV=2
1173	1090	Q13488|VPP3_HUMAN	Q13488	VPP3	HUMAN	65.48	4	3	0	2	1	709.06		1634.7	815.24	3	3	2	0	2	1		92968	V-type proton ATPase 116 kDa subunit a3 OS=Homo sapiens OX=9606 GN=TCIRG1 PE=1 SV=3
1715	1653	P46926|GNPI1_HUMAN	P46926	GNPI1	HUMAN	65.35	7	3	3	0	0	947.47	512.03			2	2	1	1	0	0		32669	Glucosamine-6-phosphate isomerase 1 OS=Homo sapiens OX=9606 GN=GNPDA1 PE=1 SV=1
1297	1574	P34896|GLYC_HUMAN	P34896	GLYC	HUMAN	65.01	5	3	2	2	2	0	847.42	0	783.67	2	2	1	1	1	1	Carbamidomethylation	53083	Serine hydroxymethyltransferase cytosolic OS=Homo sapiens OX=9606 GN=SHMT1 PE=1 SV=1
1304	1353	P36543|VATE1_HUMAN	P36543	VATE1	HUMAN	64.98	11	5	11	6	0	1095.7	1002.1	0		2	2	1	2	1	0		26145	V-type proton ATPase subunit E 1 OS=Homo sapiens OX=9606 GN=ATP6V1E1 PE=1 SV=1
789	3218	P01602|KV105_HUMAN	P01602	KV105	HUMAN	64.86	14	9	14	14	14	15194	14901	33377	8651.4	2	2	1	2	5	6	Carbamylation; Acetylation (Protein N-term)	12782	Immunoglobulin kappa variable 1-5 OS=Homo sapiens OX=9606 GN=IGKV1-5 PE=1 SV=2
1426	1287	Q96P48|ARAP1_HUMAN	Q96P48	ARAP1	HUMAN	64.6	2	2	0	1	0	382.35		557.88		2	2	2	0	1	0	Acetylation (Protein N-term)	162191	Arf-GAP with Rho-GAP domain ANK repeat and PH domain-containing protein 1 OS=Homo sapiens OX=9606 GN=ARAP1 PE=1 SV=3
1404	1153	Q13838|DX39B_HUMAN	Q13838	DX39B	HUMAN	64.54	8	2	4	0	2	569.22	0		736.88	3	3	1	1	0	1		48991	Spliceosome RNA helicase DDX39B OS=Homo sapiens OX=9606 GN=DDX39B PE=1 SV=1
1388	1136	Q92835|SHIP1_HUMAN	Q92835	SHIP1	HUMAN	64.54	2	1	0	2	0	0		716.89		3	3	1	0	2	0	Carbamidomethylation	133292	Phosphatidylinositol 3 4 5-trisphosphate 5-phosphatase 1 OS=Homo sapiens OX=9606 GN=INPP5D PE=1 SV=2
1175	1115	P62269|RS18_HUMAN	P62269	RS18	HUMAN	64.16	21	7	0	14	13	0		905.7	2611.1	3	3	1	0	2	2	Deamidation (NQ)	17719	40S ribosomal protein S18 OS=Homo sapiens OX=9606 GN=RPS18 PE=1 SV=3
1064	1166	P62851|RS25_HUMAN	P62851	RS25	HUMAN	64.08	15	15	15	7	15	2288.6	815.29	1828.9	2603.4	2	2	2	2	1	2		13742	40S ribosomal protein S25 OS=Homo sapiens OX=9606 GN=RPS25 PE=1 SV=1
1460	1478	Q9P258|RCC2_HUMAN	Q9P258	RCC2	HUMAN	63.96	6	6	0	0	0	0				2	2	3	0	0	0	Carbamidomethylation	56085	Protein RCC2 OS=Homo sapiens OX=9606 GN=RCC2 PE=1 SV=2
914	1443	P49411|EFTU_HUMAN	P49411	EFTU	HUMAN	63.93	4	4	4	4	4	8958.2	9549.7	9456	2289.3	2	2	2	2	4	2		49542	Elongation factor Tu mitochondrial OS=Homo sapiens OX=9606 GN=TUFM PE=1 SV=2
1138	1706	P07203|GPX1_HUMAN	P07203	GPX1	HUMAN	63.83	14	14	9	9	14	1219.3	344.79	278.89	351.07	2	2	2	1	1	2		22088	Glutathione peroxidase 1 OS=Homo sapiens OX=9606 GN=GPX1 PE=1 SV=4
1260	1570	Q08209|PP2BA_HUMAN	Q08209	PP2BA	HUMAN	63.75	4	0	0	4	4			2152.3	1876.7	2	2	0	0	2	2		58688	Serine/threonine-protein phosphatase 2B catalytic subunit alpha isoform OS=Homo sapiens OX=9606 GN=PPP3CA PE=1 SV=1
1041	941	P04843|RPN1_HUMAN	P04843	RPN1	HUMAN	63.72	7	0	2	5	6		510.69	2128.8	1100.9	4	4	0	1	3	3		68569	Dolichyl-diphosphooligosaccharide--protein glycosyltransferase subunit 1 OS=Homo sapiens OX=9606 GN=RPN1 PE=1 SV=1
1176	1161	P19367|HXK1_HUMAN	P19367	HXK1	HUMAN	63.67	2	1	1	2	1			655.17		2	1	1	1	2	1		102486	Hexokinase-1 OS=Homo sapiens OX=9606 GN=HK1 PE=1 SV=3
1071	1137	Q14116|IL18_HUMAN	Q14116	IL18	HUMAN	63.53	17	0	12	13	13		1654	2364.2	991.71	3	3	0	2	2	3	Carbamidomethylation; Acetylation (Protein N-term)	22326	Interleukin-18 OS=Homo sapiens OX=9606 GN=IL18 PE=1 SV=1
1271	1312	O60763|USO1_HUMAN	O60763	USO1	HUMAN	63.48	4	0	4	2	0		540.09	0		2	2	0	2	2	0	Carbamidomethylation; Deamidation (NQ)	107895	General vesicular transport factor p115 OS=Homo sapiens OX=9606 GN=USO1 PE=1 SV=2
1253	1165	O95479|G6PE_HUMAN	O95479	G6PE	HUMAN	63.45	4	1	3	0	1	1187.2	0		0	3	3	1	2	0	1		88893	GDH/6PGL endoplasmic bifunctional protein OS=Homo sapiens OX=9606 GN=H6PD PE=1 SV=2
1223	3570	Q9NRR8|C42S1_HUMAN	Q9NRR8	C42S1	HUMAN	63.3	15	15	15	0	15	980.45	1287.3		678.11	1	1	2	2	0	1	Carbamidomethylation	8925	CDC42 small effector protein 1 OS=Homo sapiens OX=9606 GN=CDC42SE1 PE=1 SV=1
1645	1184	Q9ULC6|PADI1_HUMAN	Q9ULC6	PADI1	HUMAN	63.18	3	2	2	0	0		527.7			2	1	1	1	0	0	Carbamidomethylation	74666	Protein-arginine deiminase type-1 OS=Homo sapiens OX=9606 GN=PADI1 PE=1 SV=2
1472	1742	O00592|PODXL_HUMAN	O00592	PODXL	HUMAN	63	4	0	2	2	0		0	630.59		2	2	0	2	1	0	Carbamidomethylation	58635	Podocalyxin OS=Homo sapiens OX=9606 GN=PODXL PE=1 SV=2
1075	2024	A0A0B4J1V2|HV226_HUMAN	A0A0B4J1V2	HV226	HUMAN	62.92	24	6	24	0	0	2168.5	2770.6			2	2	4	3	0	0	Carbamidomethylation	13182	Immunoglobulin heavy variable 2-26 OS=Homo sapiens OX=9606 GN=IGHV2-26 PE=3 SV=1
1007	1066	P31995|FCG2C_HUMAN	P31995	FCG2C	HUMAN	62.71	8	3	8	2	2	773.84	2080.5	507.42	658.28	3	3	1	4	1	2	Deamidation (NQ)	35578	Low affinity immunoglobulin gamma Fc region receptor II-c OS=Homo sapiens OX=9606 GN=FCGR2C PE=1 SV=1
1007	1074	P12318|FCG2A_HUMAN	P12318	FCG2A	HUMAN	62.71	9	3	9	3	3	773.84	2080.5	507.42	658.28	3	3	1	4	1	2	Deamidation (NQ)	35001	Low affinity immunoglobulin gamma Fc region receptor II-a OS=Homo sapiens OX=9606 GN=FCGR2A PE=1 SV=4
1278	1491	Q13554|KCC2B_HUMAN	Q13554	KCC2B	HUMAN	62.53	4	4	2	0	0	706.37	424.68			2	1	3	1	0	0		72678	Calcium/calmodulin-dependent protein kinase type II subunit beta OS=Homo sapiens OX=9606 GN=CAMK2B PE=1 SV=3
1278	1682	Q13555|KCC2G_HUMAN	Q13555	KCC2G	HUMAN	62.53	4	4	2	0	0	706.37	424.68			2	1	3	1	0	0		62607	Calcium/calmodulin-dependent protein kinase type II subunit gamma OS=Homo sapiens OX=9606 GN=CAMK2G PE=1 SV=4
758	2826	Q9UBD6|RHCG_HUMAN	Q9UBD6	RHCG	HUMAN	62.45	4	0	4	4	4		728.82	1725.7	2357.1	1	1	0	3	7	6	Deamidation (NQ)	53179	Ammonium transporter Rh type C OS=Homo sapiens OX=9606 GN=RHCG PE=1 SV=1
401	1633	A0A0B4J1U7|HV601_HUMAN	A0A0B4J1U7	HV601	HUMAN	62.36	13	13	13	13	13	45219	33712	19482	16114	2	2	17	20	8	7	Carbamylation	13481	Immunoglobulin heavy variable 6-1 OS=Homo sapiens OX=9606 GN=IGHV6-1 PE=3 SV=1
1157	921	P35573|GDE_HUMAN	P35573	GDE	HUMAN	62.26	2	2	0	0	1	1023.7			1608.4	3	3	4	0	0	1	Deamidation (NQ)	174763	Glycogen debranching enzyme OS=Homo sapiens OX=9606 GN=AGL PE=1 SV=3
1475	2081	P58062|ISK7_HUMAN	P58062	ISK7	HUMAN	61.88	20	0	9	11	11		1621.6	1158.9	0	2	2	0	1	1	1	Carbamidomethylation	9232	Serine protease inhibitor Kazal-type 7 OS=Homo sapiens OX=9606 GN=SPINK7 PE=1 SV=1
1220	1688	Q9UJ68|MSRA_HUMAN	Q9UJ68	MSRA	HUMAN	61.72	12	12	0	6	6	1124.7		0	0	2	2	3	0	1	1		26132	Mitochondrial peptide methionine sulfoxide reductase OS=Homo sapiens OX=9606 GN=MSRA PE=1 SV=1
1469	1323	Q8N9N7|LRC57_HUMAN	Q8N9N7	LRC57	HUMAN	61.66	9	9	4	0	0	1133.4	0			2	2	2	1	0	0		26754	Leucine-rich repeat-containing protein 57 OS=Homo sapiens OX=9606 GN=LRRC57 PE=1 SV=1
1318	1690	P08294|SODE_HUMAN	P08294	SODE	HUMAN	61.66	9	3	9	0	0	846	1680.7			2	2	1	3	0	0		25851	Extracellular superoxide dismutase [Cu-Zn] OS=Homo sapiens OX=9606 GN=SOD3 PE=1 SV=2
746	1494	P26010|ITB7_HUMAN	P26010	ITB7	HUMAN	61.6	3	1	3	1	1		1064.4			2	1	6	5	4	1		86903	Integrin beta-7 OS=Homo sapiens OX=9606 GN=ITGB7 PE=1 SV=1
1637	1290	Q13510|ASAH1_HUMAN	Q13510	ASAH1	HUMAN	61.55	5	3	0	3	0	982.12		0		2	2	1	0	1	0		44660	Acid ceramidase OS=Homo sapiens OX=9606 GN=ASAH1 PE=1 SV=5
979	1143	Q02790|FKBP4_HUMAN	Q02790	FKBP4	HUMAN	61.52	8	0	0	8	4			1683	0	3	3	0	0	6	2	Carbamidomethylation	51805	Peptidyl-prolyl cis-trans isomerase FKBP4 OS=Homo sapiens OX=9606 GN=FKBP4 PE=1 SV=3
1428	1496	P51692|STA5B_HUMAN	P51692	STA5B	HUMAN	61.49	3	3	0	0	0	1269.7				2	2	3	0	0	0	Carbamidomethylation	89866	Signal transducer and activator of transcription 5B OS=Homo sapiens OX=9606 GN=STAT5B PE=1 SV=2
1000	1393	P62760|VISL1_HUMAN	P62760	VISL1	HUMAN	61.45	12	12	12	6	12	985.73	1292.6	839.69	0	2	2	2	2	1	3		22142	Visinin-like protein 1 OS=Homo sapiens OX=9606 GN=VSNL1 PE=1 SV=2
1508	3278	Q99436|PSB7_HUMAN	Q99436	PSB7	HUMAN	61.45	5	5	5	5	0	653.03	775.85	0		1	1	1	1	1	0	Carbamidomethylation	29965	Proteasome subunit beta type-7 OS=Homo sapiens OX=9606 GN=PSMB7 PE=1 SV=1
1406	1405	P09914|IFIT1_HUMAN	P09914	IFIT1	HUMAN	61.44	4	0	2	2	2		489.62	1028	569.26	2	2	0	1	1	1		55360	Interferon-induced protein with tetratricopeptide repeats 1 OS=Homo sapiens OX=9606 GN=IFIT1 PE=1 SV=2
1221	2213	P00403|COX2_HUMAN	P00403	COX2	HUMAN	61.36	7	7	4	4	0	1676.8	0	737.59		2	2	2	1	2	0		25565	Cytochrome c oxidase subunit 2 OS=Homo sapiens OX=9606 GN=MT-CO2 PE=1 SV=1
1286	1453	P35613|BASI_HUMAN	P35613	BASI	HUMAN	61.23	6	0	6	2	4		1456.2	1377.9	542.35	2	2	0	2	1	1		42200	Basigin OS=Homo sapiens OX=9606 GN=BSG PE=1 SV=2
1181	1240	P57735|RAB25_HUMAN	P57735	RAB25	HUMAN	61.2	9	5	5	9	0	1006.3	816.4	764.95		2	1	1	1	3	0		23496	Ras-related protein Rab-25 OS=Homo sapiens OX=9606 GN=RAB25 PE=1 SV=2
366	3572	P02814|SMR3B_HUMAN	P02814	SMR3B	HUMAN	61.12	27	27	27	27	27	4083	5151	4475.1	3808.1	1	1	23	17	15	7	Carbamylation; Deamidation (NQ)	8188	Submaxillary gland androgen-regulated protein 3B OS=Homo sapiens OX=9606 GN=SMR3B PE=1 SV=2
1281	969	P25786|PSA1_HUMAN	P25786	PSA1	HUMAN	61.09	16	13	3	0	0	1727.5	800.41			4	4	3	1	0	0	Carbamidomethylation	29556	Proteasome subunit alpha type-1 OS=Homo sapiens OX=9606 GN=PSMA1 PE=1 SV=1
792	1097	P14136|GFAP_HUMAN	P14136	GFAP	HUMAN	60.95	8	2	2	4	8				564.95	3	1	1	2	7	4	Carbamylation; Deamidation (NQ)	49880	Glial fibrillary acidic protein OS=Homo sapiens OX=9606 GN=GFAP PE=1 SV=1
1307	1649	P45880|VDAC2_HUMAN	P45880	VDAC2	HUMAN	60.85	7	0	3	4	4		913.89	973.15	360.17	2	2	0	1	1	2	Deamidation (NQ)	31567	Voltage-dependent anion-selective channel protein 2 OS=Homo sapiens OX=9606 GN=VDAC2 PE=1 SV=2
1383	1207	Q9NRD8|DUOX2_HUMAN	Q9NRD8	DUOX2	HUMAN	60.78	1	1	1	0	0	725.92				2	1	2	1	0	0	Carbamidomethylation	175363	Dual oxidase 2 OS=Homo sapiens OX=9606 GN=DUOX2 PE=1 SV=2
1170	1248	Q13443|ADAM9_HUMAN	Q13443	ADAM9	HUMAN	60.68	3	1	1	3	0	826.15	872.32	1001		2	2	2	1	2	0	Carbamidomethylation	90556	Disintegrin and metalloproteinase domain-containing protein 9 OS=Homo sapiens OX=9606 GN=ADAM9 PE=1 SV=1
884	1071	P51993|FUT6_HUMAN	P51993	FUT6	HUMAN	60.64	11	11	11	6	0	4251.7	2475.2	1375.8		3	3	4	4	3	0		41860	4-galactosyl-N-acetylglucosaminide 3-alpha-L-fucosyltransferase FUT6 OS=Homo sapiens OX=9606 GN=FUT6 PE=1 SV=1
1491	1497	P36578|RL4_HUMAN	P36578	RL4	HUMAN	60.55	5	3	3	0	3	503.27	676.01		768.73	2	2	1	1	0	1	Carbamidomethylation	47697	60S ribosomal protein L4 OS=Homo sapiens OX=9606 GN=RPL4 PE=1 SV=5
1768	1597	Q969P0|IGSF8_HUMAN	Q969P0	IGSF8	HUMAN	60.27	4	4	0	0	0	372.42				2	2	2	0	0	0		65034	Immunoglobulin superfamily member 8 OS=Homo sapiens OX=9606 GN=IGSF8 PE=1 SV=1
1049	1270	Q00325|MPCP_HUMAN	Q00325	MPCP	HUMAN	60.27	5	3	3	3	5	0	1157.4	0	1168.1	2	2	2	2	1	2		40095	Phosphate carrier protein mitochondrial OS=Homo sapiens OX=9606 GN=SLC25A3 PE=1 SV=2
1207	1146	O43396|TXNL1_HUMAN	O43396	TXNL1	HUMAN	60.17	15	10	0	5	0	568.66		518.43		3	3	4	0	1	0		32251	Thioredoxin-like protein 1 OS=Homo sapiens OX=9606 GN=TXNL1 PE=1 SV=3
1129	1189	Q9NTK5|OLA1_HUMAN	Q9NTK5	OLA1	HUMAN	59.93	9	5	3	4	3	1357.3	886.74	0	0	3	3	3	1	1	1	Carbamidomethylation	44744	Obg-like ATPase 1 OS=Homo sapiens OX=9606 GN=OLA1 PE=1 SV=2
1109	1124	Q9BXI6|TB10A_HUMAN	Q9BXI6	TB10A	HUMAN	59.75	6	2	4	2	0	671.51	0	4289.3		3	3	2	3	1	0	Carbamidomethylation	57118	TBC1 domain family member 10A OS=Homo sapiens OX=9606 GN=TBC1D10A PE=1 SV=1
1440	1520	P49773|HINT1_HUMAN	P49773	HINT1	HUMAN	59.74	17	17	0	0	6	889.77			861.55	2	2	2	0	0	1		13802	Histidine triad nucleotide-binding protein 1 OS=Homo sapiens OX=9606 GN=HINT1 PE=1 SV=2
1282	1145	P01911|DRB_HUMAN	P01911	DRB	HUMAN	59.6	12	12	0	0	3	933.31			0	3	2	3	0	0	1		29966	HLA class II histocompatibility antigen DRB1 beta chain OS=Homo sapiens OX=9606 GN=HLA-DRB1 PE=1 SV=2
1314	1621	Q13410|BT1A1_HUMAN	Q13410	BT1A1	HUMAN	59.57	4	0	0	2	4			1028.6	730.11	2	2	0	0	2	2	Carbamidomethylation	58960	Butyrophilin subfamily 1 member A1 OS=Homo sapiens OX=9606 GN=BTN1A1 PE=1 SV=3
1465	1125	O43488|ARK72_HUMAN	O43488	ARK72	HUMAN	59.46	13	5	3	4	0	0	0	0		3	3	1	1	1	0		39589	Aflatoxin B1 aldehyde reductase member 2 OS=Homo sapiens OX=9606 GN=AKR7A2 PE=1 SV=3
1403	1141	Q6ZMR5|TM11A_HUMAN	Q6ZMR5	TM11A	HUMAN	59.31	7	0	3	2	2		0	0	0	3	3	0	1	1	1		47569	Transmembrane protease serine 11A OS=Homo sapiens OX=9606 GN=TMPRSS11A PE=1 SV=1
1429	1584	P39023|RL3_HUMAN	P39023	RL3	HUMAN	59.22	8	5	3	3	0	0	650.8	0		2	2	1	1	1	0	Carbamylation; Deamidation (NQ); Oxidation (M)	46109	60S ribosomal protein L3 OS=Homo sapiens OX=9606 GN=RPL3 PE=1 SV=2
1422	1110	Q12906|ILF3_HUMAN	Q12906	ILF3	HUMAN	59.22	5	2	3	0	0	481.09	3794.4			3	3	1	2	0	0		95339	Interleukin enhancer-binding factor 3 OS=Homo sapiens OX=9606 GN=ILF3 PE=1 SV=3
1051	1792	Q9Y394|DHRS7_HUMAN	Q9Y394	DHRS7	HUMAN	59.21	7	0	4	7	7		0	3171.8	0	2	2	0	1	4	2	Deamidation (NQ)	38299	Dehydrogenase/reductase SDR family member 7 OS=Homo sapiens OX=9606 GN=DHRS7 PE=1 SV=1
893	3349	P01703|LV140_HUMAN	P01703	LV140	HUMAN	59.11	14	14	14	14	14	4723.2	2667.1	1250.4	1156.4	1	1	3	3	2	3		12302	Immunoglobulin lambda variable 1-40 OS=Homo sapiens OX=9606 GN=IGLV1-40 PE=1 SV=2
1131	1362	Q16539|MK14_HUMAN	Q16539	MK14	HUMAN	59.04	5	2	2	2	5				678.46	2	1	2	1	1	2		41293	Mitogen-activated protein kinase 14 OS=Homo sapiens OX=9606 GN=MAPK14 PE=1 SV=3
1185	1089	Q16543|CDC37_HUMAN	Q16543	CDC37	HUMAN	59	11	0	11	3	0		9394.2	0		4	4	0	4	1	0		44468	Hsp90 co-chaperone Cdc37 OS=Homo sapiens OX=9606 GN=CDC37 PE=1 SV=1
1084	1043	P02452|CO1A1_HUMAN	P02452	CO1A1	HUMAN	58.66	3	2	2	0	0	7704.7	11628			4	4	2	4	0	0	Carbamylation; Oxidation (M)	138942	Collagen alpha-1(I) chain OS=Homo sapiens OX=9606 GN=COL1A1 PE=1 SV=5
1217	1813	Q6IBS0|TWF2_HUMAN	Q6IBS0	TWF2	HUMAN	58.65	7	7	7	0	0	598.95	441.9			2	1	3	2	0	0	Carbamidomethylation	39548	Twinfilin-2 OS=Homo sapiens OX=9606 GN=TWF2 PE=1 SV=2
1218	1980	P25090|FPR2_HUMAN	P25090	FPR2	HUMAN	58.48	3	3	3	0	3	2133.5	1298.7		630.17	1	1	3	1	0	1		38964	N-formyl peptide receptor 2 OS=Homo sapiens OX=9606 GN=FPR2 PE=1 SV=2
1273	1844	Q9UMR7|CLC4A_HUMAN	Q9UMR7	CLC4A	HUMAN	58.44	11	0	6	5	5		312.06	1045.4	1191.4	2	2	0	2	1	1	Carbamidomethylation; Oxidation (M)	27512	C-type lectin domain family 4 member A OS=Homo sapiens OX=9606 GN=CLEC4A PE=1 SV=1
1656	1379	P01133|EGF_HUMAN	P01133	EGF	HUMAN	58.25	2	2	0	0	0	609.42				2	2	2	0	0	0		133994	Pro-epidermal growth factor OS=Homo sapiens OX=9606 GN=EGF PE=1 SV=2
3065	3215	P09326|CD48_HUMAN	P09326	CD48	HUMAN	58.16	5	5	0	0	0	0				1	1	1	0	0	0	Carbamidomethylation	27683	CD48 antigen OS=Homo sapiens OX=9606 GN=CD48 PE=1 SV=2
1315	2646	Q8NG11|TSN14_HUMAN	Q8NG11	TSN14	HUMAN	58.05	4	4	4	4	4	5873.5	3078.8	1651.6	6431.3	1	1	1	1	1	1	Carbamidomethylation	30691	Tetraspanin-14 OS=Homo sapiens OX=9606 GN=TSPAN14 PE=1 SV=1
1279	2178	P0DPA2|VSIG8_HUMAN	P0DPA2	VSIG8	HUMAN	58.04	3	3	3	3	3	0	20342	0	530.11	1	1	1	1	1	1	Carbamidomethylation	43891	V-set and immunoglobulin domain-containing protein 8 OS=Homo sapiens OX=9606 GN=VSIG8 PE=2 SV=1
1741	3178	P01601|KVD16_HUMAN	P01601	KVD16	HUMAN	57.79	14	14	14	0	0	635.22	0			1	1	1	1	0	0		12730	Immunoglobulin kappa variable 1D-16 OS=Homo sapiens OX=9606 GN=IGKV1D-16 PE=3 SV=2
1258	1091	O15523|DDX3Y_HUMAN	O15523	DDX3Y	HUMAN	57.78	6	2	2	2	0	577.23		0		4	3	2	1	1	0	Carbamidomethylation	73154	ATP-dependent RNA helicase DDX3Y OS=Homo sapiens OX=9606 GN=DDX3Y PE=1 SV=2
1258	1092	O00571|DDX3X_HUMAN	O00571	DDX3X	HUMAN	57.78	6	2	2	2	0	577.23		0		4	3	2	1	1	0	Carbamidomethylation	73244	ATP-dependent RNA helicase DDX3X OS=Homo sapiens OX=9606 GN=DDX3X PE=1 SV=3
1369	1138	O60486|PLXC1_HUMAN	O60486	PLXC1	HUMAN	57.72	2	1	0	1	0	438.37		883.88		3	3	1	0	2	0	Carbamylation	175741	Plexin-C1 OS=Homo sapiens OX=9606 GN=PLXNC1 PE=1 SV=1
1414	1532	P05026|AT1B1_HUMAN	P05026	AT1B1	HUMAN	57.71	9	9	0	0	0	1225.1				2	2	3	0	0	0		35061	Sodium/potassium-transporting ATPase subunit beta-1 OS=Homo sapiens OX=9606 GN=ATP1B1 PE=1 SV=1
1323	3224	Q9Y2Q3|GSTK1_HUMAN	Q9Y2Q3	GSTK1	HUMAN	57.48	6	6	6	0	6	768.63	609.58		0	1	1	1	2	0	1		25497	Glutathione S-transferase kappa 1 OS=Homo sapiens OX=9606 GN=GSTK1 PE=1 SV=3
1172	1495	O43566|RGS14_HUMAN	O43566	RGS14	HUMAN	57.38	5	2	2	5	0	735.64	471.66	1238.5		2	2	1	1	3	0		61447	Regulator of G-protein signaling 14 OS=Homo sapiens OX=9606 GN=RGS14 PE=1 SV=4
1470	1324	P40939|ECHA_HUMAN	P40939	ECHA	HUMAN	57.21	4	0	0	2	4			710.13	412.78	2	2	0	0	1	2	Carbamidomethylation	83000	Trifunctional enzyme subunit alpha mitochondrial OS=Homo sapiens OX=9606 GN=HADHA PE=1 SV=2
1027	1133	Q9Y4D8|HECD4_HUMAN	Q9Y4D8	HECD4	HUMAN	57.17	1	1	1	0	0	1444.7	5106.1	983.76		4	4	3	3	1	0	Carbamidomethylation; Carbamylation; Acetylation (Protein N-term)	439348	Probable E3 ubiquitin-protein ligase HECTD4 OS=Homo sapiens OX=9606 GN=HECTD4 PE=1 SV=5
1328	3576	Q9P1F3|ABRAL_HUMAN	Q9P1F3	ABRAL	HUMAN	57.09	20	0	0	20	20			375.31	579.19	1	1	0	0	3	1	Deamidation (NQ); Acetylation (Protein N-term)	9056	Costars family protein ABRACL OS=Homo sapiens OX=9606 GN=ABRACL PE=1 SV=1
1204	1898	A0A0A0MS14|HV145_HUMAN	A0A0A0MS14	HV145	HUMAN	57	9	9	9	9	9	0	1205.4	688.23	0	1	1	1	1	1	2	Carbamidomethylation	13508	Immunoglobulin heavy variable 1-45 OS=Homo sapiens OX=9606 GN=IGHV1-45 PE=3 SV=1
1322	3222	P35268|RL22_HUMAN	P35268	RL22	HUMAN	56.87	10	10	10	10	10	1470	1407.4	1635.9	1752.7	1	1	1	1	1	1		14787	60S ribosomal protein L22 OS=Homo sapiens OX=9606 GN=RPL22 PE=1 SV=2
1088	1121	Q13451|FKBP5_HUMAN	Q13451	FKBP5	HUMAN	56.82	9	5	2	3	5	1940.5	50043	1174.3	53247	4	4	2	1	1	2	Carbamylation; Deamidation (NQ); Acetylation (Protein N-term)	51212	Peptidyl-prolyl cis-trans isomerase FKBP5 OS=Homo sapiens OX=9606 GN=FKBP5 PE=1 SV=2
971	2025	P61970|NTF2_HUMAN	P61970	NTF2	HUMAN	56.81	17	17	17	0	0	0	1651.4			2	2	4	5	0	0	Carbamidomethylation	14478	Nuclear transport factor 2 OS=Homo sapiens OX=9606 GN=NUTF2 PE=1 SV=1
1689	1551	Q30154|DRB5_HUMAN	Q30154	DRB5	HUMAN	56.79	10	10	0	0	0	2346.3				2	1	2	0	0	0		30056	HLA class II histocompatibility antigen DR beta 5 chain OS=Homo sapiens OX=9606 GN=HLA-DRB5 PE=1 SV=1
1141	2732	K7EJ46|SIM22_HUMAN	K7EJ46	SIM22	HUMAN	56.73	20	20	20	20	20	1141.9	403.21	603.89	0	1	1	1	2	2	1	Acetylation (Protein N-term)	9249	Small integral membrane protein 22 OS=Homo sapiens OX=9606 GN=SMIM22 PE=1 SV=2
1069	1359	Q8NFJ5|RAI3_HUMAN	Q8NFJ5	RAI3	HUMAN	56.68	9	4	9	4	4	0	753.1	653.69	706.8	2	2	1	3	1	2	Carbamidomethylation	40251	Retinoic acid-induced protein 3 OS=Homo sapiens OX=9606 GN=GPRC5A PE=1 SV=2
1820	2008	P07360|CO8G_HUMAN	P07360	CO8G	HUMAN	56.66	13	7	5	0	0	876.99	993.35			2	2	1	1	0	0		22277	Complement component C8 gamma chain OS=Homo sapiens OX=9606 GN=C8G PE=1 SV=3
844	1672	O43790|KRT86_HUMAN	O43790	KRT86	HUMAN	56.65	5	2	1	3	1			0		3	1	2	2	6	2	Carbamylation	53501	Keratin type II cuticular Hb6 OS=Homo sapiens OX=9606 GN=KRT86 PE=1 SV=1
844	1765	Q14533|KRT81_HUMAN	Q14533	KRT81	HUMAN	56.65	4	2	1	3	1			0		3	1	2	2	6	2	Carbamylation	54928	Keratin type II cuticular Hb1 OS=Homo sapiens OX=9606 GN=KRT81 PE=1 SV=3
844	1771	P78385|KRT83_HUMAN	P78385	KRT83	HUMAN	56.65	4	2	1	3	1			0		3	1	2	2	6	2	Carbamylation	54195	Keratin type II cuticular Hb3 OS=Homo sapiens OX=9606 GN=KRT83 PE=1 SV=2
844	1795	P78386|KRT85_HUMAN	P78386	KRT85	HUMAN	56.65	4	2	1	3	1			0		3	1	2	2	6	2	Carbamylation	55802	Keratin type II cuticular Hb5 OS=Homo sapiens OX=9606 GN=KRT85 PE=1 SV=1
1818	1640	P13716|HEM2_HUMAN	P13716	HEM2	HUMAN	56.65	8	8	0	0	0	711				2	2	2	0	0	0	Carbamidomethylation	36295	Delta-aminolevulinic acid dehydratase OS=Homo sapiens OX=9606 GN=ALAD PE=1 SV=1
1370	1254	Q9NRD9|DUOX1_HUMAN	Q9NRD9	DUOX1	HUMAN	56.63	2	2	1	0	0	0				2	1	2	1	0	0	Carbamidomethylation	177234	Dual oxidase 1 OS=Homo sapiens OX=9606 GN=DUOX1 PE=1 SV=1
1062	1666	P20839|IMDH1_HUMAN	P20839	IMDH1	HUMAN	56.21	4	4	0	0	2	1117.6			592.57	2	2	5	0	0	2	Carbamidomethylation; Deamidation (NQ)	55406	Inosine-5'-monophosphate dehydrogenase 1 OS=Homo sapiens OX=9606 GN=IMPDH1 PE=1 SV=2
1266	1676	O14791|APOL1_HUMAN	O14791	APOL1	HUMAN	56	4	0	4	4	4		760.19	0	772.44	1	1	0	1	1	2		43974	Apolipoprotein L1 OS=Homo sapiens OX=9606 GN=APOL1 PE=1 SV=5
1139	1812	Q9BVC6|TM109_HUMAN	Q9BVC6	TM109	HUMAN	55.99	5	5	5	5	5	556.55	645.32	0	0	1	1	1	1	1	3		26210	Transmembrane protein 109 OS=Homo sapiens OX=9606 GN=TMEM109 PE=1 SV=1
1083	977	P07197|NFM_HUMAN	P07197	NFM	HUMAN	55.89	3	2	1	2	0	43554	3095	0		3	2	3	1	2	0	Carbamylation; Deamidation (NQ); Acetylation (Protein N-term)	102472	Neurofilament medium polypeptide OS=Homo sapiens OX=9606 GN=NEFM PE=1 SV=3
2707	2742	O15305|PMM2_HUMAN	O15305	PMM2	HUMAN	55.65	8	0	0	0	8				393.6	1	1	0	0	0	1	Carbamidomethylation; Acetylation (Protein N-term)	28082	Phosphomannomutase 2 OS=Homo sapiens OX=9606 GN=PMM2 PE=1 SV=1
1283	1203	P26572|MGAT1_HUMAN	P26572	MGAT1	HUMAN	55.34	4	4	2	0	0	0	763.74			2	2	2	2	0	0	Carbamidomethylation	50878	Alpha-1 3-mannosyl-glycoprotein 2-beta-N-acetylglucosaminyltransferase OS=Homo sapiens OX=9606 GN=MGAT1 PE=1 SV=2
1016	2131	Q96FZ7|CHMP6_HUMAN	Q96FZ7	CHMP6	HUMAN	54.99	13	13	6	0	13	446.33	809.17		637.61	2	2	4	1	0	3	Carbamidomethylation; Deamidation (NQ)	23485	Charged multivesicular body protein 6 OS=Homo sapiens OX=9606 GN=CHMP6 PE=1 SV=3
1384	1456	Q7Z2W4|ZCCHV_HUMAN	Q7Z2W4	ZCCHV	HUMAN	54.85	3	0	2	0	3		649.12		1052.4	2	2	0	1	0	2		101431	Zinc finger CCCH-type antiviral protein 1 OS=Homo sapiens OX=9606 GN=ZC3HAV1 PE=1 SV=3
1493	2065	P63151|2ABA_HUMAN	P63151	2ABA	HUMAN	54.84	5	3	5	0	0	620.17	523.09			2	2	1	2	0	0		51692	Serine/threonine-protein phosphatase 2A 55 kDa regulatory subunit B alpha isoform OS=Homo sapiens OX=9606 GN=PPP2R2A PE=1 SV=1
1248	1390	P62191|PRS4_HUMAN	P62191	PRS4	HUMAN	54.74	5	5	5	0	0	0	788.28			2	1	2	2	0	0		49185	26S proteasome regulatory subunit 4 OS=Homo sapiens OX=9606 GN=PSMC1 PE=1 SV=1
1201	1261	O75223|GGCT_HUMAN	O75223	GGCT	HUMAN	54.41	12	12	5	0	12	1289.3	441.09		565.06	2	2	2	1	0	2		21008	Gamma-glutamylcyclotransferase OS=Homo sapiens OX=9606 GN=GGCT PE=1 SV=1
2334	1651	P39060|COIA1_HUMAN	P39060	COIA1	HUMAN	54.33	1	1	0	0	0	831.65				1	1	1	0	0	0		178187	Collagen alpha-1(XVIII) chain OS=Homo sapiens OX=9606 GN=COL18A1 PE=1 SV=5
1296	1562	P54709|AT1B3_HUMAN	P54709	AT1B3	HUMAN	54.31	8	8	0	0	0	0				2	2	4	0	0	0		31513	Sodium/potassium-transporting ATPase subunit beta-3 OS=Homo sapiens OX=9606 GN=ATP1B3 PE=1 SV=1
1237	1118	P78527|PRKDC_HUMAN	P78527	PRKDC	HUMAN	54.27	1	0	0	1	0			1036.6		4	4	0	0	4	0		469093	DNA-dependent protein kinase catalytic subunit OS=Homo sapiens OX=9606 GN=PRKDC PE=1 SV=3
1333	1216	P30679|GNA15_HUMAN	P30679	GNA15	HUMAN	54.15	10	10	0	0	0	1349.9				3	3	4	0	0	0		43568	Guanine nucleotide-binding protein subunit alpha-15 OS=Homo sapiens OX=9606 GN=GNA15 PE=1 SV=2
1111	1572	O15264|MK13_HUMAN	O15264	MK13	HUMAN	54.02	5	2	5	2	2		13335			2	1	2	2	1	1	Carbamylation	42090	Mitogen-activated protein kinase 13 OS=Homo sapiens OX=9606 GN=MAPK13 PE=1 SV=1
1688	1464	Q9Y6G9|DC1L1_HUMAN	Q9Y6G9	DC1L1	HUMAN	53.82	4	2	2	0	0	0	720.92			2	2	1	1	0	0		56579	Cytoplasmic dynein 1 light intermediate chain 1 OS=Homo sapiens OX=9606 GN=DYNC1LI1 PE=1 SV=3
1216	1518	P06748|NPM_HUMAN	P06748	NPM	HUMAN	53.65	19	19	7	7	0	604.51	446	704.41		2	2	3	1	1	0		32575	Nucleophosmin OS=Homo sapiens OX=9606 GN=NPM1 PE=1 SV=2
1336	3578	P02766|TTHY_HUMAN	P02766	TTHY	HUMAN	53.41	9	9	0	0	9	866.47			586.53	1	1	1	0	0	3		15887	Transthyretin OS=Homo sapiens OX=9606 GN=TTR PE=1 SV=1
2436	1701	P51570|GALK1_HUMAN	P51570	GALK1	HUMAN	53.41	3	3	0	0	0	433				1	1	1	0	0	0		42272	Galactokinase OS=Homo sapiens OX=9606 GN=GALK1 PE=1 SV=1
1214	1367	P63167|DYL1_HUMAN	P63167	DYL1	HUMAN	53.33	37	25	37	0	0	372.58	460.48			2	2	3	2	0	0	Carbamidomethylation	10366	Dynein light chain 1 cytoplasmic OS=Homo sapiens OX=9606 GN=DYNLL1 PE=1 SV=1
1102	1773	P45984|MK09_HUMAN	P45984	MK09	HUMAN	53.31	4	2	2	2	4				1240.7	2	1	2	1	1	2	Carbamylation; Oxidation (M)	48139	Mitogen-activated protein kinase 9 OS=Homo sapiens OX=9606 GN=MAPK9 PE=1 SV=2
1308	2094	Q02543|RL18A_HUMAN	Q02543	RL18A	HUMAN	53.19	7	7	7	0	7	663.98	0		628.88	1	1	1	2	0	1	Carbamidomethylation	20762	60S ribosomal protein L18a OS=Homo sapiens OX=9606 GN=RPL18A PE=1 SV=2
1305	1463	Q8WVV4|POF1B_HUMAN	Q8WVV4	POF1B	HUMAN	53.08	4	0	0	4	2			990.45	1574.6	2	2	0	0	3	1		68065	Protein POF1B OS=Homo sapiens OX=9606 GN=POF1B PE=1 SV=3
1424	1198	O60488|ACSL4_HUMAN	O60488	ACSL4	HUMAN	52.7	4	4	2	0	0	0	0			2	2	2	1	0	0		79188	Long-chain-fatty-acid--CoA ligase 4 OS=Homo sapiens OX=9606 GN=ACSL4 PE=1 SV=2
1402	1102	P50502|F10A1_HUMAN	P50502	F10A1	HUMAN	52.67	12	6	0	3	4	1493		0	1338.6	4	4	2	0	1	1		41332	Hsc70-interacting protein OS=Homo sapiens OX=9606 GN=ST13 PE=1 SV=2
1402	1119	Q8IZP2|ST134_HUMAN	Q8IZP2	ST134	HUMAN	52.67	14	9	0	0	5	1493			1338.6	3	3	2	0	0	1		27407	Putative protein FAM10A4 OS=Homo sapiens OX=9606 GN=ST13P4 PE=5 SV=1
1764	1243	O95372|LYPA2_HUMAN	O95372	LYPA2	HUMAN	52.59	7	0	0	7	0			801.58		2	2	0	0	2	0		24737	Acyl-protein thioesterase 2 OS=Homo sapiens OX=9606 GN=LYPLA2 PE=1 SV=1
1008	1112	Q07960|RHG01_HUMAN	Q07960	RHG01	HUMAN	52.53	6	6	4	4	0	1336.3	580.36	620.93		3	3	4	2	2	0		50436	Rho GTPase-activating protein 1 OS=Homo sapiens OX=9606 GN=ARHGAP1 PE=1 SV=1
856	3588	Q6MZM9|PRR27_HUMAN	Q6MZM9	PRR27	HUMAN	52.15	4	4	0	4	4	1232.3		1795.2	2448.2	1	1	2	0	6	4		22720	Proline-rich protein 27 OS=Homo sapiens OX=9606 GN=PRR27 PE=2 SV=1
1212	3309	O14732|IMPA2_HUMAN	O14732	IMPA2	HUMAN	52.08	4	4	4	4	4	923.7	594.28	804.52	0	1	1	1	1	1	2		31321	Inositol monophosphatase 2 OS=Homo sapiens OX=9606 GN=IMPA2 PE=1 SV=1
1190	1303	Q7Z5G4|GOGA7_HUMAN	Q7Z5G4	GOGA7	HUMAN	51.9	14	8	14	8	8	0	1051.8	801.08	605.02	2	2	1	2	1	1	Acetylation (Protein N-term)	15824	Golgin subfamily A member 7 OS=Homo sapiens OX=9606 GN=GOLGA7 PE=1 SV=2
1025	3579	Q9NRX5|SERC1_HUMAN	Q9NRX5	SERC1	HUMAN	51.79	3	3	3	3	3	679.38	613.11	512.21	235.01	1	1	2	2	3	1		50495	Serine incorporator 1 OS=Homo sapiens OX=9606 GN=SERINC1 PE=1 SV=1
829	1116	P35030|TRY3_HUMAN	P35030	TRY3	HUMAN	51.74	9	5	4	4	4	1950.6	0	2268.5	1170.9	3	2	2	1	3	6	Carbamylation; Deamidation (NQ); Acetylation (Protein N-term)	32529	Trypsin-3 OS=Homo sapiens OX=9606 GN=PRSS3 PE=1 SV=2
1730	1519	P41252|SYIC_HUMAN	P41252	SYIC	HUMAN	51.72	2	2	0	0	0	1074.7				2	2	2	0	0	0		144498	Isoleucine--tRNA ligase cytoplasmic OS=Homo sapiens OX=9606 GN=IARS1 PE=1 SV=2
1288	1659	P01880|IGHD_HUMAN	P01880	IGHD	HUMAN	51.51	8	0	5	3	3		0	0	0	2	2	0	2	1	1		42353	Immunoglobulin heavy constant delta OS=Homo sapiens OX=9606 GN=IGHD PE=1 SV=3
1162	1378	P19086|GNAZ_HUMAN	P19086	GNAZ	HUMAN	51.47	6	2	2	6	2			253.33		2	1	1	1	2	1	Carbamidomethylation; Carbamylation	40924	Guanine nucleotide-binding protein G(z) subunit alpha OS=Homo sapiens OX=9606 GN=GNAZ PE=1 SV=3
1448	1167	P48643|TCPE_HUMAN	P48643	TCPE	HUMAN	51.47	6	3	0	3	0	590.51		1190.3		3	3	1	0	2	0	Carbamidomethylation	59671	T-complex protein 1 subunit epsilon OS=Homo sapiens OX=9606 GN=CCT5 PE=1 SV=1
1490	1182	Q04828|AK1C1_HUMAN	Q04828	AK1C1	HUMAN	51.39	8	0	8	0	0		1387			3	3	0	3	0	0	Carbamylation	36788	Aldo-keto reductase family 1 member C1 OS=Homo sapiens OX=9606 GN=AKR1C1 PE=1 SV=1
1490	1190	P42330|AK1C3_HUMAN	P42330	AK1C3	HUMAN	51.39	8	0	8	0	0		1387			3	3	0	3	0	0	Carbamylation	36853	Aldo-keto reductase family 1 member C3 OS=Homo sapiens OX=9606 GN=AKR1C3 PE=1 SV=4
1788	1259	P09093|CEL3A_HUMAN	P09093	CEL3A	HUMAN	51.27	10	5	6	0	0	0	856.2			2	2	1	1	0	0	Carbamidomethylation	29489	Chymotrypsin-like elastase family member 3A OS=Homo sapiens OX=9606 GN=CELA3A PE=1 SV=3
1486	2655	P47914|RL29_HUMAN	P47914	RL29	HUMAN	51.16	9	9	0	9	0	393.36		590.54		1	1	1	0	2	0		17752	60S ribosomal protein L29 OS=Homo sapiens OX=9606 GN=RPL29 PE=1 SV=2
1133	1760	P63279|UBC9_HUMAN	P63279	UBC9	HUMAN	51.07	15	15	6	0	6	1000.2	599.83		0	2	2	3	1	0	2		18007	SUMO-conjugating enzyme UBC9 OS=Homo sapiens OX=9606 GN=UBE2I PE=1 SV=1
1116	2242	O00186|STXB3_HUMAN	O00186	STXB3	HUMAN	51.01	3	3	3	3	3	0	563.47	607.9	635.96	1	1	1	1	1	3		67764	Syntaxin-binding protein 3 OS=Homo sapiens OX=9606 GN=STXBP3 PE=1 SV=2
1405	1298	Q9UHD8|SEPT9_HUMAN	Q9UHD8	SEPT9	HUMAN	50.96	3	2	3	0	0	482.3	1402.3			2	2	1	2	0	0		65402	Septin-9 OS=Homo sapiens OX=9606 GN=SEPTIN9 PE=1 SV=2
1262	1344	Q03252|LMNB2_HUMAN	Q03252	LMNB2	HUMAN	50.73	4	4	1	0	1	0				3	1	2	1	0	1	Carbamylation	69948	Lamin-B2 OS=Homo sapiens OX=9606 GN=LMNB2 PE=1 SV=4
1038	1613	Q93050|VPP1_HUMAN	Q93050	VPP1	HUMAN	50.72	2	1	0	2	1	0		471.52	446.25	2	2	1	0	2	4	Carbamylation; Deamidation (NQ)	96413	V-type proton ATPase 116 kDa subunit a1 OS=Homo sapiens OX=9606 GN=ATP6V0A1 PE=1 SV=3
1467	1178	O75436|VP26A_HUMAN	O75436	VP26A	HUMAN	50.55	13	0	13	0	0		1094.3			3	3	0	3	0	0		38170	Vacuolar protein sorting-associated protein 26A OS=Homo sapiens OX=9606 GN=VPS26A PE=1 SV=2
1409	1173	Q13228|SBP1_HUMAN	Q13228	SBP1	HUMAN	50.53	8	4	4	0	0	595.86	992.78			3	3	1	2	0	0		52391	Methanethiol oxidase OS=Homo sapiens OX=9606 GN=SELENBP1 PE=1 SV=2
2613	1835	P45974|UBP5_HUMAN	P45974	UBP5	HUMAN	50.37	2	0	0	0	2				0	1	1	0	0	0	1	Acetylation (Protein N-term)	95786	Ubiquitin carboxyl-terminal hydrolase 5 OS=Homo sapiens OX=9606 GN=USP5 PE=1 SV=2
1142	3587	Q96DR8|MUCL1_HUMAN	Q96DR8	MUCL1	HUMAN	50.14	10	0	10	10	10		946.11	941.84	0	1	1	0	4	1	1	Deamidation (NQ)	9039	Mucin-like protein 1 OS=Homo sapiens OX=9606 GN=MUCL1 PE=1 SV=1
1303	1349	P12236|ADT3_HUMAN	P12236	ADT3	HUMAN	50.02	6	0	0	6	3			1122.4	1014.6	2	2	0	0	2	2		32866	ADP/ATP translocase 3 OS=Homo sapiens OX=9606 GN=SLC25A6 PE=1 SV=4
1303	1350	P05141|ADT2_HUMAN	P05141	ADT2	HUMAN	50.02	6	0	0	6	3			1122.4	1014.6	2	2	0	0	2	2		32852	ADP/ATP translocase 2 OS=Homo sapiens OX=9606 GN=SLC25A5 PE=1 SV=7
1485	2043	Q6UXB2|CXL17_HUMAN	Q6UXB2	CXL17	HUMAN	49.97	13	6	0	8	6	2283.4		0	2336.3	2	2	1	0	1	1	Carbamidomethylation	13819	C-X-C motif chemokine 17 OS=Homo sapiens OX=9606 GN=CXCL17 PE=1 SV=1
1373	1188	Q9Y2Q0|AT8A1_HUMAN	Q9Y2Q0	AT8A1	HUMAN	49.97	2	0	0	1	2			1064.1	1286.3	2	2	0	0	1	2		131369	Phospholipid-transporting ATPase IA OS=Homo sapiens OX=9606 GN=ATP8A1 PE=1 SV=1
2551	2055	O75636|FCN3_HUMAN	O75636	FCN3	HUMAN	49.93	3	0	3	0	0		0			1	1	0	1	0	0		32903	Ficolin-3 OS=Homo sapiens OX=9606 GN=FCN3 PE=1 SV=2
1461	1740	B0FP48|UPK3L_HUMAN	B0FP48	UPK3L	HUMAN	49.92	8	0	8	5	0		0	0		2	2	0	2	1	0		28385	Uroplakin-3b-like protein 1 OS=Homo sapiens OX=9606 GN=UPK3BL1 PE=2 SV=1
1461	1741	E5RIL1|UPKL2_HUMAN	E5RIL1	UPKL2	HUMAN	49.92	8	0	8	5	0		0	0		2	2	0	2	1	0		28385	Uroplakin-3b-like protein 2 OS=Homo sapiens OX=9606 GN=UPK3BL2 PE=3 SV=2
1775	2263	O43242|PSMD3_HUMAN	O43242	PSMD3	HUMAN	49.83	2	2	2	0	0	592.51	735.18			1	1	1	1	0	0		60978	26S proteasome non-ATPase regulatory subunit 3 OS=Homo sapiens OX=9606 GN=PSMD3 PE=1 SV=2
1269	1205	P20061|TCO1_HUMAN	P20061	TCO1	HUMAN	49.82	6	6	0	2	2	2767.2		1284	1477.4	2	2	2	0	1	1	Carbamidomethylation	48207	Transcobalamin-1 OS=Homo sapiens OX=9606 GN=TCN1 PE=1 SV=2
1396	1231	O15484|CAN5_HUMAN	O15484	CAN5	HUMAN	49.78	3	2	1	0	0	951.99	610.64			2	2	1	2	0	0		73169	Calpain-5 OS=Homo sapiens OX=9606 GN=CAPN5 PE=1 SV=2
1427	1386	Q16706|MA2A1_HUMAN	Q16706	MA2A1	HUMAN	49.77	2	0	1	0	2		682.97		1206.6	2	2	0	1	0	2	Carbamidomethylation	131140	Alpha-mannosidase 2 OS=Homo sapiens OX=9606 GN=MAN2A1 PE=1 SV=2
1705	1983	O43747|AP1G1_HUMAN	O43747	AP1G1	HUMAN	49.73	1	0	1	0	1		2708.3		0	1	1	0	1	0	1	Deamidation (NQ)	91351	AP-1 complex subunit gamma-1 OS=Homo sapiens OX=9606 GN=AP1G1 PE=1 SV=5
922	3582	Q6UXB3|LYPD2_HUMAN	Q6UXB3	LYPD2	HUMAN	49.6	11	11	11	0	11	17563	0		1297.6	1	1	5	2	0	3	Deamidation (NQ)	13115	Ly6/PLAUR domain-containing protein 2 OS=Homo sapiens OX=9606 GN=LYPD2 PE=1 SV=1
1229	1157	P20929|NEBU_HUMAN	P20929	NEBU	HUMAN	49.5	0	0	0	0	0	595.38	5169.8		1687.1	3	3	2	1	0	1	Deamidation (NQ)	772931	Nebulin OS=Homo sapiens OX=9606 GN=NEB PE=1 SV=5
2772	1558	Q53GD3|CTL4_HUMAN	Q53GD3	CTL4	HUMAN	49.48	2	0	2	0	0		1540.1			1	1	0	1	0	0		79254	Choline transporter-like protein 4 OS=Homo sapiens OX=9606 GN=SLC44A4 PE=1 SV=2
975	1732	Q8NDH2|CC168_HUMAN	Q8NDH2	CC168	HUMAN	49.48	1	0	0	1	0			44912		2	1	2	2	3	1	Oxidation (M)	277949	Coiled-coil domain-containing protein 168 OS=Homo sapiens OX=9606 GN=CCDC168 PE=2 SV=2
1452	1528	P09496|CLCA_HUMAN	P09496	CLCA	HUMAN	49.48	6	0	4	6	0		0	2461.1		2	2	0	1	2	0	Carbamidomethylation	27077	Clathrin light chain A OS=Homo sapiens OX=9606 GN=CLTA PE=1 SV=1
1507	3098	Q96N66|MBOA7_HUMAN	Q96N66	MBOA7	HUMAN	49.42	4	0	0	4	4			526.77	481.3	1	1	0	0	2	1	Carbamidomethylation	52765	Lysophospholipid acyltransferase 7 OS=Homo sapiens OX=9606 GN=MBOAT7 PE=1 SV=2
1819	1686	P24534|EF1B_HUMAN	P24534	EF1B	HUMAN	49.26	10	10	0	0	0	0				2	2	2	0	0	0		24764	Elongation factor 1-beta OS=Homo sapiens OX=9606 GN=EEF1B2 PE=1 SV=3
1010	3585	P01704|LV214_HUMAN	P01704	LV214	HUMAN	49.26	13	13	13	13	13	8223.9	5379.3	748.44	873.49	1	1	3	3	1	1	Deamidation (NQ)	12597	Immunoglobulin lambda variable 2-14 OS=Homo sapiens OX=9606 GN=IGLV2-14 PE=1 SV=2
1479	3226	P61077|UB2D3_HUMAN	P61077	UB2D3	HUMAN	49.17	7	7	7	7	0	2558.3	2554.8	1636.5		1	1	1	1	1	0		16687	Ubiquitin-conjugating enzyme E2 D3 OS=Homo sapiens OX=9606 GN=UBE2D3 PE=1 SV=1
1479	3586	P62837|UB2D2_HUMAN	P62837	UB2D2	HUMAN	49.17	7	7	7	7	0	2558.3	2554.8	1636.5		1	1	1	1	1	0		16735	Ubiquitin-conjugating enzyme E2 D2 OS=Homo sapiens OX=9606 GN=UBE2D2 PE=1 SV=1
1700	1291	Q9NPA2|MMP25_HUMAN	Q9NPA2	MMP25	HUMAN	49.17	4	2	3	0	0	0	965.06			2	2	1	1	0	0		62554	Matrix metalloproteinase-25 OS=Homo sapiens OX=9606 GN=MMP25 PE=1 SV=1
1497	3158	P49908|SEPP1_HUMAN	P49908	SEPP1	HUMAN	49.15	3	0	0	3	3			0	624.58	1	1	0	0	1	2		43174	Selenoprotein P OS=Homo sapiens OX=9606 GN=SELENOP PE=1 SV=3
2870	2454	Q15369|ELOC_HUMAN	Q15369	ELOC	HUMAN	49.11	9	0	9	0	0		853.23			1	1	0	1	0	0		12473	Elongin-C OS=Homo sapiens OX=9606 GN=ELOC PE=1 SV=1
1310	2796	Q9Y5P6|GMPPB_HUMAN	Q9Y5P6	GMPPB	HUMAN	48.95	5	0	5	0	5		629.39		507.37	1	1	0	1	0	3	Carbamidomethylation; Deamidation (NQ)	39834	Mannose-1-phosphate guanyltransferase beta OS=Homo sapiens OX=9606 GN=GMPPB PE=1 SV=2
1151	1250	Q96C19|EFHD2_HUMAN	Q96C19	EFHD2	HUMAN	48.87	10	10	5	5	5	1673.2	1330.7	523.49	0	2	2	2	1	1	1		26697	EF-hand domain-containing protein D2 OS=Homo sapiens OX=9606 GN=EFHD2 PE=1 SV=1
1166	1521	P19338|NUCL_HUMAN	P19338	NUCL	HUMAN	48.87	3	3	3	0	0	865.38	272.07			1	1	4	1	0	0		76615	Nucleolin OS=Homo sapiens OX=9606 GN=NCL PE=1 SV=3
1471	1577	Q9UQ80|PA2G4_HUMAN	Q9UQ80	PA2G4	HUMAN	48.85	6	4	2	0	4	1553.2	672.79		739.05	2	2	1	1	0	1		43787	Proliferation-associated protein 2G4 OS=Homo sapiens OX=9606 GN=PA2G4 PE=1 SV=3
2498	2100	P09874|PARP1_HUMAN	P09874	PARP1	HUMAN	48.83	2	2	0	0	0	0				1	1	1	0	0	0		113084	Poly [ADP-ribose] polymerase 1 OS=Homo sapiens OX=9606 GN=PARP1 PE=1 SV=4
1276	2418	P84098|RL19_HUMAN	P84098	RL19	HUMAN	48.78	9	9	0	9	9	520.73		564.41	454.47	1	1	1	0	1	2		23466	60S ribosomal protein L19 OS=Homo sapiens OX=9606 GN=RPL19 PE=1 SV=1
1814	3584	Q9BYD5|CNFN_HUMAN	Q9BYD5	CNFN	HUMAN	48.76	20	20	0	0	0	419.27				1	1	2	0	0	0	Carbamidomethylation	12376	Cornifelin OS=Homo sapiens OX=9606 GN=CNFN PE=1 SV=2
1494	2153	P30536|TSPO_HUMAN	P30536	TSPO	HUMAN	48.71	9	5	0	5	5	1921.2		2970.6	0	2	2	1	0	1	1		18828	Translocator protein OS=Homo sapiens OX=9606 GN=TSPO PE=1 SV=3
1309	2147	Q9UGN4|CLM8_HUMAN	Q9UGN4	CLM8	HUMAN	48.69	10	6	6	10	0	812.53	794.77	561.56		2	2	1	1	2	0	Carbamidomethylation; Deamidation (NQ)	33201	CMRF35-like molecule 8 OS=Homo sapiens OX=9606 GN=CD300A PE=1 SV=2
1284	1422	P17612|KAPCA_HUMAN	P17612	KAPCA	HUMAN	48.68	5	5	3	0	0	1843	1465.1			2	2	3	1	0	0		40590	cAMP-dependent protein kinase catalytic subunit alpha OS=Homo sapiens OX=9606 GN=PRKACA PE=1 SV=2
1284	1429	P22694|KAPCB_HUMAN	P22694	KAPCB	HUMAN	48.68	5	5	3	0	0	1843	1465.1			2	2	3	1	0	0		40623	cAMP-dependent protein kinase catalytic subunit beta OS=Homo sapiens OX=9606 GN=PRKACB PE=1 SV=2
1202	1372	P51178|PLCD1_HUMAN	P51178	PLCD1	HUMAN	48.58	3	3	1	1	0	597.21	0	1552.3		2	2	2	1	2	0	Deamidation (NQ)	85665	1-phosphatidylinositol 4 5-bisphosphate phosphodiesterase delta-1 OS=Homo sapiens OX=9606 GN=PLCD1 PE=1 SV=2
1177	1395	Q9Y2A7|NCKP1_HUMAN	Q9Y2A7	NCKP1	HUMAN	48.56	2	1	1	1	2	931.93	0	540.11	697.42	2	1	1	1	1	2		128790	Nck-associated protein 1 OS=Homo sapiens OX=9606 GN=NCKAP1 PE=1 SV=1
3135	3595	P30408|T4S1_HUMAN	P30408	T4S1	HUMAN	48.53	4	0	0	4	0			7581.2		1	1	0	0	1	0		21632	Transmembrane 4 L6 family member 1 OS=Homo sapiens OX=9606 GN=TM4SF1 PE=1 SV=1
1169	1517	P47895|AL1A3_HUMAN	P47895	AL1A3	HUMAN	48.49	4	2	2	2	4				599.04	2	1	1	1	1	2	Carbamidomethylation; Acetylation (Protein N-term)	56109	Aldehyde dehydrogenase family 1 member A3 OS=Homo sapiens OX=9606 GN=ALDH1A3 PE=1 SV=2
1498	3166	Q6EEV6|SUMO4_HUMAN	Q6EEV6	SUMO4	HUMAN	48.44	13	13	13	13	0	801.86	788.17	1282.5		1	1	1	1	1	0		10685	Small ubiquitin-related modifier 4 OS=Homo sapiens OX=9606 GN=SUMO4 PE=1 SV=2
1498	3589	P61956|SUMO2_HUMAN	P61956	SUMO2	HUMAN	48.44	13	13	13	13	0	801.86	788.17	1282.5		1	1	1	1	1	0		10871	Small ubiquitin-related modifier 2 OS=Homo sapiens OX=9606 GN=SUMO2 PE=1 SV=3
1498	3590	P55854|SUMO3_HUMAN	P55854	SUMO3	HUMAN	48.44	12	12	12	12	0	801.86	788.17	1282.5		1	1	1	1	1	0		11637	Small ubiquitin-related modifier 3 OS=Homo sapiens OX=9606 GN=SUMO3 PE=1 SV=2
1211	2495	Q9NPY3|C1QR1_HUMAN	Q9NPY3	C1QR1	HUMAN	48.34	2	2	2	2	0	0	405.78	0		1	1	2	2	1	0	Carbamidomethylation	68560	Complement component C1q receptor OS=Homo sapiens OX=9606 GN=CD93 PE=1 SV=3
1505	1264	Q9UBQ0|VPS29_HUMAN	Q9UBQ0	VPS29	HUMAN	48.2	12	12	7	0	0	1557.3	419.32			2	2	2	1	0	0	Carbamidomethylation	20506	Vacuolar protein sorting-associated protein 29 OS=Homo sapiens OX=9606 GN=VPS29 PE=1 SV=1
1484	1789	Q14435|GALT3_HUMAN	Q14435	GALT3	HUMAN	48.16	3	2	0	3	0			310.7		2	1	1	0	2	0	Carbamidomethylation	72610	Polypeptide N-acetylgalactosaminyltransferase 3 OS=Homo sapiens OX=9606 GN=GALNT3 PE=1 SV=2
1477	2978	Q96IY4|CBPB2_HUMAN	Q96IY4	CBPB2	HUMAN	47.96	3	3	3	3	0	0	622.31	336.72		1	1	1	1	1	0		48424	Carboxypeptidase B2 OS=Homo sapiens OX=9606 GN=CPB2 PE=1 SV=2
1699	1262	P04066|FUCO_HUMAN	P04066	FUCO	HUMAN	47.82	5	0	0	5	0			1618.1		2	2	0	0	2	0		53689	Tissue alpha-L-fucosidase OS=Homo sapiens OX=9606 GN=FUCA1 PE=1 SV=4
1140	2099	P58546|MTPN_HUMAN	P58546	MTPN	HUMAN	47.75	23	0	14	23	23		0	670.23	0	2	2	0	2	2	2	Carbamidomethylation; Acetylation (Protein N-term)	12895	Myotrophin OS=Homo sapiens OX=9606 GN=MTPN PE=1 SV=2
1356	1563	Q8N3R9|MPP5_HUMAN	Q8N3R9	MPP5	HUMAN	47.73	3	2	0	2	1	0		455.62	1852.2	2	2	1	0	1	1	Deamidation (NQ)	77294	MAGUK p55 subfamily member 5 OS=Homo sapiens OX=9606 GN=MPP5 PE=1 SV=3
1766	1533	P51858|HDGF_HUMAN	P51858	HDGF	HUMAN	47.63	8	5	3	0	0	630.31	1608.1			2	2	1	1	0	0		26788	Hepatoma-derived growth factor OS=Homo sapiens OX=9606 GN=HDGF PE=1 SV=1
1259	1409	Q9P2E3|ZNFX1_HUMAN	Q9P2E3	ZNFX1	HUMAN	47.6	1	0	0	0	1			3074.1	297.59	2	2	0	0	2	2	Deamidation (NQ)	220225	NFX1-type zinc finger-containing protein 1 OS=Homo sapiens OX=9606 GN=ZNFX1 PE=2 SV=2
1451	1416	Q9BR76|COR1B_HUMAN	Q9BR76	COR1B	HUMAN	47.48	4	2	2	0	2	696.15	421.76		875.16	2	2	1	1	0	1		54235	Coronin-1B OS=Homo sapiens OX=9606 GN=CORO1B PE=1 SV=1
1791	1814	Q8N392|RHG18_HUMAN	Q8N392	RHG18	HUMAN	47.24	4	4	0	0	0	1675.6				2	2	2	0	0	0		74977	Rho GTPase-activating protein 18 OS=Homo sapiens OX=9606 GN=ARHGAP18 PE=1 SV=3
1499	3237	Q13867|BLMH_HUMAN	Q13867	BLMH	HUMAN	47.24	2	2	0	2	2	638.43		0	612.24	1	1	1	0	1	1		52562	Bleomycin hydrolase OS=Homo sapiens OX=9606 GN=BLMH PE=1 SV=1
1329	3592	Q969L2|MAL2_HUMAN	Q969L2	MAL2	HUMAN	47.16	6	6	6	0	0	1512.7	1263			1	1	2	2	0	0		19125	Protein MAL2 OS=Homo sapiens OX=9606 GN=MAL2 PE=1 SV=1
1412	1473	P51659|DHB4_HUMAN	P51659	DHB4	HUMAN	47.15	3	2	0	2	2	473.32		0	0	2	2	1	0	1	1		79686	Peroxisomal multifunctional enzyme type 2 OS=Homo sapiens OX=9606 GN=HSD17B4 PE=1 SV=3
1226	1197	Q8IVF2|AHNK2_HUMAN	Q8IVF2	AHNK2	HUMAN	47.1	1	0	0	0	0	563.13		1134.5		4	4	2	0	2	0	Carbamylation; Acetylation (Protein N-term)	616641	Protein AHNAK2 OS=Homo sapiens OX=9606 GN=AHNAK2 PE=1 SV=2
1392	1723	Q15057|ACAP2_HUMAN	Q15057	ACAP2	HUMAN	47.06	1	0	1	0	1		1109.3		550.89	1	1	0	2	0	1		88029	Arf-GAP with coiled-coil ANK repeat and PH domain-containing protein 2 OS=Homo sapiens OX=9606 GN=ACAP2 PE=1 SV=3
1171	1217	Q96L46|CPNS2_HUMAN	Q96L46	CPNS2	HUMAN	47.06	8	3	3	8	0			303.65		2	1	2	1	2	0		27660	Calpain small subunit 2 OS=Homo sapiens OX=9606 GN=CAPNS2 PE=1 SV=2
1510	3593	P25024|CXCR1_HUMAN	P25024	CXCR1	HUMAN	47	3	3	3	0	3	980.44	959.7		896.74	1	1	1	1	0	1	Carbamidomethylation	39791	C-X-C chemokine receptor type 1 OS=Homo sapiens OX=9606 GN=CXCR1 PE=1 SV=2
1665	1269	Q13393|PLD1_HUMAN	Q13393	PLD1	HUMAN	46.92	2	1	0	0	1	474.3			416.72	2	2	1	0	0	1		124184	Phospholipase D1 OS=Homo sapiens OX=9606 GN=PLD1 PE=1 SV=1
1215	2462	P21246|PTN_HUMAN	P21246	PTN	HUMAN	46.82	7	0	0	7	7			0	6559.6	1	1	0	0	2	3		18942	Pleiotrophin OS=Homo sapiens OX=9606 GN=PTN PE=1 SV=1
1798	2498	P61587|RND3_HUMAN	P61587	RND3	HUMAN	46.82	5	5	0	0	5	772.26			504.37	1	1	1	0	0	1	Carbamidomethylation	27368	Rho-related GTP-binding protein RhoE OS=Homo sapiens OX=9606 GN=RND3 PE=1 SV=1
1765	1249	P23142|FBLN1_HUMAN	P23142	FBLN1	HUMAN	46.7	3	1	1	0	0	0	0			2	2	1	1	0	0		77214	Fibulin-1 OS=Homo sapiens OX=9606 GN=FBLN1 PE=1 SV=4
1442	1620	P62750|RL23A_HUMAN	P62750	RL23A	HUMAN	46.64	15	0	0	7	15			0	494.05	2	2	0	0	1	2		17695	60S ribosomal protein L23a OS=Homo sapiens OX=9606 GN=RPL23A PE=1 SV=1
1209	1504	O95164|UBL3_HUMAN	O95164	UBL3	HUMAN	46.29	18	18	10	0	10	1866.6	609.01		460.72	2	2	3	1	0	1		13157	Ubiquitin-like protein 3 OS=Homo sapiens OX=9606 GN=UBL3 PE=1 SV=1
1500	3256	Q14242|SELPL_HUMAN	Q14242	SELPL	HUMAN	46.19	3	3	3	3	0	957.8	798.2	545.49		1	1	1	1	1	0		43201	P-selectin glycoprotein ligand 1 OS=Homo sapiens OX=9606 GN=SELPLG PE=1 SV=1
1205	2306	P16284|PECA1_HUMAN	P16284	PECA1	HUMAN	46.15	2	2	2	2	2	682.49	663.07	0	0	1	1	2	1	1	1	Carbamidomethylation	82522	Platelet endothelial cell adhesion molecule OS=Homo sapiens OX=9606 GN=PECAM1 PE=1 SV=2
1295	1436	P09917|LOX5_HUMAN	P09917	LOX5	HUMAN	46.07	3	0	3	1	1		846.42	0	708.7	2	2	0	2	1	1		77983	Polyunsaturated fatty acid 5-lipoxygenase OS=Homo sapiens OX=9606 GN=ALOX5 PE=1 SV=2
1379	1170	P08237|PFKAM_HUMAN	P08237	PFKAM	HUMAN	46	4	3	1	0	0	499.5				3	1	2	1	0	0	Carbamidomethylation; Carbamylation; Deamidation (NQ)	85183	ATP-dependent 6-phosphofructokinase muscle type OS=Homo sapiens OX=9606 GN=PFKM PE=1 SV=2
1203	1449	Q8WZ64|ARAP2_HUMAN	Q8WZ64	ARAP2	HUMAN	45.95	1	1	1	0	0	1544	905.98			2	1	2	2	0	1		193451	Arf-GAP with Rho-GAP domain ANK repeat and PH domain-containing protein 2 OS=Homo sapiens OX=9606 GN=ARAP2 PE=1 SV=3
1319	1866	O75888|TNF13_HUMAN	O75888	TNF13	HUMAN	45.9	4	4	0	0	4	1445.4			2207	1	1	1	0	0	3		27433	Tumor necrosis factor ligand superfamily member 13 OS=Homo sapiens OX=9606 GN=TNFSF13 PE=1 SV=1
1418	1925	Q02978|M2OM_HUMAN	Q02978	M2OM	HUMAN	45.84	5	5	0	5	5	293.53		457.76	0	1	1	1	0	1	1	Acetylation (Protein N-term)	34062	Mitochondrial 2-oxoglutarate/malate carrier protein OS=Homo sapiens OX=9606 GN=SLC25A11 PE=1 SV=3
1066	2448	P09382|LEG1_HUMAN	P09382	LEG1	HUMAN	45.83	13	13	13	13	13	311.11	517.06	0	0	1	1	2	2	2	1	Carbamidomethylation; Carbamylation; Deamidation (NQ); Acetylation (Protein N-term)	14716	Galectin-1 OS=Homo sapiens OX=9606 GN=LGALS1 PE=1 SV=2
1449	1263	Q7RTV2|GSTA5_HUMAN	Q7RTV2	GSTA5	HUMAN	45.76	11	11	0	0	0	1747				3	1	3	0	0	0	Carbamylation; Deamidation (NQ)	25722	Glutathione S-transferase A5 OS=Homo sapiens OX=9606 GN=GSTA5 PE=1 SV=1
1468	1253	P07858|CATB_HUMAN	P07858	CATB	HUMAN	45.74	6	6	3	0	0	2937.1	646.26			2	2	2	1	0	0	Carbamidomethylation	37822	Cathepsin B OS=Homo sapiens OX=9606 GN=CTSB PE=1 SV=3
1030	1370	Q2KJY2|KI26B_HUMAN	Q2KJY2	KI26B	HUMAN	45.71	1	0	0	1	0			3291.3		2	1	1	1	4	1		223881	Kinesin-like protein KIF26B OS=Homo sapiens OX=9606 GN=KIF26B PE=1 SV=1
1480	3275	P04156|PRIO_HUMAN	P04156	PRIO	HUMAN	45.5	5	5	5	0	5	1514.6	1121		0	1	1	1	1	0	1	Carbamidomethylation	27661	Major prion protein OS=Homo sapiens OX=9606 GN=PRNP PE=1 SV=1
1143	3602	P52943|CRIP2_HUMAN	P52943	CRIP2	HUMAN	45.41	8	8	8	8	8	984.97	895.98	480.28	0	1	1	1	3	1	1	Carbamidomethylation	22493	Cysteine-rich protein 2 OS=Homo sapiens OX=9606 GN=CRIP2 PE=1 SV=1
1270	1267	P49419|AL7A1_HUMAN	P49419	AL7A1	HUMAN	45.39	6	3	0	3	3	414.24		10196	13373	2	2	1	0	2	1	Carbamidomethylation; Carbamylation; Deamidation (NQ)	58487	Alpha-aminoadipic semialdehyde dehydrogenase OS=Homo sapiens OX=9606 GN=ALDH7A1 PE=1 SV=5
3066	3219	P42025|ACTY_HUMAN	P42025	ACTY	HUMAN	45.35	3	3	0	0	0	1095.3				1	1	1	0	0	0		42293	Beta-centractin OS=Homo sapiens OX=9606 GN=ACTR1B PE=1 SV=1
3066	3599	P61163|ACTZ_HUMAN	P61163	ACTZ	HUMAN	45.35	3	3	0	0	0	1095.3				1	1	1	0	0	0		42614	Alpha-centractin OS=Homo sapiens OX=9606 GN=ACTR1A PE=1 SV=1
1250	1149	P11940|PABP1_HUMAN	P11940	PABP1	HUMAN	45.32	3	0	0	1	1			608.61	591.28	2	2	0	0	3	1		70671	Polyadenylate-binding protein 1 OS=Homo sapiens OX=9606 GN=PABPC1 PE=1 SV=2
1482	1246	P08185|CBG_HUMAN	P08185	CBG	HUMAN	45.27	10	6	0	4	0	0		650.57		3	3	1	0	2	0		45141	Corticosteroid-binding globulin OS=Homo sapiens OX=9606 GN=SERPINA6 PE=1 SV=1
1744	1637	P62318|SMD3_HUMAN	P62318	SMD3	HUMAN	45.17	15	15	0	0	0	424.32				2	2	2	0	0	0		13916	Small nuclear ribonucleoprotein Sm D3 OS=Homo sapiens OX=9606 GN=SNRPD3 PE=1 SV=1
1159	1600	O75355|ENTP3_HUMAN	O75355	ENTP3	HUMAN	45.17	3	3	3	3	3	1547.7	1104	780.47	0	1	1	1	2	1	1		59105	Ectonucleoside triphosphate diphosphohydrolase 3 OS=Homo sapiens OX=9606 GN=ENTPD3 PE=1 SV=2
1729	1474	P36507|MP2K2_HUMAN	P36507	MP2K2	HUMAN	45.17	3	3	3	0	0	1089.1	863.3			1	1	1	1	0	0		44424	Dual specificity mitogen-activated protein kinase kinase 2 OS=Homo sapiens OX=9606 GN=MAP2K2 PE=1 SV=1
1729	1831	Q02750|MP2K1_HUMAN	Q02750	MP2K1	HUMAN	45.17	3	3	3	0	0	1089.1	863.3			1	1	1	1	0	0		43439	Dual specificity mitogen-activated protein kinase kinase 1 OS=Homo sapiens OX=9606 GN=MAP2K1 PE=1 SV=2
1086	1247	Q8WXX0|DYH7_HUMAN	Q8WXX0	DYH7	HUMAN	45.1	0	0	0	0	0	5806	1538.6	4430.6	404.6	2	2	2	1	2	1	Carbamidomethylation; Carbamylation; Deamidation (NQ)	461163	Dynein heavy chain 7 axonemal OS=Homo sapiens OX=9606 GN=DNAH7 PE=1 SV=2
1320	2365	Q9BVK6|TMED9_HUMAN	Q9BVK6	TMED9	HUMAN	45.1	5	5	0	5	5	1401.7		1008	0	1	1	1	0	2	1		27277	Transmembrane emp24 domain-containing protein 9 OS=Homo sapiens OX=9606 GN=TMED9 PE=1 SV=2
1330	3605	P61923|COPZ1_HUMAN	P61923	COPZ1	HUMAN	45.04	8	8	8	8	8	894.37	711.94	627.52	700.89	1	1	1	1	1	1	Acetylation (Protein N-term)	20198	Coatomer subunit zeta-1 OS=Homo sapiens OX=9606 GN=COPZ1 PE=1 SV=1
1118	1555	P48739|PIPNB_HUMAN	P48739	PIPNB	HUMAN	44.97	6	3	0	6	3	937.54		1322.5	796.27	2	2	2	0	3	1	Carbamidomethylation	31540	Phosphatidylinositol transfer protein beta isoform OS=Homo sapiens OX=9606 GN=PITPNB PE=1 SV=2
1441	1539	P16050|LOX15_HUMAN	P16050	LOX15	HUMAN	44.94	3	2	1	0	0	0	0			2	2	2	1	0	0		74804	Polyunsaturated fatty acid lipoxygenase ALOX15 OS=Homo sapiens OX=9606 GN=ALOX15 PE=1 SV=3
1514	3601	Q53TN4|CYBR1_HUMAN	Q53TN4	CYBR1	HUMAN	44.91	3	3	3	3	0	1767	0	1803.3		1	1	1	1	1	0		31641	Cytochrome b reductase 1 OS=Homo sapiens OX=9606 GN=CYBRD1 PE=1 SV=1
1495	2597	Q9BQR3|PRS27_HUMAN	Q9BQR3	PRS27	HUMAN	44.91	3	3	3	0	3	787.59	730.33		828.91	1	1	1	1	0	1		31940	Serine protease 27 OS=Homo sapiens OX=9606 GN=PRSS27 PE=1 SV=1
3072	3600	P55001|MFAP2_HUMAN	P55001	MFAP2	HUMAN	44.89	5	5	0	0	0	1077.5				1	1	1	0	0	0	Carbamidomethylation	20826	Microfibrillar-associated protein 2 OS=Homo sapiens OX=9606 GN=MFAP2 PE=1 SV=1
1821	2150	P08708|RS17_HUMAN	P08708	RS17	HUMAN	44.86	16	9	0	7	0	435.58		0		2	2	1	0	1	0	Carbamidomethylation	15550	40S ribosomal protein S17 OS=Homo sapiens OX=9606 GN=RPS17 PE=1 SV=2
1287	1483	P62244|RS15A_HUMAN	P62244	RS15A	HUMAN	44.84	14	7	0	14	7	1000.2		1056.9	977.95	2	2	1	0	2	1		14840	40S ribosomal protein S15a OS=Homo sapiens OX=9606 GN=RPS15A PE=1 SV=2
1825	3285	P53634|CATC_HUMAN	P53634	CATC	HUMAN	44.78	3	3	0	0	0	608.69				1	1	2	0	0	0		51854	Dipeptidyl peptidase 1 OS=Homo sapiens OX=9606 GN=CTSC PE=1 SV=2
1294	1238	P00734|THRB_HUMAN	P00734	THRB	HUMAN	44.68	3	3	0	2	0	1778.9		2065.1		2	2	2	0	2	0		70037	Prothrombin OS=Homo sapiens OX=9606 GN=F2 PE=1 SV=2
1293	1227	Q12792|TWF1_HUMAN	Q12792	TWF1	HUMAN	44.47	8	2	2	4	2			488.64	804.48	3	2	1	1	1	1		40283	Twinfilin-1 OS=Homo sapiens OX=9606 GN=TWF1 PE=1 SV=3
1560	1251	A6QL64|AN36A_HUMAN	A6QL64	AN36A	HUMAN	44.46	1	0	1	1	0		827.59	1085.1		2	2	0	1	1	0	Acetylation (Protein N-term)	214499	Ankyrin repeat domain-containing protein 36A OS=Homo sapiens OX=9606 GN=ANKRD36 PE=2 SV=4
1476	2285	Q969Q5|RAB24_HUMAN	Q969Q5	RAB24	HUMAN	44.41	10	0	5	4	4		0	807.94	705.08	2	2	0	1	1	1		23124	Ras-related protein Rab-24 OS=Homo sapiens OX=9606 GN=RAB24 PE=1 SV=1
1321	2446	P00568|KAD1_HUMAN	P00568	KAD1	HUMAN	44.39	6	6	0	6	0	649.81		506.6		1	1	3	0	1	0		21635	Adenylate kinase isoenzyme 1 OS=Homo sapiens OX=9606 GN=AK1 PE=1 SV=3
1822	2195	P01040|CYTA_HUMAN	P01040	CYTA	HUMAN	44.2	15	0	0	8	7			6377.8	598.31	2	2	0	0	1	1		11006	Cystatin-A OS=Homo sapiens OX=9606 GN=CSTA PE=1 SV=1
1326	3062	Q9BS91|S35A5_HUMAN	Q9BS91	S35A5	HUMAN	44.13	2	2	2	2	2	1888.7	0	8023	4831.6	1	1	1	1	1	1		48500	Probable UDP-sugar transporter protein SLC35A5 OS=Homo sapiens OX=9606 GN=SLC35A5 PE=1 SV=2
2964	2490	Q8IUI8|CRLF3_HUMAN	Q8IUI8	CRLF3	HUMAN	44.07	3	0	0	0	3				0	1	1	0	0	0	1		49766	Cytokine receptor-like factor 3 OS=Homo sapiens OX=9606 GN=CRLF3 PE=1 SV=2
1316	3305	P19075|TSN8_HUMAN	P19075	TSN8	HUMAN	44.03	4	4	4	4	4	0	2021.7	2125.1	0	1	1	1	1	1	1		26044	Tetraspanin-8 OS=Homo sapiens OX=9606 GN=TSPAN8 PE=1 SV=1
2970	2743	Q5T700|LRAD1_HUMAN	Q5T700	LRAD1	HUMAN	43.99	6	0	6	0	0		733.29			1	1	0	1	0	0	Carbamidomethylation	21834	Low-density lipoprotein receptor class A domain-containing protein 1 OS=Homo sapiens OX=9606 GN=LDLRAD1 PE=1 SV=1
1444	2339	P02749|APOH_HUMAN	P02749	APOH	HUMAN	43.96	3	3	3	0	3	0	1140.7		904.97	1	1	1	1	0	1		38298	Beta-2-glycoprotein 1 OS=Homo sapiens OX=9606 GN=APOH PE=1 SV=3
1076	3611	Q13185|CBX3_HUMAN	Q13185	CBX3	HUMAN	43.87	7	7	7	7	7	773.41	609.14	831.01	664.35	1	1	1	3	1	2	Carbamidomethylation	20811	Chromobox protein homolog 3 OS=Homo sapiens OX=9606 GN=CBX3 PE=1 SV=4
1793	1852	P02760|AMBP_HUMAN	P02760	AMBP	HUMAN	43.82	2	2	2	0	0	1032.9	1139.5			1	1	1	1	0	0		39000	Protein AMBP OS=Homo sapiens OX=9606 GN=AMBP PE=1 SV=1
1716	1888	P62266|RS23_HUMAN	P62266	RS23	HUMAN	43.79	8	0	0	8	8			1501.2	641.94	1	1	0	0	1	1		15808	40S ribosomal protein S23 OS=Homo sapiens OX=9606 GN=RPS23 PE=1 SV=3
1331	3610	A0A0A0MT89|KJ01_HUMAN	A0A0A0MT89	KJ01	HUMAN	43.68	67	67	0	67	67	5510.5		1341	786.91	1	1	1	0	1	2		1394	Immunoglobulin kappa joining 1 OS=Homo sapiens OX=9606 GN=IGKJ1 PE=4 SV=2
1702	1576	O95373|IPO7_HUMAN	O95373	IPO7	HUMAN	43.58	2	0	1	1	0		0	0		2	2	0	1	1	0	Acetylation (Protein N-term)	119516	Importin-7 OS=Homo sapiens OX=9606 GN=IPO7 PE=1 SV=1
1503	3651	Q99732|LITAF_HUMAN	Q99732	LITAF	HUMAN	43.55	4	4	0	4	4	0		0	3225.8	1	1	1	0	1	1		17107	Lipopolysaccharide-induced tumor necrosis factor-alpha factor OS=Homo sapiens OX=9606 GN=LITAF PE=1 SV=2
1234	1325	Q9NZM1|MYOF_HUMAN	Q9NZM1	MYOF	HUMAN	43.46	1	1	0	1	1				0	2	1	1	0	1	2		234706	Myoferlin OS=Homo sapiens OX=9606 GN=MYOF PE=1 SV=1
1397	2171	Q14203|DCTN1_HUMAN	Q14203	DCTN1	HUMAN	43.35	1	1	1	1	0	0	337.44	616.8		1	1	1	2	1	0	Deamidation (NQ)	141694	Dynactin subunit 1 OS=Homo sapiens OX=9606 GN=DCTN1 PE=1 SV=3
1681	1772	Q96A65|EXOC4_HUMAN	Q96A65	EXOC4	HUMAN	43.35	3	1	0	2	0	0		307.42		2	2	1	0	1	0		110498	Exocyst complex component 4 OS=Homo sapiens OX=9606 GN=EXOC4 PE=1 SV=1
1324	3613	Q9UBQ7|GRHPR_HUMAN	Q9UBQ7	GRHPR	HUMAN	43.2	3	0	0	3	3			1167.9	1043.4	1	1	0	0	3	1		35668	Glyoxylate reductase/hydroxypyruvate reductase OS=Homo sapiens OX=9606 GN=GRHPR PE=1 SV=1
1789	1679	O15371|EIF3D_HUMAN	O15371	EIF3D	HUMAN	43.15	4	3	0	1	0	0		516.21		2	2	1	0	1	0		63973	Eukaryotic translation initiation factor 3 subunit D OS=Homo sapiens OX=9606 GN=EIF3D PE=1 SV=1
1509	3307	Q92973|TNPO1_HUMAN	Q92973	TNPO1	HUMAN	43.08	1	1	1	0	1	862.83	896.07		0	1	1	1	1	0	1		102355	Transportin-1 OS=Homo sapiens OX=9606 GN=TNPO1 PE=1 SV=2
1361	1297	Q3L8U1|CHD9_HUMAN	Q3L8U1	CHD9	HUMAN	43.04	1	0	0	1	1			392.7	508.42	3	3	0	0	2	1	Carbamylation; Deamidation (NQ); Oxidation (M); Acetylation (Protein N-term)	326022	Chromodomain-helicase-DNA-binding protein 9 OS=Homo sapiens OX=9606 GN=CHD9 PE=1 SV=2
